# Supplementary material for: Morphological characterization and transcriptome analysis of leaf angle mutant bhlh112 in maize [Zea mays L.]
Source: Front Plant Sci. 2022 Oct 7;13:995815. doi: 10.3389/fpls.2022.995815 (PMC9585351; doi:10.3389/fpls.2022.995815)
Supplement: Supplementary file 1 [file Table_1.xlsx]

## Sheet: DOWN
Supplementary Table S1 DEGs regulated leaf angle under control treatment group
gene_id	FPKM.b112_CK	FPKM.WT_CK	log2(fc) (b112_CK VS B73_CK)	pval (b112_CK VS B73_CK)	qval (b112_CK VS B73_CK)	regulation	significant
Zm00001d049731	0	90.0519	-19.7804	1.23956e-38	2.46076e-35	down	yes
Zm00001d038840	0	48.0319	-18.8736	1.80198e-33	2.38484e-30	down	yes
Zm00001d003452	0	22.0333	-17.7493	1.38977e-29	1.33767e-26	down	yes
Zm00001d015498	0	21.8324	-17.7361	1.59328e-25	1.01215e-22	down	yes
Zm00001d027240	0	17.9606	-17.4545	2.33562e-36	3.70932e-33	down	yes
Zm00001d034171	0	16.9582	-17.3716	1.56687e-20	6.62269e-18	down	yes
Zm00001d052201	0	16.9118	-17.3677	1.537e-25	9.96322e-23	down	yes
Zm00001d043122	0	13.5624	-17.0493	3.32547e-18	1.07783e-15	down	yes
Zm00001d045759	0	12.0788	-16.8821	3.26234e-27	2.46718e-24	down	yes
Zm00001d022729	0	9.81722	-16.583	9.20596e-21	4.17727e-18	down	yes
Zm00001d016256	0	9.06408	-16.4679	1.14467e-16	3.2755e-14	down	yes
Zm00001d052131	0	6.86185	-16.0663	6.5097e-15	1.49832e-12	down	yes
Zm00001d018551	0	6.77734	-16.0484	2.09411e-11	2.98275e-09	down	yes
Zm00001d039494	0	5.6286	-15.7805	2.49268e-16	6.76708e-14	down	yes
Zm00001d032371	0	5.30672	-15.6955	1.58462e-20	6.62269e-18	down	yes
Zm00001d028394	0	4.8876	-15.5768	4.98421e-16	1.30838e-13	down	yes
Zm00001d021186	0	4.79766	-15.55	9.18972e-13	1.5124e-10	down	yes
Zm00001d003969	0	4.76629	-15.5406	1.56252e-16	4.35353e-14	down	yes
Zm00001d052319	0	4.42519	-15.4335	8.47318e-15	1.89531e-12	down	yes
Zm00001d021608	0	3.56543	-15.1218	6.04367e-13	1.04329e-10	down	yes
Zm00001d002480	0	3.48361	-15.0883	7.4797e-18	2.32919e-15	down	yes
Zm00001d022794	0	3.4691	-15.0823	6.22069e-12	9.27643e-10	down	yes
Zm00001d004723	0	3.31868	-15.0183	1.68153e-13	3.17919e-11	down	yes
Zm00001d041174	0	3.29919	-15.0098	1.59472e-08	1.37644e-06	down	yes
Zm00001d027175	0	3.13731	-14.9372	1.37989e-18	4.86992e-16	down	yes
Zm00001d011009	0	2.96657	-14.8565	1.48532e-13	2.85928e-11	down	yes
Zm00001d036209	0	2.94498	-14.846	8.03855e-15	1.82378e-12	down	yes
Zm00001d007056	0	2.90313	-14.8253	2.87807e-21	1.38509e-18	down	yes
Zm00001d052786	0	2.77546	-14.7604	1.00158e-10	1.27763e-08	down	yes
Zm00001d016734	0	2.60828	-14.6708	8.77302e-16	2.26551e-13	down	yes
Zm00001d037940	0	2.39718	-14.5491	2.53511e-15	6.14677e-13	down	yes
Zm00001d044020	0	2.36858	-14.5317	8.47202e-15	1.89531e-12	down	yes
Zm00001d052168	0	2.19741	-14.4235	1.29429e-16	3.6381e-14	down	yes
Zm00001d042401	0	2.09757	-14.3564	1.3322e-15	3.30583e-13	down	yes
Zm00001d045003	0	2.00058	-14.2881	9.39961e-16	2.38848e-13	down	yes
Zm00001d052183	0	1.89614	-14.2108	5.00537e-12	7.53486e-10	down	yes
Zm00001d025971	0	1.5205	-13.8923	1.80846e-12	2.84367e-10	down	yes
Zm00001d026057	0	1.50364	-13.8762	1.8199e-12	2.84756e-10	down	yes
Zm00001d025140	0	1.48842	-13.8615	5.46045e-09	5.22411e-07	down	yes
Zm00001d031305	0	1.38901	-13.7618	1.95834e-06	0.000110093	down	yes
Zm00001d036996	0	1.25761	-13.6184	8.91575e-05	0.00324859	down	yes
Zm00001d051623	0	1.24	-13.5981	9.6879e-10	1.03958e-07	down	yes
Zm00001d032062	0	1.1001	-13.4253	1.58423e-11	2.26666e-09	down	yes
Zm00001d032105	0	1.09878	-13.4236	6.6105e-07	4.16606e-05	down	yes
Zm00001d021813	0	1.08195	-13.4013	1.13744e-05	0.000526303	down	yes
Zm00001d001029	0	1.04442	-13.3504	2.45817e-07	1.73124e-05	down	yes
Zm00001d003136	0	0.996699	-13.2829	4.98194e-11	6.62097e-09	down	yes
Zm00001d016333	0	0.967385	-13.2399	9.09059e-13	1.50739e-10	down	yes
Zm00001d051261	0	0.941202	-13.2003	4.86642e-08	3.80382e-06	down	yes
Zm00001d052223	0	0.935409	-13.1914	7.28276e-10	8.03202e-08	down	yes
Zm00001d009343	0	0.897466	-13.1316	6.69117e-08	5.08449e-06	down	yes
Zm00001d024023	0	0.872877	-13.0916	9.50635e-06	0.000451345	down	yes
Zm00001d031922	0	0.832256	-13.0228	1.83128e-09	1.86433e-07	down	yes
Zm00001d043084	0	0.777979	-12.9255	1.6199e-09	1.67599e-07	down	yes
Zm00001d031306	0	0.765837	-12.9028	0.000474059	0.0131278	down	yes
Zm00001d038443	0	0.738203	-12.8498	3.4557e-14	7.08152e-12	down	yes
Zm00001d017370	0	0.729544	-12.8328	1.51586e-07	1.10432e-05	down	yes
Zm00001d045285	0	0.660984	-12.6904	1.66593e-10	2.03519e-08	down	yes
Zm00001d052842	0	0.636088	-12.635	8.46846e-06	0.00040879	down	yes
Zm00001d002195	0	0.596266	-12.5417	4.16487e-08	3.31551e-06	down	yes
Zm00001d016262	0	0.534742	-12.3846	4.65222e-05	0.00184942	down	yes
Zm00001d035174	0	0.50237	-12.2945	4.44604e-09	4.31864e-07	down	yes
Zm00001d051867	0	0.498447	-12.2832	3.15079e-08	2.60621e-06	down	yes
Zm00001d015940	0	0.488535	-12.2542	0.000312836	0.00930394	down	yes
Zm00001d043124	0.00560067	27.2906	-12.2505	1.06552e-40	2.41744e-37	down	yes
Zm00001d004754	0	0.477622	-12.2217	0.000533522	0.0144964	down	yes
Zm00001d001823	0	0.476662	-12.2188	1.0962e-05	0.000510538	down	yes
Zm00001d006915	0	0.475589	-12.2155	0.00113372	0.0270348	down	yes
Zm00001d024068	0	0.445007	-12.1196	0.000925157	0.0230477	down	yes
Zm00001d002188	0	0.409705	-12.0004	1.98707e-06	0.000111315	down	yes
Zm00001d038074	0	0.40386	-11.9796	2.86296e-07	1.98985e-05	down	yes
Zm00001d040245	0	0.397775	-11.9577	0.000168692	0.00556981	down	yes
Zm00001d039763	0	0.380151	-11.8924	1.03908e-06	6.23902e-05	down	yes
Zm00001d005714	0	0.371247	-11.8582	2.86572e-06	0.000156668	down	yes
Zm00001d026488	0	0.368753	-11.8484	0.000239976	0.00745827	down	yes
Zm00001d042970	0	0.363852	-11.8291	0.00028472	0.00860472	down	yes
Zm00001d041922	0	0.330892	-11.6921	0.00210796	0.0433086	down	yes
Zm00001d049070	0	0.327606	-11.6777	1.47364e-06	8.57277e-05	down	yes
Zm00001d031794	0	0.324593	-11.6644	5.14578e-06	0.000265765	down	yes
Zm00001d004726	0	0.320195	-11.6447	1.50382e-06	8.71638e-05	down	yes
Zm00001d012682	0	0.31628	-11.627	4.22411e-08	3.35426e-06	down	yes
Zm00001d011430	0	0.287708	-11.4904	8.07388e-07	4.97962e-05	down	yes
Zm00001d033177	0	0.259786	-11.3431	4.33863e-05	0.00173125	down	yes
Zm00001d028845	0	0.257515	-11.3304	0.00094113	0.0233071	down	yes
Zm00001d010554	0	0.249689	-11.2859	0.000319068	0.0094627	down	yes
Zm00001d028850	0	0.246567	-11.2678	0.00110216	0.0265212	down	yes
Zm00001d025839	0	0.233665	-11.1902	4.2452e-05	0.00170468	down	yes
Zm00001d038419	0	0.230686	-11.1717	0.00191862	0.0402251	down	yes
Zm00001d022193	0	0.229414	-11.1637	8.71067e-09	7.95049e-07	down	yes
Zm00001d018707	0	0.21098	-11.0429	0.000590806	0.015868	down	yes
Zm00001d028849	0	0.205513	-11.005	0.0022521	0.0459136	down	yes
Zm00001d044854	0	0.15204	-10.5702	0.000605768	0.0161418	down	yes
Zm00001d048421	0	0.148573	-10.537	0.000255374	0.00780697	down	yes
Zm00001d039520	0	0.147131	-10.5229	0.00111104	0.0266742	down	yes
Zm00001d038469	0	0.141138	-10.4629	0.000925913	0.0230484	down	yes
Zm00001d011603	0	0.137435	-10.4245	0.0013976	0.0318451	down	yes
Zm00001d052463	0	0.133407	-10.3816	0.000304395	0.00910404	down	yes
Zm00001d037666	0	0.128827	-10.3312	2.06715e-05	0.000905638	down	yes
Zm00001d010992	0	0.109663	-10.0989	8.52783e-07	5.21906e-05	down	yes
Zm00001d034382	0	0.098454	-9.94331	0.000877021	0.0220911	down	yes
Zm00001d023531	0	0.093803	-9.87349	0.000811594	0.0206229	down	yes
Zm00001d004164	0	0.084672	-9.72574	0.00063983	0.0169411	down	yes
Zm00001d041861	0	0.0713787	-9.47935	0.000987073	0.0243419	down	yes
Zm00001d027021	0.0767093	50.5785	-9.36491	0.00025212	0.00774477	down	yes
Zm00001d025018	0.0149453	7.59822	-8.98982	9.80508e-15	2.17789e-12	down	yes
Zm00001d038314	0	0.046164	-8.85062	0.000212546	0.00673091	down	yes
Zm00001d009902	0.0844873	37.1907	-8.78199	3.56558e-06	0.000189387	down	yes
Zm00001d006241	0	0.0426339	-8.73586	2.17051e-05	0.000944408	down	yes
Zm00001d043579	0.00869667	3.46754	-8.63923	5.99437e-10	6.68068e-08	down	yes
Zm00001d007156	0.00593167	1.94719	-8.35874	5.80093e-22	2.97185e-19	down	yes
Zm00001d051945	0.00315622	0.966395	-8.25827	1.56692e-09	1.62648e-07	down	yes
Zm00001d030316	0.0893133	20.6155	-7.85063	2.13461e-17	6.39637e-15	down	yes
Zm00001d044579	0.00329467	0.707153	-7.74575	2.26908e-05	0.000976594	down	yes
Zm00001d037000	0.083215	13.6107	-7.35368	0.000716579	0.0185953	down	yes
Zm00001d021982	0.008101	1.05896	-7.03033	5.84413e-10	6.53616e-08	down	yes
Zm00001d002194	0.0161383	1.90465	-6.88289	2.0766e-09	2.10061e-07	down	yes
Zm00001d052883	0.0203397	2.32608	-6.83746	6.30113e-05	0.00241427	down	yes
Zm00001d014888	0.0412113	4.18674	-6.66664	9.13834e-08	6.86197e-06	down	yes
Zm00001d043419	0.0444713	3.68999	-6.3746	3.23687e-06	0.000173964	down	yes
Zm00001d033826	0.150404	11.9026	-6.30629	1.39605e-36	2.33383e-33	down	yes
Zm00001d039538	0.009284	0.711263	-6.25949	3.24087e-07	2.21853e-05	down	yes
Zm00001d020206	0.0209507	1.58088	-6.23758	3.0902e-06	0.000167213	down	yes
Zm00001d006571	0.00634833	0.477383	-6.23263	1.08216e-07	8.04981e-06	down	yes
Zm00001d039672	0.0170217	1.27994	-6.23255	3.60996e-08	2.90286e-06	down	yes
Zm00001d032948	0.0131413	0.957499	-6.18709	8.41196e-10	9.18176e-08	down	yes
Zm00001d005777	0.00857078	0.621665	-6.18057	1.70156e-07	1.23113e-05	down	yes
Zm00001d014168	0.008159	0.579203	-6.14953	7.96478e-05	0.00295262	down	yes
Zm00001d045468	0.0164353	1.06076	-6.01215	0.000124839	0.00431947	down	yes
Zm00001d002899	0.0248633	1.50674	-5.92127	3.17102e-06	0.000171294	down	yes
Zm00001d029958	0.005107	0.302423	-5.88795	3.23613e-05	0.00134189	down	yes
Zm00001d028842	0.00285267	0.1684	-5.88344	0.00230196	0.04675	down	yes
Zm00001d014918	0.0296083	1.73592	-5.87355	2.19294e-05	0.000950264	down	yes
Zm00001d003167	0.0440627	2.07342	-5.55631	6.73426e-06	0.000336851	down	yes
Zm00001d032946	0.057139	2.63651	-5.52801	5.36424e-06	0.000275257	down	yes
Zm00001d025373	0.0256063	1.08464	-5.40457	0.00130456	0.0302018	down	yes
Zm00001d045254	0.00767667	0.299563	-5.28624	9.37466e-05	0.00339917	down	yes
Zm00001d007047	0.0195887	0.76153	-5.28081	0.00164932	0.0360545	down	yes
Zm00001d010356	0.008349	0.322295	-5.27063	0.00180267	0.0383253	down	yes
Zm00001d018854	0.030483	1.11844	-5.19734	2.09184e-05	0.000912682	down	yes
Zm00001d037527	0.00115755	0.0419557	-5.17972	0.000667776	0.0175584	down	yes
Zm00001d003823	0.129964	4.65052	-5.16121	1.21471e-08	1.08075e-06	down	yes
Zm00001d045958	0.0256427	0.904475	-5.14046	4.31286e-11	5.80463e-09	down	yes
Zm00001d052130	0.0101393	0.341248	-5.07279	0.000456007	0.0127165	down	yes
Zm00001d041157	0.0571207	1.91811	-5.06953	2.70843e-09	2.70528e-07	down	yes
Zm00001d010344	0.00795167	0.260342	-5.03301	0.00142232	0.0323156	down	yes
Zm00001d017032	2.92486	91.9321	-4.97413	4.84502e-10	5.51586e-08	down	yes
Zm00001d028906	0.684502	20.5756	-4.90973	5.88589e-07	3.76922e-05	down	yes
Zm00001d042082	0.0841637	2.33719	-4.79544	9.79222e-06	0.000461469	down	yes
Zm00001d025697	0.047767	1.32407	-4.79283	3.84183e-14	7.8223e-12	down	yes
Zm00001d028348	0.55749	14.9674	-4.74673	3.14053e-07	2.15486e-05	down	yes
Zm00001d038202	0.050052	1.3024	-4.7016	0.0011161	0.0267236	down	yes
Zm00001d047089	0.0496798	1.23596	-4.63683	0.00134815	0.0309464	down	yes
Zm00001d033139	0.0188157	0.445118	-4.56418	0.000167156	0.00553061	down	yes
Zm00001d040786	0.593132	13.9954	-4.56045	2.70728e-05	0.00114655	down	yes
Zm00001d017093	0.0192823	0.441	-4.51543	1.35046e-06	7.92875e-05	down	yes
Zm00001d031994	0.0498293	1.1156	-4.48468	0.00240022	0.0482825	down	yes
Zm00001d005679	0.0139013	0.300275	-4.433	3.55213e-06	0.000189015	down	yes
Zm00001d011473	0.0372252	0.743924	-4.32081	0.000477691	0.0132168	down	yes
Zm00001d019527	0.154678	3.02655	-4.29034	5.35875e-08	4.14136e-06	down	yes
Zm00001d050016	0.19236	3.68186	-4.25855	0.000310613	0.00925515	down	yes
Zm00001d051143	0.491416	9.27957	-4.23904	4.25964e-05	0.00170617	down	yes
Zm00001d043965	0.615376	11.5738	-4.23325	2.22894e-11	3.15219e-09	down	yes
Zm00001d038913	0.0813037	1.50535	-4.21063	0.000409353	0.0116403	down	yes
Zm00001d017033	7.6445	139.221	-4.18681	7.8585e-06	0.000384015	down	yes
Zm00001d042914	0.0445035	0.765986	-4.10533	0.000189966	0.00616299	down	yes
Zm00001d039749	0.0578842	0.983888	-4.08725	0.000105466	0.00373873	down	yes
Zm00001d035362	0.059773	1.00207	-4.06735	0.00215792	0.0442491	down	yes
Zm00001d018734	0.520528	8.70608	-4.06398	6.10845e-06	0.000307972	down	yes
Zm00001d032368	0.059845	0.994824	-4.05514	0.00166428	0.0362568	down	yes
Zm00001d026457	1.91265	27.8286	-3.86292	9.30527e-17	2.68694e-14	down	yes
Zm00001d004929	0.0207567	0.301743	-3.86167	3.75314e-08	3.01038e-06	down	yes
Zm00001d036088	0.0862857	1.23858	-3.84342	1.34882e-05	0.000611162	down	yes
Zm00001d016287	0.285192	3.95027	-3.79194	0.00145036	0.0328118	down	yes
Zm00001d017454	0.098067	1.35644	-3.78991	0.000191294	0.00616326	down	yes
Zm00001d035016	1.36662	18.7233	-3.77615	1.67108e-14	3.56231e-12	down	yes
Zm00001d038875	0.0192803	0.250328	-3.69862	0.00193311	0.040449	down	yes
Zm00001d051099	0.771744	9.91838	-3.68391	0.000497238	0.0136506	down	yes
Zm00001d005991	0.00860176	0.109238	-3.66669	0.0002449	0.00755954	down	yes
Zm00001d051096	0.872048	11.0137	-3.65875	0.000524425	0.0142736	down	yes
Zm00001d038049	14.9708	177.466	-3.56733	7.21144e-13	1.21839e-10	down	yes
Zm00001d045817	0.140205	1.65178	-3.55842	0.00198174	0.041249	down	yes
Zm00001d017034	0.0216284	0.252552	-3.54558	0.000265155	0.0080749	down	yes
Zm00001d046485	0.0222387	0.258471	-3.53886	0.00143252	0.0324974	down	yes
Zm00001d008067	0.215739	2.49016	-3.52888	8.36812e-05	0.0030848	down	yes
Zm00001d051995	0.0871497	0.963477	-3.46668	2.84784e-09	2.82517e-07	down	yes
Zm00001d052363	0.429467	4.65281	-3.43748	1.0333e-07	7.72255e-06	down	yes
Zm00001d003411	4.23545	45.5633	-3.42728	2.33808e-07	1.65032e-05	down	yes
Zm00001d015637	0.23823	2.51271	-3.39882	9.26069e-08	6.93743e-06	down	yes
Zm00001d031158	1.24246	12.6517	-3.34806	2.67639e-10	3.12537e-08	down	yes
Zm00001d047090	5.37286	54.0464	-3.33044	4.68745e-16	1.24073e-13	down	yes
Zm00001d028295	0.0636883	0.63766	-3.32369	2.01762e-07	1.44337e-05	down	yes
Zm00001d025067	0.120531	1.17848	-3.28945	0.00037389	0.0108455	down	yes
Zm00001d051085	0.182876	1.77718	-3.28065	0.000913705	0.022834	down	yes
Zm00001d015224	2.54636	24.7421	-3.28046	0.000218722	0.00689896	down	yes
Zm00001d018229	0.261737	2.4998	-3.25562	2.72878e-07	1.90075e-05	down	yes
Zm00001d004886	0.447645	4.20306	-3.23102	0.000169491	0.00559039	down	yes
Zm00001d043729	0.234569	2.19735	-3.22768	1.72642e-05	0.000770171	down	yes
Zm00001d010284	0.630704	5.73615	-3.18505	2.18123e-08	1.84753e-06	down	yes
Zm00001d002970	0.584543	5.31597	-3.18495	0.000190363	0.00616299	down	yes
Zm00001d044039	0.099435	0.899704	-3.17762	0.00132767	0.0305364	down	yes
Zm00001d052684	8.54794	77.1203	-3.17346	0.000138636	0.00473494	down	yes
Zm00001d003365	0.254504	2.21641	-3.12246	0.000140994	0.00479487	down	yes
Zm00001d032024	2.47198	21.2196	-3.10166	2.30047e-23	1.25983e-20	down	yes
Zm00001d006939	3.21738	27.1975	-3.07951	7.43142e-13	1.24234e-10	down	yes
Zm00001d052683	18.043	151.612	-3.07088	9.10046e-05	0.0033073	down	yes
Zm00001d004867	1.56891	12.9383	-3.04382	3.86339e-07	2.58343e-05	down	yes
Zm00001d037792	0.208093	1.6916	-3.02308	5.73928e-06	0.000293553	down	yes
Zm00001d032696	0.568976	4.60814	-3.01774	0.000906504	0.0226719	down	yes
Zm00001d018241	1.07117	8.6554	-3.01441	4.46868e-16	1.19276e-13	down	yes
Zm00001d003392	0.14614	1.17572	-3.00812	3.01908e-07	2.08015e-05	down	yes
Zm00001d052392	1.03304	8.28221	-3.00311	1.22079e-41	2.98277e-38	down	yes
Zm00001d009724	0.0723324	0.57263	-2.98489	7.55244e-07	4.70369e-05	down	yes
Zm00001d033699	1.83357	14.2764	-2.9609	0.000697722	0.0182251	down	yes
Zm00001d033700	2.55605	19.6472	-2.94233	0.00131321	0.0302917	down	yes
Zm00001d043849	1.96469	15.0976	-2.94195	6.87656e-06	0.000342889	down	yes
Zm00001d037515	0.355213	2.67636	-2.91352	1.71135e-06	9.74151e-05	down	yes
Zm00001d018712	0.235607	1.76747	-2.90723	0.000941443	0.0233071	down	yes
Zm00001d052772	0.277433	2.08105	-2.90711	5.95936e-06	0.000301893	down	yes
Zm00001d007845	0.416718	3.12032	-2.90455	6.27423e-06	0.00031583	down	yes
Zm00001d001943	0.773441	5.77569	-2.90063	6.36572e-07	4.02778e-05	down	yes
Zm00001d048625	2.22188	16.5307	-2.8953	7.71513e-07	4.78942e-05	down	yes
Zm00001d052335	1.57713	11.6862	-2.88943	4.31675e-05	0.00172686	down	yes
Zm00001d031993	0.670299	4.88338	-2.865	3.83912e-05	0.00156738	down	yes
Zm00001d019280	0.179824	1.27112	-2.82145	0.000401911	0.0115008	down	yes
Zm00001d020362	0.829453	5.85522	-2.81949	1.98949e-05	0.000876453	down	yes
Zm00001d052083	0.0905816	0.634402	-2.80811	1.66241e-05	0.000745807	down	yes
Zm00001d033020	0.583623	4.07382	-2.80327	7.78957e-06	0.000381233	down	yes
Zm00001d006253	0.041313	0.287546	-2.79912	0.000329965	0.00974946	down	yes
Zm00001d017264	1.54851	10.7475	-2.79505	0.000246846	0.00761219	down	yes
Zm00001d043731	0.196487	1.35849	-2.78949	2.31496e-07	1.63764e-05	down	yes
Zm00001d002156	4.68418	32.3732	-2.78893	7.35931e-21	3.43755e-18	down	yes
Zm00001d030548	0.670546	4.59339	-2.77615	7.80796e-05	0.00290064	down	yes
Zm00001d042633	0.532237	3.58896	-2.75342	0.000150317	0.00505299	down	yes
Zm00001d041725	2.70412	18.14	-2.74594	1.17578e-20	5.11591e-18	down	yes
Zm00001d035304	5.56934	37.3479	-2.74545	2.14555e-12	3.34064e-10	down	yes
Zm00001d012791	0.255135	1.68412	-2.72266	0.000240508	0.00746749	down	yes
Zm00001d000688	0.860421	5.66935	-2.72007	0.000487451	0.0134517	down	yes
Zm00001d024960	0.448287	2.95067	-2.71855	0.001485	0.0334289	down	yes
Zm00001d049071	0.834852	5.46498	-2.71062	0.000243361	0.00752667	down	yes
Zm00001d022457	0.309584	2.01843	-2.70483	0.00162798	0.0357525	down	yes
Zm00001d047087	5.05583	32.78	-2.69679	1.07098e-07	7.98531e-06	down	yes
Zm00001d030086	2.46246	15.8359	-2.68503	6.78667e-06	0.000338939	down	yes
Zm00001d035955	0.889843	5.70233	-2.67993	0.00157161	0.0349084	down	yes
Zm00001d053220	7.03583	44.6907	-2.66718	2.13842e-06	0.000119582	down	yes
Zm00001d039923	0.144807	0.913821	-2.65778	0.00207587	0.0428433	down	yes
Zm00001d003524	1.66296	10.4181	-2.64726	0.000351157	0.010318	down	yes
Zm00001d031923	0.236011	1.47424	-2.64304	1.11224e-10	1.40191e-08	down	yes
Zm00001d037397	0.235459	1.46908	-2.64136	0.00168246	0.0364529	down	yes
Zm00001d044815	2.07856	12.8101	-2.62363	7.10471e-20	2.82084e-17	down	yes
Zm00001d016185	1.97207	12.0918	-2.61625	4.02828e-05	0.00163492	down	yes
Zm00001d029899	3.20298	19.5953	-2.61302	0.000109859	0.0038815	down	yes
Zm00001d051088	18.8507	114.656	-2.60463	0.000365135	0.0106499	down	yes
Zm00001d045203	0.922015	5.56767	-2.59421	0.00115169	0.0273198	down	yes
Zm00001d050328	0.0339366	0.203297	-2.58268	0.00042824	0.0121124	down	yes
Zm00001d052394	0.444038	2.64332	-2.57359	1.77062e-05	0.000787676	down	yes
Zm00001d004167	0.199819	1.17016	-2.54994	0.000368478	0.0107081	down	yes
Zm00001d021897	0.564814	3.29408	-2.54403	0.00050152	0.0137089	down	yes
Zm00001d012420	0.118501	0.690913	-2.54361	0.000497794	0.0136541	down	yes
Zm00001d024071	0.722349	4.17131	-2.52973	0.000868464	0.0218929	down	yes
Zm00001d004486	0.112566	0.643531	-2.51524	2.91666e-05	0.00121897	down	yes
Zm00001d021772	4.41912	25.1892	-2.51098	0.00012266	0.00425798	down	yes
Zm00001d006623	1.04872	5.93516	-2.50065	0.000590996	0.015868	down	yes
Zm00001d009814	2.97635	16.7428	-2.49192	0.00208352	0.0429453	down	yes
Zm00001d014790	27.9585	156.131	-2.4814	0.000103929	0.00368837	down	yes
Zm00001d047548	0.376163	2.09921	-2.48042	0.00199644	0.0414192	down	yes
Zm00001d042376	0.216204	1.20103	-2.47381	0.000176281	0.00577834	down	yes
Zm00001d036638	2.34315	12.8149	-2.4513	0.000137041	0.0046855	down	yes
Zm00001d024262	0.390798	2.13521	-2.44988	1.7046e-13	3.20375e-11	down	yes
Zm00001d040787	2.36297	12.8991	-2.4486	0.000253765	0.00777275	down	yes
Zm00001d045568	8.53376	46.3561	-2.44151	0.00210553	0.0432867	down	yes
Zm00001d047719	2.63316	13.9932	-2.40985	0.000440436	0.0123692	down	yes
Zm00001d003754	0.0701733	0.372716	-2.40908	2.01458e-05	0.000885051	down	yes
Zm00001d035007	0.770014	4.06747	-2.40118	0.000393043	0.0112877	down	yes
Zm00001d018580	0.34279	1.77467	-2.37216	0.0023473	0.0474282	down	yes
Zm00001d021459	28.5697	147.555	-2.3687	0.00107251	0.0259059	down	yes
Zm00001d027524	4.81443	24.8301	-2.36665	1.12412e-05	0.000522771	down	yes
Zm00001d042027	1.10008	5.63721	-2.35737	4.0303e-05	0.00163492	down	yes
Zm00001d003009	5.67675	29.0063	-2.35323	4.16951e-07	2.74764e-05	down	yes
Zm00001d043510	0.481937	2.45553	-2.34912	0.000380732	0.011003	down	yes
Zm00001d007390	2.93173	14.7904	-2.33483	7.57603e-09	6.99527e-07	down	yes
Zm00001d047553	0.361695	1.81607	-2.32797	0.00249026	0.0497473	down	yes
Zm00001d045047	4.57781	22.7968	-2.3161	1.99483e-16	5.46222e-14	down	yes
Zm00001d018500	0.087913	0.437281	-2.31441	0.00170507	0.0367672	down	yes
Zm00001d017288	0.656932	3.25116	-2.30714	0.000399329	0.0114372	down	yes
Zm00001d047710	1.58552	7.82295	-2.30276	0.000480911	0.0132827	down	yes
Zm00001d052229	58.1074	284.623	-2.29226	0.000156934	0.00524154	down	yes
Zm00001d043420	0.303808	1.48424	-2.28849	0.000162667	0.00540461	down	yes
Zm00001d020395	2.0501	9.98716	-2.28438	9.1777e-06	0.000439023	down	yes
Zm00001d008548	3.2679	15.7686	-2.27062	0.000760487	0.0195273	down	yes
Zm00001d021528	1.9869	9.5748	-2.26872	2.43246e-10	2.88291e-08	down	yes
Zm00001d005591	0.346697	1.66891	-2.26716	0.000473139	0.0131252	down	yes
Zm00001d007750	4.00164	19.1601	-2.25944	1.08764e-05	0.00050804	down	yes
Zm00001d019036	7.43262	35.2558	-2.24592	4.40432e-37	7.77191e-34	down	yes
Zm00001d035376	0.0956763	0.450616	-2.23566	0.00185501	0.0391239	down	yes
Zm00001d004624	1.98426	9.32724	-2.23285	0.000109249	0.00386422	down	yes
Zm00001d046416	0.420213	1.96456	-2.22501	0.000146957	0.00499228	down	yes
Zm00001d048592	0.255237	1.18769	-2.21825	0.00181545	0.0385198	down	yes
Zm00001d035377	5.42227	25.2227	-2.21775	1.43326e-13	2.7759e-11	down	yes
Zm00001d009931	0.12543	0.578771	-2.20611	0.00134919	0.0309464	down	yes
Zm00001d010451	1.77621	8.13633	-2.19557	0.000406968	0.0115829	down	yes
Zm00001d007753	14.6402	65.6341	-2.16451	0.0020831	0.0429453	down	yes
Zm00001d012779	0.293474	1.31552	-2.16433	0.000703033	0.0183488	down	yes
Zm00001d009646	0.362651	1.62018	-2.1595	0.00220291	0.0450264	down	yes
Zm00001d015921	4.14813	18.52	-2.15855	9.53955e-13	1.55387e-10	down	yes
Zm00001d018744	53.7656	239.318	-2.15417	0.000603908	0.0161196	down	yes
Zm00001d017495	0.720801	3.1986	-2.14977	0.000685808	0.0179434	down	yes
Zm00001d053696	1.64564	7.29635	-2.14853	0.00127022	0.0294825	down	yes
Zm00001d015348	0.576761	2.55617	-2.14794	1.29573e-05	0.000593885	down	yes
Zm00001d018150	3.76168	16.538	-2.13634	9.29511e-12	1.36056e-09	down	yes
Zm00001d033319	2.39268	10.5052	-2.13441	9.93671e-05	0.00356632	down	yes
Zm00001d009687	3.02019	13.1056	-2.11747	3.82031e-06	0.000200901	down	yes
Zm00001d034725	0.422068	1.82017	-2.10853	0.00103277	0.0251006	down	yes
Zm00001d037766	1.21846	5.1947	-2.09198	7.72025e-07	4.78942e-05	down	yes
Zm00001d027846	10.2527	43.6399	-2.08965	3.00466e-06	0.00016314	down	yes
Zm00001d009717	0.754559	3.21103	-2.08933	0.00109998	0.0264889	down	yes
Zm00001d049016	45.2891	192.113	-2.08472	1.86959e-06	0.000105477	down	yes
Zm00001d030777	0.170603	0.720253	-2.07786	0.000265496	0.00807753	down	yes
Zm00001d041672	2.03109	8.49833	-2.06492	0.000219363	0.00691234	down	yes
Zm00001d039216	1.45132	6.05563	-2.06092	0.000998464	0.0245087	down	yes
Zm00001d053127	0.233696	0.969801	-2.05306	0.00138032	0.0314739	down	yes
Zm00001d039648	7.19802	29.8644	-2.05276	1.90379e-10	2.29054e-08	down	yes
Zm00001d002974	2.80266	11.6264	-2.05253	0.000140633	0.00478772	down	yes
Zm00001d007773	2.99912	12.4303	-2.05125	0.0020167	0.041785	down	yes
Zm00001d003310	0.873608	3.60298	-2.04413	0.00131444	0.030298	down	yes
Zm00001d006828	1.15882	4.76466	-2.03972	0.000366874	0.010681	down	yes
Zm00001d002278	1.55504	6.38328	-2.03735	2.91029e-05	0.00121791	down	yes
Zm00001d029913	3.16199	12.8918	-2.02755	0.000549851	0.0149018	down	yes
Zm00001d037547	6.67535	27.0461	-2.01851	0.00132091	0.030403	down	yes
Zm00001d044192	0.681156	2.75034	-2.01355	0.000379292	0.0109722	down	yes
Zm00001d026632	48.7147	196.535	-2.01236	5.96414e-05	0.00229515	down	yes
Zm00001d035084	0.720322	2.88917	-2.00394	8.5942e-05	0.00314128	down	yes
Zm00001d053068	1.69784	6.77915	-1.9974	5.66356e-07	3.64153e-05	down	yes
Zm00001d045760	0.634314	2.52802	-1.99474	1.11347e-21	5.52614e-19	down	yes
Zm00001d007280	10.0696	40.0524	-1.99188	0.00010168	0.00362882	down	yes
Zm00001d019459	0.464626	1.84335	-1.98819	0.000349467	0.0102779	down	yes
Zm00001d018641	0.867583	3.44096	-1.98774	0.000227539	0.00714162	down	yes
Zm00001d007240	2.96515	11.7118	-1.98179	3.08382e-06	0.000167153	down	yes
Zm00001d019721	1.93328	7.61744	-1.97825	0.000124601	0.00431591	down	yes
Zm00001d034324	0.32615	1.28038	-1.97297	0.00124284	0.0290908	down	yes
Zm00001d004876	0.215698	0.846076	-1.97177	0.000155153	0.00519844	down	yes
Zm00001d052480	2.08136	8.16261	-1.97151	0.000261681	0.00799209	down	yes
Zm00001d015213	2.75645	10.7438	-1.96262	0.0017234	0.0370208	down	yes
Zm00001d029438	4.06944	15.8083	-1.95778	1.81662e-07	1.30842e-05	down	yes
Zm00001d008812	5.95118	23.0905	-1.95605	7.29688e-09	6.7968e-07	down	yes
Zm00001d019593	0.630541	2.44263	-1.95378	2.72632e-07	1.90075e-05	down	yes
Zm00001d007313	0.105705	0.407283	-1.94598	0.00165192	0.0360867	down	yes
Zm00001d004910	2.64515	10.1793	-1.94422	0.000363277	0.0106055	down	yes
Zm00001d044081	0.22663	0.87076	-1.94194	0.000191322	0.00616326	down	yes
Zm00001d022938	0.641647	2.42335	-1.91715	2.97667e-14	6.22025e-12	down	yes
Zm00001d036925	7.94022	29.8385	-1.90992	7.22831e-05	0.00271066	down	yes
Zm00001d020731	1.90679	7.15827	-1.90847	2.41611e-05	0.00103427	down	yes
Zm00001d047938	0.988856	3.6739	-1.89348	0.00191001	0.0400846	down	yes
Zm00001d030759	1.15713	4.29203	-1.89111	0.00202896	0.0420116	down	yes
Zm00001d020171	4.87078	18.042	-1.88914	0.000890342	0.0223204	down	yes
Zm00001d018609	0.519313	1.91985	-1.88632	0.00111646	0.0267236	down	yes
Zm00001d009354	30.244	111.173	-1.87808	0.00158039	0.0349811	down	yes
Zm00001d016874	3.81909	13.7986	-1.85322	0.00161382	0.0355231	down	yes
Zm00001d052361	4.25631	15.2899	-1.8449	2.63431e-13	4.78134e-11	down	yes
Zm00001d052545	3.10098	11.1132	-1.84147	7.75155e-06	0.000379958	down	yes
Zm00001d007274	35.9015	127.927	-1.83321	4.75156e-05	0.00188184	down	yes
Zm00001d020172	8.38488	29.7605	-1.82754	0.00115488	0.0273751	down	yes
Zm00001d034298	3.05666	10.8337	-1.82549	0.00150684	0.0338517	down	yes
Zm00001d004019	1.52829	5.40278	-1.82179	0.000673024	0.0176818	down	yes
Zm00001d004933	6.24119	22.0627	-1.82171	0.00104695	0.0254043	down	yes
Zm00001d005051	0.468074	1.65135	-1.81883	0.000836049	0.0211766	down	yes
Zm00001d019450	0.346029	1.21541	-1.81248	0.00152714	0.0341843	down	yes
Zm00001d052651	14.4817	50.4217	-1.79981	0.00106181	0.0257101	down	yes
Zm00001d011126	0.749216	2.59672	-1.79324	0.0002929	0.00881839	down	yes
Zm00001d043047	14.275	49.1543	-1.78382	0.00020822	0.00664026	down	yes
Zm00001d051754	2.04831	6.99897	-1.77271	0.00167105	0.0363048	down	yes
Zm00001d007188	1.78282	6.06178	-1.76558	5.58739e-09	5.3295e-07	down	yes
Zm00001d000892	0.483941	1.64382	-1.76415	0.00205154	0.0424514	down	yes
Zm00001d008785	0.973738	3.30651	-1.7637	0.000356162	0.0104361	down	yes
Zm00001d023453	1.30888	4.43378	-1.7602	0.000140104	0.00477481	down	yes
Zm00001d007189	5.39376	18.2654	-1.75975	0.000127614	0.00439631	down	yes
Zm00001d033793	7.63227	25.8086	-1.75767	0.000838396	0.0212191	down	yes
Zm00001d033815	0.711403	2.39733	-1.75269	1.51383e-05	0.00068204	down	yes
Zm00001d037605	9.27098	31.0622	-1.74437	0.000208022	0.00664026	down	yes
Zm00001d006659	3.22555	10.6621	-1.72487	0.000798079	0.020361	down	yes
Zm00001d045370	1.98114	6.42981	-1.69845	2.98548e-07	2.06147e-05	down	yes
Zm00001d030588	2.30234	7.44121	-1.69243	0.00175655	0.0375461	down	yes
Zm00001d012333	1.97788	6.38073	-1.68977	0.000592244	0.0158746	down	yes
Zm00001d007279	6.52731	21.0443	-1.68887	6.86079e-09	6.4283e-07	down	yes
Zm00001d034634	14.3789	46.1864	-1.68352	2.43449e-06	0.000135186	down	yes
Zm00001d029628	5.56934	17.8522	-1.68052	5.12585e-05	0.00201251	down	yes
Zm00001d017079	15.1378	48.1331	-1.66887	0.000290025	0.0087567	down	yes
Zm00001d037834	2.05619	6.51681	-1.66419	1.89532e-05	0.000838453	down	yes
Zm00001d010052	6.19794	19.5962	-1.66071	0.00017285	0.00568349	down	yes
Zm00001d039975	0.735765	2.31722	-1.65508	0.00135126	0.0309464	down	yes
Zm00001d036086	1.13689	3.5769	-1.65361	5.2489e-05	0.00204566	down	yes
Zm00001d050959	0.23704	0.745329	-1.65275	0.000209703	0.00665968	down	yes
Zm00001d012836	3.37237	10.5782	-1.64926	0.00196702	0.0410232	down	yes
Zm00001d022628	2.41045	7.54735	-1.64667	4.10961e-05	0.00166073	down	yes
Zm00001d026012	3.3975	10.6269	-1.64518	0.00233954	0.0473317	down	yes
Zm00001d026017	2.76715	8.62284	-1.63976	2.37803e-05	0.00101934	down	yes
Zm00001d036792	8.42407	26.228	-1.63852	0.00241408	0.0485307	down	yes
Zm00001d049020	3.97445	12.2841	-1.62796	0.000103336	0.00367966	down	yes
Zm00001d035646	0.875783	2.70227	-1.62553	0.00156337	0.0348227	down	yes
Zm00001d013289	0.838417	2.58177	-1.62262	0.00185393	0.0391239	down	yes
Zm00001d013130	3.57801	11.0175	-1.62256	0.000805898	0.020511	down	yes
Zm00001d008849	2.31251	7.11515	-1.62143	1.96474e-06	0.000110258	down	yes
Zm00001d026535	2.39732	7.37122	-1.62048	0.000456493	0.0127189	down	yes
Zm00001d020852	1.00684	3.08916	-1.61739	0.00206904	0.042758	down	yes
Zm00001d037114	1.54276	4.72558	-1.61498	0.000488481	0.0134684	down	yes
Zm00001d045388	1.23289	3.75645	-1.60733	0.000281638	0.00851967	down	yes
Zm00001d020963	4.46518	13.5606	-1.60263	0.00131615	0.0303153	down	yes
Zm00001d009716	1.15309	3.49469	-1.59966	1.65351e-09	1.69969e-07	down	yes
Zm00001d033058	3.39664	10.2827	-1.59804	1.78555e-07	1.28897e-05	down	yes
Zm00001d035317	7.85597	23.7118	-1.59374	0.000147971	0.00500532	down	yes
Zm00001d032223	0.785781	2.36567	-1.59005	0.000704019	0.0183594	down	yes
Zm00001d034366	0.931794	2.80242	-1.58859	0.00101835	0.0248432	down	yes
Zm00001d034066	1.2173	3.66107	-1.58858	0.00163816	0.0358601	down	yes
Zm00001d032556	3.96266	11.8866	-1.5848	2.30907e-05	0.000992463	down	yes
Zm00001d026426	0.573988	1.72121	-1.58433	0.00126227	0.0293683	down	yes
Zm00001d003193	3.70362	11.0732	-1.58006	0.000914569	0.0228376	down	yes
Zm00001d002347	45.7576	136.625	-1.57814	3.70306e-06	0.000195707	down	yes
Zm00001d002071	45.0691	134.406	-1.57639	0.0004699	0.0130467	down	yes
Zm00001d028094	22.9613	68.2003	-1.57057	0.000242332	0.00750213	down	yes
Zm00001d023813	1.8122	5.37417	-1.5683	0.000387464	0.0111477	down	yes
Zm00001d033976	22.2672	65.9085	-1.56555	0.00247738	0.049521	down	yes
Zm00001d037194	2.17568	6.33338	-1.54151	0.000173124	0.00568659	down	yes
Zm00001d003469	0.827876	2.39522	-1.53267	1.86115e-05	0.000824489	down	yes
Zm00001d034439	0.43258	1.24407	-1.52402	0.0010321	0.0251006	down	yes
Zm00001d032689	1.57481	4.5256	-1.52293	8.58255e-21	3.95084e-18	down	yes
Zm00001d046743	11.8249	33.9462	-1.52142	0.00130987	0.0302365	down	yes
Zm00001d029820	5.4355	15.5653	-1.51785	0.00110407	0.026547	down	yes
Zm00001d007172	0.58807	1.68268	-1.5167	5.5346e-05	0.00214123	down	yes
Zm00001d027742	14.5594	41.2606	-1.50281	3.72751e-09	3.65422e-07	down	yes
Zm00001d034968	1.59447	4.49185	-1.49423	1.47313e-06	8.57277e-05	down	yes
Zm00001d007632	0.79824	2.24458	-1.49155	4.04953e-07	2.6909e-05	down	yes
Zm00001d013287	4.20344	11.7812	-1.48685	0.000179438	0.00587577	down	yes
Zm00001d046728	54.6231	152.958	-1.48555	0.00109219	0.0263411	down	yes
Zm00001d039513	3.17259	8.8254	-1.476	0.000802482	0.0204404	down	yes
Zm00001d033995	22.7219	62.8898	-1.46874	0.00246371	0.049341	down	yes
Zm00001d037318	4.10304	11.3381	-1.46641	3.458e-06	0.000184599	down	yes
Zm00001d049113	11.4471	31.5851	-1.46426	0.00111585	0.0267236	down	yes
Zm00001d026522	10.7343	29.5855	-1.46267	0.000453842	0.0126673	down	yes
Zm00001d037453	14.2418	39.0768	-1.45618	0.000291829	0.0088028	down	yes
Zm00001d035015	14.4062	39.4936	-1.45493	1.18883e-06	7.05807e-05	down	yes
Zm00001d030213	5.14025	14.0224	-1.44782	0.00160162	0.0353279	down	yes
Zm00001d004078	5.85186	15.9246	-1.44429	0.00152667	0.0341843	down	yes
Zm00001d037681	0.469813	1.27819	-1.44394	0.00118517	0.0279678	down	yes
Zm00001d032363	1.77639	4.80391	-1.43526	0.000101158	0.00361834	down	yes
Zm00001d007474	3.79426	10.2477	-1.43341	0.00244426	0.0491062	down	yes
Zm00001d006720	0.995695	2.68807	-1.4328	8.91847e-05	0.00324859	down	yes
Zm00001d002601	81.5195	220.01	-1.43235	0.00249734	0.0498573	down	yes
Zm00001d053433	4.84477	13.0514	-1.4297	6.57233e-07	4.15024e-05	down	yes
Zm00001d002252	5.43759	14.5656	-1.42152	0.000808221	0.0205537	down	yes
Zm00001d052294	3.09278	8.24802	-1.41515	0.000160352	0.00533326	down	yes
Zm00001d043443	2.27096	6.021	-1.4067	0.000374748	0.0108605	down	yes
Zm00001d002429	3.92662	10.3062	-1.39216	2.23146e-05	0.000963014	down	yes
Zm00001d016799	4.95094	12.9883	-1.39144	9.12034e-07	5.539e-05	down	yes
Zm00001d002856	12.7727	33.3222	-1.38342	3.25412e-05	0.0013476	down	yes
Zm00001d006203	9.95821	25.9702	-1.3829	0.000840584	0.0212284	down	yes
Zm00001d004339	0.202684	0.52848	-1.38262	0.00239818	0.0482722	down	yes
Zm00001d018218	1.46038	3.80529	-1.38166	4.19068e-05	0.00168919	down	yes
Zm00001d003103	2.17065	5.65544	-1.38151	0.00182315	0.0386059	down	yes
Zm00001d048344	33.1084	86.0838	-1.37854	0.00072598	0.0188086	down	yes
Zm00001d006454	4.17567	10.824	-1.37415	0.00112158	0.0268058	down	yes
Zm00001d016705	3.35553	8.65107	-1.36634	0.00212453	0.0436208	down	yes
Zm00001d045188	3.07885	7.91524	-1.36224	0.00157025	0.0349084	down	yes
Zm00001d009820	4.9301	12.5781	-1.35123	1.0313e-05	0.000485292	down	yes
Zm00001d023868	2.38274	6.06772	-1.34853	0.000126521	0.00436636	down	yes
Zm00001d038850	7.79347	19.8455	-1.34848	9.24703e-05	0.00335672	down	yes
Zm00001d031104	0.464194	1.18084	-1.34701	3.7164e-06	0.000196086	down	yes
Zm00001d032955	21.3786	54.1649	-1.34119	3.44922e-08	2.79484e-06	down	yes
Zm00001d036534	4.06448	10.2819	-1.33897	3.89622e-05	0.00158865	down	yes
Zm00001d008179	0.117347	0.296539	-1.33744	0.00074083	0.0190998	down	yes
Zm00001d002597	5.04841	12.7334	-1.33471	2.93378e-05	0.00122452	down	yes
Zm00001d023242	4.22473	10.614	-1.32904	0.000993578	0.0244076	down	yes
Zm00001d015889	1.12229	2.81179	-1.32505	0.00146527	0.033072	down	yes
Zm00001d017247	0.567985	1.42121	-1.32319	0.0007611	0.0195273	down	yes
Zm00001d052525	1.80453	4.50511	-1.31993	4.87408e-08	3.80382e-06	down	yes
Zm00001d045268	2.212	5.51821	-1.31885	0.000203966	0.00653082	down	yes
Zm00001d016679	4.49764	11.2082	-1.31731	4.86752e-10	5.52168e-08	down	yes
Zm00001d052231	5.17182	12.8667	-1.3149	6.73801e-08	5.10786e-06	down	yes
Zm00001d017604	5.79359	14.4122	-1.31476	0.00105152	0.0254958	down	yes
Zm00001d026377	2.36368	5.85748	-1.30925	4.23967e-06	0.000221488	down	yes
Zm00001d007100	0.989626	2.44343	-1.30395	1.13834e-05	0.000526303	down	yes
Zm00001d008177	4.33374	10.6526	-1.29752	9.69078e-05	0.00349782	down	yes
Zm00001d051429	6.22147	15.2702	-1.29539	0.000780857	0.0199697	down	yes
Zm00001d019866	1.96837	4.82197	-1.29262	0.000187363	0.00609757	down	yes
Zm00001d034620	5.27091	12.9057	-1.29189	0.00045828	0.0127575	down	yes
Zm00001d052133	1.06424	2.60472	-1.2913	0.00227286	0.0462774	down	yes
Zm00001d016655	141.797	346.956	-1.29092	0.00107726	0.0260009	down	yes
Zm00001d008004	0.837071	2.04075	-1.28568	0.000504242	0.0137715	down	yes
Zm00001d041332	17.7865	43.3429	-1.28501	0.000448588	0.0125648	down	yes
Zm00001d052393	2.72472	6.62321	-1.28142	0.000444502	0.0124613	down	yes
Zm00001d038537	16.2664	39.2173	-1.26959	0.000119445	0.00416003	down	yes
Zm00001d051656	1.24938	2.99096	-1.2594	2.04447e-05	0.000896939	down	yes
Zm00001d007069	11.8788	28.3193	-1.25339	4.55954e-05	0.00181485	down	yes
Zm00001d028171	2.70263	6.39108	-1.2417	4.37008e-05	0.00174162	down	yes
Zm00001d008311	0.747233	1.76473	-1.23982	0.00160358	0.0353465	down	yes
Zm00001d027956	2.49802	5.89695	-1.23918	0.0011916	0.0280568	down	yes
Zm00001d004331	13.8258	32.6122	-1.23805	6.36505e-05	0.00243289	down	yes
Zm00001d046561	1.33295	3.13207	-1.23249	0.00219235	0.0448791	down	yes
Zm00001d047482	1.63703	3.83679	-1.22882	0.00116637	0.0275856	down	yes
Zm00001d007300	1.28419	3.00364	-1.22585	0.00106688	0.0257894	down	yes
Zm00001d021019	21.0072	48.9373	-1.22005	1.02477e-08	9.24706e-07	down	yes
Zm00001d052425	3.51772	8.19228	-1.21962	1.39568e-06	8.1641e-05	down	yes
Zm00001d017798	1.79011	4.1629	-1.21754	5.81342e-06	0.000296391	down	yes
Zm00001d051093	33.7702	78.3986	-1.21508	0.000439749	0.0123661	down	yes
Zm00001d043125	18.5153	42.6323	-1.20323	2.06844e-07	1.47309e-05	down	yes
Zm00001d027954	2.98501	6.85314	-1.19903	0.0022582	0.0460085	down	yes
Zm00001d016879	0.904602	2.07588	-1.19837	0.00201172	0.0417091	down	yes
Zm00001d012338	36.8985	84.6226	-1.19748	5.20269e-05	0.00203263	down	yes
Zm00001d025932	7.47834	17.0251	-1.18687	0.00017614	0.00577834	down	yes
Zm00001d014292	1.51911	3.45581	-1.1858	0.000505116	0.0137835	down	yes
Zm00001d001771	4.85568	11.0279	-1.18341	0.000147733	0.00500259	down	yes
Zm00001d052375	11.3446	25.6296	-1.17581	7.16493e-05	0.00269061	down	yes
Zm00001d029390	4.13128	9.32117	-1.17392	7.34436e-13	1.23428e-10	down	yes
Zm00001d048215	8.87554	20.0088	-1.17273	0.00130738	0.030223	down	yes
Zm00001d032175	4.63639	10.3095	-1.1529	0.000794784	0.0202932	down	yes
Zm00001d007044	5.38997	11.9203	-1.14507	7.68488e-05	0.00286015	down	yes
Zm00001d013055	5.85595	12.9345	-1.14325	0.000203632	0.00652671	down	yes
Zm00001d023225	1.18442	2.61224	-1.1411	0.00097375	0.0240694	down	yes
Zm00001d023664	3.17906	6.99176	-1.13705	0.00175009	0.037433	down	yes
Zm00001d002351	44.7491	98.3015	-1.13535	0.001407	0.0320361	down	yes
Zm00001d009548	2.70622	5.9221	-1.12983	7.77928e-07	4.80726e-05	down	yes
Zm00001d011758	10.0395	21.9093	-1.12586	0.000358036	0.0104717	down	yes
Zm00001d013073	2.41874	5.2783	-1.12581	9.57733e-05	0.00346143	down	yes
Zm00001d006059	20.0715	43.6461	-1.1207	0.00018509	0.00603596	down	yes
Zm00001d043479	29.7646	64.372	-1.11284	0.000182814	0.00596786	down	yes
Zm00001d016242	3.8133	8.19241	-1.10325	2.9931e-06	0.000162791	down	yes
Zm00001d017167	81.5201	174.922	-1.10148	0.00115588	0.0273783	down	yes
Zm00001d038273	9.05381	19.3398	-1.09498	7.44515e-05	0.0027854	down	yes
Zm00001d042168	3.98619	8.49312	-1.09128	0.00167739	0.0363927	down	yes
Zm00001d045312	5.33691	11.3305	-1.08613	4.12002e-07	2.72634e-05	down	yes
Zm00001d011512	6.40034	13.5808	-1.08535	0.00174135	0.0373214	down	yes
Zm00001d021654	7.10205	15.0046	-1.0791	2.65322e-05	0.00112666	down	yes
Zm00001d025980	3.49806	7.3817	-1.0774	0.00119542	0.0281261	down	yes
Zm00001d020685	45.7923	96.1875	-1.07074	0.000314243	0.00933704	down	yes
Zm00001d039156	19.187	40.2559	-1.06907	9.4592e-06	0.000449779	down	yes
Zm00001d026344	1.42594	2.99151	-1.06896	0.00232395	0.0471062	down	yes
Zm00001d010968	1.59223	3.33589	-1.06702	0.00152548	0.0341843	down	yes
Zm00001d042373	10.9643	22.9644	-1.06658	0.000415379	0.0117906	down	yes
Zm00001d036090	5.21587	10.9096	-1.06462	1.32825e-05	0.000603563	down	yes
Zm00001d004451	3.77285	7.88282	-1.06306	0.0001501	0.00505299	down	yes
Zm00001d007891	2.13463	4.44561	-1.05839	0.00166199	0.0362319	down	yes
Zm00001d007053	5.90018	12.2169	-1.05005	0.00049869	0.0136669	down	yes
Zm00001d046147	2.21689	4.58866	-1.04954	0.00170895	0.0368019	down	yes
Zm00001d002475	2.49434	5.14511	-1.04455	0.000770055	0.0197252	down	yes
Zm00001d047662	8.56305	17.6457	-1.04312	1.53018e-05	0.000687454	down	yes
Zm00001d022275	10.6894	22.0163	-1.04239	5.91763e-05	0.00228109	down	yes
Zm00001d015464	44.6193	91.8324	-1.04133	0.00186184	0.0392419	down	yes
Zm00001d018994	1.59824	3.27211	-1.03373	0.000681692	0.0178652	down	yes
Zm00001d048203	13.1025	26.7814	-1.03139	0.0018864	0.0396806	down	yes
Zm00001d034633	3.42773	6.99146	-1.02834	1.14357e-10	1.42444e-08	down	yes
Zm00001d013908	1.56572	3.18803	-1.02584	0.00159247	0.0351749	down	yes
Zm00001d014557	2.63065	5.3506	-1.02428	0.000467183	0.0129826	down	yes
Zm00001d013612	7.08036	14.3708	-1.02125	0.00175865	0.0375656	down	yes
Zm00001d017955	4.94259	10.0187	-1.01935	0.00121826	0.0286421	down	yes
Zm00001d027621	1.60776	3.25322	-1.01681	0.000123531	0.00428352	down	yes
Zm00001d037468	2.19323	4.4156	-1.00955	0.00018029	0.00589758	down	yes
Zm00001d013443	20.7488	41.679	-1.00629	8.35324e-06	0.000403841	down	yes
Zm00001d029031	5.62571	11.2909	-1.00505	0.00191037	0.0400846	down	yes
Zm00001d051800	6.19354	12.3913	-1.00049	2.9653e-07	2.052e-05	down	yes
Zm00001d012031	18.8302	37.6624	-1.00008	0.0023384	0.0473317	down	yes

## Sheet: UP
Supplementary Table S1 DEGs regulated leaf angle under control treatment group
gene_id	FPKM.b112_CK	FPKM.WT_CK	log2(fc) (b112_CK VS B73_CK)	pval (b112_CK VS B73_CK)	qval (b112_CK VS B73_CK)	regulation	significant
Zm00001d035390	68.4246	0	19.3842	1.03302e-33	1.49145e-30	up	yes
Zm00001d003445	13.7361	0	17.0676	8.62123e-25	5.07104e-22	up	yes
Zm00001d052011	13.1994	0	17.0101	3.69062e-33	4.68901e-30	up	yes
Zm00001d035413	10.7992	0	16.7206	8.40258e-30	8.34035e-27	up	yes
Zm00001d007026	9.95072	0	16.6025	3.64175e-25	2.18251e-22	up	yes
Zm00001d052507	9.23213	0	16.4944	3.00754e-25	1.83708e-22	up	yes
Zm00001d027606	7.65288	0	16.2237	2.02379e-25	1.26042e-22	up	yes
Zm00001d049882	7.61809	0	16.2171	4.24956e-19	1.64608e-16	up	yes
Zm00001d039546	5.59427	0	15.7717	1.21912e-30	1.29077e-27	up	yes
Zm00001d035222	5.47956	0	15.7418	5.13377e-18	1.6145e-15	up	yes
Zm00001d017831	4.47448	0	15.4494	3.02192e-23	1.62687e-20	up	yes
Zm00001d048123	4.26042	0	15.3787	5.90425e-13	1.02667e-10	up	yes
Zm00001d035570	3.73479	0	15.1887	9.90176e-27	6.91924e-24	up	yes
Zm00001d024803	3.62302	0	15.1449	7.92296e-18	2.44327e-15	up	yes
Zm00001d007370	3.3719	0	15.0413	4.63667e-18	1.47275e-15	up	yes
Zm00001d050274	2.96494	0	14.8557	8.00651e-17	2.33313e-14	up	yes
Zm00001d005073	2.64905	0	14.6932	2.06904e-15	5.05531e-13	up	yes
Zm00001d003435	2.22836	0	14.4437	1.32138e-12	2.11975e-10	up	yes
Zm00001d048776	1.73168	0	14.0799	3.45871e-15	8.13771e-13	up	yes
Zm00001d026795	1.72206	0	14.0718	4.65917e-08	3.6631e-06	up	yes
Zm00001d052474	1.60422	0	13.9696	9.1118e-13	1.50739e-10	up	yes
Zm00001d016183	1.36275	0	13.7342	1.79284e-13	3.34976e-11	up	yes
Zm00001d027932	1.34418	0	13.7144	9.57435e-11	1.22625e-08	up	yes
Zm00001d007071	1.1769	0	13.5227	3.94488e-07	2.62686e-05	up	yes
zma-MIR396e	1.15676	0	13.4978	0.000209878	0.00665968	up	yes
Zm00001d000472	1.15236	0	13.4923	1.20648e-16	3.42156e-14	up	yes
ENSRNA049997253	1.08283	0	13.4025	0.00034035	0.0100283	up	yes
Zm00001d050272	0.99336	0	13.2781	9.3352e-14	1.83033e-11	up	yes
Zm00001d030261	0.966875	0	13.2391	2.12133e-08	1.8016e-06	up	yes
Zm00001d027017	0.951543	0	13.2161	8.17909e-08	6.15622e-06	up	yes
Zm00001d018915	0.949025	0	13.2122	4.28067e-10	4.90855e-08	up	yes
Zm00001d039539	0.868639	0	13.0845	7.83218e-10	8.60808e-08	up	yes
Zm00001d001063	0.850172	0	13.0535	5.30822e-09	5.09381e-07	up	yes
Zm00001d013500	0.717773	0	12.8093	3.24822e-09	3.20414e-07	up	yes
Zm00001d026952	0.717696	0	12.8092	3.1984e-08	2.63873e-06	up	yes
Zm00001d027538	0.676123	0	12.7231	3.46979e-11	4.77104e-09	up	yes
Zm00001d044875	0.636759	0	12.6365	1.45752e-05	0.000657603	up	yes
Zm00001d035182	0.601813	0	12.5551	1.39859e-08	1.22716e-06	up	yes
Zm00001d048658	0.58607	0	12.5169	9.09701e-10	9.82817e-08	up	yes
Zm00001d035143	0.579635	0	12.5009	1.65782e-15	4.08197e-13	up	yes
Zm00001d043237	0.571104	0	12.4795	1.4906e-07	1.08841e-05	up	yes
Zm00001d007396	0.563818	0	12.461	5.40102e-10	6.06193e-08	up	yes
Zm00001d032176	0.511719	0	12.3211	0.000167657	0.0055414	up	yes
Zm00001d038641	0.505915	0	12.3047	9.69387e-06	0.000457513	up	yes
Zm00001d035444	0.497745	0	12.2812	1.35209e-12	2.15812e-10	up	yes
Zm00001d052207	0.464975	0	12.1829	4.33836e-07	2.85298e-05	up	yes
Zm00001d039574	0.463574	0	12.1786	0.000736753	0.0190101	up	yes
Zm00001d029353	0.45638	0	12.156	6.63376e-09	6.23397e-07	up	yes
Zm00001d047165	0.454162	0	12.149	3.25389e-08	2.67063e-06	up	yes
Zm00001d019236	0.450888	0	12.1386	0.00127071	0.0294825	up	yes
Zm00001d007160	0.448935	0	12.1323	0.000659818	0.0173984	up	yes
Zm00001d007064	0.405661	0	11.9861	9.02577e-16	2.31198e-13	up	yes
Zm00001d014114	0.403875	0	11.9797	5.67008e-13	9.9502e-11	up	yes
Zm00001d007018	48.2897	0.0120617	11.9671	7.31759e-30	7.4977e-27	up	yes
Zm00001d006947	0.397515	0	11.9568	6.42815e-09	6.09485e-07	up	yes
Zm00001d007046	0.390237	0	11.9301	3.24866e-08	2.67063e-06	up	yes
Zm00001d012431	0.389331	0	11.9268	0.00024146	0.00748244	up	yes
Zm00001d017325	0.386846	0	11.9175	0.00164759	0.0360416	up	yes
Zm00001d002710	0.372833	0	11.8643	2.60262e-07	1.82086e-05	up	yes
Zm00001d024234	0.337799	0	11.7219	5.21278e-06	0.000268352	up	yes
Zm00001d032426	0.331288	0	11.6939	3.16733e-05	0.0013168	up	yes
Zm00001d027636	0.326277	0	11.6719	8.82458e-06	0.000423406	up	yes
Zm00001d048374	0.324181	0	11.6626	0.000716292	0.0185953	up	yes
Zm00001d007911	0.323832	0	11.661	0.00103777	0.0252009	up	yes
Zm00001d042779	0.309889	0	11.5975	0.00194132	0.0405938	up	yes
Zm00001d001035	0.273248	0	11.416	0.0019023	0.0399886	up	yes
Zm00001d034150	0.242308	0	11.2426	7.06309e-06	0.000349992	up	yes
Zm00001d022904	0.228299	0	11.1567	0.000993056	0.0244076	up	yes
Zm00001d052551	0.223911	0	11.1287	3.45358e-06	0.000184599	up	yes
Zm00001d007375	0.220967	0	11.1096	0.000119371	0.00416003	up	yes
Zm00001d011134	0.206879	0	11.0146	5.30309e-05	0.00206424	up	yes
Zm00001d021095	0.194246	0	10.9237	0.000840531	0.0212284	up	yes
Zm00001d030914	0.19362	0	10.919	0.000431315	0.012156	up	yes
Zm00001d007489	0.181606	0	10.8266	3.65149e-06	0.000193627	up	yes
Zm00001d035056	0.180605	0	10.8186	4.043e-10	4.65282e-08	up	yes
Zm00001d038740	0.16922	0	10.7247	0.000708636	0.0184432	up	yes
Zm00001d030672	0.164546	0	10.6843	1.14542e-06	6.81308e-05	up	yes
Zm00001d007361	0.15862	0	10.6314	0.00100607	0.0246003	up	yes
Zm00001d003571	0.158376	0	10.6291	0.000429026	0.0121238	up	yes
Zm00001d013735	0.147937	0	10.5308	0.000149013	0.0050352	up	yes
Zm00001d047195	0.127911	0	10.3209	0.00124927	0.0291769	up	yes
Zm00001d019031	0.124028	0	10.2765	1.3898e-08	1.22404e-06	up	yes
Zm00001d010655	0.119933	0	10.228	0.000381058	0.011003	up	yes
Zm00001d002360	0.115633	0	10.1753	0.001457	0.0329386	up	yes
Zm00001d052067	0.104814	0	10.0336	5.26716e-06	0.000270713	up	yes
Zm00001d046582	0.103336	0	10.0131	2.19736e-08	1.85238e-06	up	yes
Zm00001d037038	0.102998	0	10.0084	0.000708974	0.0184432	up	yes
Zm00001d035063	0.101995	0	9.99428	0.00137863	0.0314579	up	yes
Zm00001d015986	14.6273	0.0145	9.9784	1.04348e-56	1.1048e-52	up	yes
Zm00001d003474	0.09225	0	9.84941	0.000921197	0.022967	up	yes
Zm00001d047140	0.0881644	0	9.78405	0.00154134	0.0344288	up	yes
Zm00001d007290	0.0880547	0	9.78226	0.0018797	0.0395659	up	yes
Zm00001d035253	7.38632	0.008819	9.71003	3.98093e-29	3.41746e-26	up	yes
Zm00001d007084	52.8425	0.080175	9.36433	5.47909e-94	1.74032e-89	up	yes
Zm00001d052807	1.57079	0.00239867	9.35504	6.64205e-08	5.05927e-06	up	yes
Zm00001d018189	0.058378	0	9.18928	0.00150413	0.0338355	up	yes
Zm00001d042742	0.0572137	0	9.16022	0.000252063	0.00774477	up	yes
Zm00001d053064	0.0560887	0	9.13157	5.06923e-05	0.00199275	up	yes
Zm00001d036206	0.0528407	0	9.04551	0.00100695	0.0246028	up	yes
Zm00001d018980	0.050751	0	8.98729	0.000886476	0.022241	up	yes
Zm00001d019372	8.29103	0.0219183	8.56327	2.71311e-29	2.3938e-26	up	yes
Zm00001d007166	1.04105	0.00280867	8.53393	1.20952e-08	1.07916e-06	up	yes
Zm00001d029756	51.5049	0.157795	8.35051	6.86059e-32	8.07085e-29	up	yes
Zm00001d021247	1.23951	0.00393168	8.30041	9.49002e-28	7.53579e-25	up	yes
Zm00001d048783	2.64945	0.00876411	8.23987	2.86128e-48	1.00981e-44	up	yes
Zm00001d035405	4.22409	0.018425	7.84083	6.83127e-27	5.04608e-24	up	yes
Zm00001d035145	0.558985	0.00377733	7.2093	1.50375e-13	2.87733e-11	up	yes
Zm00001d029755	9.61677	0.0757533	6.9881	5.74753e-50	2.60798e-46	up	yes
Zm00001d007162	2.87952	0.02377	6.92054	0.00112755	0.026908	up	yes
Zm00001d008209	14.7853	0.154657	6.57895	0.000181981	0.00594676	up	yes
Zm00001d001321	3.88369	0.043069	6.49463	0.000110246	0.00389083	up	yes
Zm00001d003496	1.26833	0.0141877	6.48214	1.26576e-14	2.73498e-12	up	yes
Zm00001d006948	0.563814	0.006444	6.45112	3.40301e-10	3.93053e-08	up	yes
Zm00001d048660	75.979	0.90315	6.39449	1.06488e-21	5.36886e-19	up	yes
Zm00001d024851	0.248721	0.00304167	6.35352	0.000111065	0.00391537	up	yes
Zm00001d052064	1.93026	0.0286	6.07663	3.82533e-11	5.20459e-09	up	yes
Zm00001d003482	28.1079	0.418409	6.06992	1.0254e-09	1.09294e-07	up	yes
Zm00001d039150	0.374362	0.00613967	5.93013	2.04913e-08	1.74494e-06	up	yes
Zm00001d011656	5.36549	0.088583	5.92054	3.10404e-31	3.5212e-28	up	yes
Zm00001d050798	1.28512	0.022096	5.86198	8.09275e-06	0.000394169	up	yes
Zm00001d020997	1.00071	0.0175327	5.83483	1.9325e-08	1.66347e-06	up	yes
Zm00001d018237	0.324459	0.00574033	5.82076	7.16487e-11	9.28889e-09	up	yes
Zm00001d038316	0.499349	0.00966567	5.69104	0.000261976	0.00799342	up	yes
Zm00001d041670	10.8652	0.221231	5.61801	1.58695e-07	1.15083e-05	up	yes
Zm00001d007161	1.04293	0.0227601	5.51799	2.88334e-06	0.00015736	up	yes
Zm00001d024850	0.207046	0.00474233	5.44821	0.000292178	0.00880498	up	yes
Zm00001d052532	0.58158	0.0141947	5.35656	0.000736393	0.0190101	up	yes
Zm00001d016120	1.91271	0.0467273	5.35521	1.46974e-08	1.28251e-06	up	yes
Zm00001d036780	1.08738	0.0271157	5.32559	2.43092e-05	0.00103921	up	yes
Zm00001d052338	1.05895	0.0270803	5.28924	2.17973e-05	0.000947122	up	yes
Zm00001d018029	0.7535	0.0193103	5.28616	8.15712e-07	5.02121e-05	up	yes
Zm00001d006169	1.37764	0.0361317	5.2528	0.000139931	0.00477405	up	yes
Zm00001d052539	1.1417	0.0329907	5.11299	5.57684e-05	0.00215495	up	yes
Zm00001d005892	6.02729	0.175382	5.10294	5.20989e-31	5.70626e-28	up	yes
Zm00001d052372	0.740813	0.0216384	5.09744	2.20445e-08	1.85238e-06	up	yes
Zm00001d002062	1.87179	0.0557467	5.06939	9.65768e-06	0.000456483	up	yes
Zm00001d046161	1.04202	0.034123	4.9325	0.000430898	0.012156	up	yes
Zm00001d034045	0.379807	0.0136124	4.80227	2.77557e-05	0.00116924	up	yes
Zm00001d000805	3.90029	0.145082	4.74864	3.26296e-07	2.22885e-05	up	yes
Zm00001d036726	22.0246	0.950175	4.53478	2.06872e-13	3.82028e-11	up	yes
Zm00001d021205	14.9883	0.661543	4.50186	4.1465e-09	4.05247e-07	up	yes
Zm00001d014253	8.47462	0.383819	4.46465	1.78482e-06	0.000101234	up	yes
Zm00001d021677	6.69674	0.32684	4.3568	8.09115e-10	8.86204e-08	up	yes
Zm00001d034130	12.837	0.627984	4.35343	1.02382e-14	2.25829e-12	up	yes
Zm00001d053746	30.827	1.54469	4.31881	4.23746e-28	3.48676e-25	up	yes
Zm00001d007130	2.58396	0.129972	4.31331	5.16364e-06	0.000266254	up	yes
Zm00001d043318	8.80027	0.454233	4.27604	8.26964e-55	5.25337e-51	up	yes
Zm00001d044387	7.86788	0.426286	4.20608	3.96666e-13	7.15869e-11	up	yes
Zm00001d043663	1.25397	0.069045	4.18282	0.000609171	0.0162188	up	yes
Zm00001d024324	14.3777	0.830734	4.11331	4.2812e-28	3.48676e-25	up	yes
Zm00001d006874	1.38539	0.0809463	4.09719	2.623e-17	7.71428e-15	up	yes
Zm00001d007310	0.398812	0.0236727	4.07441	0.000255307	0.00780697	up	yes
Zm00001d011434	3.28471	0.196132	4.06587	3.36693e-08	2.74215e-06	up	yes
Zm00001d042063	6.01033	0.359642	4.06281	4.38285e-15	1.01615e-12	up	yes
Zm00001d035080	2.7385	0.164682	4.05563	6.34718e-07	4.02406e-05	up	yes
ENSRNA049997515	10.1088	0.61434	4.04043	3.2904e-08	2.69363e-06	up	yes
Zm00001d015340	0.436973	0.026931	4.0202	1.05553e-05	0.000495226	up	yes
zma-MIR408b	11.4211	0.70685	4.01415	8.21106e-09	7.51608e-07	up	yes
Zm00001d034642	3.79684	0.238206	3.99452	2.75277e-11	3.81818e-09	up	yes
Zm00001d007909	1.21638	0.0773773	3.97454	2.19289e-05	0.000950264	up	yes
Zm00001d030304	6.58074	0.431852	3.92964	2.28684e-09	2.29585e-07	up	yes
Zm00001d007269	0.500314	0.0332393	3.91187	0.0018362	0.0388044	up	yes
Zm00001d048263	39.98	2.65926	3.91018	2.75124e-18	9.00903e-16	up	yes
ENSRNA049997133	270.701	18.1358	3.89979	1.11236e-18	4.01498e-16	up	yes
Zm00001d034783	7.07679	0.47798	3.88807	8.82266e-10	9.59706e-08	up	yes
Zm00001d051907	0.609086	0.0412607	3.88381	2.89984e-06	0.000157989	up	yes
Zm00001d012939	1.63625	0.111818	3.87117	0.000248753	0.00766357	up	yes
Zm00001d007175	28.6788	1.98185	3.85506	4.19337e-18	1.34539e-15	up	yes
Zm00001d021208	39.7238	2.75433	3.85023	2.63181e-08	2.19985e-06	up	yes
Zm00001d033049	3.45152	0.239878	3.84686	2.53516e-07	1.78151e-05	up	yes
Zm00001d039524	63.0909	4.38807	3.84577	3.10108e-14	6.43789e-12	up	yes
Zm00001d043740	4.23085	0.294444	3.84488	9.22947e-10	9.93748e-08	up	yes
Zm00001d026657	20.161	1.4037	3.84426	3.49954e-08	2.82839e-06	up	yes
Zm00001d021816	13.4801	0.944147	3.83567	4.19813e-22	2.18598e-19	up	yes
Zm00001d052192	8.19819	0.582276	3.81553	1.0909e-20	4.81256e-18	up	yes
Zm00001d043741	0.720856	0.0513463	3.81138	1.35145e-10	1.67028e-08	up	yes
Zm00001d047864	2.64063	0.191613	3.78462	0.0018495	0.0390597	up	yes
Zm00001d049629	2.011	0.14623	3.7816	3.22848e-06	0.000173839	up	yes
Zm00001d051468	27.9188	2.05088	3.76692	6.78141e-19	2.50463e-16	up	yes
Zm00001d011752	1.68547	0.12405	3.76416	0.000412387	0.0117162	up	yes
Zm00001d031811	0.560403	0.0419417	3.74001	0.000215731	0.0068114	up	yes
Zm00001d033957	14.5004	1.11551	3.70032	6.22573e-13	1.06891e-10	up	yes
Zm00001d048841	9.50348	0.731992	3.69856	1.1367e-11	1.64113e-09	up	yes
Zm00001d010630	4.38018	0.337573	3.69772	1.4438e-18	5.03951e-16	up	yes
Zm00001d004380	6.5803	0.512988	3.68116	2.90806e-37	5.43345e-34	up	yes
Zm00001d047345	14.8742	1.18099	3.65475	3.65856e-12	5.56014e-10	up	yes
Zm00001d035306	7.35598	0.592281	3.63456	2.3927e-17	7.10275e-15	up	yes
Zm00001d031796	23.1336	1.87845	3.62238	3.38813e-05	0.00139581	up	yes
Zm00001d027901	111.731	9.10216	3.61768	1.6218e-42	4.29277e-39	up	yes
Zm00001d017243	2.6795	0.220192	3.60513	4.24975e-09	4.14064e-07	up	yes
ENSRNA049997441	11.0716	0.97529	3.50489	0.000147521	0.00500075	up	yes
Zm00001d048710	127.843	11.3748	3.49046	1.08768e-08	9.78694e-07	up	yes
zma-MIR398b	11.8951	1.06282	3.4844	0.000190926	0.00616299	up	yes
Zm00001d018288	2.57647	0.232067	3.47278	2.40619e-13	4.41778e-11	up	yes
Zm00001d018195	8.4364	0.769028	3.45552	8.55248e-16	2.22666e-13	up	yes
Zm00001d013313	19.5398	1.80262	3.43825	0.000157179	0.00524421	up	yes
Zm00001d053995	3.65678	0.33968	3.42832	6.90818e-09	6.45366e-07	up	yes
Zm00001d033389	34.9051	3.39922	3.36016	3.95495e-14	7.95071e-12	up	yes
Zm00001d018819	4.73788	0.473331	3.32332	4.99604e-07	3.25183e-05	up	yes
Zm00001d035684	16.9592	1.70242	3.31641	1.37523e-07	1.00648e-05	up	yes
Zm00001d022435	52.2844	5.28622	3.30607	6.1328e-11	8.04943e-09	up	yes
Zm00001d048644	3.66806	0.376119	3.28576	0.000228749	0.00717175	up	yes
Zm00001d009985	43.4145	4.46712	3.28076	5.49846e-19	2.05468e-16	up	yes
Zm00001d052513	1.34198	0.139542	3.26559	1.28577e-06	7.59105e-05	up	yes
Zm00001d052206	24.4337	2.54603	3.26255	5.73657e-08	4.41956e-06	up	yes
Zm00001d012321	25.297	2.65212	3.25375	2.34548e-14	4.93374e-12	up	yes
Zm00001d003903	9.84208	1.03398	3.25076	2.43395e-13	4.44308e-11	up	yes
Zm00001d018181	60.6623	6.48348	3.22596	3.6444e-07	2.45248e-05	up	yes
Zm00001d017612	22.9277	2.48898	3.20347	2.43228e-44	7.02333e-41	up	yes
Zm00001d011654	2.84193	0.310783	3.19289	7.3953e-09	6.86833e-07	up	yes
Zm00001d040148	26.3076	2.95449	3.1545	7.90592e-15	1.80659e-12	up	yes
Zm00001d033050	38.5113	4.34263	3.14864	1.75217e-10	2.11613e-08	up	yes
Zm00001d002592	11.9553	1.35358	3.14279	1.90045e-29	1.77541e-26	up	yes
Zm00001d006343	2.48683	0.28649	3.11775	6.08371e-08	4.66756e-06	up	yes
Zm00001d012505	3.0285	0.349229	3.11636	1.14597e-09	1.21332e-07	up	yes
Zm00001d038665	0.522917	0.060329	3.11566	0.00113881	0.0270748	up	yes
Zm00001d008756	28.7088	3.33221	3.10694	3.94614e-56	3.13353e-52	up	yes
Zm00001d002735	6.61266	0.77153	3.09944	1.23938e-47	3.93665e-44	up	yes
Zm00001d048705	199.84	23.4483	3.09129	2.22938e-08	1.86838e-06	up	yes
Zm00001d021576	17.6768	2.11333	3.06426	7.54271e-09	6.98481e-07	up	yes
Zm00001d024522	112.501	13.4852	3.06048	2.63052e-05	0.00111852	up	yes
Zm00001d008073	4.19101	0.505761	3.05077	0.000190358	0.00616299	up	yes
Zm00001d050689	5.87497	0.715103	3.03836	9.03233e-19	3.29763e-16	up	yes
Zm00001d016719	25.4715	3.13212	3.02367	1.2549e-12	2.03365e-10	up	yes
Zm00001d042758	4.58144	0.564351	3.02114	1.55612e-11	2.23652e-09	up	yes
Zm00001d007910	0.59004	0.073018	3.01449	0.00168589	0.0364774	up	yes
Zm00001d016401	12.2858	1.54389	2.99235	8.37168e-05	0.0030848	up	yes
Zm00001d002364	17.5272	2.20863	2.98837	1.24619e-08	1.10566e-06	up	yes
Zm00001d021900	1.76912	0.224017	2.98135	2.39542e-18	8.00902e-16	up	yes
Zm00001d022720	0.373842	0.0473873	2.97986	0.00166983	0.036303	up	yes
Zm00001d023342	10.3088	1.31358	2.9723	1.71911e-20	7.09145e-18	up	yes
Zm00001d029356	8.19922	1.04834	2.96739	2.65094e-32	3.23853e-29	up	yes
Zm00001d040460	3.27565	0.420945	2.96008	9.00909e-09	8.17588e-07	up	yes
Zm00001d015227	2.70996	0.350815	2.94949	9.59251e-09	8.68054e-07	up	yes
Zm00001d016947	12.9157	1.67345	2.94824	6.9581e-06	0.000345869	up	yes
Zm00001d001907	14.2561	1.85623	2.94114	2.32567e-12	3.60343e-10	up	yes
Zm00001d009705	1.30286	0.170964	2.92992	9.7926e-05	0.00353056	up	yes
Zm00001d043706	17.2108	2.26216	2.92754	2.69701e-15	6.48977e-13	up	yes
Zm00001d033385	11.9595	1.57322	2.92637	1.10947e-15	2.79684e-13	up	yes
Zm00001d042541	56.9924	7.57491	2.91147	1.26484e-12	2.03935e-10	up	yes
Zm00001d017101	1.39933	0.186085	2.91071	1.04744e-06	6.26549e-05	up	yes
Zm00001d044752	16.3166	2.18243	2.90233	4.0953e-58	6.50394e-54	up	yes
Zm00001d052518	18.8123	2.52186	2.89912	0.00168464	0.0364753	up	yes
Zm00001d032401	1.27623	0.172222	2.88954	1.34182e-07	9.84297e-06	up	yes
Zm00001d010218	2.36128	0.322368	2.87279	0.000164379	0.00545008	up	yes
Zm00001d017381	8.55596	1.18011	2.85801	3.93177e-08	3.14571e-06	up	yes
Zm00001d051344	0.649655	0.090326	2.84646	0.00023988	0.00745827	up	yes
Zm00001d007726	1.70365	0.238583	2.83606	0.00114187	0.0271273	up	yes
Zm00001d038563	2.03542	0.285139	2.83559	1.59269e-08	1.37644e-06	up	yes
Zm00001d034759	3.30282	0.471557	2.80819	8.8373e-25	5.10362e-22	up	yes
Zm00001d028838	11.8463	1.70188	2.79923	3.25942e-09	3.20523e-07	up	yes
Zm00001d051460	3.82377	0.551009	2.79485	0.00062868	0.0166823	up	yes
Zm00001d011594	0.83758	0.120885	2.79259	0.000114466	0.00402188	up	yes
Zm00001d021207	1.94076	0.28122	2.78685	6.48472e-09	6.11898e-07	up	yes
Zm00001d047055	0.745885	0.108527	2.7809	6.60666e-06	0.000331512	up	yes
Zm00001d037724	52.4384	7.63262	2.78037	1.21902e-20	5.23242e-18	up	yes
Zm00001d014491	168.022	24.6822	2.76711	7.11181e-26	4.80622e-23	up	yes
Zm00001d015025	60.6759	8.9569	2.76005	1.53761e-12	2.44196e-10	up	yes
Zm00001d039099	7.39387	1.12422	2.7174	1.10554e-08	9.91957e-07	up	yes
Zm00001d043742	1.30699	0.19939	2.71258	0.00162825	0.0357525	up	yes
Zm00001d018107	60.3621	9.22991	2.70925	3.53972e-08	2.8536e-06	up	yes
Zm00001d021665	15.6866	2.40247	2.70695	1.27494e-09	1.3365e-07	up	yes
Zm00001d032102	25.2474	3.87569	2.70361	1.68437e-17	5.09531e-15	up	yes
Zm00001d035172	2.46269	0.381255	2.69141	3.80389e-20	1.52941e-17	up	yes
Zm00001d010832	2.06587	0.320451	2.68857	6.81689e-05	0.00257461	up	yes
Zm00001d025141	22.3763	3.49439	2.67886	3.43123e-12	5.23972e-10	up	yes
Zm00001d032120	52.458	8.22981	2.67223	1.60701e-21	7.85285e-19	up	yes
Zm00001d003463	2.48518	0.392082	2.66412	6.01898e-06	0.000304428	up	yes
Zm00001d052205	4.01073	0.634161	2.66094	6.98719e-13	1.18681e-10	up	yes
Zm00001d014493	13.3261	2.12083	2.65155	7.39717e-05	0.00277071	up	yes
Zm00001d009328	12.8931	2.05645	2.64837	6.62926e-12	9.74838e-10	up	yes
Zm00001d000607	14.0522	2.26802	2.63129	9.8794e-05	0.00354977	up	yes
Zm00001d042540	214.015	34.6771	2.62566	0.000366754	0.010681	up	yes
Zm00001d038780	37.3924	6.06111	2.62509	2.85575e-48	1.00981e-44	up	yes
Zm00001d052089	1.42862	0.231902	2.62304	0.000171931	0.00565912	up	yes
Zm00001d044769	130.056	21.4863	2.59764	7.87168e-08	5.95305e-06	up	yes
Zm00001d012641	7.51816	1.24227	2.5974	2.63932e-16	7.10447e-14	up	yes
Zm00001d025533	1.26854	0.209907	2.59534	4.92754e-06	0.000255741	up	yes
Zm00001d007015	1.87762	0.310795	2.59487	8.27156e-06	0.000400502	up	yes
Zm00001d028374	5.52648	0.915226	2.59416	1.1208e-06	6.67919e-05	up	yes
Zm00001d039988	0.614741	0.101925	2.59247	0.000930422	0.0231244	up	yes
Zm00001d043701	4.55145	0.758566	2.58498	3.68928e-07	2.47743e-05	up	yes
Zm00001d048558	18.3721	3.09768	2.56826	2.64376e-10	3.11014e-08	up	yes
Zm00001d052530	15.102	2.54652	2.56815	0.0015397	0.0344288	up	yes
Zm00001d010840	460.063	77.7841	2.56429	0.000657017	0.0173473	up	yes
Zm00001d043209	3.00766	0.510923	2.55747	1.13522e-05	0.000526303	up	yes
Zm00001d027098	2.93553	0.500425	2.55239	0.000517141	0.0140874	up	yes
Zm00001d052008	11.8727	2.02606	2.55089	7.77542e-09	7.15857e-07	up	yes
Zm00001d052152	4.62215	0.792415	2.54424	0.000431006	0.012156	up	yes
Zm00001d036003	21.901	3.75555	2.5439	0.000999715	0.0245093	up	yes
Zm00001d013834	14.0236	2.41219	2.53944	5.12884e-51	2.71512e-47	up	yes
Zm00001d014244	2.54977	0.443454	2.52351	3.44243e-15	8.13771e-13	up	yes
Zm00001d006493	10.0854	1.75422	2.52337	5.63785e-09	5.36153e-07	up	yes
Zm00001d028303	3.41638	0.598248	2.51365	1.9014e-07	1.36639e-05	up	yes
Zm00001d038471	23.9296	4.33448	2.46486	3.86818e-15	9.03419e-13	up	yes
Zm00001d023693	15.772	2.87708	2.45469	1.05719e-05	0.000495274	up	yes
Zm00001d012976	1.41817	0.260282	2.44588	3.7807e-07	2.53347e-05	up	yes
Zm00001d017084	8.9751	1.65021	2.44328	7.99485e-09	7.33932e-07	up	yes
Zm00001d053815	3.77653	0.695335	2.44128	4.03988e-05	0.00163672	up	yes
Zm00001d052716	0.938134	0.173199	2.43737	0.00130978	0.0302365	up	yes
Zm00001d011079	32.1658	5.96058	2.43201	5.71415e-14	1.13437e-11	up	yes
Zm00001d003533	34.2157	6.3474	2.43042	1.01247e-27	7.84365e-25	up	yes
Zm00001d038065	9.12226	1.69275	2.43002	6.72463e-13	1.14836e-10	up	yes
Zm00001d006875	71.4074	13.3736	2.41668	0.0014763	0.0332565	up	yes
Zm00001d051128	4.89217	0.928394	2.39767	1.73167e-09	1.76858e-07	up	yes
Zm00001d039833	44.3522	8.42667	2.39597	0.00238865	0.0481369	up	yes
Zm00001d028154	2.68304	0.511001	2.39247	1.33963e-05	0.000607868	up	yes
Zm00001d052277	2.71426	0.517863	2.38992	3.13789e-11	4.33342e-09	up	yes
Zm00001d034453	29.9571	5.73003	2.38628	1.97617e-09	2.00541e-07	up	yes
Zm00001d034058	0.113416	0.0217937	2.37964	0.00220813	0.045104	up	yes
Zm00001d016379	109.621	21.135	2.37482	8.61067e-24	4.79826e-21	up	yes
Zm00001d011451	4.948	0.957921	2.36887	0.000404512	0.0115349	up	yes
Zm00001d022451	26.414	5.12215	2.36648	1.00206e-26	6.91924e-24	up	yes
Zm00001d007264	1.87976	0.365897	2.36104	0.000473561	0.0131254	up	yes
Zm00001d010956	21.6462	4.23539	2.35354	9.08697e-10	9.82817e-08	up	yes
Zm00001d003538	28.0609	5.49733	2.35176	8.72973e-06	0.000419489	up	yes
Zm00001d041794	171.826	33.8973	2.34171	0.00038166	0.011003	up	yes
Zm00001d047017	9.21749	1.81843	2.34168	6.98973e-05	0.00263363	up	yes
Zm00001d039301	1.82081	0.359539	2.34036	1.19111e-05	0.000548308	up	yes
Zm00001d008381	1.6623	0.328446	2.33945	0.00137557	0.0314106	up	yes
Zm00001d029955	5.30758	1.05282	2.3338	6.43032e-10	7.14147e-08	up	yes
Zm00001d038793	2.75423	0.548373	2.32842	0.000685082	0.0179392	up	yes
Zm00001d045460	37.8469	7.59845	2.3164	9.95945e-27	6.91924e-24	up	yes
Zm00001d037680	5.13387	1.03139	2.31546	6.61296e-05	0.00250953	up	yes
Zm00001d013003	91.4299	18.442	2.30967	5.91506e-13	1.02667e-10	up	yes
Zm00001d049060	28.999	5.88526	2.30082	4.85725e-08	3.80382e-06	up	yes
Zm00001d033024	12.0409	2.45696	2.293	0.00106674	0.0257894	up	yes
Zm00001d011687	1.42906	0.294246	2.27998	4.35277e-08	3.44781e-06	up	yes
Zm00001d020137	74.3172	15.411	2.26974	3.90764e-14	7.90562e-12	up	yes
Zm00001d042963	18.6934	3.87852	2.26895	0.000121028	0.00420593	up	yes
Zm00001d005454	529.825	109.958	2.26857	0.000299733	0.00900703	up	yes
Zm00001d021977	7.25931	1.50671	2.26843	0.00112382	0.0268391	up	yes
Zm00001d029708	18.995	3.95657	2.26329	4.99105e-06	0.000258194	up	yes
Zm00001d016948	11.8006	2.46504	2.25918	0.000597602	0.0159778	up	yes
Zm00001d013163	32.6224	6.81584	2.2589	2.46739e-29	2.23919e-26	up	yes
Zm00001d044300	67.5353	14.182	2.25158	9.44073e-13	1.5457e-10	up	yes
Zm00001d031745	1.95117	0.409976	2.25073	0.00098849	0.024358	up	yes
Zm00001d021791	8.01647	1.68741	2.24816	5.47366e-05	0.00212283	up	yes
Zm00001d009939	18.0931	3.842	2.23551	0.000754249	0.0193985	up	yes
Zm00001d048208	19.4551	4.1858	2.21657	1.21923e-14	2.65249e-12	up	yes
Zm00001d007718	114.873	24.8104	2.21102	1.33111e-15	3.30583e-13	up	yes
Zm00001d003048	5.31648	1.15184	2.20653	1.04761e-10	1.32571e-08	up	yes
Zm00001d035981	2.5144	0.549116	2.19503	0.0010011	0.0245166	up	yes
Zm00001d024470	0.263598	0.0576168	2.19378	8.49803e-07	5.21086e-05	up	yes
Zm00001d027899	12.8038	2.82158	2.18199	1.26926e-09	1.33495e-07	up	yes
Zm00001d024458	3.96587	0.876301	2.17814	0.000108998	0.00385964	up	yes
Zm00001d006885	24.8586	5.51785	2.17156	1.02465e-20	4.58394e-18	up	yes
Zm00001d034031	48.8389	10.8692	2.16778	1.632e-35	2.46843e-32	up	yes
Zm00001d017699	26.3786	5.87704	2.16621	6.88202e-11	8.95875e-09	up	yes
Zm00001d043062	33.9515	7.5871	2.16185	3.65423e-21	1.73238e-18	up	yes
Zm00001d009084	56.8388	12.7812	2.15285	1.6793e-10	2.04366e-08	up	yes
Zm00001d007366	108.857	24.5278	2.14995	5.74655e-08	4.41956e-06	up	yes
Zm00001d039919	1.87621	0.422842	2.14963	4.94167e-08	3.84711e-06	up	yes
Zm00001d020332	28.8353	6.55651	2.13684	1.67803e-06	9.6035e-05	up	yes
Zm00001d040048	13.5626	3.09075	2.13361	3.87451e-11	5.23685e-09	up	yes
Zm00001d015614	10.1785	2.32255	2.13174	8.9549e-09	8.14999e-07	up	yes
Zm00001d009309	118.087	27.0052	2.12854	0.000156092	0.00521891	up	yes
Zm00001d007096	17.1772	3.94009	2.1242	5.42407e-40	1.14857e-36	up	yes
Zm00001d006638	1.28449	0.295812	2.11845	0.000603921	0.0161196	up	yes
Zm00001d044442	17.4638	4.02813	2.11618	2.14343e-07	1.51969e-05	up	yes
Zm00001d027370	8.53241	1.96983	2.11488	3.4662e-05	0.00142612	up	yes
Zm00001d048135	36.9233	8.5927	2.10335	1.18817e-09	1.25382e-07	up	yes
Zm00001d043060	4.43398	1.03541	2.0984	0.00059564	0.0159388	up	yes
Zm00001d006330	27.3413	6.4244	2.08945	5.82339e-11	7.67504e-09	up	yes
Zm00001d026942	3.1364	0.745045	2.07371	9.57906e-05	0.00346143	up	yes
Zm00001d028630	14.03	3.33349	2.07341	2.47906e-06	0.000137182	up	yes
Zm00001d004416	0.341584	0.0816566	2.0646	0.000886375	0.022241	up	yes
Zm00001d025319	3.50714	0.838573	2.06429	2.0881e-05	0.000912303	up	yes
Zm00001d050241	9.28245	2.22928	2.05793	2.20324e-08	1.85238e-06	up	yes
Zm00001d027522	2.54204	0.61065	2.05757	0.000321791	0.00952569	up	yes
Zm00001d002759	64.7056	15.5527	2.05672	3.20589e-15	7.65629e-13	up	yes
Zm00001d011403	0.906919	0.218141	2.05571	0.00100324	0.0245499	up	yes
Zm00001d048702	279.919	67.371	2.05481	1.78875e-05	0.000794631	up	yes
Zm00001d007889	12.7442	3.07966	2.04899	9.34718e-26	6.1853e-23	up	yes
Zm00001d043752	21.6906	5.25951	2.04407	9.68898e-14	1.88804e-11	up	yes
Zm00001d001694	1.64146	0.399052	2.04033	0.00173962	0.0373097	up	yes
Zm00001d040032	37.0502	9.03512	2.03586	4.68736e-05	0.00186106	up	yes
Zm00001d009487	31.614	7.71917	2.03405	4.93133e-05	0.00194576	up	yes
Zm00001d004664	46.2063	11.2864	2.0335	3.16712e-05	0.0013168	up	yes
Zm00001d043830	13.7503	3.37346	2.02716	1.20724e-14	2.64452e-12	up	yes
Zm00001d051617	3.95273	0.970306	2.02634	8.39769e-05	0.0030908	up	yes
Zm00001d003504	35.0834	8.67216	2.01632	6.1363e-14	1.2106e-11	up	yes
Zm00001d003272	3.36588	0.833203	2.01424	0.000215178	0.00680204	up	yes
Zm00001d029668	17.1324	4.2566	2.00895	5.74918e-07	3.68912e-05	up	yes
Zm00001d029667	17.3375	4.30909	2.00844	6.27766e-07	3.98795e-05	up	yes
Zm00001d006170	10.5457	2.63566	2.00042	0.00102121	0.0248747	up	yes
