# Supplementary material for: Morphological characterization and transcriptome analysis of leaf angle mutant bhlh112 in maize [Zea mays L.]
Source: Front Plant Sci. 2022 Oct 7;13:995815. doi: 10.3389/fpls.2022.995815 (PMC9585351; doi:10.3389/fpls.2022.995815)
Supplement: Supplementary file 2 [file Table_2.xlsx]

## Sheet: DOWN
Supplementary Table S2 DEGs regulated leaf angle under ABA treatment group
gene_id	FPKM.b112_A	FPKM.WT_A	log2(fc) (b112_A VS B73_A)	pval (b112_A VS B73_A)	qval (b112_A VS B73_A)	regulation	significant
Zm00001d023657	0	52.2258	-18.9944	2.84391e-23	2.11645e-20	down	yes
Zm00001d024980	0	24.1517	-17.8818	0.000769682	0.014468	down	yes
Zm00001d052201	0	21.8204	-17.7353	1.33456e-27	1.36563e-24	down	yes
Zm00001d009902	0	18.6388	-17.5079	4.71256e-23	3.28325e-20	down	yes
Zm00001d049263	0	14.9927	-17.1939	7.10824e-17	2.15518e-14	down	yes
Zm00001d040952	0	14.7422	-17.1696	7.30687e-29	7.97545e-26	down	yes
Zm00001d047778	0	14.7197	-17.1674	3.06738e-22	1.86003e-19	down	yes
Zm00001d011059	0	13.9468	-17.0896	0.000714871	0.0136492	down	yes
Zm00001d051745	0	12.9331	-16.9807	5.68818e-19	2.35772e-16	down	yes
Zm00001d043260	0	12.4397	-16.9246	2.91989e-15	6.87855e-13	down	yes
Zm00001d040326	0	12.4031	-16.9203	3.75046e-22	2.23288e-19	down	yes
Zm00001d043124	0	11.6326	-16.8278	3.05661e-27	3.03299e-24	down	yes
Zm00001d003452	0	11.1186	-16.7626	1.9206e-26	1.79686e-23	down	yes
Zm00001d003118	0	11.0281	-16.7508	2.23616e-22	1.40813e-19	down	yes
Zm00001d015498	0	10.9759	-16.744	2.79078e-22	1.72423e-19	down	yes
Zm00001d029769	0	10.9509	-16.7407	3.86339e-19	1.64294e-16	down	yes
Zm00001d010554	0	10.8782	-16.7311	3.13259e-23	2.27948e-20	down	yes
Zm00001d036129	0	10.7843	-16.7186	2.60763e-25	2.13468e-22	down	yes
Zm00001d031037	0	10.5622	-16.6885	0.00195396	0.0302248	down	yes
Zm00001d030821	0	10.0913	-16.6228	6.44083e-06	0.000261021	down	yes
Zm00001d028839	0	10.0079	-16.6108	5.12492e-16	1.31106e-13	down	yes
Zm00001d051713	0	8.82914	-16.43	1.48583e-21	8.37277e-19	down	yes
Zm00001d010393	0	8.6023	-16.3924	8.25086e-25	6.58962e-22	down	yes
Zm00001d007132	0	8.57959	-16.3886	1.9485e-22	1.25105e-19	down	yes
Zm00001d009180	0	8.2771	-16.3368	3.61058e-08	2.38543e-06	down	yes
Zm00001d050770	0	7.85799	-16.2619	1.50861e-21	8.37277e-19	down	yes
Zm00001d022729	0	7.76523	-16.2447	1.87458e-19	8.29501e-17	down	yes
Zm00001d045759	0	7.71357	-16.2351	2.66758e-23	2.0314e-20	down	yes
Zm00001d010154	0	7.5598	-16.2061	2.57757e-05	0.00086931	down	yes
Zm00001d028083	0	7.41672	-16.1785	2.28088e-20	1.02311e-17	down	yes
Zm00001d053226	0	6.79299	-16.0518	0.00347356	0.046692	down	yes
Zm00001d039497	0	6.45755	-15.9787	7.22883e-21	3.481e-18	down	yes
Zm00001d003090	0	6.27303	-15.9369	1.66807e-08	1.16712e-06	down	yes
Zm00001d018546	0	6.08859	-15.8938	5.41535e-15	1.23143e-12	down	yes
Zm00001d046044	0	6.04238	-15.8828	6.27474e-19	2.53662e-16	down	yes
Zm00001d049250	0	5.81985	-15.8287	1.89005e-20	8.71687e-18	down	yes
Zm00001d018955	0	5.76523	-15.8151	4.62283e-10	4.43914e-08	down	yes
Zm00001d049673	0	5.65396	-15.787	1.06674e-16	3.14688e-14	down	yes
Zm00001d052131	0	5.62592	-15.7798	3.24417e-14	6.4382e-12	down	yes
Zm00001d043122	0	5.54464	-15.7588	5.53918e-15	1.24233e-12	down	yes
Zm00001d013713	0	5.52205	-15.7529	1.49093e-21	8.37277e-19	down	yes
Zm00001d044714	0	5.19948	-15.6661	4.42054e-09	3.55652e-07	down	yes
Zm00001d045631	0	5.14843	-15.6518	0.00371396	0.0490759	down	yes
Zm00001d000677	0	5.14291	-15.6503	3.22272e-11	3.70273e-09	down	yes
Zm00001d039494	0	5.12632	-15.6456	9.23365e-18	3.0541e-15	down	yes
Zm00001d010510	0	5.10225	-15.6388	2.06431e-20	9.38832e-18	down	yes
Zm00001d045237	0	5.04138	-15.6215	0.00233864	0.0344639	down	yes
Zm00001d045718	0	5.01725	-15.6146	1.29848e-17	4.16851e-15	down	yes
Zm00001d040852	0	4.92753	-15.5886	1.8611e-18	6.8474e-16	down	yes
Zm00001d029893	0	4.92284	-15.5872	0.000451458	0.00945203	down	yes
Zm00001d048077	0	4.91849	-15.5859	1.17594e-10	1.22631e-08	down	yes
Zm00001d008773	0	4.82126	-15.5571	5.67299e-23	3.87004e-20	down	yes
Zm00001d043750	0	4.78844	-15.5473	1.72254e-18	6.48328e-16	down	yes
Zm00001d010739	0	4.70355	-15.5215	6.94086e-13	1.07715e-10	down	yes
Zm00001d029316	0	4.67925	-15.514	0.00202569	0.0309959	down	yes
Zm00001d038694	0	4.61982	-15.4956	1.4141e-14	3.00679e-12	down	yes
Zm00001d040069	0	4.53747	-15.4696	7.18703e-14	1.35252e-11	down	yes
Zm00001d001770	0	4.46601	-15.4467	7.48937e-19	2.91952e-16	down	yes
Zm00001d035794	0	4.46454	-15.4462	2.58009e-12	3.64159e-10	down	yes
Zm00001d034171	0	4.31001	-15.3954	6.83849e-12	8.85096e-10	down	yes
Zm00001d021608	0	4.13637	-15.3361	2.61903e-15	6.30588e-13	down	yes
Zm00001d032371	0	4.12074	-15.3306	1.62346e-21	8.86005e-19	down	yes
Zm00001d024053	0	3.8583	-15.2357	5.18617e-22	3.03252e-19	down	yes
Zm00001d035715	0	3.66002	-15.1596	0.00250846	0.0364255	down	yes
Zm00001d018317	0	3.5518	-15.1163	3.15193e-15	7.26831e-13	down	yes
Zm00001d046121	0	3.4594	-15.0782	1.15202e-16	3.33831e-14	down	yes
Zm00001d001926	0	3.41237	-15.0585	3.94523e-16	1.02529e-13	down	yes
Zm00001d040216	0	3.37782	-15.0438	7.26283e-17	2.18185e-14	down	yes
Zm00001d032255	0	3.33788	-15.0266	4.85559e-10	4.62198e-08	down	yes
Zm00001d030930	0	3.28781	-15.0048	1.16955e-10	1.22631e-08	down	yes
Zm00001d036773	0	3.27352	-14.9986	1.44994e-10	1.48835e-08	down	yes
Zm00001d044977	0	3.20331	-14.9673	9.21096e-12	1.16453e-09	down	yes
Zm00001d015538	0	3.17005	-14.9522	2.16961e-14	4.44025e-12	down	yes
Zm00001d010511	0	3.07688	-14.9092	1.97134e-13	3.39745e-11	down	yes
Zm00001d050548	0	3.07156	-14.9067	0.00376903	0.0495451	down	yes
Zm00001d041861	0	3.05844	-14.9005	0.00287355	0.0404186	down	yes
Zm00001d002863	0	2.98759	-14.8667	3.03327e-15	7.04429e-13	down	yes
Zm00001d022794	0	2.962	-14.8543	4.23634e-11	4.79996e-09	down	yes
Zm00001d039288	0	2.91049	-14.829	2.97734e-13	4.99965e-11	down	yes
Zm00001d014401	0	2.77993	-14.7628	4.91606e-09	3.90101e-07	down	yes
Zm00001d021814	0	2.76124	-14.753	6.55617e-12	8.58728e-10	down	yes
Zm00001d040375	0	2.7276	-14.7353	9.03527e-09	6.76125e-07	down	yes
Zm00001d045787	0	2.70214	-14.7218	0.00360383	0.0479277	down	yes
Zm00001d045876	0	2.68738	-14.7139	1.25631e-17	4.07307e-15	down	yes
Zm00001d007131	0	2.67256	-14.7059	2.84683e-15	6.75503e-13	down	yes
Zm00001d019632	0	2.63563	-14.6859	1.5873e-13	2.76469e-11	down	yes
Zm00001d036913	0	2.5992	-14.6658	7.44305e-19	2.91952e-16	down	yes
Zm00001d041784	0	2.59614	-14.6641	2.59383e-10	2.54296e-08	down	yes
Zm00001d021538	0	2.52506	-14.624	6.2305e-10	5.79595e-08	down	yes
Zm00001d052319	0	2.45808	-14.5852	4.7126e-13	7.56442e-11	down	yes
Zm00001d043379	0	2.45625	-14.5842	5.29463e-09	4.16761e-07	down	yes
Zm00001d040209	0	2.42066	-14.5631	1.37292e-12	2.04346e-10	down	yes
Zm00001d016235	0	2.4009	-14.5513	3.14698e-11	3.64127e-09	down	yes
Zm00001d023993	0	2.34479	-14.5172	3.90214e-12	5.32398e-10	down	yes
Zm00001d032879	0	2.27796	-14.4755	8.72311e-13	1.32855e-10	down	yes
Zm00001d051919	0	2.26253	-14.4657	3.16703e-09	2.60564e-07	down	yes
Zm00001d002208	0	2.20671	-14.4296	1.12587e-17	3.68667e-15	down	yes
Zm00001d046043	0	2.16714	-14.4035	9.04391e-09	6.76125e-07	down	yes
Zm00001d027911	0	2.16253	-14.4004	1.01282e-09	9.11124e-08	down	yes
Zm00001d044237	0	2.16044	-14.399	0.000865137	0.015867	down	yes
Zm00001d017828	0	2.15598	-14.3961	1.37863e-09	1.19427e-07	down	yes
Zm00001d052183	0	2.13807	-14.384	3.54065e-14	6.98425e-12	down	yes
Zm00001d031733	0	2.13191	-14.3799	1.16696e-13	2.13475e-11	down	yes
Zm00001d043341	0	2.10451	-14.3612	1.93441e-16	5.46054e-14	down	yes
Zm00001d028434	0	2.07189	-14.3387	4.88885e-10	4.64016e-08	down	yes
Zm00001d011294	0	2.03065	-14.3097	2.45366e-16	6.7517e-14	down	yes
Zm00001d034216	0	2.03044	-14.3095	1.18261e-08	8.56741e-07	down	yes
Zm00001d025140	0	2.01871	-14.3011	7.88176e-12	1.01211e-09	down	yes
Zm00001d002110	0	1.98321	-14.2755	2.53717e-12	3.59652e-10	down	yes
Zm00001d018152	0	1.97224	-14.2675	6.16541e-10	5.75175e-08	down	yes
Zm00001d038017	0	1.94216	-14.2454	3.92664e-09	3.16694e-07	down	yes
Zm00001d027175	0	1.92725	-14.2343	5.53007e-15	1.24233e-12	down	yes
Zm00001d019794	0	1.90387	-14.2166	1.0856e-12	1.64574e-10	down	yes
Zm00001d044020	0	1.89781	-14.212	1.2329e-13	2.24285e-11	down	yes
Zm00001d004869	0	1.87005	-14.1908	1.44793e-10	1.48835e-08	down	yes
Zm00001d032729	0	1.8608	-14.1836	2.19792e-13	3.76811e-11	down	yes
Zm00001d029592	0	1.86021	-14.1832	4.76145e-09	3.80277e-07	down	yes
Zm00001d044983	0	1.77656	-14.1168	2.72198e-15	6.50593e-13	down	yes
Zm00001d051342	0	1.77517	-14.1157	7.24512e-05	0.00208289	down	yes
Zm00001d029743	0	1.77447	-14.1151	3.34875e-13	5.56624e-11	down	yes
Zm00001d033017	0	1.76955	-14.1111	1.54382e-10	1.57484e-08	down	yes
Zm00001d028394	0	1.70795	-14.06	1.32663e-10	1.3747e-08	down	yes
Zm00001d033115	0	1.70196	-14.0549	4.83299e-07	2.58167e-05	down	yes
Zm00001d030183	0	1.68935	-14.0442	3.93742e-19	1.65296e-16	down	yes
Zm00001d037940	0	1.68835	-14.0433	4.94846e-14	9.47588e-12	down	yes
Zm00001d011009	0	1.68142	-14.0374	1.16451e-09	1.03902e-07	down	yes
Zm00001d035209	0	1.64755	-14.008	1.64381e-18	6.25889e-16	down	yes
Zm00001d004475	0	1.64648	-14.0071	3.51518e-06	0.00015066	down	yes
Zm00001d007056	0	1.62215	-13.9856	1.1337e-16	3.31454e-14	down	yes
Zm00001d019793	0	1.61997	-13.9837	1.20476e-08	8.68936e-07	down	yes
Zm00001d018551	0	1.6145	-13.9788	2.21287e-10	2.18255e-08	down	yes
Zm00001d021982	0	1.60078	-13.9665	3.66441e-13	6.04315e-11	down	yes
Zm00001d024029	0	1.59647	-13.9626	2.0894e-09	1.75429e-07	down	yes
Zm00001d015278	0	1.58715	-13.9542	4.00271e-14	7.79182e-12	down	yes
Zm00001d003969	0	1.57958	-13.9473	1.66849e-10	1.68625e-08	down	yes
Zm00001d047180	0	1.57638	-13.9443	5.2027e-09	4.10512e-07	down	yes
Zm00001d039831	0	1.57092	-13.9393	8.97018e-09	6.7369e-07	down	yes
Zm00001d035316	0	1.56866	-13.9372	3.52378e-16	9.2309e-14	down	yes
Zm00001d046520	0	1.53832	-13.9091	1.40598e-05	0.000513951	down	yes
Zm00001d046181	0	1.53067	-13.9019	3.38641e-09	2.7722e-07	down	yes
Zm00001d046849	0	1.50284	-13.8754	1.90169e-10	1.9043e-08	down	yes
Zm00001d046262	0	1.40551	-13.7788	6.83858e-12	8.85096e-10	down	yes
Zm00001d023295	0	1.39438	-13.7673	0.000210799	0.00504209	down	yes
Zm00001d013718	0	1.38545	-13.7581	3.59813e-15	8.23922e-13	down	yes
Zm00001d019176	0	1.37719	-13.7494	2.14568e-14	4.41888e-12	down	yes
Zm00001d047323	0	1.3687	-13.7405	2.55995e-09	2.13297e-07	down	yes
Zm00001d051798	0	1.32302	-13.6916	0.000330059	0.00736224	down	yes
Zm00001d015055	0	1.28585	-13.6504	8.75251e-09	6.58853e-07	down	yes
Zm00001d003638	0	1.27406	-13.6372	1.04574e-07	6.23727e-06	down	yes
Zm00001d016919	0	1.26932	-13.6318	7.77979e-13	1.19601e-10	down	yes
Zm00001d031482	0	1.2551	-13.6155	3.53583e-09	2.87297e-07	down	yes
Zm00001d009115	0	1.22787	-13.5839	3.06258e-09	2.53243e-07	down	yes
Zm00001d011546	0	1.22635	-13.5821	2.38504e-15	5.78505e-13	down	yes
Zm00001d036871	0	1.22052	-13.5752	3.2656e-11	3.73889e-09	down	yes
Zm00001d036628	0	1.2144	-13.568	1.27275e-09	1.11434e-07	down	yes
Zm00001d043579	0	1.21141	-13.5644	1.78014e-10	1.78806e-08	down	yes
Zm00001d036209	0	1.18107	-13.5278	5.85781e-10	5.4961e-08	down	yes
Zm00001d042401	0	1.1782	-13.5243	1.30715e-12	1.96343e-10	down	yes
Zm00001d035819	0	1.1566	-13.4976	8.24317e-10	7.53974e-08	down	yes
Zm00001d008083	0	1.14404	-13.4818	2.33889e-06	0.000106371	down	yes
Zm00001d040325	0	1.13784	-13.474	1.78203e-15	4.35468e-13	down	yes
Zm00001d017506	0	1.13481	-13.4702	8.49787e-05	0.00238443	down	yes
Zm00001d041174	0	1.12804	-13.4615	6.12041e-06	0.000249891	down	yes
Zm00001d042655	0	1.11684	-13.4471	0.000439388	0.00928242	down	yes
Zm00001d007367	0	1.11286	-13.442	5.43975e-09	4.27157e-07	down	yes
Zm00001d035642	0	1.11132	-13.44	0.00239408	0.0351229	down	yes
Zm00001d013771	0	1.10592	-13.433	9.54241e-10	8.63166e-08	down	yes
Zm00001d003988	0	1.10503	-13.4318	1.60922e-06	7.54927e-05	down	yes
Zm00001d047851	0	1.09926	-13.4242	0.00180141	0.028389	down	yes
Zm00001d015482	0	1.0988	-13.4236	8.28861e-06	0.000327877	down	yes
Zm00001d040115	0	1.09566	-13.4195	3.14798e-06	0.000137808	down	yes
Zm00001d032105	0	1.09385	-13.4171	4.363e-06	0.00018246	down	yes
Zm00001d038564	0	1.07203	-13.3881	2.31308e-06	0.000105343	down	yes
Zm00001d032064	0	1.05296	-13.3622	3.701e-13	6.05946e-11	down	yes
Zm00001d031503	0	1.02875	-13.3286	2.61777e-13	4.4185e-11	down	yes
Zm00001d013560	0	1.02831	-13.328	1.43461e-07	8.40366e-06	down	yes
Zm00001d005599	0	1.02277	-13.3202	3.23605e-14	6.4382e-12	down	yes
Zm00001d021509	0	1.0156	-13.31	2.18588e-08	1.50371e-06	down	yes
Zm00001d002899	0	0.980682	-13.2596	4.21338e-10	4.05786e-08	down	yes
Zm00001d030198	0	0.962842	-13.2331	6.97521e-07	3.5876e-05	down	yes
Zm00001d007616	0	0.961767	-13.2315	6.06087e-09	4.72531e-07	down	yes
Zm00001d053305	0	0.961539	-13.2311	7.28211e-11	7.84383e-09	down	yes
Zm00001d052168	0	0.944871	-13.2059	3.67258e-13	6.04315e-11	down	yes
Zm00001d005337	0	0.94175	-13.2011	1.34434e-08	9.54892e-07	down	yes
Zm00001d047493	0	0.939808	-13.1981	0.0011741	0.0204935	down	yes
Zm00001d015555	0	0.938331	-13.1959	0.000628236	0.0122871	down	yes
Zm00001d046475	0	0.912748	-13.156	2.73252e-11	3.18421e-09	down	yes
Zm00001d009843	0	0.912189	-13.1551	1.11859e-08	8.17597e-07	down	yes
Zm00001d002207	0	0.909478	-13.1508	1.05832e-05	0.000404846	down	yes
Zm00001d025265	0	0.90932	-13.1506	0.0011837	0.020639	down	yes
Zm00001d040590	0	0.904673	-13.1432	0.000404935	0.0086664	down	yes
Zm00001d052589	0	0.904502	-13.1429	4.00876e-16	1.0336e-13	down	yes
Zm00001d045807	0	0.902103	-13.1391	0.00152729	0.025108	down	yes
Zm00001d009070	0	0.894493	-13.1269	0.000777949	0.014577	down	yes
Zm00001d051008	0	0.89174	-13.1224	4.78767e-13	7.64743e-11	down	yes
Zm00001d001823	0	0.887636	-13.1158	1.64415e-08	1.15284e-06	down	yes
Zm00001d025971	0	0.883094	-13.1084	1.45082e-09	1.24039e-07	down	yes
Zm00001d012262	0	0.880028	-13.1033	5.30863e-13	8.39764e-11	down	yes
Zm00001d021431	0	0.878649	-13.1011	9.56894e-05	0.00263086	down	yes
Zm00001d021813	0	0.877492	-13.0992	0.000933674	0.0168447	down	yes
Zm00001d039888	0	0.876926	-13.0982	0.000659622	0.012758	down	yes
Zm00001d042021	0	0.876815	-13.0981	3.65008e-08	2.40487e-06	down	yes
Zm00001d016734	0	0.874899	-13.0949	1.94066e-10	1.92992e-08	down	yes
Zm00001d001029	0	0.870825	-13.0882	2.04707e-06	9.4145e-05	down	yes
Zm00001d052648	0	0.860753	-13.0714	4.98008e-13	7.91615e-11	down	yes
Zm00001d010258	0	0.860328	-13.0707	8.07797e-10	7.40933e-08	down	yes
Zm00001d016333	0	0.851116	-13.0551	1.13971e-11	1.42988e-09	down	yes
Zm00001d035245	0	0.850832	-13.0547	1.39213e-06	6.62575e-05	down	yes
Zm00001d029575	0	0.847847	-13.0496	0.000741557	0.0140526	down	yes
Zm00001d034326	0	0.843344	-13.0419	5.68042e-13	8.94257e-11	down	yes
Zm00001d015219	0	0.83781	-13.0324	9.58011e-11	1.01977e-08	down	yes
Zm00001d038443	0	0.83264	-13.0235	1.37416e-13	2.44549e-11	down	yes
Zm00001d030216	0	0.814676	-12.992	1.06181e-08	7.84051e-07	down	yes
Zm00001d052014	0	0.814311	-12.9914	2.97765e-05	0.00097993	down	yes
Zm00001d035636	0	0.813253	-12.9895	0.000390166	0.00840587	down	yes
Zm00001d031305	0	0.807033	-12.9784	0.000294917	0.00668627	down	yes
Zm00001d011137	0	0.799771	-12.9654	1.10136e-08	8.06798e-07	down	yes
Zm00001d018376	0	0.799662	-12.9652	0.000378199	0.00821229	down	yes
Zm00001d049912	0	0.789443	-12.9466	2.94644e-12	4.10922e-10	down	yes
Zm00001d036288	0	0.784435	-12.9374	0.00371535	0.0490759	down	yes
Zm00001d047158	0	0.782019	-12.933	5.04133e-07	2.68857e-05	down	yes
Zm00001d009642	0	0.781018	-12.9311	0.000597653	0.011832	down	yes
Zm00001d053619	0	0.770477	-12.9115	6.92336e-10	6.40411e-08	down	yes
Zm00001d038992	0	0.769626	-12.9099	4.02516e-13	6.5574e-11	down	yes
Zm00001d012318	0	0.769258	-12.9093	0.00172096	0.0275025	down	yes
Zm00001d041103	0	0.760094	-12.892	0.000494129	0.0101635	down	yes
Zm00001d015419	0	0.753098	-12.8786	6.45885e-09	4.99988e-07	down	yes
Zm00001d037921	0	0.751909	-12.8763	2.683e-08	1.80031e-06	down	yes
Zm00001d051945	0	0.73842	-12.8502	1.4349e-13	2.52611e-11	down	yes
Zm00001d011869	0	0.73803	-12.8495	1.12385e-08	8.19607e-07	down	yes
Zm00001d040289	0	0.736258	-12.846	0.00103126	0.0183116	down	yes
Zm00001d033260	0	0.730102	-12.8339	0.000847202	0.0155677	down	yes
Zm00001d021801	0	0.727912	-12.8295	8.40521e-05	0.00236654	down	yes
Zm00001d009261	0	0.727288	-12.8283	0.00184004	0.0288703	down	yes
Zm00001d013111	0	0.722371	-12.8185	5.60741e-09	4.39269e-07	down	yes
Zm00001d004510	0	0.721951	-12.8177	5.85725e-10	5.4961e-08	down	yes
Zm00001d043792	0	0.708926	-12.7914	0.00207276	0.0315099	down	yes
Zm00001d043793	0	0.707806	-12.7891	0.000420059	0.00894332	down	yes
Zm00001d049033	0	0.703763	-12.7809	9.14658e-06	0.000355706	down	yes
Zm00001d015940	0	0.692827	-12.7583	0.000111253	0.00299588	down	yes
Zm00001d024455	0	0.689109	-12.7505	0.00332868	0.0451522	down	yes
Zm00001d045003	0	0.686896	-12.7459	1.59684e-10	1.62387e-08	down	yes
Zm00001d049733	0	0.685574	-12.7431	2.20947e-08	1.51676e-06	down	yes
Zm00001d030017	0	0.676593	-12.7241	0.00328367	0.0447085	down	yes
Zm00001d012682	0	0.675498	-12.7217	5.40895e-12	7.22922e-10	down	yes
Zm00001d030270	0	0.672918	-12.7162	6.14773e-13	9.63194e-11	down	yes
Zm00001d007245	0	0.67054	-12.7111	0.000451261	0.00945203	down	yes
Zm00001d026057	0	0.669396	-12.7086	1.23926e-08	8.84089e-07	down	yes
Zm00001d051072	0	0.669003	-12.7078	0.00258181	0.0372922	down	yes
Zm00001d042594	0	0.661676	-12.6919	0.000875797	0.0159855	down	yes
Zm00001d000821	0	0.653028	-12.6729	0.002209	0.0330508	down	yes
Zm00001d045132	0	0.650857	-12.6681	0.00133422	0.0226017	down	yes
Zm00001d019805	0	0.649817	-12.6658	4.40152e-08	2.82604e-06	down	yes
Zm00001d039815	0	0.648365	-12.6626	3.47242e-07	1.9046e-05	down	yes
Zm00001d024028	0	0.647322	-12.6603	1.21069e-06	5.86451e-05	down	yes
Zm00001d037070	0	0.642337	-12.6491	0.00226862	0.0337051	down	yes
Zm00001d022051	0	0.634713	-12.6319	0.000367365	0.00803034	down	yes
Zm00001d026818	0	0.63204	-12.6258	0.00113667	0.0199572	down	yes
Zm00001d033384	0	0.631762	-12.6252	2.3232e-05	0.00079825	down	yes
Zm00001d040266	0	0.623246	-12.6056	1.26258e-09	1.1084e-07	down	yes
Zm00001d023924	0	0.621904	-12.6025	0.000234347	0.00549692	down	yes
Zm00001d014905	0	0.620461	-12.5991	0.000837628	0.0154612	down	yes
Zm00001d039388	0	0.618514	-12.5946	0.000737059	0.0139913	down	yes
Zm00001d032446	0	0.616506	-12.5899	0.00201688	0.0308832	down	yes
Zm00001d029693	0	0.610436	-12.5756	4.27292e-05	0.00132748	down	yes
Zm00001d017245	0	0.610167	-12.575	2.25691e-13	3.84908e-11	down	yes
Zm00001d037395	0	0.609912	-12.5744	1.76101e-09	1.49003e-07	down	yes
Zm00001d012357	0	0.609345	-12.573	3.91818e-09	3.16694e-07	down	yes
Zm00001d035174	0	0.608569	-12.5712	7.57955e-09	5.78537e-07	down	yes
Zm00001d025373	0	0.603937	-12.5602	1.05447e-07	6.27793e-06	down	yes
Zm00001d018367	0	0.59652	-12.5424	1.15672e-08	8.39843e-07	down	yes
Zm00001d019389	0	0.595924	-12.5409	0.00215267	0.0324387	down	yes
Zm00001d053366	0	0.589462	-12.5252	4.98617e-11	5.59151e-09	down	yes
Zm00001d039554	0	0.588035	-12.5217	0.000444301	0.00934401	down	yes
Zm00001d003136	0	0.57981	-12.5014	3.72256e-08	2.4477e-06	down	yes
Zm00001d021660	0	0.575984	-12.4918	1.16818e-15	2.89788e-13	down	yes
Zm00001d036341	0	0.574395	-12.4878	0.000372842	0.00811749	down	yes
Zm00001d043079	0	0.573864	-12.4865	5.69554e-07	3.02761e-05	down	yes
Zm00001d014309	0	0.5737	-12.4861	0.000445815	0.00935782	down	yes
Zm00001d052529	0	0.566338	-12.4674	0.000425684	0.00903957	down	yes
Zm00001d031146	0	0.564973	-12.464	0.00209925	0.0318388	down	yes
Zm00001d039757	0	0.564339	-12.4623	5.55424e-10	5.24132e-08	down	yes
Zm00001d006902	0	0.561629	-12.4554	1.36895e-07	8.04779e-06	down	yes
Zm00001d027932	0	0.55977	-12.4506	4.40756e-05	0.00136414	down	yes
Zm00001d050937	0	0.557736	-12.4454	3.89176e-12	5.32398e-10	down	yes
Zm00001d033082	0	0.554618	-12.4373	0.000440702	0.00928537	down	yes
Zm00001d051261	0	0.554265	-12.4364	2.39649e-08	1.63145e-06	down	yes
Zm00001d025074	0	0.552429	-12.4316	1.03298e-06	5.09411e-05	down	yes
Zm00001d004519	0	0.551608	-12.4294	3.75105e-05	0.00119251	down	yes
Zm00001d024164	0	0.546575	-12.4162	0.000206618	0.00496263	down	yes
Zm00001d032877	0	0.544098	-12.4097	9.48152e-10	8.60034e-08	down	yes
Zm00001d025806	0	0.54109	-12.4017	1.03038e-10	1.08838e-08	down	yes
Zm00001d002097	0	0.534501	-12.384	6.35056e-06	0.000257682	down	yes
Zm00001d038309	0	0.532994	-12.3799	0.00188933	0.0294601	down	yes
Zm00001d040133	0	0.530243	-12.3724	0.00243276	0.0355152	down	yes
Zm00001d017137	0	0.511425	-12.3203	6.61923e-09	5.09992e-07	down	yes
Zm00001d013894	0	0.507612	-12.3095	7.20801e-12	9.29237e-10	down	yes
Zm00001d008478	0	0.504216	-12.2998	0.000155621	0.00394106	down	yes
Zm00001d014053	0	0.503139	-12.2967	3.90279e-05	0.00123118	down	yes
Zm00001d038074	0	0.498058	-12.2821	1.19606e-06	5.81008e-05	down	yes
Zm00001d044524	0	0.496343	-12.2771	0.00013261	0.00345451	down	yes
Zm00001d049731	0.0178327	88.34	-12.2743	4.6289e-18	1.56261e-15	down	yes
Zm00001d031687	0	0.494739	-12.2725	0.00317572	0.0436012	down	yes
Zm00001d039749	0	0.491369	-12.2626	6.05332e-15	1.33186e-12	down	yes
Zm00001d025371	0	0.490951	-12.2614	0.000462785	0.00965217	down	yes
Zm00001d040245	0	0.484372	-12.2419	8.74169e-05	0.00244446	down	yes
Zm00001d021984	0	0.480711	-12.231	0.0013647	0.0229357	down	yes
Zm00001d014216	0	0.480545	-12.2305	1.2249e-12	1.84836e-10	down	yes
Zm00001d017485	0	0.476374	-12.2179	5.5347e-08	3.46527e-06	down	yes
Zm00001d045468	0	0.475968	-12.2166	1.53284e-08	1.08174e-06	down	yes
Zm00001d044383	0	0.470382	-12.1996	0.000687434	0.0132012	down	yes
Zm00001d033177	0	0.46893	-12.1952	2.74718e-06	0.00012239	down	yes
Zm00001d025018	0	0.467656	-12.1912	1.04311e-06	5.13634e-05	down	yes
Zm00001d029237	0	0.466652	-12.1881	1.2726e-14	2.72362e-12	down	yes
Zm00001d047596	0	0.464314	-12.1809	1.64343e-05	0.000590068	down	yes
Zm00001d027603	0	0.46135	-12.1716	1.92543e-12	2.77745e-10	down	yes
Zm00001d027540	0	0.456424	-12.1562	1.30949e-05	0.000484509	down	yes
Zm00001d019006	0	0.452197	-12.1427	0.00180203	0.028389	down	yes
Zm00001d030419	0	0.452058	-12.1423	1.09032e-05	0.000415144	down	yes
Zm00001d003784	0	0.451068	-12.1391	7.86748e-08	4.84249e-06	down	yes
Zm00001d002133	0	0.448064	-12.1295	0.000174903	0.00432567	down	yes
Zm00001d007623	0	0.446047	-12.123	2.91693e-06	0.000128736	down	yes
Zm00001d031922	0	0.443139	-12.1135	7.49719e-07	3.82988e-05	down	yes
Zm00001d009767	0	0.43947	-12.1016	6.75089e-06	0.000272239	down	yes
Zm00001d003733	0	0.43608	-12.0904	0.00019726	0.00477756	down	yes
Zm00001d014256	0	0.435069	-12.087	6.02671e-10	5.63842e-08	down	yes
Zm00001d005449	0	0.43222	-12.0776	3.12869e-05	0.00102347	down	yes
Zm00001d011414	0	0.432015	-12.0769	0.00195186	0.0302248	down	yes
Zm00001d032783	0	0.431936	-12.0766	2.42548e-06	0.000109699	down	yes
Zm00001d047339	0	0.431643	-12.0756	2.92244e-08	1.94899e-06	down	yes
Zm00001d007708	0	0.430992	-12.0734	5.31522e-11	5.89989e-09	down	yes
Zm00001d050866	0	0.430913	-12.0732	0.000148934	0.00380047	down	yes
Zm00001d054073	0	0.4305	-12.0718	1.38564e-13	2.45259e-11	down	yes
Zm00001d015606	0	0.425403	-12.0546	0.000606114	0.011985	down	yes
Zm00001d034394	0	0.425262	-12.0541	3.37469e-05	0.00108657	down	yes
Zm00001d007618	0	0.423835	-12.0493	3.97834e-06	0.000168091	down	yes
Zm00001d038550	0	0.42242	-12.0445	7.63391e-07	3.8876e-05	down	yes
Zm00001d043690	0	0.420394	-12.0375	2.10435e-06	9.63734e-05	down	yes
Zm00001d045285	0	0.413024	-12.012	3.44248e-07	1.89134e-05	down	yes
Zm00001d036999	0	0.412349	-12.0097	4.15976e-08	2.69506e-06	down	yes
Zm00001d024392	0	0.410428	-12.0029	0.00268382	0.0384434	down	yes
Zm00001d030726	0	0.40949	-11.9996	0.00133048	0.0225499	down	yes
Zm00001d051623	0	0.408137	-11.9948	0.00015939	0.00401788	down	yes
Zm00001d002220	0	0.406786	-11.9901	0.00164234	0.0264788	down	yes
Zm00001d045641	0	0.406297	-11.9883	4.14512e-07	2.25094e-05	down	yes
Zm00001d049017	0	0.405597	-11.9858	5.10383e-12	6.87756e-10	down	yes
Zm00001d016556	0	0.404677	-11.9826	2.52922e-05	0.000858988	down	yes
Zm00001d032062	0	0.401512	-11.9712	3.41344e-07	1.8817e-05	down	yes
Zm00001d004726	0	0.400853	-11.9689	8.48457e-07	4.29408e-05	down	yes
Zm00001d002227	0	0.400603	-11.968	0.00183871	0.0288635	down	yes
Zm00001d049793	0	0.398972	-11.9621	0.00214083	0.0322751	down	yes
Zm00001d044703	0	0.392519	-11.9385	4.04991e-13	6.56507e-11	down	yes
Zm00001d007672	0	0.392385	-11.9381	3.17218e-13	5.29965e-11	down	yes
Zm00001d016842	0	0.388902	-11.9252	1.7e-07	9.8875e-06	down	yes
Zm00001d038469	0	0.386013	-11.9144	1.87282e-07	1.07968e-05	down	yes
Zm00001d002188	0	0.384985	-11.9106	1.56351e-05	0.00056509	down	yes
Zm00001d028318	0	0.384592	-11.9091	0.000158274	0.00399589	down	yes
Zm00001d047167	0	0.382494	-11.9012	0.000126486	0.00332407	down	yes
Zm00001d039814	0	0.382145	-11.8999	2.65049e-11	3.09965e-09	down	yes
Zm00001d007620	0	0.380457	-11.8935	8.8094e-06	0.000345249	down	yes
Zm00001d037876	0	0.379895	-11.8914	5.71621e-06	0.000234265	down	yes
Zm00001d003753	0	0.375506	-11.8746	0.000163555	0.00409137	down	yes
Zm00001d029152	0	0.3736	-11.8673	9.94977e-08	5.97808e-06	down	yes
Zm00001d022091	0	0.37295	-11.8648	0.00306008	0.0424047	down	yes
Zm00001d013733	0	0.369623	-11.8518	3.67613e-07	2.0096e-05	down	yes
Zm00001d004066	0	0.366693	-11.8404	0.00225887	0.033606	down	yes
Zm00001d046128	0	0.365395	-11.8352	0.00043983	0.00928537	down	yes
Zm00001d017093	0	0.363297	-11.8269	7.18657e-07	3.6827e-05	down	yes
Zm00001d048649	0	0.343116	-11.7445	0.00248149	0.0361268	down	yes
Zm00001d043215	0	0.343021	-11.7441	0.000143449	0.00368122	down	yes
Zm00001d008746	0	0.342943	-11.7438	8.40516e-05	0.00236654	down	yes
Zm00001d049771	0	0.342763	-11.743	1.04881e-08	7.76999e-07	down	yes
Zm00001d009326	0	0.340757	-11.7345	5.20252e-06	0.000214826	down	yes
Zm00001d032827	0	0.340056	-11.7316	2.78665e-05	0.000924508	down	yes
Zm00001d033360	0	0.339909	-11.7309	0.000646076	0.0125703	down	yes
Zm00001d024475	0	0.336085	-11.7146	1.39547e-11	1.69868e-09	down	yes
Zm00001d029606	0	0.334256	-11.7067	0.00158736	0.0258398	down	yes
Zm00001d050607	0	0.333506	-11.7035	0.000636589	0.0124152	down	yes
Zm00001d050568	0	0.332788	-11.7004	0.00206956	0.031476	down	yes
Zm00001d031575	0	0.330746	-11.6915	0.000179776	0.0044195	down	yes
Zm00001d028525	0	0.328746	-11.6828	8.32322e-13	1.27357e-10	down	yes
Zm00001d008341	0	0.32544	-11.6682	0.00230416	0.0341401	down	yes
Zm00001d031880	0	0.325087	-11.6666	7.2287e-05	0.00208	down	yes
Zm00001d041650	0	0.316761	-11.6292	0.0021879	0.0328429	down	yes
Zm00001d036342	0	0.314315	-11.618	0.000282884	0.00644161	down	yes
Zm00001d016157	0	0.313413	-11.6139	0.00019778	0.00478663	down	yes
Zm00001d049070	0	0.313372	-11.6137	8.78148e-06	0.000344784	down	yes
Zm00001d013723	0	0.311836	-11.6066	1.66471e-06	7.77617e-05	down	yes
Zm00001d002670	0	0.309501	-11.5957	0.000179099	0.00440948	down	yes
Zm00001d025115	0	0.306045	-11.5795	0.00318832	0.0436826	down	yes
Zm00001d030603	0	0.305488	-11.5769	0.00304619	0.0422659	down	yes
Zm00001d030815	0	0.30392	-11.5695	1.36242e-06	6.4938e-05	down	yes
Zm00001d036898	0	0.301423	-11.5576	0.000924694	0.0167196	down	yes
Zm00001d007720	0	0.301123	-11.5561	0.00355838	0.04752	down	yes
Zm00001d041733	0	0.297435	-11.5384	0.000380655	0.00824374	down	yes
Zm00001d023982	0	0.297117	-11.5368	3.14924e-05	0.00102711	down	yes
Zm00001d042402	0	0.293964	-11.5214	0.00211621	0.0319775	down	yes
Zm00001d014393	0	0.290791	-11.5058	0.000413024	0.00880499	down	yes
Zm00001d045970	0	0.290401	-11.5038	0.00146382	0.0243313	down	yes
Zm00001d004356	0	0.282941	-11.4663	0.000351237	0.00772933	down	yes
Zm00001d019198	0	0.281773	-11.4603	0.000800367	0.0149079	down	yes
Zm00001d004798	0	0.278987	-11.446	0.00221678	0.0331152	down	yes
Zm00001d019999	0	0.278898	-11.4455	0.000626706	0.0122736	down	yes
Zm00001d047546	0	0.277374	-11.4376	0.000350305	0.00771513	down	yes
Zm00001d019803	0	0.276544	-11.4333	0.000258923	0.0059825	down	yes
Zm00001d023840	0	0.269375	-11.3954	0.00168014	0.0269819	down	yes
Zm00001d014263	0	0.266569	-11.3803	5.34501e-11	5.91292e-09	down	yes
Zm00001d027240	0.00285004	7.53215	-11.3679	8.4793e-51	1.85103e-47	down	yes
Zm00001d044855	0	0.26327	-11.3623	0.00057329	0.0114886	down	yes
Zm00001d042631	0	0.262757	-11.3595	0.000221781	0.00524348	down	yes
Zm00001d042677	0	0.262747	-11.3595	0.00199851	0.030738	down	yes
Zm00001d053221	0	0.26269	-11.3591	0.00268029	0.0384097	down	yes
Zm00001d028855	0	0.260052	-11.3446	8.7157e-06	0.000343436	down	yes
Zm00001d009342	0	0.258664	-11.3369	0.000207618	0.00498054	down	yes
Zm00001d030866	0	0.258168	-11.3341	4.05385e-05	0.00127027	down	yes
Zm00001d050989	0	0.255718	-11.3203	0.00313289	0.0431943	down	yes
Zm00001d005840	0	0.255696	-11.3202	1.42125e-10	1.4681e-08	down	yes
Zm00001d025248	0	0.255655	-11.32	1.0663e-05	0.000407423	down	yes
Zm00001d023351	0	0.254839	-11.3154	5.64035e-11	6.19776e-09	down	yes
Zm00001d051625	0	0.253705	-11.3089	2.4613e-05	0.000841288	down	yes
Zm00001d053206	0	0.252413	-11.3016	0.00298169	0.0416178	down	yes
Zm00001d032150	0	0.247882	-11.2754	0.000735263	0.0139734	down	yes
Zm00001d016632	0	0.246575	-11.2678	1.23919e-05	0.000463678	down	yes
Zm00001d041498	0	0.245221	-11.2599	3.67384e-06	0.000156845	down	yes
Zm00001d002043	0	0.238985	-11.2227	6.42152e-05	0.00188079	down	yes
Zm00001d002997	0	0.234794	-11.1972	0.00250149	0.0363566	down	yes
Zm00001d008615	0	0.234078	-11.1928	3.93156e-05	0.00123788	down	yes
Zm00001d035391	0	0.232896	-11.1855	1.68558e-06	7.86244e-05	down	yes
Zm00001d049384	0	0.229794	-11.1661	0.000829745	0.0153503	down	yes
Zm00001d051867	0	0.228557	-11.1583	0.000261716	0.00603088	down	yes
Zm00001d038958	0	0.221054	-11.1102	0.000134276	0.00348405	down	yes
Zm00001d044337	0	0.220277	-11.1051	0.00113926	0.0199813	down	yes
Zm00001d025733	0	0.215644	-11.0744	0.000839252	0.0154737	down	yes
Zm00001d023601	0	0.215008	-11.0702	0.000121596	0.00322924	down	yes
Zm00001d013968	0	0.213794	-11.062	0.000175198	0.00432971	down	yes
Zm00001d009529	0	0.213461	-11.0598	0.00232552	0.0343324	down	yes
Zm00001d004230	0	0.21327	-11.0585	3.18274e-14	6.39378e-12	down	yes
Zm00001d004727	0	0.210773	-11.0415	0.00127527	0.0218403	down	yes
Zm00001d006398	0.0184843	38.699	-11.0318	0.00334138	0.0453024	down	yes
Zm00001d023535	0	0.20877	-11.0277	0.000151499	0.0038486	down	yes
Zm00001d015074	0	0.206691	-11.0133	0.000656056	0.0127172	down	yes
Zm00001d003037	0	0.206211	-11.0099	0.000308743	0.00693878	down	yes
Zm00001d035704	0	0.205126	-11.0023	7.22148e-11	7.8042e-09	down	yes
Zm00001d025556	0	0.204219	-10.9959	0.00155088	0.0253919	down	yes
Zm00001d003085	0	0.203602	-10.9915	3.78453e-05	0.00120082	down	yes
Zm00001d007411	0	0.201815	-10.9788	0.00281238	0.0397632	down	yes
Zm00001d017602	0	0.201434	-10.9761	0.00150204	0.0247654	down	yes
Zm00001d048305	0	0.199441	-10.9617	0.00130175	0.0221664	down	yes
Zm00001d038840	0.0165137	32.5914	-10.9466	2.68521e-59	7.99339e-56	down	yes
Zm00001d010588	0	0.19184	-10.9057	2.20677e-05	0.000762245	down	yes
Zm00001d031263	0	0.19133	-10.9018	0.00195407	0.0302248	down	yes
Zm00001d039763	0	0.191131	-10.9003	0.000199307	0.00481647	down	yes
Zm00001d008586	0	0.186719	-10.8667	0.000968646	0.0173419	down	yes
Zm00001d038394	0	0.185783	-10.8594	1.16728e-05	0.000439847	down	yes
Zm00001d008382	0	0.185027	-10.8535	0.00167697	0.0269442	down	yes
Zm00001d051934	0	0.184331	-10.8481	7.52597e-05	0.00215042	down	yes
Zm00001d044863	0	0.181012	-10.8219	0.0006853	0.0131768	down	yes
Zm00001d051455	0	0.174668	-10.7704	0.00266215	0.0381999	down	yes
Zm00001d025081	0	0.174168	-10.7663	0.00283907	0.0400612	down	yes
Zm00001d019862	0	0.172337	-10.751	0.000214953	0.00510786	down	yes
Zm00001d038876	0	0.165205	-10.69	0.00115346	0.0201979	down	yes
Zm00001d041915	0	0.159884	-10.6428	4.95335e-09	3.91781e-07	down	yes
Zm00001d043021	0	0.15873	-10.6324	0.000776108	0.0145554	down	yes
Zm00001d046997	0	0.158599	-10.6312	0.000482664	0.00999945	down	yes
Zm00001d009641	0	0.158443	-10.6297	0.00144538	0.0240983	down	yes
Zm00001d012221	0	0.158442	-10.6297	0.000780176	0.0146066	down	yes
Zm00001d010489	0	0.157827	-10.6241	2.78291e-05	0.000924202	down	yes
Zm00001d024629	0	0.155822	-10.6057	0.000425684	0.00903957	down	yes
Zm00001d045455	0	0.155086	-10.5989	0.00183873	0.0288635	down	yes
Zm00001d003967	0	0.154736	-10.5956	0.000974788	0.0174233	down	yes
Zm00001d012859	0	0.15113	-10.5616	0.000487443	0.0100766	down	yes
Zm00001d025266	0	0.15109	-10.5612	0.00326237	0.0444554	down	yes
Zm00001d003666	0	0.147328	-10.5248	0.00242469	0.0354291	down	yes
Zm00001d006241	0	0.146932	-10.5209	4.29979e-08	2.76614e-06	down	yes
Zm00001d006522	0	0.146425	-10.5159	1.52142e-12	2.24409e-10	down	yes
Zm00001d032985	0	0.141568	-10.4673	5.10095e-08	3.22453e-06	down	yes
Zm00001d035548	0	0.139565	-10.4467	1.34423e-11	1.64242e-09	down	yes
Zm00001d016015	0	0.135491	-10.404	0.000350356	0.00771513	down	yes
Zm00001d026063	0	0.133114	-10.3784	0.00133876	0.0226551	down	yes
Zm00001d008568	0	0.128796	-10.3309	0.00354568	0.0474279	down	yes
Zm00001d022156	0	0.128598	-10.3286	0.00347194	0.0466894	down	yes
Zm00001d009138	0	0.127694	-10.3185	0.00238482	0.0350184	down	yes
Zm00001d043617	0	0.126958	-10.3101	0.00352349	0.0472222	down	yes
Zm00001d009851	0	0.125413	-10.2925	0.00152742	0.025108	down	yes
Zm00001d005458	0.00250987	3.11331	-10.2766	1.15979e-05	0.000437526	down	yes
Zm00001d042651	0	0.120365	-10.2332	9.0551e-06	0.000352567	down	yes
Zm00001d045377	0	0.11839	-10.2093	0.000225557	0.00532507	down	yes
Zm00001d037527	0	0.114833	-10.1653	5.91603e-07	3.11949e-05	down	yes
Zm00001d028627	0	0.112344	-10.1337	2.66944e-06	0.000119577	down	yes
Zm00001d007156	0.00175333	1.8724	-10.0606	2.34716e-18	8.35409e-16	down	yes
Zm00001d028621	0	0.104648	-10.0313	1.27945e-06	6.15209e-05	down	yes
Zm00001d002869	0	0.103735	-10.0187	0.00149752	0.0247408	down	yes
Zm00001d040413	0	0.103311	-10.0128	2.50712e-06	0.000112924	down	yes
Zm00001d026266	0	0.100756	-9.97665	0.00276756	0.0393162	down	yes
Zm00001d015046	0	0.0969776	-9.92151	0.00270148	0.0386152	down	yes
Zm00001d011430	0	0.092797	-9.85793	0.00366205	0.0485678	down	yes
Zm00001d017724	0	0.0921823	-9.84835	0.00194847	0.0302095	down	yes
Zm00001d023495	0	0.088555	-9.79043	0.00232008	0.0343139	down	yes
Zm00001d007637	0	0.088045	-9.7821	1.31304e-06	6.28591e-05	down	yes
Zm00001d016122	0	0.0843885	-9.7209	0.0001433	0.00368027	down	yes
Zm00001d037666	0	0.0833183	-9.70249	0.00134806	0.0227538	down	yes
Zm00001d035370	0	0.0824154	-9.68677	4.8772e-05	0.00148977	down	yes
Zm00001d030382	0.0253053	17.834	-9.46098	6.22133e-05	0.0018287	down	yes
Zm00001d016533	0.005192	3.60633	-9.44003	3.94365e-24	3.07464e-21	down	yes
Zm00001d003578	0	0.0675387	-9.39957	9.27658e-05	0.00255907	down	yes
Zm00001d037837	0	0.0596329	-9.21996	0.00325487	0.0444086	down	yes
Zm00001d018153	0	0.0549583	-9.10219	0.0036694	0.0486456	down	yes
Zm00001d005986	0	0.0538547	-9.07293	0.00272913	0.0389052	down	yes
Zm00001d050313	0	0.0530624	-9.05155	0.00199405	0.0306982	down	yes
Zm00001d002917	0.0462033	21.3884	-8.85461	1.42337e-06	6.73531e-05	down	yes
Zm00001d022397	0.00172384	0.758963	-8.78226	0.000334925	0.00744233	down	yes
Zm00001d014207	0.0135755	5.09759	-8.55266	5.39163e-79	2.94248e-75	down	yes
Zm00001d030316	0.02718	8.60796	-8.30698	2.87242e-08	1.91954e-06	down	yes
Zm00001d052443	0.0623909	19.6373	-8.29805	8.81441e-06	0.000345249	down	yes
Zm00001d052727	0.00220596	0.694271	-8.29795	6.77686e-10	6.28635e-08	down	yes
Zm00001d023656	0.0565047	15.4021	-8.09054	4.1479e-06	0.000174132	down	yes
Zm00001d025279	0.005355	1.38149	-8.01112	6.06037e-15	1.33186e-12	down	yes
Zm00001d012786	0.034289	8.6698	-7.98211	2.91714e-06	0.000128736	down	yes
Zm00001d042692	0.0297461	7.41537	-7.96168	7.96763e-114	1.3045e-109	down	yes
Zm00001d032850	0.00174267	0.420909	-7.91607	8.93109e-06	0.000348388	down	yes
Zm00001d041746	0.0330863	7.52487	-7.82929	9.93823e-07	4.92326e-05	down	yes
Zm00001d018189	0.00650867	1.41382	-7.76302	1.32649e-16	3.81017e-14	down	yes
Zm00001d002194	0.00560133	1.19143	-7.7327	3.40141e-06	0.000146551	down	yes
Zm00001d010093	0.107535	22.574	-7.71371	2.03164e-07	1.16304e-05	down	yes
Zm00001d042528	0.00766282	1.14494	-7.22318	1.12303e-05	0.000424636	down	yes
Zm00001d013294	0.0110993	1.63128	-7.19939	2.00001e-05	0.000702685	down	yes
Zm00001d035710	0.562142	81.1213	-7.173	3.59549e-06	0.000153901	down	yes
Zm00001d003693	0.002521	0.361885	-7.16539	1.03042e-06	5.08918e-05	down	yes
Zm00001d039672	0.00708467	0.931224	-7.03828	2.42943e-06	0.000109727	down	yes
Zm00001d039887	0.070244	8.37851	-6.89817	0.000410919	0.00877726	down	yes
Zm00001d007427	0.0347544	4.0012	-6.84709	1.64599e-32	2.15592e-29	down	yes
Zm00001d008466	0.0156437	1.76714	-6.8197	3.72566e-12	5.12591e-10	down	yes
Zm00001d007083	0.00292567	0.325061	-6.7958	0.00109919	0.0193822	down	yes
Zm00001d030399	0.0150093	1.58822	-6.72541	5.83697e-09	4.56161e-07	down	yes
Zm00001d052383	0.0175567	1.83947	-6.71113	4.92019e-09	3.90101e-07	down	yes
Zm00001d002231	0.00409533	0.428018	-6.70755	1.58259e-05	0.000571234	down	yes
Zm00001d041772	0.079741	8.22888	-6.68923	2.48663e-29	2.80775e-26	down	yes
Zm00001d005892	0.0209197	2.04265	-6.60944	6.41103e-05	0.0018794	down	yes
Zm00001d006229	0.0159683	1.49918	-6.55281	0.00186706	0.0291961	down	yes
Zm00001d041157	0.0191157	1.62743	-6.4117	5.23495e-08	3.29651e-06	down	yes
Zm00001d038202	0.0202083	1.64011	-6.3427	9.57371e-07	4.75707e-05	down	yes
Zm00001d045670	0.00166667	0.134267	-6.332	0.000390596	0.00840897	down	yes
Zm00001d009089	0.00398	0.306618	-6.26753	0.00013144	0.00343773	down	yes
Zm00001d045530	0.0468113	3.56085	-6.24922	3.20354e-06	0.000139495	down	yes
Zm00001d021186	0.0401227	3.00022	-6.22451	1.96615e-07	1.1295e-05	down	yes
Zm00001d040679	0.0666633	4.93438	-6.20983	0.000127716	0.00335101	down	yes
Zm00001d015028	0.156241	11.2372	-6.16836	8.13523e-61	2.66388e-57	down	yes
Zm00001d035703	0.019031	1.36681	-6.16631	1.07976e-09	9.68677e-08	down	yes
Zm00001d002599	0.00444377	0.318433	-6.16306	8.35274e-08	5.10988e-06	down	yes
Zm00001d005432	0.00691948	0.491709	-6.151	5.44306e-08	3.41442e-06	down	yes
Zm00001d044558	0.0621593	4.13701	-6.05647	2.35736e-06	0.000107062	down	yes
Zm00001d035621	0.0526985	3.3149	-5.97506	0.00295285	0.0412681	down	yes
Zm00001d046117	0.038365	2.39795	-5.96587	9.69835e-05	0.00266197	down	yes
Zm00001d045958	0.0137433	0.819291	-5.89757	2.1513e-08	1.48304e-06	down	yes
Zm00001d037000	0.0755407	4.47821	-5.88952	7.09466e-11	7.69254e-09	down	yes
Zm00001d025204	0.0236493	1.30651	-5.78778	1.98157e-05	0.000696954	down	yes
Zm00001d002195	0.0148932	0.812228	-5.76915	4.09697e-06	0.000172658	down	yes
Zm00001d029958	0.009915	0.540377	-5.76821	6.00021e-07	3.15879e-05	down	yes
Zm00001d017254	0.0362649	1.96967	-5.76324	2.17607e-11	2.58171e-09	down	yes
Zm00001d053631	0.0184772	0.979722	-5.72855	1.04809e-06	5.15311e-05	down	yes
Zm00001d034411	0.0231587	1.1802	-5.67134	0.000367618	0.00803045	down	yes
Zm00001d014523	0.0353263	1.69625	-5.58546	4.45885e-07	2.41331e-05	down	yes
Zm00001d014168	0.00738233	0.352509	-5.57744	0.00012607	0.00331847	down	yes
Zm00001d015129	0.007796	0.340106	-5.44711	0.000189596	0.00463654	down	yes
Zm00001d042675	0.0182797	0.778689	-5.41274	0.000240897	0.00563441	down	yes
Zm00001d038045	0.161132	6.64288	-5.36549	3.00748e-05	0.000988753	down	yes
Zm00001d028077	0.182222	7.36411	-5.33674	2.92409e-16	7.97912e-14	down	yes
Zm00001d031476	0.023985	0.953922	-5.31367	0.00257761	0.0372644	down	yes
Zm00001d046049	0.057915	2.27054	-5.29295	0.000539737	0.0109097	down	yes
Zm00001d009609	0.174396	6.64075	-5.25091	1.26692e-06	6.10977e-05	down	yes
Zm00001d009081	0.0215727	0.809107	-5.22905	0.000159974	0.00402688	down	yes
Zm00001d009512	0.0343867	1.27899	-5.21701	3.95071e-33	5.88027e-30	down	yes
Zm00001d011645	0.0184943	0.658431	-5.15388	0.000181957	0.0044664	down	yes
Zm00001d042353	0.049991	1.773	-5.14838	2.45207e-11	2.87788e-09	down	yes
Zm00001d047705	1.05078	36.4067	-5.11467	1.43567e-26	1.38267e-23	down	yes
Zm00001d015481	0.0425143	1.45537	-5.09729	0.00013737	0.00355305	down	yes
Zm00001d035244	0.0298323	1.01589	-5.08972	0.000275462	0.00630329	down	yes
Zm00001d042752	0.0604293	2.02768	-5.06844	1.1845e-09	1.05113e-07	down	yes
Zm00001d018088	0.0080953	0.2696	-5.05759	0.0001146	0.00307337	down	yes
Zm00001d003390	0.0142483	0.469224	-5.04141	0.000420906	0.00895553	down	yes
Zm00001d003045	0.011845	0.389449	-5.03909	0.000174498	0.00431893	down	yes
Zm00001d005780	0.0254507	0.831698	-5.03028	6.28306e-07	3.27089e-05	down	yes
Zm00001d023531	0.0209337	0.678247	-5.01791	0.00278736	0.0394692	down	yes
Zm00001d029604	0.0401223	1.29358	-5.01082	4.34603e-06	0.000181983	down	yes
Zm00001d033826	0.157992	5.08746	-5.00902	2.23153e-21	1.19789e-18	down	yes
Zm00001d043458	0.123891	3.89157	-4.97321	7.06461e-15	1.53199e-12	down	yes
Zm00001d047674	0.066464	2.07405	-4.96374	0.000213222	0.00509258	down	yes
Zm00001d035180	0.0147099	0.457647	-4.95937	0.00155524	0.0254451	down	yes
Zm00001d034854	0.0348767	1.08324	-4.95694	0.00058826	0.0117169	down	yes
Zm00001d010094	0.126517	3.91892	-4.95306	4.67148e-07	2.51592e-05	down	yes
Zm00001d036220	0.0658963	2.00557	-4.92767	0.000289739	0.00658239	down	yes
Zm00001d017896	0.0155943	0.473933	-4.92559	0.000614475	0.0120991	down	yes
Zm00001d046703	0.0147707	0.445923	-4.91599	0.000198775	0.00480717	down	yes
Zm00001d027071	0.0815657	2.43597	-4.90039	8.54525e-07	4.30569e-05	down	yes
Zm00001d003120	0.233948	6.69153	-4.83808	1.62885e-44	2.96315e-41	down	yes
Zm00001d016260	0.0642257	1.80194	-4.81026	1.14451e-06	5.56866e-05	down	yes
Zm00001d024014	0.43236	12.0071	-4.79551	0.00201296	0.0308812	down	yes
Zm00001d014460	0.008776	0.242292	-4.78704	0.000651485	0.0126463	down	yes
Zm00001d021736	0.627993	17.2551	-4.78013	0.000208228	0.00499152	down	yes
Zm00001d006066	0.0192367	0.528466	-4.77988	0.000135973	0.00352491	down	yes
Zm00001d020408	0.00577233	0.158266	-4.77706	0.00113832	0.0199754	down	yes
Zm00001d044708	0.043891	1.17234	-4.73932	0.00161774	0.0262242	down	yes
Zm00001d024560	0.141332	3.75193	-4.73047	0.000383248	0.00829442	down	yes
Zm00001d003186	0.0596937	1.54808	-4.69676	1.27847e-07	7.57023e-06	down	yes
Zm00001d003425	0.0526413	1.36181	-4.69319	8.81456e-05	0.00246274	down	yes
Zm00001d014888	0.042534	1.08126	-4.66795	0.000597447	0.011832	down	yes
Zm00001d011735	0.0183507	0.459875	-4.64734	0.00056779	0.0114063	down	yes
Zm00001d006795	0.0511137	1.2762	-4.642	5.70953e-05	0.00171051	down	yes
Zm00001d046962	0.554615	13.7133	-4.62795	1.35776e-25	1.15864e-22	down	yes
Zm00001d017606	0.0148497	0.359972	-4.59938	0.00258763	0.0373563	down	yes
Zm00001d017893	0.039946	0.955876	-4.5807	0.000717805	0.0136973	down	yes
Zm00001d034172	0.353306	8.44626	-4.57932	4.58713e-59	1.25171e-55	down	yes
Zm00001d019822	0.126418	3.00444	-4.57082	1.0269e-05	0.000395599	down	yes
Zm00001d031044	0.01569	0.369229	-4.5566	0.0017655	0.0280093	down	yes
Zm00001d036767	0.0811643	1.85462	-4.51414	0.00249538	0.0362838	down	yes
Zm00001d037792	0.025884	0.588187	-4.50614	4.10775e-06	0.000172668	down	yes
Zm00001d017370	0.0269093	0.601758	-4.483	0.000868838	0.0159028	down	yes
Zm00001d037650	0.199462	4.42647	-4.47197	0.00292289	0.0409192	down	yes
Zm00001d040500	0.107019	2.36318	-4.46479	7.90963e-11	8.46408e-09	down	yes
Zm00001d041467	0.016288	0.342568	-4.39451	0.00128887	0.0220158	down	yes
Zm00001d032106	0.0358457	0.753684	-4.39409	1.68404e-05	0.000602006	down	yes
Zm00001d029903	0.0460997	0.949294	-4.36403	0.00255964	0.0370372	down	yes
Zm00001d042888	0.0530245	1.08351	-4.35291	6.63493e-11	7.24203e-09	down	yes
Zm00001d017058	0.0378413	0.757515	-4.32324	0.00162484	0.0262873	down	yes
Zm00001d032084	4.473	87.794	-4.29481	4.245e-21	2.07466e-18	down	yes
Zm00001d008067	0.10204	1.99913	-4.29216	7.59852e-17	2.26194e-14	down	yes
Zm00001d043588	0.0416186	0.807431	-4.27804	3.16976e-11	3.65471e-09	down	yes
Zm00001d052254	0.074704	1.44628	-4.27501	0.000529113	0.0107214	down	yes
Zm00001d005286	0.021759	0.419766	-4.2699	0.00240614	0.0352366	down	yes
Zm00001d018158	0.115381	2.19451	-4.24942	0.00139004	0.0232942	down	yes
Zm00001d052991	0.0943377	1.78474	-4.24174	2.21731e-08	1.51895e-06	down	yes
Zm00001d038875	0.0309453	0.565632	-4.19207	1.88788e-05	0.000667588	down	yes
Zm00001d033978	0.080572	1.45177	-4.17139	8.87814e-06	0.000347329	down	yes
Zm00001d008632	0.085617	1.48979	-4.12107	6.64646e-05	0.00192942	down	yes
Zm00001d051143	0.138787	2.37682	-4.09809	6.482e-05	0.00189512	down	yes
Zm00001d006627	0.06261	1.06268	-4.08516	6.33874e-06	0.000257521	down	yes
Zm00001d021226	0.203098	3.43927	-4.08185	0.00158519	0.0258245	down	yes
Zm00001d006136	0.092176	1.54814	-4.07	0.000297676	0.006727	down	yes
Zm00001d016031	0.0348225	0.576986	-4.05044	0.000211027	0.00504386	down	yes
Zm00001d002533	0.224875	3.69643	-4.03894	2.72676e-05	0.00090832	down	yes
Zm00001d024160	0.764168	12.5561	-4.03835	6.09866e-05	0.00180073	down	yes
Zm00001d052102	0.0528713	0.858602	-4.02143	0.0028064	0.0396957	down	yes
Zm00001d014613	0.123844	2.01096	-4.02128	0.000216821	0.00514106	down	yes
Zm00001d035362	0.0317357	0.510687	-4.00826	0.00346551	0.0466221	down	yes
Zm00001d025795	0.0667865	1.06425	-3.99413	1.46589e-08	1.03673e-06	down	yes
Zm00001d044954	0.521435	8.25954	-3.9855	1.42985e-22	9.36411e-20	down	yes
Zm00001d025697	0.0311312	0.490618	-3.97817	0.000371486	0.00809336	down	yes
Zm00001d026273	0.0878198	1.3498	-3.94206	2.07636e-11	2.47238e-09	down	yes
Zm00001d053991	0.751729	11.5463	-3.94108	5.84465e-07	3.09681e-05	down	yes
Zm00001d003167	0.262244	3.99508	-3.92924	1.30128e-11	1.5959e-09	down	yes
Zm00001d048548	0.0731307	1.10179	-3.91324	0.000459079	0.00959321	down	yes
Zm00001d053993	0.200641	3.00128	-3.90289	1.28569e-06	6.16396e-05	down	yes
Zm00001d022017	0.0542229	0.807136	-3.89584	0.000494112	0.0101635	down	yes
Zm00001d044293	0.0115003	0.169668	-3.88297	0.000907908	0.0164524	down	yes
Zm00001d027710	0.049205	0.713405	-3.85784	0.00191741	0.0297985	down	yes
Zm00001d051096	0.357218	5.16156	-3.85293	1.87939e-12	2.72304e-10	down	yes
Zm00001d003823	0.126259	1.77233	-3.8112	4.54469e-09	3.64745e-07	down	yes
Zm00001d034861	0.024077	0.337051	-3.80724	2.22976e-06	0.000101832	down	yes
Zm00001d002408	1.4015	19.5892	-3.80502	4.86305e-36	7.96203e-33	down	yes
Zm00001d011446	0.146772	2.02687	-3.7876	2.53645e-06	0.000114088	down	yes
Zm00001d038456	0.171415	2.33953	-3.77066	4.23105e-05	0.00131948	down	yes
Zm00001d051099	0.370661	4.92554	-3.73211	2.77493e-12	3.89978e-10	down	yes
Zm00001d042063	0.113743	1.50484	-3.72576	0.00113601	0.0199564	down	yes
Zm00001d011656	0.0877663	1.15697	-3.72054	4.41569e-06	0.000184205	down	yes
Zm00001d005147	0.111312	1.41449	-3.66759	0.00368999	0.0488591	down	yes
Zm00001d043256	0.077324	0.975348	-3.65693	0.00063874	0.0124497	down	yes
Zm00001d009041	0.269075	3.33604	-3.63205	2.28679e-19	9.92442e-17	down	yes
Zm00001d011679	0.029403	0.362888	-3.62549	0.00379806	0.049853	down	yes
Zm00001d017932	0.0877219	1.07001	-3.60854	2.1196e-08	1.46427e-06	down	yes
Zm00001d008768	0.0511	0.621874	-3.60523	0.00189882	0.0295799	down	yes
Zm00001d047089	0.0673858	0.809844	-3.58713	0.00116611	0.0203975	down	yes
Zm00001d027546	0.581307	6.98238	-3.58635	0.00124767	0.021514	down	yes
Zm00001d006623	0.212897	2.54485	-3.57936	1.95529e-11	2.33672e-09	down	yes
Zm00001d038078	0.078415	0.93638	-3.57789	0.000210229	0.00503213	down	yes
Zm00001d052530	0.873799	10.4121	-3.57481	0.0037406	0.0493299	down	yes
Zm00001d013906	0.0501237	0.590781	-3.55906	1.20621e-09	1.06749e-07	down	yes
Zm00001d003411	6.29974	72.9642	-3.53382	9.03123e-35	1.40823e-31	down	yes
Zm00001d052392	0.732152	8.42122	-3.52381	1.3278e-49	2.71742e-46	down	yes
Zm00001d042082	0.224598	2.54762	-3.50373	0.000318201	0.00711713	down	yes
Zm00001d038544	0.076811	0.859837	-3.48468	0.00150594	0.0248172	down	yes
Zm00001d034641	0.069174	0.761404	-3.46036	0.00180018	0.028389	down	yes
Zm00001d021699	0.644253	6.84616	-3.4096	5.64861e-12	7.51885e-10	down	yes
Zm00001d027925	0.750906	7.91072	-3.39711	6.15794e-08	3.83349e-06	down	yes
Zm00001d031344	0.151627	1.59339	-3.3935	0.000508668	0.0103713	down	yes
Zm00001d051974	0.385845	4.04691	-3.39073	8.08019e-08	4.96409e-06	down	yes
Zm00001d027286	0.0952213	0.99003	-3.37812	0.000131459	0.00343773	down	yes
Zm00001d040161	0.0771042	0.791194	-3.35915	0.000367368	0.00803034	down	yes
Zm00001d041752	0.0747973	0.76149	-3.34777	7.68002e-05	0.0021854	down	yes
Zm00001d006437	0.142355	1.4453	-3.3438	1.43337e-05	0.00052267	down	yes
Zm00001d025503	1.2479	12.5913	-3.33485	7.76597e-06	0.000309364	down	yes
Zm00001d043740	0.114198	1.14509	-3.32585	0.000337647	0.00749068	down	yes
Zm00001d032728	0.0724967	0.723831	-3.31967	0.00185997	0.0290993	down	yes
Zm00001d014649	0.137275	1.36885	-3.31782	3.2459e-18	1.13071e-15	down	yes
Zm00001d024750	0.453412	4.51822	-3.31686	0.000481803	0.00999153	down	yes
Zm00001d028295	0.0977623	0.960452	-3.29636	2.50876e-05	0.000853943	down	yes
Zm00001d002410	1.27624	12.4289	-3.28372	1.29035e-07	7.61306e-06	down	yes
Zm00001d035322	0.0756237	0.728253	-3.26753	0.000177097	0.00437003	down	yes
Zm00001d006939	1.6392	15.7227	-3.26178	6.6735e-15	1.45683e-12	down	yes
Zm00001d034461	0.89744	8.60211	-3.2608	3.28263e-08	2.18032e-06	down	yes
Zm00001d037810	0.141651	1.34795	-3.25036	0.00265563	0.038123	down	yes
Zm00001d036545	0.103126	0.968197	-3.23089	0.00158771	0.0258398	down	yes
Zm00001d039981	0.038019	0.356395	-3.22868	0.00272471	0.0388761	down	yes
Zm00001d003287	0.197141	1.82353	-3.20943	0.00317714	0.0436024	down	yes
Zm00001d026238	0.0423497	0.389188	-3.20004	9.46473e-08	5.71813e-06	down	yes
Zm00001d032925	0.291853	2.66652	-3.19164	0.00167067	0.0268562	down	yes
Zm00001d025782	0.060285	0.549923	-3.18936	4.94405e-05	0.00150738	down	yes
Zm00001d031372	0.15488	1.40741	-3.18383	0.000474601	0.00985948	down	yes
Zm00001d016185	0.889788	7.97397	-3.16376	3.76836e-08	2.47285e-06	down	yes
Zm00001d018032	0.495622	4.43269	-3.16087	4.28954e-23	3.0535e-20	down	yes
Zm00001d003392	0.174741	1.55668	-3.15518	5.15141e-08	3.25015e-06	down	yes
Zm00001d006525	0.451073	4.00701	-3.15109	0.000161013	0.00404261	down	yes
Zm00001d017032	0.857433	7.53086	-3.13472	6.49434e-05	0.00189703	down	yes
Zm00001d029667	0.624847	5.4639	-3.12836	5.60379e-06	0.000229945	down	yes
Zm00001d024262	0.494275	4.29274	-3.11852	6.36918e-12	8.37585e-10	down	yes
Zm00001d046704	0.104983	0.910817	-3.11701	0.000488228	0.0100801	down	yes
Zm00001d025389	0.64256	5.49671	-3.09667	1.71234e-05	0.000610125	down	yes
Zm00001d014657	0.0913757	0.776235	-3.08661	0.000323531	0.00722156	down	yes
Zm00001d014511	0.010997	0.0933181	-3.08505	0.000620648	0.0121768	down	yes
Zm00001d044815	1.87367	15.2938	-3.02901	6.16776e-31	7.48012e-28	down	yes
Zm00001d021929	0.210944	1.71934	-3.02692	0.000104185	0.00283585	down	yes
Zm00001d052937	4.09255	33.3182	-3.02524	2.72584e-14	5.54395e-12	down	yes
Zm00001d052394	0.360545	2.8836	-2.99962	2.27159e-16	6.30366e-14	down	yes
ZeamMp091	0.331008	2.63952	-2.99534	0.00268758	0.0384523	down	yes
Zm00001d011394	0.427963	3.40243	-2.99101	3.72729e-05	0.00118841	down	yes
Zm00001d000665	0.402273	3.19726	-2.99059	1.62252e-10	1.64487e-08	down	yes
Zm00001d007845	0.615551	4.86313	-2.98193	1.47086e-10	1.50511e-08	down	yes
Zm00001d045225	0.0338387	0.264819	-2.96826	0.000246724	0.00575017	down	yes
Zm00001d001036	1.46387	11.4125	-2.96275	1.1719e-09	1.04276e-07	down	yes
Zm00001d014493	0.366971	2.85684	-2.96068	0.00133949	0.0226558	down	yes
Zm00001d044373	0.141627	1.0756	-2.92497	0.00182953	0.0287743	down	yes
Zm00001d034547	0.0812347	0.613262	-2.91634	7.56243e-06	0.000301622	down	yes
Zm00001d029668	0.586631	4.42016	-2.91357	5.72785e-05	0.00171404	down	yes
Zm00001d003048	1.2557	9.45906	-2.9132	3.104e-16	8.40003e-14	down	yes
Zm00001d052939	1.80436	13.5918	-2.91317	2.31924e-13	3.9349e-11	down	yes
Zm00001d053386	0.102111	0.767646	-2.9103	0.000894357	0.0162428	down	yes
Zm00001d017965	0.021957	0.163981	-2.90078	0.00240112	0.0351946	down	yes
Zm00001d023994	0.912704	6.80864	-2.89915	4.69463e-08	2.9966e-06	down	yes
Zm00001d043702	1.8509	13.7487	-2.893	0.000323084	0.00721651	down	yes
Zm00001d050328	0.0236086	0.174472	-2.88561	0.000521215	0.0105942	down	yes
Zm00001d008539	1.17642	8.68827	-2.88466	1.53865e-08	1.0835e-06	down	yes
Zm00001d052628	0.235156	1.70457	-2.85771	4.5549e-05	0.00140179	down	yes
Zm00001d047961	0.094693	0.682377	-2.84924	0.00343152	0.0462217	down	yes
Zm00001d037208	0.0528563	0.378627	-2.84063	0.00038792	0.00836787	down	yes
Zm00001d036088	0.176698	1.25913	-2.83307	0.000119954	0.00319601	down	yes
Zm00001d014060	1.29923	9.22562	-2.82799	1.29284e-11	1.5915e-09	down	yes
Zm00001d023296	0.348114	2.45623	-2.81881	0.000528202	0.0107162	down	yes
Zm00001d053365	1.58626	10.8209	-2.77012	2.76094e-11	3.20592e-09	down	yes
Zm00001d014885	0.83443	5.64387	-2.75782	4.02143e-14	7.79182e-12	down	yes
Zm00001d031923	0.172154	1.14523	-2.73387	8.75057e-08	5.32598e-06	down	yes
Zm00001d041725	2.57991	16.8949	-2.7112	1.07822e-13	1.9835e-11	down	yes
Zm00001d039993	10.1615	66.249	-2.70478	4.59254e-08	2.94291e-06	down	yes
Zm00001d041777	4.56524	29.2168	-2.67803	0.00234284	0.0345102	down	yes
Zm00001d017416	0.380038	2.42443	-2.67343	1.59282e-14	3.34338e-12	down	yes
Zm00001d052363	0.482502	3.06798	-2.66868	0.000142651	0.00367087	down	yes
Zm00001d043400	0.899898	5.70893	-2.66539	1.25486e-13	2.25771e-11	down	yes
Zm00001d028793	11.7643	74.4897	-2.66262	2.48031e-17	7.80941e-15	down	yes
Zm00001d043871	0.0370887	0.233313	-2.65321	0.00343073	0.0462217	down	yes
Zm00001d011753	0.616568	3.83901	-2.6384	0.000292332	0.00663369	down	yes
Zm00001d035162	0.346689	2.15488	-2.63589	0.000489125	0.0100917	down	yes
Zm00001d006170	0.676689	4.19512	-2.63215	4.23519e-05	0.00131952	down	yes
Zm00001d025862	0.190717	1.17776	-2.62654	5.75628e-05	0.00171823	down	yes
Zm00001d043528	2.29301	14.0893	-2.61929	4.08834e-14	7.87487e-12	down	yes
Zm00001d008548	1.03242	6.339	-2.61823	4.06887e-11	4.62622e-09	down	yes
Zm00001d004885	0.121275	0.742343	-2.6138	7.52899e-07	3.84014e-05	down	yes
Zm00001d051094	11.6974	71.5725	-2.61321	6.25407e-07	3.26098e-05	down	yes
Zm00001d009724	0.0474017	0.284312	-2.58446	2.02739e-07	1.16264e-05	down	yes
Zm00001d014063	0.385661	2.31289	-2.58429	6.08856e-07	3.18574e-05	down	yes
Zm00001d035304	5.16127	30.8568	-2.57979	2.43577e-21	1.28205e-18	down	yes
Zm00001d048625	0.955132	5.69697	-2.57642	8.26775e-07	4.19733e-05	down	yes
Zm00001d045581	1.77658	10.5092	-2.56447	1.84491e-07	1.06546e-05	down	yes
Zm00001d021208	1.18054	6.87509	-2.54193	0.00147549	0.0244757	down	yes
Zm00001d008485	0.241491	1.38668	-2.52159	0.000214794	0.0051078	down	yes
Zm00001d034663	0.289618	1.66072	-2.51958	0.0004487	0.00940632	down	yes
Zm00001d035097	0.155331	0.887624	-2.5146	4.62226e-08	2.95617e-06	down	yes
Zm00001d018229	0.434406	2.47921	-2.51277	5.16095e-05	0.00156477	down	yes
Zm00001d043197	0.88752	5.05766	-2.51062	1.33996e-09	1.16384e-07	down	yes
Zm00001d002161	0.854037	4.85794	-2.50797	0.000102343	0.002795	down	yes
Zm00001d005875	0.187927	1.06662	-2.50481	0.000384278	0.00830574	down	yes
Zm00001d006447	0.298475	1.67296	-2.48672	0.00299512	0.0417163	down	yes
Zm00001d042800	1.13881	6.37671	-2.48528	2.94905e-12	4.10922e-10	down	yes
Zm00001d031332	0.598248	3.31699	-2.47106	0.000131546	0.00343773	down	yes
Zm00001d039507	0.057148	0.316556	-2.46968	0.00213682	0.0322295	down	yes
Zm00001d041873	0.287069	1.5894	-2.46901	0.000958364	0.017186	down	yes
Zm00001d031866	0.321869	1.77791	-2.46564	0.000882253	0.0160764	down	yes
Zm00001d035084	0.752323	4.15484	-2.46537	3.18264e-07	1.76337e-05	down	yes
Zm00001d043965	0.950103	5.24189	-2.46393	1.01079e-13	1.86997e-11	down	yes
Zm00001d025141	2.46556	13.5889	-2.46244	1.10105e-05	0.000418258	down	yes
Zm00001d051995	0.17733	0.977301	-2.46237	0.00044738	0.00938467	down	yes
Zm00001d052051	0.0840426	0.463082	-2.46208	0.0026349	0.0378919	down	yes
Zm00001d038080	0.544935	2.97962	-2.45097	0.000584784	0.011669	down	yes
Zm00001d011661	1.01254	5.52867	-2.44895	0.00145267	0.0241951	down	yes
Zm00001d034630	2.42148	13.1532	-2.44145	2.41287e-66	9.8762e-63	down	yes
Zm00001d008573	2.93667	15.9248	-2.43903	1.42256e-06	6.73531e-05	down	yes
Zm00001d046745	1.8425	9.97952	-2.43731	9.14156e-05	0.00253635	down	yes
Zm00001d005828	1.18748	6.42193	-2.43511	8.2298e-23	5.49969e-20	down	yes
Zm00001d021690	0.52893	2.84518	-2.42737	1.57025e-07	9.16539e-06	down	yes
Zm00001d017204	0.215936	1.14357	-2.40487	0.000213377	0.00509258	down	yes
Zm00001d052683	14.9762	78.512	-2.39024	9.59195e-11	1.01977e-08	down	yes
Zm00001d022460	0.356994	1.86341	-2.38397	0.000345515	0.00762905	down	yes
Zm00001d003538	1.06646	5.55507	-2.38098	7.51226e-05	0.00215025	down	yes
Zm00001d033389	3.78276	19.6518	-2.37715	0.00184582	0.0289329	down	yes
Zm00001d025524	0.250117	1.29798	-2.37559	9.2403e-06	0.000358691	down	yes
Zm00001d003086	3.15565	16.3243	-2.37102	1.96326e-18	7.143e-16	down	yes
Zm00001d017276	0.453383	2.31787	-2.354	9.24524e-06	0.000358691	down	yes
Zm00001d051653	2.83052	14.3245	-2.33934	4.41598e-06	0.000184205	down	yes
Zm00001d018001	0.243962	1.22126	-2.32364	1.80863e-09	1.52638e-07	down	yes
Zm00001d031221	0.927127	4.62765	-2.31944	0.00180155	0.028389	down	yes
Zm00001d038288	2.54498	12.6242	-2.31046	4.15032e-05	0.00129926	down	yes
Zm00001d009103	0.524404	2.59628	-2.30769	2.31012e-07	1.31328e-05	down	yes
Zm00001d042633	0.508116	2.49984	-2.29861	0.00226644	0.0336879	down	yes
Zm00001d053569	1.43943	7.02033	-2.28604	9.20303e-07	4.58681e-05	down	yes
Zm00001d046202	2.42245	11.6192	-2.26197	0.000276584	0.00632013	down	yes
Zm00001d014345	0.178979	0.857697	-2.26068	0.000118908	0.00317331	down	yes
Zm00001d008199	0.305311	1.45588	-2.25354	0.000335013	0.00744233	down	yes
Zm00001d048212	0.0784177	0.372066	-2.24631	0.00175158	0.0278425	down	yes
Zm00001d017547	5.48528	25.9246	-2.24068	2.53113e-09	2.11434e-07	down	yes
Zm00001d004380	1.61493	7.61877	-2.23809	0.00217443	0.0326613	down	yes
Zm00001d026300	0.840283	3.93826	-2.22861	3.6393e-05	0.0011649	down	yes
Zm00001d053815	0.526376	2.46527	-2.22758	0.00197359	0.0304548	down	yes
Zm00001d042837	0.0914003	0.419994	-2.2001	0.00277694	0.039364	down	yes
Zm00001d005591	0.525514	2.41344	-2.19929	2.46725e-05	0.00084244	down	yes
Zm00001d052393	1.79912	8.23333	-2.19418	8.25204e-21	3.91613e-18	down	yes
Zm00001d014062	2.28704	10.4517	-2.19218	7.31943e-06	0.00029336	down	yes
Zm00001d003173	1.89716	8.55192	-2.17241	6.79774e-06	0.000273528	down	yes
Zm00001d043798	0.825138	3.70768	-2.16781	5.36628e-05	0.00161953	down	yes
Zm00001d025980	3.53157	15.8501	-2.16611	3.30637e-06	0.000143337	down	yes
Zm00001d051088	26.483	118.341	-2.15982	6.96337e-07	3.5876e-05	down	yes
Zm00001d040496	1.10712	4.9309	-2.15504	0.000436485	0.00923899	down	yes
Zm00001d012325	1.46716	6.51605	-2.15097	6.71284e-05	0.00194696	down	yes
Zm00001d004366	0.421919	1.86689	-2.1456	0.00126012	0.0216715	down	yes
Zm00001d003510	0.240727	1.05605	-2.1332	3.49983e-05	0.00112492	down	yes
Zm00001d003064	1.1131	4.87225	-2.13	2.72663e-05	0.00090832	down	yes
Zm00001d013549	1.54554	6.60618	-2.0957	8.02753e-05	0.00226996	down	yes
Zm00001d016648	0.358012	1.52985	-2.09531	2.97462e-07	1.65867e-05	down	yes
Zm00001d029101	4.91706	20.9441	-2.09067	3.87394e-05	0.00122326	down	yes
Zm00001d018011	2.7357	11.5801	-2.08167	1.24282e-27	1.31278e-24	down	yes
Zm00001d009599	9.94385	42.072	-2.08099	0.000132442	0.00345286	down	yes
Zm00001d019390	0.095775	0.402828	-2.07244	5.69146e-05	0.00170666	down	yes
Zm00001d043253	2.80168	11.7801	-2.07199	1.16751e-10	1.22631e-08	down	yes
Zm00001d002213	1.37321	5.75866	-2.06818	1.66619e-05	0.000596928	down	yes
Zm00001d002082	0.139472	0.584268	-2.06665	1.31024e-09	1.14106e-07	down	yes
Zm00001d039907	3.95756	16.5642	-2.06538	5.39418e-33	7.67967e-30	down	yes
Zm00001d016948	4.54897	19.0005	-2.06242	1.28905e-07	7.61306e-06	down	yes
Zm00001d022457	0.590619	2.46486	-2.06121	0.000125634	0.00330964	down	yes
Zm00001d007843	1.71912	7.16811	-2.05992	1.81811e-07	1.05184e-05	down	yes
Zm00001d003829	0.181121	0.753961	-2.05753	0.00219517	0.0329275	down	yes
Zm00001d032120	2.2631	9.42062	-2.05752	0.00210843	0.0319114	down	yes
Zm00001d007390	2.84274	11.6853	-2.03934	2.06389e-18	7.42659e-16	down	yes
Zm00001d006454	2.45763	9.96889	-2.02016	1.24177e-07	7.36625e-06	down	yes
Zm00001d043274	3.4082	13.7773	-2.01521	4.17816e-12	5.67692e-10	down	yes
Zm00001d003349	0.728211	2.93811	-2.01246	4.64735e-06	0.000193377	down	yes
Zm00001d052684	6.09529	24.5924	-2.01245	1.90668e-05	0.000673507	down	yes
Zm00001d045272	1.17372	4.70221	-2.00225	0.00129557	0.0220956	down	yes
Zm00001d000482	0.707121	2.83221	-2.0019	0.00373341	0.0492548	down	yes

## Sheet: UP
Supplementary Table S2 DEGs regulated leaf angle under ABA treatment group
gene_id	FPKM.b112_A	FPKM.WT_A	log2(fc) (b112_A VS B73_A)	pval (b112_A VS B73_A)	qval (b112_A VS B73_A)	regulation	significant
Zm00001d003445	16.9807	0	17.3735	1.37996e-25	1.15864e-22	up	yes
Zm00001d052011	12.2085	0	16.8975	3.66022e-32	4.60976e-29	up	yes
Zm00001d049882	11.499	0	16.8111	1.00606e-20	4.70622e-18	up	yes
Zm00001d052507	11.304	0	16.7865	3.47889e-26	3.07882e-23	up	yes
Zm00001d007370	3.95228	0	15.2704	1.81981e-18	6.77154e-16	up	yes
Zm00001d048776	3.74261	0	15.1918	7.56311e-11	8.1198e-09	up	yes
Zm00001d050274	3.4946	0	15.0928	5.12336e-17	1.59559e-14	up	yes
Zm00001d005073	3.28373	0	15.003	3.14321e-16	8.43642e-14	up	yes
zma-MIR398a	2.63196	0	14.6839	1.02315e-05	0.000394616	up	yes
ENSRNA049997069	2.6137	0	14.6738	1.02315e-05	0.000394616	up	yes
Zm00001d007011	2.51601	0	14.6188	1.44255e-11	1.74949e-09	up	yes
Zm00001d052372	1.95486	0	14.2548	1.75141e-15	4.31203e-13	up	yes
Zm00001d052474	1.87635	0	14.1956	3.29711e-12	4.55544e-10	up	yes
Zm00001d003435	1.70649	0	14.0587	1.92589e-11	2.31001e-09	up	yes
Zm00001d000472	1.65611	0	14.0155	3.21091e-18	1.13055e-15	up	yes
Zm00001d018029	1.51183	0	13.884	5.41391e-11	5.96897e-09	up	yes
Zm00001d037681	1.29634	0	13.6622	1.89412e-09	1.59442e-07	up	yes
Zm00001d016183	1.24955	0	13.6091	5.24442e-12	7.03806e-10	up	yes
zma-MIR396e	1.23615	0	13.5936	0.000462641	0.00965217	up	yes
ENSRNA049997253	1.14161	0	13.4788	0.000820056	0.0151882	up	yes
Zm00001d026952	1.0284	0	13.3281	8.11262e-09	6.16352e-07	up	yes
Zm00001d052539	0.968715	0	13.2419	4.93666e-06	0.000204513	up	yes
Zm00001d050272	0.940663	0	13.1995	2.22498e-12	3.19549e-10	up	yes
Zm00001d023700	0.831528	0	13.0215	2.18796e-07	1.24646e-05	up	yes
Zm00001d039539	0.821585	0	13.0042	2.52869e-08	1.71079e-06	up	yes
Zm00001d027017	0.737168	0	12.8478	9.89067e-06	0.000382825	up	yes
Zm00001d051932	0.71819	0	12.8101	1.4178e-09	1.22173e-07	up	yes
Zm00001d007071	0.536328	0	12.3889	1.74207e-06	8.10284e-05	up	yes
Zm00001d047864	0.435552	0	12.0886	2.23943e-06	0.000102131	up	yes
Zm00001d001039	0.429713	0	12.0692	0.000767766	0.0144486	up	yes
Zm00001d027636	0.426177	0	12.0572	3.20383e-05	0.00103974	up	yes
Zm00001d005890	0.380748	0	11.8946	4.88279e-08	3.1046e-06	up	yes
Zm00001d008956	0.315193	0	11.622	8.94187e-05	0.00249405	up	yes
Zm00001d006947	0.31504	0	11.6213	2.72328e-06	0.000121798	up	yes
Zm00001d038387	0.313011	0	11.612	0.000160221	0.00402953	up	yes
Zm00001d007046	0.302434	0	11.5624	1.41433e-06	6.7119e-05	up	yes
Zm00001d027021	44.5343	0.015326	11.5047	1.78457e-05	0.000635172	up	yes
Zm00001d014114	0.28978	0	11.5007	3.60226e-10	3.47952e-08	up	yes
Zm00001d052551	0.288558	0	11.4946	3.16682e-05	0.00103079	up	yes
Zm00001d006880	0.28458	0	11.4746	5.84082e-06	0.000239072	up	yes
Zm00001d003496	0.271941	0	11.4091	1.31397e-05	0.00048562	up	yes
Zm00001d043180	0.26022	0	11.3455	0.000627162	0.0122752	up	yes
Zm00001d029776	0.248286	0	11.2778	3.28197e-06	0.000142531	up	yes
Zm00001d005076	0.227446	0	11.1513	7.71721e-05	0.00219358	up	yes
Zm00001d034150	0.193643	0	10.9192	0.000201344	0.00485555	up	yes
Zm00001d013735	0.176819	0	10.7881	0.00017175	0.00426057	up	yes
Zm00001d047165	0.14988	0	10.5496	0.00168138	0.0269886	up	yes
Zm00001d000806	0.126362	0	10.3033	0.00330303	0.0448644	up	yes
Zm00001d014083	0.112297	0	10.1331	0.000433957	0.0091931	up	yes
Zm00001d039617	0.074549	0	9.54205	4.35483e-05	0.00134909	up	yes
Zm00001d042742	0.0582547	0	9.18623	0.00223537	0.0333472	up	yes
Zm00001d011597	0.0331463	0	8.3727	0.00299777	0.0417355	up	yes
Zm00001d039546	6.56285	0.0198703	8.36756	1.34798e-12	2.01551e-10	up	yes
Zm00001d048783	2.61353	0.0114179	7.83856	3.08788e-53	7.7779e-50	up	yes
Zm00001d048644	1.43851	0.00996567	7.17339	8.31671e-08	5.09982e-06	up	yes
Zm00001d048660	81.5583	0.588689	7.11418	5.6545e-05	0.00169713	up	yes
Zm00001d027606	9.46654	0.0782567	6.91848	1.4357e-09	1.23333e-07	up	yes
Zm00001d000805	4.19508	0.0457353	6.51924	1.91245e-08	1.32958e-06	up	yes
Zm00001d052064	1.78171	0.0194323	6.51866	0.00136794	0.0229709	up	yes
Zm00001d004102	1.13168	0.0157603	6.16602	8.79367e-07	4.40288e-05	up	yes
Zm00001d007396	0.856669	0.0144621	5.88839	3.09955e-10	3.0028e-08	up	yes
Zm00001d035405	3.79351	0.068036	5.80109	0.000619052	0.0121601	up	yes
Zm00001d015394	0.371592	0.00801433	5.53499	0.000215583	0.00511913	up	yes
Zm00001d004348	133.56	2.89588	5.52734	7.51014e-13	1.16e-10	up	yes
Zm00001d018210	0.254095	0.00578267	5.45749	0.000953752	0.0171322	up	yes
ENSRNA049997133	284.767	7.37215	5.27155	3.87637e-08	2.51947e-06	up	yes
Zm00001d051485	29.1317	0.791031	5.20271	4.41919e-64	1.60785e-60	up	yes
ZemaCp032	332.699	9.15588	5.18338	2.11331e-108	2.30668e-104	up	yes
Zm00001d035182	0.849866	0.0251103	5.08088	7.94552e-05	0.00225039	up	yes
Zm00001d035178	2.53684	0.0759417	5.062	1.09915e-08	8.06798e-07	up	yes
Zm00001d007269	0.236835	0.00729433	5.02096	0.00289163	0.0406032	up	yes
Zm00001d048709	436.647	13.6252	5.00211	4.85905e-39	8.3742e-36	up	yes
ZeamMp134	48.5434	1.54223	4.97619	1.27908e-124	4.18836e-120	up	yes
Zm00001d044276	0.196965	0.00633833	4.95769	0.00030651	0.00690754	up	yes
Zm00001d037081	0.218327	0.00770073	4.82535	0.00023085	0.00543045	up	yes
Zm00001d037680	14.5398	0.518719	4.80891	4.81148e-46	9.26775e-43	up	yes
Zm00001d007718	146.199	5.60188	4.70588	2.57038e-21	1.28205e-18	up	yes
Zm00001d045698	103.314	3.96695	4.70286	4.0221e-102	3.29259e-98	up	yes
Zm00001d029755	9.17703	0.369833	4.63308	6.55072e-09	5.05904e-07	up	yes
Zm00001d027695	3.72461	0.154706	4.58948	1.12243e-06	5.46934e-05	up	yes
Zm00001d051907	0.991378	0.0415097	4.57792	1.9219e-10	1.91868e-08	up	yes
Zm00001d048710	163.402	7.07066	4.53044	6.58722e-33	8.98743e-30	up	yes
Zm00001d052807	1.10536	0.0484527	4.5118	0.000189037	0.00462633	up	yes
Zm00001d006402	81.4147	3.95202	4.36463	1.52104e-92	9.96127e-89	up	yes
ENSRNA049997515	12.6626	0.707798	4.16109	2.51578e-05	0.000855442	up	yes
Zm00001d047259	1.68218	0.09619	4.1283	3.50288e-05	0.00112492	up	yes
zma-MIR408b	13.7515	0.860371	3.99849	1.53617e-05	0.000556437	up	yes
ENSRNA049997441	13.6184	0.858254	3.98801	1.06998e-05	0.000408349	up	yes
Zm00001d041670	29.5581	1.89802	3.96098	0.00100793	0.0179568	up	yes
Zm00001d036100	1.08416	0.073029	3.89197	0.000213909	0.00510112	up	yes
zma-MIR398b	15.7121	1.08609	3.85466	6.79958e-06	0.000273528	up	yes
Zm00001d004346	971.63	67.7508	3.8421	4.10711e-06	0.000172668	up	yes
Zm00001d004344	972.621	67.8378	3.84172	3.73734e-06	0.000159161	up	yes
Zm00001d004342	675.782	47.4692	3.83149	1.65727e-05	0.000594385	up	yes
ZemaCp085	1.05037	0.076817	3.77333	3.42943e-07	1.88734e-05	up	yes
Zm00001d004343	35.2395	2.63786	3.73975	1.58581e-06	7.45012e-05	up	yes
Zm00001d013907	71.8597	5.76365	3.64013	6.89957e-09	5.30344e-07	up	yes
Zm00001d025533	0.899275	0.0725343	3.63203	3.07934e-05	0.00100934	up	yes
Zm00001d053324	11.8027	0.998512	3.56319	1.58132e-13	2.76469e-11	up	yes
Zm00001d048705	271.959	26.7323	3.34673	2.01065e-16	5.62725e-14	up	yes
Zm00001d049629	2.44042	0.245578	3.31287	0.000161112	0.00404261	up	yes
Zm00001d022630	657.023	69.8234	3.23416	0.000148698	0.00379807	up	yes
Zm00001d006775	1.87031	0.212346	3.13879	2.44625e-05	0.000837015	up	yes
Zm00001d023869	5.80742	0.686216	3.08116	0.00190258	0.0296244	up	yes
Zm00001d015072	2.05026	0.242574	3.07931	0.00352454	0.0472222	up	yes
Zm00001d007106	0.847312	0.10321	3.0373	0.00362621	0.0481314	up	yes
Zm00001d007349	34.1201	4.17569	3.03053	1.00362e-18	3.8663e-16	up	yes
Zm00001d048702	390.748	48.4853	3.01062	6.14402e-19	2.51483e-16	up	yes
Zm00001d038891	4.82163	0.62835	2.93988	6.13444e-09	4.76001e-07	up	yes
Zm00001d006914	0.684215	0.090569	2.91736	0.00309688	0.042824	up	yes
Zm00001d016076	2.53888	0.344043	2.88353	0.000692471	0.0132757	up	yes
Zm00001d024281	287.843	40.3366	2.83512	6.91265e-14	1.30841e-11	up	yes
Zm00001d035570	3.97066	0.564058	2.81546	1.88713e-51	4.41387e-48	up	yes
Zm00001d019629	35.0268	4.98502	2.81279	1.23247e-09	1.08779e-07	up	yes
Zm00001d034045	0.590338	0.085138	2.79367	0.00165436	0.0266262	up	yes
Zm00001d044183	0.765964	0.111408	2.78143	2.65338e-05	0.000891126	up	yes
Zm00001d016895	6.47004	0.944469	2.7762	1.47439e-12	2.18456e-10	up	yes
Zm00001d023693	12.7739	1.88897	2.75753	2.09768e-06	9.62023e-05	up	yes
Zm00001d035684	34.6449	5.1331	2.75474	3.60488e-05	0.00115501	up	yes
Zm00001d022053	1.53026	0.23213	2.72077	0.000574515	0.0115061	up	yes
Zm00001d052518	19.9334	3.0469	2.70977	5.29879e-11	5.89989e-09	up	yes
Zm00001d010840	483.222	74.7979	2.69162	1.06312e-08	7.84051e-07	up	yes
Zm00001d048694	1.50614	0.235892	2.67466	2.36688e-06	0.000107346	up	yes
Zm00001d048875	1.4898	0.233732	2.67219	6.46119e-07	3.35828e-05	up	yes
Zm00001d002735	7.01339	1.104	2.66737	4.64765e-06	0.000193377	up	yes
Zm00001d031657	82.1822	13.0891	2.65046	5.16515e-17	1.59559e-14	up	yes
Zm00001d022496	1.32913	0.213938	2.63522	0.00128619	0.021989	up	yes
Zm00001d000607	8.71041	1.40769	2.62941	2.79996e-05	0.000927982	up	yes
Zm00001d037439	1.88881	0.308947	2.61205	2.0116e-05	0.000704491	up	yes
Zm00001d035020	0.779808	0.128175	2.605	0.00244664	0.035702	up	yes
Zm00001d047495	3.53929	0.600669	2.55882	2.05683e-05	0.000718793	up	yes
Zm00001d002799	1.22124	0.21066	2.53536	0.000751734	0.014204	up	yes
Zm00001d038223	0.161663	0.0281277	2.52293	0.0005055	0.010331	up	yes
Zm00001d015870	0.341844	0.0597128	2.51723	0.000458736	0.00959216	up	yes
Zm00001d006874	1.55131	0.271513	2.51439	1.54429e-05	0.000558759	up	yes
Zm00001d019338	1.5454	0.276314	2.4836	1.79211e-08	1.24857e-06	up	yes
Zm00001d017785	1.09089	0.196009	2.47651	0.000411243	0.00877845	up	yes
Zm00001d052192	1.67796	0.301923	2.47446	0.00157147	0.0256776	up	yes
Zm00001d000556	6.57203	1.19674	2.45722	5.18573e-05	0.00157083	up	yes
Zm00001d052245	0.817917	0.149344	2.45332	3.62682e-06	0.00015504	up	yes
Zm00001d001360	3.4072	0.630913	2.43307	0.000620107	0.0121735	up	yes
Zm00001d049111	62.4529	11.6824	2.41843	0.00334867	0.0453388	up	yes
Zm00001d034092	1.26766	0.238361	2.41095	9.62864e-05	0.00264505	up	yes
Zm00001d016436	0.55547	0.105257	2.39979	0.000440945	0.00928537	up	yes
Zm00001d035133	1.16578	0.222811	2.3874	3.1148e-07	1.73165e-05	up	yes
Zm00001d025142	4.97909	0.952844	2.38557	0.000557647	0.0112232	up	yes
Zm00001d038563	0.80501	0.154696	2.37957	0.000784571	0.0146553	up	yes
Zm00001d042500	1.00512	0.194737	2.36777	1.41497e-07	8.30343e-06	up	yes
Zm00001d031991	0.803777	0.156556	2.36012	0.0030297	0.0420727	up	yes
Zm00001d027073	1.73478	0.338642	2.35692	0.00121194	0.0210084	up	yes
Zm00001d010560	3.52179	0.6894	2.3529	2.96967e-06	0.000130701	up	yes
Zm00001d047219	1.19616	0.234319	2.35187	0.000197005	0.00477493	up	yes
Zm00001d005787	7.56297	1.48473	2.34876	3.36494e-06	0.000145363	up	yes
ZemaCp059	3.05542	0.600032	2.34826	4.94029e-06	0.000204513	up	yes
Zm00001d035562	15.7863	3.10853	2.34437	4.7098e-09	3.77072e-07	up	yes
Zm00001d027557	22.5459	4.45454	2.33952	2.4557e-07	1.3888e-05	up	yes
Zm00001d034104	8.90685	1.76135	2.33824	5.10349e-05	0.00155022	up	yes
Zm00001d011079	54.3166	10.7538	2.33655	0.000689409	0.0132248	up	yes
Zm00001d040979	83.111	16.5068	2.33198	2.35741e-12	3.35623e-10	up	yes
ZemaCp060	2.66381	0.530387	2.32837	0.000313486	0.00703571	up	yes
Zm00001d005786	7.31388	1.46225	2.32245	3.4734e-06	0.00014926	up	yes
Zm00001d016691	121.313	24.2753	2.32117	1.83211e-12	2.66633e-10	up	yes
Zm00001d007130	3.44986	0.697128	2.30704	0.000656734	0.0127172	up	yes
Zm00001d008983	0.219143	0.0449564	2.28527	0.00314494	0.0433057	up	yes
Zm00001d039935	3.45136	0.708194	2.28495	1.60742e-05	0.000578405	up	yes
Zm00001d024340	1.43612	0.295989	2.27855	0.000720292	0.0137287	up	yes
Zm00001d009610	0.321131	0.0664989	2.27176	0.00130319	0.0221793	up	yes
Zm00001d010380	7.81479	1.62314	2.26742	2.32156e-07	1.31749e-05	up	yes
Zm00001d029696	6.98165	1.45991	2.25769	3.17421e-06	0.000138402	up	yes
Zm00001d007096	18.3238	3.84334	2.25329	6.75333e-68	3.15911e-64	up	yes
Zm00001d005546	6.30122	1.32603	2.24852	1.14334e-05	0.00043182	up	yes
Zm00001d023675	0.747373	0.157367	2.24769	0.00118742	0.0206599	up	yes
Zm00001d007105	1.01791	0.216064	2.23608	0.00100302	0.0178888	up	yes
Zm00001d051251	7.83824	1.66504	2.23497	0.000365034	0.00799001	up	yes
Zm00001d038197	1.99939	0.426565	2.22872	0.000147621	0.0037735	up	yes
Zm00001d019590	1.32971	0.285119	2.22148	0.00356416	0.0475584	up	yes
Zm00001d018195	6.33871	1.37085	2.20912	7.10164e-10	6.55051e-08	up	yes
Zm00001d026942	4.22726	0.916066	2.2062	3.87342e-06	0.000164294	up	yes
Zm00001d005804	108.379	23.6294	2.19743	4.4765e-18	1.54298e-15	up	yes
Zm00001d053557	6.67043	1.46057	2.19125	6.81416e-07	3.52495e-05	up	yes
Zm00001d028574	17.489	3.86618	2.17747	4.20215e-13	6.7783e-11	up	yes
Zm00001d040026	1.78165	0.416099	2.09821	0.00136478	0.0229357	up	yes
Zm00001d052277	1.81913	0.428847	2.08472	1.22126e-05	0.000458076	up	yes
Zm00001d011080	134.58	32.0949	2.06805	2.81022e-05	0.000929503	up	yes
Zm00001d049946	6.86869	1.64414	2.06271	0.000200977	0.00485323	up	yes
Zm00001d002457	1.0469	0.252003	2.05462	6.09031e-07	3.18574e-05	up	yes
Zm00001d037359	6.01534	1.47495	2.02798	0.000873525	0.0159618	up	yes
Zm00001d051556	6.30484	1.56613	2.00925	3.73413e-11	4.26042e-09	up	yes
Zm00001d040656	16.8036	4.17453	2.00908	5.27294e-14	1.00385e-11	up	yes
Zm00001d024802	48.3374	12.0657	2.00223	6.99573e-11	7.61047e-09	up	yes
Zm00001d049803	11.8139	2.95196	2.00074	0.00355687	0.0475192	up	yes
