# Supplementary material for: Morphological characterization and transcriptome analysis of leaf angle mutant bhlh112 in maize [Zea mays L.]
Source: Front Plant Sci. 2022 Oct 7;13:995815. doi: 10.3389/fpls.2022.995815 (PMC9585351; doi:10.3389/fpls.2022.995815)
Supplement: Supplementary file 3 [file Table_3.xlsx]

## Sheet: DOWN
Supplementary Table S3 DEGs regulated leaf angle under IAA treatment group
gene_id	FPKM.b112_I	FPKM.WT_I	log2(fc) (b112_I VS B73_I)	pval (b112_I VS B73_I)	qval (b112_I VS B73_I)	regulation	significant
Zm00001d049731	0	79.8666	-19.6072	2.51116e-38	9.02929e-35	down	yes
Zm00001d038840	0	36.1625	-18.4641	6.12202e-33	1.65096e-29	down	yes
Zm00001d023924	0	24.1944	-17.8843	3.36845e-11	9.31677e-09	down	yes
Zm00001d003452	0	23.4987	-17.8422	3.98675e-31	9.92424e-28	down	yes
Zm00001d043124	0	20.1966	-17.6238	3.15705e-28	4.86502e-25	down	yes
Zm00001d015498	0	20.1237	-17.6185	4.76053e-24	5.70576e-21	down	yes
Zm00001d052201	0	19.328	-17.5603	4.89929e-25	6.09792e-22	down	yes
Zm00001d045759	0	13.642	-17.0577	1.25519e-28	2.25663e-25	down	yes
Zm00001d027240	0	13.0961	-16.9988	3.01341e-33	8.86518e-30	down	yes
Zm00001d034171	0	12.5833	-16.9411	4.225e-13	1.75289e-10	down	yes
Zm00001d011059	0	6.86434	-16.0668	2.2321e-11	6.44939e-09	down	yes
Zm00001d049263	0	6.2306	-15.9271	2.92894e-09	3.69329e-07	down	yes
Zm00001d022729	0	5.90983	-15.8508	4.70374e-16	3.10648e-13	down	yes
Zm00001d039494	0	5.52851	-15.7546	3.39377e-16	2.38752e-13	down	yes
Zm00001d028394	0	5.40156	-15.7211	1.05588e-12	4.0199e-10	down	yes
Zm00001d004723	0	5.35851	-15.7095	1.24827e-21	1.39294e-18	down	yes
Zm00001d010510	0	5.04635	-15.623	1.08734e-10	2.45058e-08	down	yes
Zm00001d031037	0	4.63066	-15.4989	6.83606e-10	1.12295e-07	down	yes
Zm00001d032371	0	4.50136	-15.4581	7.46801e-22	8.63115e-19	down	yes
Zm00001d003969	0	4.44527	-15.44	9.86197e-13	3.8451e-10	down	yes
Zm00001d022794	0	4.01393	-15.2927	4.26322e-14	2.26167e-11	down	yes
Zm00001d018824	0	4.00834	-15.2907	1.21976e-09	1.74657e-07	down	yes
Zm00001d040952	0	3.87816	-15.2431	1.09863e-10	2.45192e-08	down	yes
Zm00001d051745	0	3.85661	-15.235	1.9169e-08	1.86284e-06	down	yes
Zm00001d043260	0	3.8277	-15.2242	3.70493e-10	6.73569e-08	down	yes
Zm00001d021186	0	3.81874	-15.2208	1.92694e-12	6.92865e-10	down	yes
Zm00001d002480	0	3.69329	-15.1726	2.55529e-17	1.92307e-14	down	yes
Zm00001d016256	0	3.66999	-15.1635	3.96725e-08	3.58615e-06	down	yes
Zm00001d009180	0	3.65529	-15.1577	1.21432e-10	2.65517e-08	down	yes
Zm00001d016818	0	3.62492	-15.1457	1.37876e-09	1.92319e-07	down	yes
Zm00001d039887	0	3.53867	-15.1109	2.54363e-10	5.06359e-08	down	yes
Zm00001d052319	0	3.52506	-15.1054	2.93138e-15	1.75671e-12	down	yes
Zm00001d038045	0	3.44286	-15.0713	3.43721e-05	0.00172448	down	yes
Zm00001d030822	0	3.28022	-15.0015	1.14556e-09	1.66989e-07	down	yes
Zm00001d052131	0	3.25666	-14.9911	4.63212e-11	1.23884e-08	down	yes
Zm00001d034172	0	3.19982	-14.9657	4.60072e-08	4.07901e-06	down	yes
Zm00001d011009	0	3.04886	-14.896	4.93435e-14	2.57549e-11	down	yes
Zm00001d051713	0	2.91468	-14.831	8.07949e-10	1.26922e-07	down	yes
Zm00001d040852	0	2.89806	-14.8228	4.68462e-10	8.23908e-08	down	yes
Zm00001d053226	0	2.85508	-14.8012	6.40969e-10	1.06371e-07	down	yes
Zm00001d036129	0	2.78368	-14.7647	2.74138e-10	5.28059e-08	down	yes
Zm00001d003090	0	2.48868	-14.6031	3.41379e-10	6.4229e-08	down	yes
Zm00001d000677	0	2.39215	-14.546	2.2286e-09	2.89638e-07	down	yes
Zm00001d029316	0	2.39085	-14.5452	1.34968e-10	2.93133e-08	down	yes
Zm00001d050770	0	2.36665	-14.5306	9.92633e-10	1.49407e-07	down	yes
Zm00001d007156	0	2.35678	-14.5245	5.09544e-21	5.31914e-18	down	yes
Zm00001d007056	0	2.31535	-14.4989	7.3015e-21	7.38387e-18	down	yes
Zm00001d027175	0	2.31155	-14.4966	2.00601e-17	1.58333e-14	down	yes
Zm00001d028839	0	2.28104	-14.4774	3.40604e-10	6.4229e-08	down	yes
Zm00001d037940	0	2.24282	-14.453	6.1917e-14	3.18047e-11	down	yes
Zm00001d049250	0	2.21563	-14.4354	7.91061e-10	1.25488e-07	down	yes
Zm00001d044020	0	2.15748	-14.3971	1.33754e-13	6.15012e-11	down	yes
Zm00001d050700	0	2.15199	-14.3934	4.62245e-09	5.34239e-07	down	yes
Zm00001d035621	0	2.14634	-14.3896	6.06186e-10	1.02706e-07	down	yes
Zm00001d050775	0	2.13184	-14.3798	1.78324e-09	2.39486e-07	down	yes
Zm00001d007335	0	2.07889	-14.3435	6.74701e-11	1.65409e-08	down	yes
Zm00001d016734	0	2.07483	-14.3407	2.52388e-12	8.78229e-10	down	yes
Zm00001d013713	0	2.05962	-14.3301	6.17494e-10	1.04077e-07	down	yes
Zm00001d021462	0	2.03919	-14.3157	1.58735e-06	0.00011167	down	yes
Zm00001d013647	0	2.01974	-14.3019	7.38677e-10	1.19295e-07	down	yes
Zm00001d014207	0	2.01747	-14.3003	5.78277e-11	1.50916e-08	down	yes
Zm00001d019793	0	1.97018	-14.266	6.74701e-11	1.65409e-08	down	yes
Zm00001d047250	0	1.91373	-14.2241	2.07715e-09	2.74362e-07	down	yes
Zm00001d025371	0	1.90835	-14.22	2.07596e-09	2.74362e-07	down	yes
Zm00001d010511	0	1.89192	-14.2076	4.22357e-09	4.95213e-07	down	yes
Zm00001d007147	0	1.88192	-14.1999	1.06941e-09	1.5948e-07	down	yes
Zm00001d036390	0	1.84648	-14.1725	2.61885e-10	5.07476e-08	down	yes
Zm00001d030216	0	1.84595	-14.1721	1.71909e-09	2.32768e-07	down	yes
Zm00001d001770	0	1.80757	-14.1418	9.83673e-10	1.48751e-07	down	yes
Zm00001d036209	0	1.80236	-14.1376	3.27606e-12	1.10434e-09	down	yes
Zm00001d051801	0	1.78692	-14.1252	3.49635e-10	6.50261e-08	down	yes
Zm00001d042401	0	1.74755	-14.093	2.94843e-14	1.59023e-11	down	yes
Zm00001d044558	0	1.73702	-14.0843	7.9574e-09	8.52681e-07	down	yes
Zm00001d021463	0	1.73562	-14.0832	0.000206486	0.00761057	down	yes
Zm00001d007132	0	1.71969	-14.0699	1.26973e-09	1.80218e-07	down	yes
Zm00001d008001	0	1.71084	-14.0624	1.09046e-10	2.45058e-08	down	yes
Zm00001d005892	0	1.6691	-14.0268	2.50936e-06	0.000168826	down	yes
Zm00001d008083	0	1.65216	-14.0121	8.73819e-10	1.33385e-07	down	yes
Zm00001d040673	0	1.6477	-14.0082	3.5102e-09	4.28462e-07	down	yes
Zm00001d018551	0	1.60435	-13.9697	2.55049e-10	5.06359e-08	down	yes
Zm00001d045003	0	1.59725	-13.9633	3.15373e-12	1.07429e-09	down	yes
Zm00001d008773	0	1.59391	-13.9603	3.69072e-10	6.73569e-08	down	yes
Zm00001d025140	0	1.58239	-13.9498	6.20069e-11	1.60528e-08	down	yes
Zm00001d039672	0	1.57109	-13.9395	1.38148e-11	4.29865e-09	down	yes
Zm00001d052183	0	1.56528	-13.9341	8.49615e-12	2.72222e-09	down	yes
Zm00001d040375	0	1.52145	-13.8932	5.22392e-09	5.91088e-07	down	yes
Zm00001d049673	0	1.51895	-13.8908	8.86902e-11	2.07978e-08	down	yes
Zm00001d039497	0	1.51597	-13.888	1.30303e-08	1.30955e-06	down	yes
Zm00001d019794	0	1.51067	-13.8829	2.00799e-08	1.94552e-06	down	yes
Zm00001d047323	0	1.4858	-13.8589	4.62245e-09	5.34239e-07	down	yes
Zm00001d024053	0	1.45294	-13.8267	6.87573e-10	1.12377e-07	down	yes
Zm00001d032255	0	1.43985	-13.8136	2.18999e-08	2.09057e-06	down	yes
Zm00001d031305	0	1.42897	-13.8027	1.00266e-06	7.34096e-05	down	yes
Zm00001d025316	0	1.42041	-13.794	4.86505e-10	8.51016e-08	down	yes
Zm00001d019792	0	1.40252	-13.7757	6.29948e-10	1.05081e-07	down	yes
Zm00001d024575	0	1.39565	-13.7687	2.09345e-10	4.34271e-08	down	yes
Zm00001d030314	0	1.36845	-13.7403	3.93014e-09	4.67585e-07	down	yes
Zm00001d022310	0	1.34958	-13.7202	1.13988e-09	1.66913e-07	down	yes
Zm00001d044450	0	1.34306	-13.7132	1.80837e-10	3.82488e-08	down	yes
Zm00001d002458	0	1.31892	-13.6871	7.44649e-10	1.19295e-07	down	yes
Zm00001d051623	0	1.3155	-13.6833	0.000532453	0.015984	down	yes
Zm00001d051342	0	1.27557	-13.6389	9.83673e-10	1.48751e-07	down	yes
Zm00001d015278	0	1.25411	-13.6144	1.08084e-09	1.60445e-07	down	yes
Zm00001d040674	0	1.21673	-13.5707	2.40787e-11	6.89567e-09	down	yes
Zm00001d005337	0	1.20594	-13.5579	6.74701e-11	1.65409e-08	down	yes
Zm00001d016533	0	1.2008	-13.5517	8.49011e-10	1.30833e-07	down	yes
Zm00001d020059	0	1.20043	-13.5513	1.20799e-10	2.65517e-08	down	yes
Zm00001d021538	0	1.18222	-13.5292	7.42157e-09	8.08651e-07	down	yes
Zm00001d028083	0	1.16756	-13.5112	1.57169e-09	2.14605e-07	down	yes
Zm00001d015538	0	1.15168	-13.4915	2.13526e-10	4.37337e-08	down	yes
Zm00001d043750	0	1.13919	-13.4757	3.52186e-09	4.28462e-07	down	yes
Zm00001d002194	0	1.13406	-13.4692	2.22229e-07	1.77132e-05	down	yes
Zm00001d033400	0	1.07138	-13.3872	1.86144e-10	3.88633e-08	down	yes
Zm00001d050937	0	1.06737	-13.3818	6.55725e-11	1.65409e-08	down	yes
Zm00001d011137	0	1.05616	-13.3665	3.73308e-09	4.4743e-07	down	yes
Zm00001d034116	0	1.0453	-13.3516	3.40604e-10	6.4229e-08	down	yes
Zm00001d039831	0	1.00622	-13.2967	3.4739e-09	4.27448e-07	down	yes
Zm00001d015940	0	1.00425	-13.2938	4.84188e-06	0.000309049	down	yes
Zm00001d004333	0	0.984976	-13.2659	7.44649e-10	1.19295e-07	down	yes
Zm00001d032879	0	0.983585	-13.2638	2.59705e-09	3.30878e-07	down	yes
Zm00001d026057	0	0.979046	-13.2572	1.55963e-10	3.34246e-08	down	yes
Zm00001d050618	0	0.971847	-13.2465	8.57137e-09	9.12428e-07	down	yes
Zm00001d030198	0	0.967852	-13.2406	4.87881e-09	5.55927e-07	down	yes
Zm00001d038443	0	0.964803	-13.236	9.70464e-16	6.15788e-13	down	yes
Zm00001d034623	0	0.937024	-13.1939	0.00200049	0.0410618	down	yes
Zm00001d009843	0	0.936725	-13.1934	3.24433e-11	9.05085e-09	down	yes
Zm00001d049390	0	0.929712	-13.1826	1.25127e-09	1.78381e-07	down	yes
Zm00001d051655	0	0.925556	-13.1761	1.15806e-08	1.18594e-06	down	yes
Zm00001d040149	0	0.923209	-13.1724	2.70712e-11	7.61785e-09	down	yes
Zm00001d013111	0	0.884255	-13.1102	3.06711e-09	3.83223e-07	down	yes
Zm00001d025971	0	0.882264	-13.107	1.46305e-09	2.01472e-07	down	yes
Zm00001d021814	0	0.881418	-13.1056	1.25337e-08	1.27148e-06	down	yes
Zm00001d053364	0	0.866594	-13.0811	7.9574e-09	8.52681e-07	down	yes
Zm00001d002188	0	0.865116	-13.0787	1.03986e-08	1.08551e-06	down	yes
Zm00001d039559	0	0.836616	-13.0303	1.97724e-09	2.63315e-07	down	yes
Zm00001d050281	0	0.83318	-13.0244	7.9574e-09	8.52681e-07	down	yes
Zm00001d052168	0	0.818935	-12.9995	4.92135e-11	1.30541e-08	down	yes
Zm00001d004869	0	0.811089	-12.9856	3.98729e-09	4.72647e-07	down	yes
Zm00001d040209	0	0.792027	-12.9513	2.2286e-09	2.89638e-07	down	yes
Zm00001d032062	0	0.781142	-12.9314	4.13582e-09	4.88465e-07	down	yes
Zm00001d028001	0	0.780166	-12.9296	4.01142e-10	7.17201e-08	down	yes
Zm00001d053366	0	0.77076	-12.9121	5.43974e-08	4.74489e-06	down	yes
Zm00001d041838	0	0.766288	-12.9037	6.35364e-09	6.99354e-07	down	yes
Zm00001d003136	0	0.764081	-12.8995	7.65304e-10	1.22e-07	down	yes
Zm00001d035807	0	0.740497	-12.8543	1.86144e-10	3.88633e-08	down	yes
Zm00001d001029	0	0.736226	-12.8459	2.02918e-06	0.00013928	down	yes
Zm00001d041929	0	0.731643	-12.8369	4.97113e-05	0.00234848	down	yes
Zm00001d030183	0	0.729837	-12.8334	1.04687e-09	1.56842e-07	down	yes
Zm00001d006088	0	0.727769	-12.8293	2.4854e-10	4.99565e-08	down	yes
Zm00001d039288	0	0.718759	-12.8113	1.70449e-08	1.67148e-06	down	yes
Zm00001d031306	0	0.715829	-12.8054	0.000725705	0.0201411	down	yes
Zm00001d052991	0	0.704868	-12.7831	2.32928e-10	4.71112e-08	down	yes
Zm00001d007131	0	0.688045	-12.7483	6.29948e-10	1.05081e-07	down	yes
Zm00001d047589	0	0.67804	-12.7272	3.91161e-09	4.67099e-07	down	yes
Zm00001d051923	0	0.669727	-12.7094	2.9857e-10	5.71718e-08	down	yes
Zm00001d046528	0	0.666967	-12.7034	2.3577e-08	2.23747e-06	down	yes
Zm00001d046121	0	0.666207	-12.7018	3.58439e-10	6.62825e-08	down	yes
Zm00001d041041	0	0.664593	-12.6983	0.000700415	0.0196584	down	yes
Zm00001d047143	0	0.66178	-12.6921	9.30713e-06	0.000554674	down	yes
Zm00001d001823	0	0.654033	-12.6751	1.87799e-07	1.53857e-05	down	yes
Zm00001d030930	0	0.64345	-12.6516	1.45894e-08	1.4527e-06	down	yes
Zm00001d037921	0	0.639438	-12.6426	9.10724e-11	2.12028e-08	down	yes
Zm00001d044846	0	0.638401	-12.6402	1.54784e-09	2.12245e-07	down	yes
Zm00001d032105	0	0.624961	-12.6096	3.69007e-05	0.00183997	down	yes
Zm00001d027738	0	0.624736	-12.609	7.05164e-11	1.71578e-08	down	yes
Zm00001d026376	0	0.622163	-12.6031	9.79985e-11	2.26524e-08	down	yes
Zm00001d039888	0	0.617957	-12.5933	3.34641e-08	3.0678e-06	down	yes
Zm00001d001852	0	0.617775	-12.5929	5.02279e-05	0.00236598	down	yes
Zm00001d002195	0	0.61626	-12.5893	2.94288e-08	2.74451e-06	down	yes
Zm00001d017245	0	0.606106	-12.5654	1.302e-09	1.83992e-07	down	yes
Zm00001d048305	0	0.6056	-12.5642	0.00221857	0.0441544	down	yes
Zm00001d017370	0	0.604967	-12.5626	2.46383e-08	2.33135e-06	down	yes
Zm00001d011546	0	0.604724	-12.5621	3.46952e-09	4.27448e-07	down	yes
Zm00001d035636	0	0.599374	-12.5492	1.71516e-08	1.67686e-06	down	yes
Zm00001d035316	0	0.595785	-12.5406	4.22357e-09	4.95213e-07	down	yes
Zm00001d001166	0	0.590057	-12.5266	1.07126e-08	1.11112e-06	down	yes
Zm00001d024978	0	0.588184	-12.5221	2.26924e-09	2.93739e-07	down	yes
Zm00001d043341	0	0.580335	-12.5027	6.55725e-11	1.65409e-08	down	yes
Zm00001d049686	0	0.569346	-12.4751	2.5634e-08	2.40447e-06	down	yes
Zm00001d036913	0	0.567243	-12.4698	3.67332e-09	4.45215e-07	down	yes
Zm00001d050344	0	0.566293	-12.4673	7.00227e-10	1.1387e-07	down	yes
Zm00001d052589	0	0.563649	-12.4606	1.16666e-09	1.68467e-07	down	yes
Zm00001d016157	0	0.55606	-12.441	1.53776e-06	0.00010857	down	yes
Zm00001d033566	0	0.554188	-12.4362	5.44884e-10	9.4294e-08	down	yes
Zm00001d009945	0	0.551003	-12.4278	0.000152153	0.00599005	down	yes
Zm00001d028732	0	0.54402	-12.4094	2.61502e-10	5.07476e-08	down	yes
Zm00001d035703	0	0.54014	-12.3991	1.84983e-09	2.47365e-07	down	yes
Zm00001d010397	0	0.534814	-12.3848	4.64722e-08	4.10898e-06	down	yes
Zm00001d019176	0	0.529928	-12.3716	3.70493e-10	6.73569e-08	down	yes
Zm00001d012099	0	0.52619	-12.3614	1.35009e-08	1.35264e-06	down	yes
Zm00001d050378	0	0.524749	-12.3574	8.64859e-10	1.32643e-07	down	yes
Zm00001d012682	0	0.521329	-12.348	4.41643e-12	1.44364e-09	down	yes
Zm00001d033177	0	0.516851	-12.3355	6.68478e-08	5.79963e-06	down	yes
Zm00001d018189	0	0.511273	-12.3199	0.000567741	0.0166721	down	yes
Zm00001d025018	0	0.503225	-12.297	4.83784e-09	5.53206e-07	down	yes
Zm00001d025480	0	0.49899	-12.2848	8.57137e-09	9.12428e-07	down	yes
Zm00001d038074	0	0.497399	-12.2802	5.12357e-07	3.85591e-05	down	yes
Zm00001d004726	0	0.495182	-12.2737	8.57883e-08	7.34443e-06	down	yes
Zm00001d017254	0	0.494664	-12.2722	2.21613e-09	2.89638e-07	down	yes
Zm00001d030693	0	0.48758	-12.2514	4.16718e-10	7.36908e-08	down	yes
Zm00001d041726	0	0.483383	-12.239	9.45735e-07	6.95567e-05	down	yes
Zm00001d031733	0	0.482284	-12.2357	1.15806e-08	1.18594e-06	down	yes
Zm00001d004332	0	0.478489	-12.2243	0.00201843	0.0413407	down	yes
Zm00001d041103	0	0.476925	-12.2195	4.02859e-08	3.62137e-06	down	yes
Zm00001d013718	0	0.469842	-12.198	1.14901e-10	2.5468e-08	down	yes
Zm00001d027897	0	0.441408	-12.1079	6.84785e-09	7.48659e-07	down	yes
Zm00001d016068	0	0.43896	-12.0999	3.4739e-09	4.27448e-07	down	yes
Zm00001d023443	0	0.438659	-12.0989	0.00134976	0.0313564	down	yes
Zm00001d049017	0	0.427282	-12.061	5.98374e-09	6.65429e-07	down	yes
Zm00001d051709	0	0.423658	-12.0487	9.91415e-09	1.04847e-06	down	yes
Zm00001d009915	0	0.422876	-12.046	1.70449e-08	1.67148e-06	down	yes
Zm00001d045456	0	0.421436	-12.0411	0.0006671	0.0189868	down	yes
Zm00001d011666	0	0.417328	-12.027	6.20504e-09	6.86187e-07	down	yes
Zm00001d045285	0	0.401536	-11.9713	2.03656e-07	1.64352e-05	down	yes
Zm00001d009081	0	0.389051	-11.9257	0.00135506	0.0314382	down	yes
Zm00001d049912	0	0.386814	-11.9174	4.01142e-10	7.17201e-08	down	yes
Zm00001d029743	0	0.386217	-11.9152	4.02859e-08	3.62137e-06	down	yes
Zm00001d009524	0	0.371456	-11.859	4.16718e-10	7.36908e-08	down	yes
Zm00001d051008	0	0.371382	-11.8587	2.61502e-10	5.07476e-08	down	yes
Zm00001d012533	0	0.368336	-11.8468	8.25956e-10	1.27889e-07	down	yes
Zm00001d048774	0	0.364243	-11.8307	0.00019908	0.00739657	down	yes
Zm00001d008583	0	0.363627	-11.8282	8.25956e-10	1.27889e-07	down	yes
Zm00001d012262	0	0.355326	-11.7949	1.18178e-08	1.20642e-06	down	yes
Zm00001d016260	0	0.352749	-11.7844	0.00071437	0.0199119	down	yes
Zm00001d001694	0	0.344698	-11.7511	0.000466723	0.0145049	down	yes
Zm00001d047138	0	0.339367	-11.7286	2.13526e-10	4.37337e-08	down	yes
Zm00001d027021	0.0132513	44.8488	-11.7247	0.00015927	0.0062173	down	yes
Zm00001d013733	0	0.337628	-11.7212	8.19374e-11	1.94969e-08	down	yes
Zm00001d015050	0	0.325063	-11.6665	4.34626e-08	3.86399e-06	down	yes
Zm00001d013894	0	0.319889	-11.6434	7.3087e-11	1.76505e-08	down	yes
Zm00001d035209	0	0.317368	-11.6319	1.54985e-11	4.73156e-09	down	yes
Zm00001d048408	0	0.316999	-11.6303	1.78351e-09	2.39486e-07	down	yes
Zm00001d044580	0	0.314971	-11.621	0.000252263	0.0089512	down	yes
Zm00001d037395	0	0.308054	-11.589	6.41671e-09	7.03902e-07	down	yes
Zm00001d022295	0	0.30638	-11.5811	7.0119e-06	0.000429758	down	yes
Zm00001d039763	0	0.304511	-11.5723	0.000230489	0.00832462	down	yes
Zm00001d053387	0	0.297225	-11.5373	0.0025434	0.0486735	down	yes
Zm00001d022530	0	0.282748	-11.4653	5.66176e-06	0.000355768	down	yes
Zm00001d007569	0	0.28242	-11.4636	0.000633008	0.0182737	down	yes
Zm00001d047167	0	0.281275	-11.4578	0.000200625	0.00742841	down	yes
Zm00001d004510	0	0.277796	-11.4398	4.26624e-09	4.96618e-07	down	yes
Zm00001d043064	0	0.271328	-11.4058	0.000399649	0.0128944	down	yes
Zm00001d050640	0	0.259761	-11.343	3.06283e-09	3.83223e-07	down	yes
Zm00001d003620	0	0.248414	-11.2785	3.61883e-08	3.28387e-06	down	yes
Zm00001d049226	0	0.244898	-11.258	9.44344e-06	0.000561345	down	yes
Zm00001d049672	0	0.243013	-11.2468	4.2273e-08	3.77327e-06	down	yes
Zm00001d032064	0	0.240812	-11.2337	3.34641e-08	3.0678e-06	down	yes
Zm00001d035013	0	0.237336	-11.2127	0.000555283	0.0164556	down	yes
Zm00001d049464	0	0.237203	-11.2119	0.00157648	0.0348236	down	yes
Zm00001d036409	0	0.23278	-11.1847	0.000413244	0.0132144	down	yes
Zm00001d002546	0	0.220027	-11.1035	0.00144929	0.0328436	down	yes
Zm00001d002005	0	0.21802	-11.0902	0.00115912	0.0280346	down	yes
Zm00001d030253	0	0.21713	-11.0843	1.10682e-05	0.000646532	down	yes
Zm00001d049070	0	0.216931	-11.083	0.000133631	0.0053988	down	yes
Zm00001d054073	0	0.21045	-11.0393	6.32122e-11	1.6235e-08	down	yes
Zm00001d046779	0	0.197522	-10.9478	2.469e-11	7.00871e-09	down	yes
Zm00001d042949	0	0.19693	-10.9435	0.00107835	0.0267943	down	yes
Zm00001d051261	0	0.194648	-10.9266	0.00103258	0.0259838	down	yes
Zm00001d005598	0	0.18873	-10.8821	0.000105153	0.00441725	down	yes
Zm00001d021660	0	0.186247	-10.863	6.74701e-11	1.65409e-08	down	yes
Zm00001d004109	0	0.182572	-10.8343	2.5634e-08	2.40447e-06	down	yes
Zm00001d049771	0	0.176732	-10.7873	2.18999e-08	2.09057e-06	down	yes
Zm00001d025839	0	0.171159	-10.7411	0.000382618	0.0124505	down	yes
Zm00001d019446	0	0.169653	-10.7284	0.000708845	0.0198262	down	yes
Zm00001d041516	0	0.167707	-10.7117	0.00202736	0.0414712	down	yes
Zm00001d003168	0	0.16247	-10.666	0.00122433	0.0291693	down	yes
Zm00001d031867	0	0.157864	-10.6245	1.62587e-06	0.000113885	down	yes
Zm00001d040005	0	0.153137	-10.5806	0.00041183	0.0131822	down	yes
Zm00001d039814	0	0.136961	-10.4195	4.26624e-09	4.96618e-07	down	yes
Zm00001d047737	0	0.127224	-10.3132	0.00174973	0.0376232	down	yes
Zm00001d052727	0	0.122275	-10.2559	1.15806e-08	1.18594e-06	down	yes
Zm00001d028525	0	0.119665	-10.2248	1.17132e-09	1.68467e-07	down	yes
Zm00001d024068	0	0.110858	-10.1145	0.00247628	0.0478131	down	yes
Zm00001d032729	0	0.101759	-9.99094	0.0017712	0.037909	down	yes
Zm00001d005840	0	0.101007	-9.98024	3.71001e-09	4.46318e-07	down	yes
Zm00001d021434	0	0.092428	-9.85219	0.00133974	0.0311909	down	yes
Zm00001d004230	0	0.0770682	-9.58999	2.61502e-10	5.07476e-08	down	yes
Zm00001d006241	0	0.0670506	-9.38911	4.81699e-05	0.00229275	down	yes
Zm00001d037527	0	0.0582102	-9.18513	9.35337e-05	0.00401438	down	yes
Zm00001d009902	0.0848137	34.2665	-8.65829	8.32594e-46	4.49059e-42	down	yes
Zm00001d042692	0.0073702	2.60515	-8.46545	0.000603541	0.0175168	down	yes
Zm00001d008067	0.0142353	2.5981	-7.51184	5.53542e-16	3.58263e-13	down	yes
Zm00001d021608	0.0228687	3.83344	-7.38912	1.1645e-15	7.24701e-13	down	yes
Zm00001d033826	0.0621777	8.07677	-7.02124	1.21513e-13	5.78279e-11	down	yes
Zm00001d043122	0.107974	12.7782	-6.88686	1.09435e-09	1.61183e-07	down	yes
Zm00001d042528	0.00370024	0.421703	-6.83247	3.30307e-05	0.00167017	down	yes
Zm00001d029604	0.00973267	0.783587	-6.33112	2.68984e-06	0.000180219	down	yes
Zm00001d033629	0.00635267	0.475115	-6.22477	1.26058e-12	4.63564e-10	down	yes
Zm00001d017032	0.285976	18.2589	-5.99656	0.000852585	0.0225554	down	yes
Zm00001d023279	0.0917933	5.00607	-5.76914	0.000422671	0.0134759	down	yes
Zm00001d007427	0.0258524	1.20216	-5.53919	0.00110469	0.0270825	down	yes
Zm00001d021982	0.022429	1.02106	-5.50857	8.12387e-06	0.000492316	down	yes
Zm00001d038202	0.0756253	2.91432	-5.26815	1.31927e-09	1.84818e-07	down	yes
Zm00001d031880	0.00830433	0.303929	-5.19373	0.000888018	0.0231938	down	yes
Zm00001d029958	0.018041	0.609395	-5.07803	0.000168223	0.0064731	down	yes
Zm00001d040500	0.0406933	1.31056	-5.00925	0.000575402	0.0168817	down	yes
Zm00001d021205	0.02325	0.746598	-5.00503	0.00110814	0.0271464	down	yes
Zm00001d020206	0.0803807	2.57589	-5.00208	0.000547749	0.016277	down	yes
Zm00001d006253	0.00783433	0.250734	-5.0002	0.000487172	0.0149577	down	yes
Zm00001d051451	0.0401713	1.28207	-4.99616	0.000267142	0.00936912	down	yes
Zm00001d041157	0.0479607	1.52654	-4.99227	3.37856e-05	0.00170037	down	yes
Zm00001d045958	0.0220537	0.64668	-4.87396	0.000612983	0.0177749	down	yes
Zm00001d025199	0.00737738	0.213339	-4.85389	0.00220562	0.0439508	down	yes
Zm00001d048625	1.94191	55.7784	-4.84416	1.58878e-14	8.90445e-12	down	yes
Zm00001d005777	0.0264238	0.691917	-4.71069	4.3215e-06	0.000280512	down	yes
Zm00001d051995	0.047485	1.17771	-4.63237	3.5196e-06	0.000231499	down	yes
Zm00001d028295	0.0177993	0.384945	-4.43476	2.0156e-05	0.00109629	down	yes
Zm00001d016333	0.035158	0.733413	-4.3827	8.71194e-05	0.00378426	down	yes
Zm00001d009376	0.0352843	0.714578	-4.33999	0.000225325	0.00818376	down	yes
Zm00001d013723	0.090967	1.64082	-4.17293	0.000131861	0.00534366	down	yes
Zm00001d037911	0.0307741	0.524918	-4.0923	5.60569e-05	0.00261016	down	yes
Zm00001d035097	0.086141	1.46132	-4.08442	1.05596e-07	8.92217e-06	down	yes
Zm00001d035304	3.20709	53.5295	-4.061	3.49116e-09	4.27945e-07	down	yes
Zm00001d039493	0.825349	13.5903	-4.04143	0.000197663	0.00737784	down	yes
Zm00001d049692	0.087787	1.43375	-4.02964	1.1466e-12	4.31456e-10	down	yes
Zm00001d036003	0.294291	4.72446	-4.00483	0.000351628	0.0117068	down	yes
Zm00001d042779	0.0622067	0.997275	-4.00285	0.00108896	0.0269419	down	yes
Zm00001d028348	0.258495	3.952	-3.93438	0.000515601	0.0156523	down	yes
Zm00001d006939	1.98569	30.3137	-3.93226	2.26927e-28	3.86504e-25	down	yes
Zm00001d038456	0.148402	2.21647	-3.90068	0.000158353	0.00618898	down	yes
Zm00001d003411	3.98668	58.5021	-3.87523	1.84217e-17	1.49036e-14	down	yes
Zm00001d010295	0.025576	0.370227	-3.85555	0.00250414	0.04815	down	yes
Zm00001d005679	0.0244994	0.344878	-3.81527	2.01924e-07	1.63361e-05	down	yes
Zm00001d025697	0.0718757	1.00286	-3.80247	4.39569e-11	1.18541e-08	down	yes
Zm00001d052254	0.054584	0.730292	-3.74192	0.00105812	0.026462	down	yes
Zm00001d003062	0.185436	2.45874	-3.72893	0.000318816	0.0108533	down	yes
Zm00001d053955	0.0428527	0.562615	-3.71469	0.0010815	0.0268392	down	yes
Zm00001d021455	0.118652	1.52414	-3.68318	0.00128366	0.0301893	down	yes
Zm00001d036929	0.420446	5.34147	-3.66724	0.000763169	0.0208457	down	yes
Zm00001d007845	0.189379	2.36367	-3.64168	0.00065551	0.0187559	down	yes
Zm00001d012889	0.112592	1.38056	-3.61607	0.000509405	0.0155079	down	yes
Zm00001d041148	0.249536	2.89627	-3.53688	1.05728e-10	2.42241e-08	down	yes
Zm00001d042675	0.0597665	0.655135	-3.45438	0.000793589	0.0214727	down	yes
Zm00001d048099	0.0440241	0.466593	-3.4058	0.00172123	0.0372073	down	yes
Zm00001d046202	1.20956	12.5832	-3.37894	3.95636e-05	0.0019517	down	yes
Zm00001d003425	0.129899	1.33006	-3.35602	0.00145355	0.0328941	down	yes
Zm00001d024008	0.054445	0.547576	-3.33019	5.29449e-06	0.000335951	down	yes
Zm00001d039749	0.0624217	0.617782	-3.30698	1.60446e-07	1.31782e-05	down	yes
Zm00001d051143	0.336754	3.21301	-3.25416	0.000905584	0.0235576	down	yes
Zm00001d051945	0.0780284	0.701402	-3.16817	3.61646e-08	3.28387e-06	down	yes
Zm00001d025795	0.0650823	0.551122	-3.08203	0.00193454	0.0402596	down	yes
Zm00001d051789	0.24435	2.04298	-3.06365	0.000886782	0.0231938	down	yes
Zm00001d009309	2.16158	17.4239	-3.01091	3.65594e-13	1.55671e-10	down	yes
Zm00001d046489	1.18774	9.27065	-2.96445	0.00180514	0.0384318	down	yes
Zm00001d002410	0.677195	5.26697	-2.95933	1.31768e-09	1.84818e-07	down	yes
Zm00001d043400	1.18975	9.19009	-2.94942	2.93308e-09	3.69329e-07	down	yes
Zm00001d024522	2.9039	22.3387	-2.94348	0.00111749	0.0273322	down	yes
Zm00001d004867	2.20343	16.7977	-2.93044	0.000411166	0.013174	down	yes
Zm00001d045545	0.0732433	0.551144	-2.91166	0.00158406	0.0349671	down	yes
Zm00001d014885	0.43983	3.30131	-2.90802	0.000268218	0.00937345	down	yes
Zm00001d001036	1.11465	8.2293	-2.88418	1.62005e-10	3.44911e-08	down	yes
Zm00001d017288	0.698286	5.10257	-2.86933	1.7721e-05	0.000978617	down	yes
Zm00001d017399	0.0671846	0.487739	-2.85991	0.00204581	0.0417957	down	yes
Zm00001d013560	0.301579	2.18653	-2.85803	0.00187571	0.0394667	down	yes
Zm00001d022791	0.395941	2.84956	-2.84739	9.08277e-05	0.00392427	down	yes
Zm00001d008193	0.0715919	0.498669	-2.80022	0.0022452	0.044577	down	yes
Zm00001d027541	1.59684	10.9498	-2.77761	0.00240647	0.0468018	down	yes
Zm00001d026524	0.0417317	0.28386	-2.76596	0.000130103	0.00528929	down	yes
Zm00001d052392	0.936377	6.35671	-2.76312	4.8552e-13	1.98885e-10	down	yes
Zm00001d003392	0.163387	1.10646	-2.75959	0.00075696	0.0207769	down	yes
Zm00001d045047	3.17884	21.3379	-2.74685	4.1327e-05	0.00202634	down	yes
Zm00001d004358	0.113921	0.753449	-2.72548	0.00029799	0.0102825	down	yes
Zm00001d035901	5.06492	32.388	-2.67685	0.000536083	0.0160234	down	yes
Zm00001d017033	3.682	23.438	-2.67029	0.00024212	0.00868836	down	yes
Zm00001d002712	0.0522882	0.328991	-2.65349	0.000368166	0.0120711	down	yes
Zm00001d043701	0.292144	1.83433	-2.6505	0.00128728	0.0302306	down	yes
Zm00001d018241	1.23804	7.76811	-2.6495	3.33937e-05	0.00168589	down	yes
Zm00001d024946	1.93326	12.0659	-2.64183	0.00138335	0.0318851	down	yes
Zm00001d051473	0.280362	1.7419	-2.6353	5.56818e-06	0.000350568	down	yes
Zm00001d014315	13.7902	85.3163	-2.62918	0.000778238	0.0211457	down	yes
Zm00001d032545	0.121465	0.739646	-2.6063	7.82404e-05	0.00346366	down	yes
Zm00001d006283	0.379968	2.26856	-2.57783	0.00251342	0.0482998	down	yes
Zm00001d016185	1.40112	8.26745	-2.56086	0.00155718	0.0345212	down	yes
Zm00001d021973	0.0500323	0.292034	-2.5452	0.000635531	0.0183301	down	yes
Zm00001d021280	0.128468	0.742631	-2.53124	0.0005582	0.0164817	down	yes
Zm00001d040003	1.65949	9.55755	-2.5259	0.000227553	0.00823696	down	yes
Zm00001d048476	0.165669	0.946516	-2.51433	0.00013632	0.00548005	down	yes
Zm00001d031923	0.214431	1.21981	-2.50808	2.57325e-07	2.02119e-05	down	yes
Zm00001d018107	1.39	7.65994	-2.46224	2.10996e-07	1.68594e-05	down	yes
Zm00001d036088	0.180011	0.989829	-2.45909	0.00102376	0.0258223	down	yes
Zm00001d026300	0.491173	2.68066	-2.44829	0.00140462	0.0321135	down	yes
Zm00001d048006	0.503186	2.71703	-2.43286	1.75746e-05	0.000972189	down	yes
Zm00001d033058	1.98507	10.7018	-2.43059	4.78212e-05	0.00228251	down	yes
Zm00001d018744	69.387	371.863	-2.42203	3.04291e-08	2.82154e-06	down	yes
Zm00001d052221	0.157845	0.840555	-2.41283	0.00056346	0.0165916	down	yes
Zm00001d018229	0.522745	2.75566	-2.39822	1.15186e-09	1.67153e-07	down	yes
Zm00001d021736	0.470122	2.44583	-2.37922	0.000161767	0.006292	down	yes
Zm00001d015378	1.63998	8.5279	-2.37852	0.00115748	0.0280159	down	yes
Zm00001d045515	0.135938	0.705834	-2.37638	0.00234233	0.0458839	down	yes
Zm00001d003865	14.7425	75.9265	-2.36462	4.43104e-05	0.00215305	down	yes
Zm00001d029190	1.28706	6.54204	-2.34567	0.000139797	0.0056059	down	yes
Zm00001d009583	0.323829	1.62894	-2.33063	8.23223e-05	0.0036147	down	yes
Zm00001d008381	0.764791	3.84627	-2.33032	0.000962874	0.0246321	down	yes
Zm00001d047425	0.785481	3.94505	-2.3284	0.000455252	0.014248	down	yes
Zm00001d018475	3.84634	19.1664	-2.31702	6.47578e-05	0.00295575	down	yes
Zm00001d019593	0.470126	2.33518	-2.31242	0.000832821	0.0222484	down	yes
Zm00001d018106	0.893061	4.29758	-2.26669	2.29266e-09	2.94416e-07	down	yes
Zm00001d039600	0.370115	1.72858	-2.22354	0.00115306	0.0279717	down	yes
Zm00001d009985	1.49404	6.97177	-2.22231	0.00242061	0.0470189	down	yes
Zm00001d044081	0.192982	0.89856	-2.21915	6.96051e-05	0.00314155	down	yes
Zm00001d002733	1.00103	4.57148	-2.19117	0.00181259	0.0385649	down	yes
Zm00001d037547	6.75269	30.443	-2.17258	0.000308268	0.0105565	down	yes
Zm00001d028916	0.420724	1.89032	-2.16768	0.000466239	0.0145049	down	yes
Zm00001d042800	2.13083	9.56615	-2.16652	0.00122174	0.0291353	down	yes
Zm00001d033279	2.48905	11.1497	-2.16333	0.00179163	0.0381692	down	yes
Zm00001d007240	4.46975	19.727	-2.14191	2.90219e-49	2.34795e-45	down	yes
Zm00001d013879	14.1499	62.2921	-2.13825	0.000578776	0.0169654	down	yes
Zm00001d025059	1.6714	7.33463	-2.13366	5.87167e-09	6.57132e-07	down	yes
Zm00001d042861	0.163569	0.715989	-2.13004	4.80946e-06	0.000307691	down	yes
Zm00001d003107	0.405077	1.77207	-2.12917	7.12407e-06	0.000435213	down	yes
Zm00001d053770	0.333286	1.45432	-2.12551	9.75956e-06	0.000577384	down	yes
Zm00001d043943	0.204827	0.889964	-2.11934	0.000316401	0.0108007	down	yes
Zm00001d018184	41.2094	176.889	-2.1018	0.0016759	0.0364965	down	yes
Zm00001d002929	0.334689	1.43656	-2.10173	3.6227e-08	3.28387e-06	down	yes
Zm00001d014201	0.60187	2.56121	-2.0893	0.000297719	0.0102825	down	yes
Zm00001d022547	1.28758	5.4677	-2.08627	5.68454e-06	0.000356506	down	yes
Zm00001d044966	0.246804	1.04555	-2.08283	0.000999371	0.0253057	down	yes
Zm00001d047679	0.477025	2.01582	-2.07923	0.00027909	0.00972188	down	yes
Zm00001d044815	3.07339	12.889	-2.06824	8.83101e-08	7.54038e-06	down	yes
Zm00001d013097	0.393799	1.64225	-2.06015	0.00026134	0.00924285	down	yes
Zm00001d017209	2.6518	11.0382	-2.05746	0.000302068	0.0103895	down	yes
Zm00001d029777	3.1573	13.0607	-2.04847	3.17857e-05	0.0016179	down	yes
Zm00001d029921	0.641502	2.6278	-2.03433	0.000942776	0.0242714	down	yes
Zm00001d017698	0.973537	3.98595	-2.03362	0.00260643	0.0493543	down	yes
Zm00001d008966	0.216931	0.887665	-2.03278	0.000352421	0.0117151	down	yes
Zm00001d037114	1.33161	5.41584	-2.02402	0.00182912	0.038789	down	yes

## Sheet: UP
Supplementary Table S3 DEGs regulated leaf angle under IAA treatment group
gene_id	FPKM.b112_I	FPKM.WT_I	log2(fc) (b112_I VS B73_I)	pval (b112_I VS B73_I)	qval (b112_I VS B73_I)	regulation	significant
Zm00001d007084	98.4298	0.199762	8.94467	8.33129e-87	2.69609e-82	up	yes
Zm00001d029756	61.3654	0.475057	7.01318	1.89676e-61	3.06905e-57	up	yes
Zm00001d029755	11.1106	0.259744	5.4187	2.92868e-51	3.15916e-47	up	yes
Zm00001d007018	64.3746	0.025988	11.2744	1.63123e-48	1.05577e-44	up	yes
Zm00001d027606	10.6489	0.0136067	9.61218	6.56073e-44	3.03303e-40	up	yes
Zm00001d007026	9.6062	0.0169853	9.14353	1.7142e-33	5.54733e-30	up	yes
Zm00001d039546	6.12989	0	15.9036	1.41342e-29	3.26712e-26	up	yes
Zm00001d007889	14.2689	2.66872	2.41866	6.68174e-29	1.35142e-25	up	yes
Zm00001d018195	7.26008	0.206912	5.1329	2.99931e-28	4.85303e-25	up	yes
Zm00001d002735	7.60827	0.941726	3.01419	1.31621e-27	1.93608e-24	up	yes
Zm00001d035405	3.04577	0.00326567	9.86521	4.17811e-27	5.8786e-24	up	yes
Zm00001d003445	19.0488	0	17.5393	2.02651e-25	2.70969e-22	up	yes
Zm00001d017831	3.92777	0	15.2614	4.72223e-21	5.09387e-18	up	yes
Zm00001d049882	14.2046	0	17.116	1.42781e-20	1.35898e-17	up	yes
Zm00001d007370	5.41464	0	15.7246	1.34512e-19	1.2437e-16	up	yes
Zm00001d007166	4.22102	0	15.3653	1.79801e-19	1.61626e-16	up	yes
Zm00001d052064	3.81092	0.009682	8.62062	1.72898e-18	1.47241e-15	up	yes
Zm00001d007072	83.813	18.9953	2.14153	1.19121e-17	9.8843e-15	up	yes
Zm00001d011486	12.4402	2.13447	2.54306	5.98869e-17	4.40454e-14	up	yes
Zm00001d000472	1.27742	0	13.6409	1.21003e-16	8.70171e-14	up	yes
Zm00001d007064	0.616481	0	12.5898	2.14252e-15	1.30819e-12	up	yes
Zm00001d031221	11.5517	2.17558	2.40863	1.1252e-14	6.50226e-12	up	yes
Zm00001d051251	21.1101	1.97267	3.41971	1.59593e-14	8.90445e-12	up	yes
Zm00001d031303	40.6997	6.15595	2.72496	1.71871e-14	9.42697e-12	up	yes
Zm00001d050272	1.48011	0	13.8534	9.7224e-14	4.76707e-11	up	yes
Zm00001d052372	1.69484	0	14.0489	1.15776e-13	5.59196e-11	up	yes
Zm00001d037721	1.7799	0.203258	3.13041	1.34934e-13	6.15012e-11	up	yes
Zm00001d003435	3.57378	0	15.1252	1.73699e-13	7.7001e-11	up	yes
Zm00001d039634	1.59762	0.218597	2.86958	6.39091e-13	2.5852e-10	up	yes
Zm00001d021851	18.3763	3.60378	2.35026	8.39531e-13	3.35408e-10	up	yes
Zm00001d024676	71.1519	9.04978	2.97495	9.76791e-13	3.8451e-10	up	yes
Zm00001d028471	352.835	22.1422	3.99412	1.04467e-12	4.0199e-10	up	yes
Zm00001d035056	0.329677	0	11.6868	1.2347e-12	4.59266e-10	up	yes
Zm00001d005073	2.26466	0	14.467	2.22764e-12	7.92184e-10	up	yes
Zm00001d035032	26.765	5.82189	2.20079	3.83686e-12	1.28005e-09	up	yes
Zm00001d016183	1.35569	0	13.7267	3.98515e-12	1.31595e-09	up	yes
Zm00001d007396	1.05318	0	13.3625	6.82018e-12	2.20708e-09	up	yes
Zm00001d012036	7.80795	0.69806	3.48352	1.48414e-11	4.57412e-09	up	yes
Zm00001d052827	5.11991	0.942097	2.44217	1.60409e-11	4.82424e-09	up	yes
ENSRNA049997133	135.386	3.74909	5.17439	1.61002e-11	4.82424e-09	up	yes
Zm00001d021247	1.35088	0.017208	6.29468	1.65916e-11	4.89428e-09	up	yes
Zm00001d035079	54.8408	7.44406	2.88109	2.08856e-11	6.089e-09	up	yes
Zm00001d015340	0.649254	0.00791214	6.35857	8.10468e-11	1.94278e-08	up	yes
Zm00001d003676	0.725081	0	12.8239	1.06295e-10	2.42241e-08	up	yes
Zm00001d042317	31.7087	4.37359	2.85799	2.28698e-10	4.65466e-08	up	yes
Zm00001d044382	23.524	5.38595	2.12686	3.46048e-10	6.47309e-08	up	yes
Zm00001d003496	1.02271	0	13.3201	5.28168e-10	9.18927e-08	up	yes
Zm00001d014114	0.291882	0	11.5112	5.86397e-10	9.98758e-08	up	yes
Zm00001d034759	4.98681	0.813198	2.61644	7.95189e-10	1.25527e-07	up	yes
Zm00001d026952	1.41499	0	13.7885	1.40388e-09	1.94149e-07	up	yes
Zm00001d046937	29.7928	4.85594	2.61714	2.197e-09	2.89013e-07	up	yes
Zm00001d003386	11.8979	2.66136	2.16048	2.28192e-09	2.94203e-07	up	yes
Zm00001d004633	7.48355	0.925739	3.01505	2.56857e-09	3.28544e-07	up	yes
Zm00001d046234	50.502	12.5249	2.01154	2.92847e-09	3.69329e-07	up	yes
Zm00001d047358	1.02941	0.0113567	6.50213	3.68851e-09	4.45388e-07	up	yes
Zm00001d043237	0.799038	0	12.964	4.79099e-09	5.50842e-07	up	yes
Zm00001d034986	1.22286	0.011472	6.736	5.02973e-09	5.71113e-07	up	yes
Zm00001d017782	24.6575	4.9762	2.30891	5.61284e-09	6.30685e-07	up	yes
Zm00001d045054	4.77027	0.868209	2.45796	5.88883e-09	6.57132e-07	up	yes
Zm00001d037182	0.828747	0.0921977	3.16813	6.21281e-09	6.86187e-07	up	yes
Zm00001d048123	2.87563	0	14.8116	7.45308e-09	8.09359e-07	up	yes
Zm00001d027538	0.72851	0.00258233	8.14013	7.66547e-09	8.2964e-07	up	yes
Zm00001d039539	1.0118	0	13.3046	1.02802e-08	1.07663e-06	up	yes
Zm00001d004102	0.979719	0	13.2582	1.04703e-08	1.08948e-06	up	yes
Zm00001d007071	1.01448	0	13.3085	1.26569e-08	1.27997e-06	up	yes
Zm00001d007264	1.94212	0.172636	3.49183	1.52376e-08	1.50796e-06	up	yes
Zm00001d031300	59.8952	11.9272	2.32818	1.53378e-08	1.51326e-06	up	yes
Zm00001d002198	1.07549	0.213248	2.3344	2.09659e-08	2.01928e-06	up	yes
Zm00001d008837	4.49778	0.368509	3.60944	2.64297e-08	2.47194e-06	up	yes
Zm00001d030557	3.41317	0.70875	2.26776	3.54061e-08	3.23666e-06	up	yes
Zm00001d004248	116.95	26.3878	2.14795	4.14745e-08	3.71789e-06	up	yes
Zm00001d045145	0.816896	0	12.9959	4.87767e-08	4.30099e-06	up	yes
Zm00001d045190	14.9045	2.73863	2.44422	5.03559e-08	4.41617e-06	up	yes
Zm00001d037797	41.3902	10.172	2.02469	5.32771e-08	4.65973e-06	up	yes
Zm00001d027557	79.6043	16.9014	2.2357	7.36842e-08	6.34174e-06	up	yes
Zm00001d027098	6.6622	0.415681	4.00245	9.19685e-08	7.81153e-06	up	yes
Zm00001d044520	12.1027	2.43873	2.31112	9.64908e-08	8.17419e-06	up	yes
Zm00001d047864	3.55183	0.30062	3.56255	1.12814e-07	9.48257e-06	up	yes
Zm00001d035080	35.8628	1.49152	4.58763	1.18546e-07	9.93851e-06	up	yes
Zm00001d024839	58.9343	11.127	2.40505	1.25886e-07	1.04995e-05	up	yes
Zm00001d038484	4.61578	0.778715	2.56741	1.45516e-07	1.20436e-05	up	yes
Zm00001d052210	3.73964	0.58626	2.67329	1.88765e-07	1.54258e-05	up	yes
Zm00001d018237	0.257767	0	11.3319	1.9218e-07	1.5626e-05	up	yes
Zm00001d051478	2.49511	0.282087	3.14489	2.06651e-07	1.66354e-05	up	yes
Zm00001d052474	2.20451	0.0383413	5.84541	2.09385e-07	1.6772e-05	up	yes
Zm00001d007046	0.369779	0	11.8524	2.2879e-07	1.81468e-05	up	yes
Zm00001d002673	6.56608	1.48588	2.14372	2.34628e-07	1.85643e-05	up	yes
Zm00001d052139	0.314689	0	11.6197	2.54373e-07	2.00286e-05	up	yes
Zm00001d051556	6.90429	1.5412	2.16343	2.91555e-07	2.27899e-05	up	yes
Zm00001d036262	16.6804	3.94007	2.08186	3.89363e-07	3.0144e-05	up	yes
Zm00001d048064	2.25761	0.309896	2.86494	4.19519e-07	3.21708e-05	up	yes
Zm00001d030556	13.9434	3.4161	2.02916	4.32028e-07	3.29737e-05	up	yes
Zm00001d007378	7.9659	1.49304	2.41559	4.46586e-07	3.39248e-05	up	yes
Zm00001d042258	5.70066	1.02082	2.48141	4.88187e-07	3.68257e-05	up	yes
Zm00001d019031	0.121502	0	10.2468	5.82196e-07	4.37133e-05	up	yes
Zm00001d000805	3.2195	0.0356057	6.49859	7.2834e-07	5.41835e-05	up	yes
Zm00001d048660	17.3047	0.462313	5.22615	8.89414e-07	6.57131e-05	up	yes
Zm00001d044908	12.79	2.67638	2.25667	9.62212e-07	7.0608e-05	up	yes
Zm00001d008458	5.57215	0.912595	2.61019	1.10726e-06	8.03407e-05	up	yes
Zm00001d052011	6.19488	0.00899127	9.42834	1.12335e-06	8.13257e-05	up	yes
Zm00001d052192	3.10241	0.623206	2.31561	1.31196e-06	9.37223e-05	up	yes
Zm00001d053845	668.832	155.332	2.10629	1.43643e-06	0.000102163	up	yes
Zm00001d011123	3.89086	0.24678	3.97879	1.46436e-06	0.000103921	up	yes
Zm00001d000800	0.961645	0.146854	2.71112	1.49711e-06	0.000106013	up	yes
Zm00001d028303	15.9568	3.01385	2.4045	1.53993e-06	0.00010857	up	yes
Zm00001d015216	32.3127	3.65545	3.14398	1.59281e-06	0.000111811	up	yes
Zm00001d036838	2.82113	0.475483	2.56881	1.83507e-06	0.000127709	up	yes
Zm00001d010118	0.759353	0.0412733	4.20149	2.30692e-06	0.000156508	up	yes
Zm00001d002710	0.408284	0.00258233	7.30475	2.46567e-06	0.000166233	up	yes
Zm00001d026859	41.1878	7.18648	2.51886	2.70665e-06	0.000180971	up	yes
Zm00001d047547	0.195485	0	10.9328	2.79704e-06	0.000186629	up	yes
Zm00001d052338	0.815523	0	12.9935	2.83909e-06	0.000188657	up	yes
Zm00001d009570	36.8888	3.27127	3.49526	3.06737e-06	0.000202992	up	yes
Zm00001d031395	5.52976	0.688103	3.00652	3.11984e-06	0.000205624	up	yes
Zm00001d033924	23.859	4.66026	2.35605	3.99605e-06	0.000260718	up	yes
Zm00001d013630	4.38207	0.691501	2.66381	4.61775e-06	0.000297679	up	yes
zma-MIR398b	8.06305	0.184408	5.45036	5.69792e-06	0.000356655	up	yes
Zm00001d029696	44.5195	8.5521	2.38009	5.74358e-06	0.000358818	up	yes
Zm00001d018619	2.81592	0.341634	3.04308	6.176e-06	0.00038509	up	yes
Zm00001d002514	28.3433	5.17887	2.4523	6.72897e-06	0.000413985	up	yes
Zm00001d009736	2.30079	0.32939	2.80426	6.87273e-06	0.000422028	up	yes
Zm00001d052433	16.9759	3.67678	2.20697	7.1278e-06	0.000435213	up	yes
Zm00001d001372	19.9089	4.84178	2.03981	7.63855e-06	0.000464645	up	yes
Zm00001d001360	1.70751	0.185827	3.19986	8.15863e-06	0.000493498	up	yes
Zm00001d052807	1.0243	0	13.3224	8.52644e-06	0.00051287	up	yes
Zm00001d007251	3.13145	0.749796	2.06226	8.62727e-06	0.000517972	up	yes
Zm00001d045845	5.88196	1.17443	2.32434	1.02585e-05	0.000604689	up	yes
Zm00001d035246	34.3793	5.08452	2.75735	1.06764e-05	0.000625904	up	yes
Zm00001d043350	0.346173	0.00605659	5.83684	1.12655e-05	0.00065451	up	yes
Zm00001d039826	24.2858	5.58207	2.12124	1.2786e-05	0.000733631	up	yes
Zm00001d003358	4.61077	1.09587	2.07293	1.31712e-05	0.000754394	up	yes
Zm00001d046582	0.0867803	0	9.76122	1.32717e-05	0.000758809	up	yes
ENSRNA049997441	7.17676	0.163713	5.45409	1.35635e-05	0.000774123	up	yes
Zm00001d001230	0.901641	0.0152463	5.88602	1.43385e-05	0.000814326	up	yes
Zm00001d021695	4.32131	0.499365	3.1133	1.44967e-05	0.00082159	up	yes
Zm00001d046596	0.713033	0.021425	5.0566	1.58097e-05	0.000887354	up	yes
Zm00001d043839	4.86827	0.988404	2.30024	1.64434e-05	0.000917455	up	yes
Zm00001d007827	162.847	33.4612	2.28296	1.74002e-05	0.000964525	up	yes
Zm00001d042739	4.09837	0.63596	2.68804	1.78171e-05	0.000982246	up	yes
Zm00001d012383	0.374137	0.0344357	3.44159	1.88718e-05	0.00103623	up	yes
Zm00001d049744	1.17822	0.052164	4.49741	1.89245e-05	0.00103623	up	yes
Zm00001d021135	7.33862	1.08937	2.75202	1.91441e-05	0.00104649	up	yes
Zm00001d034150	0.276239	0	11.4317	2.24312e-05	0.00119983	up	yes
Zm00001d001313	0.198998	0.0196023	3.34366	2.50815e-05	0.00132913	up	yes
Zm00001d038029	10.9947	1.79383	2.61569	2.56404e-05	0.00135138	up	yes
Zm00001d035020	1.00677	0.160756	2.64679	2.70804e-05	0.00140842	up	yes
Zm00001d052211	7.19989	1.04498	2.7845	3.04746e-05	0.0015629	up	yes
Zm00001d036261	2.39363	0.417924	2.51789	3.15063e-05	0.0016107	up	yes
Zm00001d022965	81.2733	10.4012	2.96604	3.23659e-05	0.00164168	up	yes
Zm00001d008485	1.72758	0.236641	2.86798	3.27591e-05	0.00165902	up	yes
Zm00001d004705	5.0006	1.05052	2.251	3.48418e-05	0.00174268	up	yes
Zm00001d043968	2.57762	0.527137	2.28979	3.9226e-05	0.00193801	up	yes
Zm00001d042742	0.100228	0	9.96907	4.01171e-05	0.001976	up	yes
Zm00001d006947	0.745736	0.0426963	4.12648	4.52274e-05	0.00219103	up	yes
Zm00001d025814	25.8214	5.73781	2.17	4.85565e-05	0.00230508	up	yes
Zm00001d006397	12.6216	3.02802	2.05944	5.0479e-05	0.00237435	up	yes
Zm00001d003091	9.1053	0.981011	3.21437	5.17745e-05	0.00242235	up	yes
Zm00001d047165	0.246896	0	11.2697	5.17989e-05	0.00242235	up	yes
Zm00001d006883	5.03809	1.05017	2.26226	5.60416e-05	0.00261016	up	yes
Zm00001d010499	1.94732	0.253725	2.94015	5.74374e-05	0.00266676	up	yes
Zm00001d025533	10.1808	1.71337	2.57095	5.90225e-05	0.00273084	up	yes
Zm00001d011736	0.220872	0	11.109	5.99427e-05	0.00276326	up	yes
Zm00001d002181	8.70423	2.14706	2.01935	6.41354e-05	0.00293978	up	yes
Zm00001d039099	9.21137	2.00924	2.19677	6.76664e-05	0.00306259	up	yes
Zm00001d004072	1.69839	0.353197	2.26563	7.62587e-05	0.0033852	up	yes
Zm00001d020483	0.64711	0.083456	2.95492	7.63938e-05	0.00338655	up	yes
Zm00001d021168	19.083	2.81419	2.76149	8.14363e-05	0.00358553	up	yes
Zm00001d034045	0.348355	0.012323	4.82113	8.28821e-05	0.00363435	up	yes
Zm00001d001063	0.430367	0	12.0714	8.70425e-05	0.00378426	up	yes
Zm00001d028013	1.03268	0.197662	2.38529	9.31071e-05	0.0040067	up	yes
Zm00001d044526	5.1026	0.699281	2.86729	9.97242e-05	0.00424628	up	yes
Zm00001d030121	0.358241	0.0454983	2.97704	0.000111548	0.00462219	up	yes
Zm00001d046343	3.65463	0.885225	2.04561	0.000114817	0.00473926	up	yes
Zm00001d031697	0.167192	0	10.7073	0.00012241	0.00500797	up	yes
Zm00001d043266	0.353997	0.0543088	2.70448	0.000128499	0.00523724	up	yes
Zm00001d042619	16.4685	3.77967	2.12338	0.000177979	0.00678395	up	yes
Zm00001d027073	2.14267	0.171471	3.64338	0.000179701	0.00681747	up	yes
Zm00001d036900	0.548294	0.0236217	4.53677	0.000181598	0.00686531	up	yes
Zm00001d012403	27.5761	5.45689	2.33727	0.000198682	0.00739657	up	yes
Zm00001d053324	16.0915	1.00325	4.00354	0.00022147	0.00807094	up	yes
Zm00001d015779	1.47311	0.216327	2.76758	0.000226235	0.00820762	up	yes
Zm00001d030990	0.740026	0.139023	2.41225	0.000243733	0.00872504	up	yes
Zm00001d010736	0.743053	0.112797	2.71974	0.00024614	0.00879176	up	yes
Zm00001d039323	0.568548	0.0305293	4.21901	0.000249082	0.00887723	up	yes
Zm00001d049803	11.0197	2.09044	2.39821	0.000293144	0.0101459	up	yes
Zm00001d048875	0.764526	0.033656	4.50563	0.000315805	0.0107917	up	yes
Zm00001d050768	3.58151	0.870865	2.04005	0.00032357	0.0109644	up	yes
Zm00001d031351	10.9302	1.54345	2.82408	0.000328234	0.0110993	up	yes
Zm00001d042867	33.9073	3.27315	3.37284	0.000336131	0.0113268	up	yes
Zm00001d020279	0.217901	0	11.0895	0.000337063	0.0113268	up	yes
Zm00001d010845	5.2939	0.830945	2.67151	0.000345913	0.0115641	up	yes
Zm00001d000556	8.00518	1.88927	2.0831	0.000354476	0.0117492	up	yes
Zm00001d051541	0.237048	0.006509	5.1866	0.000372489	0.0122005	up	yes
Zm00001d048736	3.88767	0.621235	2.64569	0.000383974	0.0124632	up	yes
Zm00001d006525	1.17663	0.17868	2.71921	0.000386475	0.0125192	up	yes
Zm00001d002168	1.30563	0.313632	2.05761	0.000394981	0.0127565	up	yes
Zm00001d018617	4.34517	0.771689	2.49332	0.000427221	0.0135942	up	yes
Zm00001d001039	0.419764	0	12.0354	0.000428936	0.0136354	up	yes
Zm00001d010321	5.67279	1.09211	2.37695	0.000453614	0.0142104	up	yes
Zm00001d025255	2.29183	0.34346	2.73829	0.000525439	0.0158765	up	yes
Zm00001d043898	1.69105	0.342041	2.30568	0.000601078	0.0174923	up	yes
Zm00001d049204	3.48174	0.657885	2.4039	0.000669364	0.0190345	up	yes
Zm00001d029101	3.29311	0.735227	2.16319	0.000674052	0.0191175	up	yes
Zm00001d051472	1.32892	0.322119	2.04459	0.000676422	0.0191256	up	yes
Zm00001d047316	0.50138	0.02121	4.56309	0.000701363	0.0196679	up	yes
Zm00001d049594	0.445757	0.083148	2.4225	0.000748403	0.0206295	up	yes
Zm00001d048776	0.512877	0	12.3244	0.000766475	0.0208787	up	yes
Zm00001d012261	0.748888	0.175612	2.09236	0.000779211	0.0211544	up	yes
Zm00001d015053	2.26756	0.52384	2.11394	0.000790029	0.0213942	up	yes
zma-MIR396e	1.21454	0	13.5681	0.000855087	0.0225705	up	yes
Zm00001d012619	0.158369	0	10.6291	0.000937868	0.0241836	up	yes
Zm00001d024500	7.77637	1.90843	2.02671	0.00104918	0.026279	up	yes
Zm00001d028816	0.326399	0	11.6724	0.00106337	0.0265727	up	yes
Zm00001d042750	0.83869	0.0441047	4.24914	0.0010652	0.0265754	up	yes
Zm00001d045770	1.28208	0.177743	2.85062	0.00109427	0.0269907	up	yes
Zm00001d017381	9.63486	2.35504	2.03251	0.00113566	0.0276325	up	yes
zma-MIR408b	5.60123	0.494433	3.5019	0.00123414	0.029323	up	yes
Zm00001d030540	0.873201	0.151816	2.52399	0.00124323	0.0294742	up	yes
Zm00001d001303	1.18443	0.0992357	3.57719	0.00126291	0.0298097	up	yes
Zm00001d018210	0.195665	0	10.9342	0.00127491	0.0300055	up	yes
Zm00001d038831	0.608383	0.05933	3.35815	0.00135522	0.0314382	up	yes
Zm00001d007130	2.58536	0.584713	2.14456	0.00136108	0.031529	up	yes
ENSRNA049997253	1.12391	0	13.4562	0.00138829	0.0319192	up	yes
Zm00001d007015	2.95995	0.575909	2.36166	0.00138878	0.0319192	up	yes
Zm00001d018980	0.0690683	0	9.43188	0.00142276	0.0324011	up	yes
Zm00001d018700	4.3944	0.757977	2.53544	0.00148907	0.0335104	up	yes
Zm00001d024478	1.08773	0.122849	3.14636	0.00149673	0.0336358	up	yes
Zm00001d036263	1.51818	0.299699	2.34076	0.00150336	0.0337381	up	yes
Zm00001d043651	8.71442	1.50932	2.52951	0.00155959	0.0345212	up	yes
Zm00001d026336	0.969769	0.128382	2.91719	0.00162402	0.0356049	up	yes
Zm00001d002160	24.3146	5.97372	2.02512	0.00164774	0.0360774	up	yes
Zm00001d022215	0.109959	0	10.1027	0.00172878	0.0373216	up	yes
Zm00001d035570	4.12599	0.197186	4.38711	0.00188938	0.0395833	up	yes
Zm00001d012976	1.42842	0.126827	3.49348	0.00197696	0.0407752	up	yes
ENSRNA049997515	4.86671	0.452488	3.42699	0.00205483	0.041927	up	yes
Zm00001d034322	0.342064	0.048687	2.81266	0.0020757	0.0422393	up	yes
ZeamMp088	0.0572687	0	9.1616	0.00236251	0.0461502	up	yes
