# Supplementary material for: Morphological characterization and transcriptome analysis of leaf angle mutant bhlh112 in maize [Zea mays L.]
Source: Front Plant Sci. 2022 Oct 7;13:995815. doi: 10.3389/fpls.2022.995815 (PMC9585351; doi:10.3389/fpls.2022.995815)
Supplement: Supplementary file 4 [file Table_4.xlsx]

## Sheet: DOWN
Supplementary Table S4 DEGs regulated leaf angle in bhlh112 under ABA treatment group
gene_id	FPKM.b112_A	FPKM.b112_CK	log2(fc) (b112_A VS b112_CK)	pval (b112_A VS b112_CK)	qval (b112_A VS b112_CK)	regulation	significant
Zm00001d007728	0	1.55261	-13.9224	5.73809e-08	3.80834e-06	down	yes
Zm00001d027932	0	1.34418	-13.7144	1.90211e-10	1.93051e-08	down	yes
Zm00001d051798	0	0.787018	-12.9422	0.0023325	0.0462358	down	yes
Zm00001d003784	0	0.777075	-12.9238	2.03179e-12	2.69126e-10	down	yes
Zm00001d052190	0	0.751364	-12.8753	1.71061e-06	8.8386e-05	down	yes
Zm00001d044875	0	0.636759	-12.6365	4.83292e-05	0.00173406	down	yes
Zm00001d032176	0	0.511719	-12.3211	0.000378338	0.0101506	down	yes
Zm00001d038316	0	0.499349	-12.2858	2.9743e-05	0.00113363	down	yes
Zm00001d039574	0	0.463574	-12.1786	0.000947996	0.0219189	down	yes
Zm00001d044372	0	0.43639	-12.0914	1.10054e-09	9.60978e-08	down	yes
Zm00001d031880	0	0.42046	-12.0378	2.49125e-05	0.000973456	down	yes
Zm00001d012419	0	0.339764	-11.7303	9.70309e-05	0.00319283	down	yes
Zm00001d024234	0	0.337799	-11.7219	8.31879e-06	0.000370435	down	yes
Zm00001d039573	0	0.317559	-11.6328	0.00166536	0.0349859	down	yes
Zm00001d024441	0	0.280517	-11.4539	0.00221676	0.0443921	down	yes
Zm00001d008912	0	0.274939	-11.4249	0.000426929	0.0112718	down	yes
Zm00001d024851	0	0.248721	-11.2803	0.000121908	0.00387538	down	yes
Zm00001d018093	0	0.230145	-11.1683	1.87841e-05	0.000762587	down	yes
Zm00001d022904	0	0.228299	-11.1567	0.00235548	0.0465098	down	yes
Zm00001d046526	0	0.222149	-11.1173	0.0010352	0.0236035	down	yes
Zm00001d007616	0	0.218437	-11.093	1.00899e-05	0.000438071	down	yes
Zm00001d013960	0	0.207816	-11.0211	4.77594e-06	0.000225522	down	yes
Zm00001d024850	0	0.207046	-11.0157	5.07415e-05	0.00180864	down	yes
Zm00001d006375	0	0.200609	-10.9702	0.000136657	0.00425912	down	yes
Zm00001d023495	0	0.189895	-10.891	7.11421e-06	0.000323242	down	yes
Zm00001d034231	0	0.182744	-10.8356	0.000108655	0.0035161	down	yes
Zm00001d007361	0	0.15862	-10.6314	0.00241468	0.0473248	down	yes
Zm00001d046262	0	0.156204	-10.6092	0.00137164	0.0298174	down	yes
Zm00001d019692	0	0.138683	-10.4376	4.17844e-05	0.00153308	down	yes
Zm00001d007618	0	0.136749	-10.4173	0.000776597	0.0185458	down	yes
Zm00001d011655	0	0.126327	-10.303	0.00179864	0.0373343	down	yes
Zm00001d016632	0	0.106777	-10.0604	0.00117475	0.0262305	down	yes
Zm00001d008586	0	0.051866	-9.01865	0.0023377	0.046251	down	yes
Zm00001d005892	0.0209197	6.02729	-8.17051	1.16971e-22	5.71331e-20	down	yes
Zm00001d006169	0.00793633	1.37764	-7.43952	4.43193e-07	2.51611e-05	down	yes
Zm00001d036963	0.00243567	0.332804	-7.09421	0.00110826	0.0249599	down	yes
Zm00001d021205	0.121858	14.9883	-6.94249	2.99291e-06	0.000148662	down	yes
Zm00001d001694	0.0215737	1.64146	-6.24957	1.11693e-10	1.1756e-08	down	yes
Zm00001d044387	0.109728	7.86788	-6.16397	0.000555489	0.0139587	down	yes
Zm00001d016730	0.004217	0.263378	-5.96478	0.000605963	0.0150337	down	yes
Zm00001d027206	0.004629	0.287136	-5.95489	0.00250465	0.0487518	down	yes
Zm00001d011656	0.0877663	5.36549	-5.9339	1.19588e-31	1.09951e-28	down	yes
Zm00001d050798	0.0224077	1.28512	-5.84177	2.32888e-06	0.000117992	down	yes
Zm00001d038665	0.009164	0.522917	-5.83446	2.81572e-06	0.000140606	down	yes
Zm00001d031811	0.00998847	0.560403	-5.81006	9.11898e-08	5.82943e-06	down	yes
Zm00001d023348	0.0239413	1.29854	-5.76125	1.65739e-05	0.000685317	down	yes
Zm00001d023346	0.0113003	0.61028	-5.75503	0.00193667	0.039543	down	yes
Zm00001d042063	0.113743	6.01033	-5.7236	3.18561e-22	1.46444e-19	down	yes
Zm00001d014613	0.123844	6.33321	-5.67634	2.07538e-20	7.63253e-18	down	yes
Zm00001d024324	0.293361	14.3777	-5.61501	2.90563e-34	3.13207e-31	down	yes
Zm00001d031044	0.01569	0.747588	-5.57433	2.99407e-06	0.000148662	down	yes
Zm00001d051460	0.084467	3.82377	-5.50046	2.037e-20	7.58053e-18	down	yes
Zm00001d024494	0.0159633	0.684062	-5.42129	0.00079427	0.0189389	down	yes
Zm00001d011434	0.077846	3.28471	-5.399	1.94009e-08	1.37835e-06	down	yes
Zm00001d029353	0.0108383	0.45638	-5.39602	1.36919e-05	0.000574507	down	yes
Zm00001d021160	0.0339663	1.32105	-5.28144	0.000848687	0.0200075	down	yes
Zm00001d017606	0.0148497	0.575388	-5.27603	5.8113e-06	0.000270329	down	yes
Zm00001d021677	0.178232	6.69674	-5.23163	6.15526e-17	1.51507e-14	down	yes
Zm00001d043740	0.114198	4.23085	-5.21134	2.09634e-19	6.82621e-17	down	yes
Zm00001d030304	0.178401	6.58074	-5.20506	7.84006e-34	8.16935e-31	down	yes
Zm00001d014493	0.366971	13.3261	-5.18244	1.77684e-12	2.37368e-10	down	yes
Zm00001d039297	0.0295237	1.06701	-5.17556	5.23761e-05	0.00185212	down	yes
Zm00001d017243	0.075252	2.6795	-5.15409	5.29336e-09	4.14713e-07	down	yes
Zm00001d002410	1.27624	44.7678	-5.13248	1.31566e-38	1.78815e-35	down	yes
Zm00001d021208	1.18054	39.7238	-5.07249	4.69021e-52	1.62907e-48	down	yes
Zm00001d018288	0.07842	2.57647	-5.03803	6.52187e-06	0.000298497	down	yes
Zm00001d022435	1.64472	52.2844	-4.99047	2.03787e-43	3.74729e-40	down	yes
Zm00001d036003	0.690045	21.901	-4.98816	0.000821347	0.0195101	down	yes
Zm00001d036726	0.703174	22.0246	-4.96909	7.84668e-42	1.36271e-38	down	yes
Zm00001d029668	0.586631	17.1324	-4.86813	1.22038e-52	5.44988e-49	down	yes
Zm00001d018819	0.163142	4.73788	-4.86004	0.000397022	0.0106167	down	yes
Zm00001d009309	4.182	118.087	-4.81951	4.13558e-30	3.49401e-27	down	yes
Zm00001d029667	0.624847	17.3375	-4.79425	5.54408e-47	1.33314e-43	down	yes
Zm00001d039524	2.3174	63.0909	-4.76685	9.76333e-13	1.35645e-10	down	yes
Zm00001d020408	0.00577233	0.157097	-4.76636	0.00137442	0.0298571	down	yes
Zm00001d003538	1.06646	28.0609	-4.71766	5.73198e-37	6.8916e-34	down	yes
Zm00001d043318	0.33677	8.80027	-4.70771	2.47502e-14	4.37113e-12	down	yes
Zm00001d009945	0.0497483	1.27509	-4.67981	6.77091e-07	3.69387e-05	down	yes
Zm00001d053995	0.143447	3.65678	-4.67199	6.76647e-14	1.09031e-11	down	yes
Zm00001d014843	0.0263753	0.669898	-4.66668	0.000134835	0.00423188	down	yes
Zm00001d009985	1.71815	43.4145	-4.65925	1.13967e-23	6.03832e-21	down	yes
Zm00001d046995	0.0218717	0.546178	-4.64224	0.000480456	0.0124022	down	yes
Zm00001d046805	0.0754673	1.85959	-4.62299	9.97224e-09	7.4756e-07	down	yes
Zm00001d020163	0.037871	0.926269	-4.61227	0.000187236	0.00562246	down	yes
Zm00001d033385	0.490136	11.9595	-4.60883	1.53192e-26	1.06417e-23	down	yes
Zm00001d008209	0.606928	14.7853	-4.6065	0.000757399	0.0182265	down	yes
Zm00001d048294	0.250514	5.91255	-4.56082	2.14711e-14	3.85739e-12	down	yes
Zm00001d032120	2.2631	52.458	-4.53479	6.73484e-24	3.69353e-21	down	yes
Zm00001d035306	0.318462	7.35598	-4.52972	1.20086e-18	3.44394e-16	down	yes
Zm00001d050689	0.255458	5.87497	-4.52342	4.96293e-45	9.69632e-42	down	yes
Zm00001d053746	1.34317	30.827	-4.52048	6.3392e-83	1.98163e-78	down	yes
Zm00001d009328	0.571252	12.8931	-4.49633	8.96599e-30	7.37571e-27	down	yes
Zm00001d021816	0.619513	13.4801	-4.44355	5.15949e-32	4.88745e-29	down	yes
Zm00001d018107	2.78625	60.3621	-4.43725	1.87753e-32	1.89328e-29	down	yes
Zm00001d017294	0.0416517	0.899604	-4.43284	0.00128533	0.028196	down	yes
Zm00001d039487	0.009787	0.20618	-4.3969	0.00139407	0.0301792	down	yes
Zm00001d028374	0.262477	5.52648	-4.3961	7.78812e-17	1.87274e-14	down	yes
Zm00001d016401	0.58844	12.2858	-4.38395	8.13089e-08	5.21913e-06	down	yes
Zm00001d034787	0.253925	5.24086	-4.36733	3.63405e-07	2.12604e-05	down	yes
Zm00001d013313	0.953865	19.5398	-4.35649	1.51802e-08	1.08838e-06	down	yes
Zm00001d047674	0.066464	1.35932	-4.35417	5.18078e-05	0.00183834	down	yes
Zm00001d009705	0.064022	1.30286	-4.34698	8.71182e-11	9.35847e-09	down	yes
Zm00001d012482	0.121605	2.44042	-4.32685	1.82103e-24	1.08193e-21	down	yes
Zm00001d017648	0.0964863	1.93241	-4.32393	3.87872e-05	0.0014349	down	yes
Zm00001d034130	0.651079	12.837	-4.30133	1.02141e-13	1.59646e-11	down	yes
Zm00001d016719	1.29485	25.4715	-4.29802	6.75896e-65	7.04284e-61	down	yes
Zm00001d023090	0.0568977	1.10647	-4.28145	0.000934864	0.0216955	down	yes
Zm00001d026657	1.04409	20.161	-4.27124	1.10648e-19	3.71919e-17	down	yes
Zm00001d012956	0.346895	6.60958	-4.25199	1.25936e-06	6.60529e-05	down	yes
Zm00001d027522	0.135915	2.54204	-4.22521	5.72063e-10	5.24419e-08	down	yes
Zm00001d033883	0.0611153	1.11263	-4.1863	0.000236786	0.00684729	down	yes
Zm00001d012642	0.080169	1.43236	-4.1592	2.86187e-05	0.00110175	down	yes
Zm00001d011735	0.0183507	0.317859	-4.11448	0.00191547	0.0391869	down	yes
Zm00001d052530	0.873799	15.102	-4.1113	7.49858e-13	1.06066e-10	down	yes
Zm00001d047055	0.0434753	0.745885	-4.10068	2.97328e-08	2.06086e-06	down	yes
Zm00001d007697	0.0245657	0.399867	-4.02481	0.00110703	0.0249501	down	yes
Zm00001d021973	0.08115	1.32079	-4.02467	5.4594e-18	1.49702e-15	down	yes
Zm00001d043128	0.121327	1.94131	-4.00006	2.16572e-05	0.000863527	down	yes
Zm00001d010385	0.212253	3.37732	-3.99202	2.86448e-14	4.94716e-12	down	yes
Zm00001d044373	0.141627	2.25007	-3.9898	2.14291e-07	1.30326e-05	down	yes
Zm00001d014491	10.638	168.022	-3.98136	6.17227e-58	3.8589e-54	down	yes
Zm00001d006170	0.676689	10.5457	-3.96202	3.25434e-18	9.0831e-16	down	yes
Zm00001d020265	0.0399727	0.620966	-3.95743	0.000763259	0.0183252	down	yes
Zm00001d008073	0.273895	4.19101	-3.93561	0.000420772	0.0111562	down	yes
Zm00001d050247	0.516234	7.85808	-3.92808	6.25293e-29	4.76748e-26	down	yes
Zm00001d050864	0.339466	5.12099	-3.91508	1.16833e-07	7.36331e-06	down	yes
Zm00001d037165	0.0713057	1.07047	-3.90809	4.71245e-05	0.00169713	down	yes
Zm00001d049060	1.95062	28.999	-3.894	3.01653e-19	9.42967e-17	down	yes
Zm00001d003903	0.668512	9.84208	-3.87994	7.97416e-13	1.12285e-10	down	yes
Zm00001d034642	0.264155	3.79684	-3.84534	2.87614e-10	2.84519e-08	down	yes
Zm00001d034783	0.492819	7.07679	-3.84397	3.27541e-23	1.67851e-20	down	yes
Zm00001d007175	2.03675	28.6788	-3.81564	1.28149e-46	2.86139e-43	down	yes
Zm00001d007726	0.121661	1.70365	-3.80768	0.00053868	0.013646	down	yes
Zm00001d032102	1.82076	25.2474	-3.79352	2.51566e-16	5.78232e-14	down	yes
Zm00001d048263	2.92145	39.98	-3.77452	5.868e-17	1.46443e-14	down	yes
Zm00001d014253	0.641174	8.47462	-3.72436	7.74805e-07	4.19764e-05	down	yes
Zm00001d013097	0.842584	11.1233	-3.72262	5.41954e-20	1.92517e-17	down	yes
Zm00001d002364	1.32862	17.5272	-3.7216	5.75808e-13	8.25677e-11	down	yes
Zm00001d027988	6.76477	89.1517	-3.72015	2.59762e-21	1.06844e-18	down	yes
Zm00001d033957	1.10507	14.5004	-3.71389	2.51027e-19	8.00725e-17	down	yes
Zm00001d002618	5.24535	66.5939	-3.66628	0.000158857	0.00486374	down	yes
Zm00001d002592	0.965609	11.9553	-3.63007	1.79459e-12	2.38719e-10	down	yes
Zm00001d033050	3.14065	38.5113	-3.61615	1.47223e-05	0.000613626	down	yes
Zm00001d034461	0.89744	10.9795	-3.61286	2.74892e-14	4.77396e-12	down	yes
Zm00001d027979	0.056402	0.688341	-3.60931	0.000359346	0.0097341	down	yes
Zm00001d003485	0.163197	1.98366	-3.60348	0.00180624	0.0374174	down	yes
Zm00001d028838	0.980514	11.8463	-3.59475	3.57427e-13	5.29534e-11	down	yes
Zm00001d027338	0.692293	8.12233	-3.55244	2.83365e-24	1.64037e-21	down	yes
Zm00001d001832	0.12741	1.49121	-3.54893	0.000501771	0.0128695	down	yes
Zm00001d051313	0.0978403	1.12769	-3.5268	7.66282e-07	4.16591e-05	down	yes
Zm00001d010218	0.206371	2.36128	-3.51626	7.87999e-05	0.0026544	down	yes
Zm00001d012505	0.264761	3.0285	-3.51584	2.96998e-07	1.76841e-05	down	yes
Zm00001d044688	1.12445	12.7623	-3.5046	1.30919e-16	3.07708e-14	down	yes
Zm00001d011752	0.149431	1.68547	-3.4956	0.00134953	0.0293777	down	yes
Zm00001d029356	0.741256	8.19922	-3.46744	1.6997e-10	1.74206e-08	down	yes
Zm00001d002620	0.25521	2.79956	-3.45545	0.000143638	0.00444128	down	yes
Zm00001d015025	5.55047	60.6759	-3.45044	3.32286e-21	1.349e-18	down	yes
Zm00001d039150	0.0342717	0.374362	-3.44934	0.000200037	0.00591723	down	yes
Zm00001d012321	2.36892	25.297	-3.41667	1.28769e-48	3.65938e-45	down	yes
Zm00001d042887	1.57554	16.7237	-3.40798	1.50775e-15	3.12135e-13	down	yes
Zm00001d015227	0.255777	2.70996	-3.40531	6.14256e-14	1.00532e-11	down	yes
Zm00001d051468	2.64036	27.9188	-3.40243	1.33768e-15	2.82539e-13	down	yes
Zm00001d034508	0.460495	4.86537	-3.40129	1.41156e-12	1.94385e-10	down	yes
Zm00001d016120	0.18529	1.91271	-3.36776	2.08962e-06	0.000106561	down	yes
Zm00001d021216	0.0465429	0.476389	-3.35551	0.00183832	0.0379813	down	yes
Zm00001d026076	0.164251	1.6789	-3.35354	1.14821e-13	1.77546e-11	down	yes
Zm00001d047728	0.122313	1.24199	-3.34401	0.000176314	0.00532005	down	yes
Zm00001d017084	0.892041	8.9751	-3.33075	5.90269e-17	1.46443e-14	down	yes
Zm00001d013947	0.135155	1.32039	-3.28828	0.000171427	0.00521286	down	yes
Zm00001d007729	0.980785	9.57553	-3.28734	2.74623e-06	0.000137576	down	yes
Zm00001d034547	0.0812347	0.78387	-3.27045	7.06255e-05	0.00240854	down	yes
Zm00001d027355	4.52789	43.5049	-3.26427	1.59756e-19	5.25682e-17	down	yes
Zm00001d042593	0.097295	0.932161	-3.26014	0.000775798	0.0185409	down	yes
Zm00001d030303	0.037953	0.363243	-3.25865	0.00183998	0.0379907	down	yes
Zm00001d001907	1.51111	14.2561	-3.23791	6.10593e-25	3.89533e-22	down	yes
Zm00001d015614	1.081	10.1785	-3.23508	7.19609e-38	8.99799e-35	down	yes
Zm00001d027901	12.0297	111.731	-3.21536	3.07625e-32	3.00511e-29	down	yes
Zm00001d033389	3.78276	34.9051	-3.20592	6.4243e-14	1.04054e-11	down	yes
Zm00001d051496	0.613625	5.63612	-3.19927	1.58788e-11	1.92392e-09	down	yes
Zm00001d004908	0.76084	6.97619	-3.19677	1.00436e-14	1.86883e-12	down	yes
Zm00001d025319	0.3841	3.50714	-3.19074	1.63344e-08	1.16845e-06	down	yes
Zm00001d032561	0.5212	4.7517	-3.18854	2.49881e-14	4.38836e-12	down	yes
Zm00001d040460	0.359597	3.27565	-3.18733	5.81188e-12	7.29637e-10	down	yes
Zm00001d025141	2.46556	22.3763	-3.18198	1.19119e-13	1.82533e-11	down	yes
Zm00001d014166	1.01499	9.19215	-3.17894	7.63897e-24	4.11714e-21	down	yes
Zm00001d034453	3.33785	29.9571	-3.16591	2.30047e-14	4.10929e-12	down	yes
Zm00001d011228	1.50664	13.5003	-3.16358	7.52886e-19	2.263e-16	down	yes
Zm00001d043025	0.819694	7.33082	-3.16082	2.28817e-19	7.37403e-17	down	yes
Zm00001d009939	2.03497	18.0931	-3.15236	9.05806e-21	3.53944e-18	down	yes
Zm00001d009487	3.57335	31.614	-3.14522	5.76374e-29	4.50436e-26	down	yes
Zm00001d040682	0.0454983	0.399604	-3.13469	0.000370975	0.00998853	down	yes
Zm00001d008573	2.93667	25.6561	-3.12705	1.46502e-14	2.69391e-12	down	yes
Zm00001d032265	0.625922	5.4494	-3.12204	1.31011e-24	8.1908e-22	down	yes
Zm00001d033862	0.572035	4.97154	-3.11952	1.41687e-24	8.68461e-22	down	yes
Zm00001d043060	0.510186	4.43398	-3.11951	7.54273e-08	4.86156e-06	down	yes
Zm00001d020137	8.56286	74.3172	-3.11753	5.71651e-62	4.46745e-58	down	yes
Zm00001d033049	0.397703	3.45152	-3.11747	0.000215677	0.00630922	down	yes
Zm00001d043702	1.8509	15.6676	-3.08148	7.6449e-09	5.81459e-07	down	yes
Zm00001d023253	0.555114	4.68728	-3.07789	9.70673e-07	5.21362e-05	down	yes
Zm00001d044769	15.5945	130.056	-3.06003	0.00214883	0.0431421	down	yes
Zm00001d018106	1.66772	13.6946	-3.03766	0.000210153	0.00616265	down	yes
Zm00001d013163	3.98533	32.6224	-3.03309	1.08382e-21	4.64112e-19	down	yes
Zm00001d042107	4.59601	37.0994	-3.01294	4.74105e-17	1.2148e-14	down	yes
Zm00001d052208	0.567786	4.55085	-3.00272	1.86674e-10	1.90079e-08	down	yes
Zm00001d052152	0.580759	4.62215	-2.99255	0.00206471	0.0416405	down	yes
Zm00001d016379	13.8283	109.621	-2.98683	1.15587e-15	2.458e-13	down	yes
Zm00001d048316	14.2204	112.548	-2.98451	7.7725e-17	1.87274e-14	down	yes
Zm00001d003504	4.44635	35.0834	-2.98009	9.90879e-19	2.89485e-16	down	yes
Zm00001d017699	3.37627	26.3786	-2.96587	4.01593e-05	0.00147692	down	yes
Zm00001d013550	0.15431	1.20165	-2.96111	0.000357705	0.00970648	down	yes
Zm00001d013109	4.5247	35.1985	-2.95962	2.74912e-05	0.00106096	down	yes
Zm00001d025503	1.2479	9.70618	-2.95941	2.12866e-05	0.000849832	down	yes
Zm00001d052205	0.516935	4.01073	-2.95581	1.11607e-05	0.000478203	down	yes
Zm00001d025005	0.403393	3.11493	-2.94894	2.02879e-06	0.000103628	down	yes
Zm00001d006948	0.0731143	0.563814	-2.94699	2.34594e-05	0.000924768	down	yes
Zm00001d013834	1.82226	14.0236	-2.94405	1.27214e-34	1.47285e-31	down	yes
Zm00001d017570	0.0518417	0.397729	-2.9396	0.000251161	0.00719641	down	yes
Zm00001d040461	1.12082	8.58245	-2.93683	3.1611e-09	2.59885e-07	down	yes
Zm00001d038448	3.16267	24.1407	-2.93225	8.56594e-22	3.71904e-19	down	yes
Zm00001d044752	2.13833	16.3166	-2.93178	1.99046e-48	5.18514e-45	down	yes
Zm00001d044010	0.430191	3.27047	-2.92645	5.29518e-08	3.52937e-06	down	yes
Zm00001d013071	0.454173	3.43042	-2.91707	7.60041e-12	9.46569e-10	down	yes
Zm00001d008756	3.84551	28.7088	-2.90025	2.45974e-51	7.68914e-48	down	yes
Zm00001d044300	9.08896	67.5353	-2.89345	6.27622e-24	3.50348e-21	down	yes
Zm00001d052189	0.279898	2.03124	-2.85938	9.51992e-08	6.07332e-06	down	yes
Zm00001d046988	0.111127	0.803626	-2.85432	0.000488124	0.0125483	down	yes
Zm00001d034221	3.88612	28.0674	-2.85249	5.1002e-14	8.43558e-12	down	yes
Zm00001d029506	3.65441	26.3547	-2.85035	6.0261e-13	8.60163e-11	down	yes
Zm00001d020429	2.92817	21.1015	-2.84927	1.45801e-12	1.99027e-10	down	yes
Zm00001d035039	6.64612	47.8296	-2.84732	5.48708e-39	7.79664e-36	down	yes
Zm00001d053815	0.526376	3.77653	-2.8429	1.77931e-05	0.000728026	down	yes
Zm00001d029955	0.743787	5.30758	-2.83509	3.65879e-08	2.4918e-06	down	yes
Zm00001d015289	2.40818	17.1231	-2.82993	1.40524e-20	5.35706e-18	down	yes
Zm00001d011589	0.312821	2.21704	-2.82523	7.92536e-06	0.00035647	down	yes
Zm00001d018491	2.08045	14.7125	-2.82207	8.57225e-14	1.35338e-11	down	yes
Zm00001d018225	0.180806	1.27722	-2.82049	0.00066375	0.0163248	down	yes
Zm00001d050514	2.0352	14.2016	-2.80281	1.02792e-08	7.66895e-07	down	yes
Zm00001d037008	0.042565	0.295898	-2.79736	0.000729193	0.0176429	down	yes
Zm00001d006511	1.76296	12.2255	-2.79382	3.12493e-30	2.79101e-27	down	yes
Zm00001d034205	4.22213	29.2078	-2.79031	1.48672e-12	2.0119e-10	down	yes
Zm00001d002623	0.603141	4.17081	-2.78976	3.52499e-09	2.87705e-07	down	yes
Zm00001d024458	0.576982	3.96587	-2.78104	2.11447e-05	0.000845248	down	yes
Zm00001d010543	0.0828257	0.568155	-2.77813	0.000221022	0.00645111	down	yes
Zm00001d040148	3.84712	26.3076	-2.77363	2.82598e-16	6.44819e-14	down	yes
Zm00001d012641	1.10334	7.51816	-2.7685	5.24512e-27	3.72642e-24	down	yes
Zm00001d020470	1.62724	11.0834	-2.7679	9.94515e-21	3.83809e-18	down	yes
Zm00001d038471	3.5149	23.9296	-2.76724	2.97383e-12	3.8414e-10	down	yes
Zm00001d021665	2.30435	15.6866	-2.7671	4.21138e-11	4.75262e-09	down	yes
Zm00001d042758	0.676921	4.58144	-2.75874	5.59497e-16	1.23168e-13	down	yes
Zm00001d016091	0.081982	0.551763	-2.75067	0.000371499	0.00999402	down	yes
Zm00001d043196	7.1713	48.134	-2.74675	5.6352e-10	5.19635e-08	down	yes
Zm00001d021303	0.798356	5.34493	-2.74307	8.01514e-22	3.52892e-19	down	yes
Zm00001d043706	2.57863	17.2108	-2.73863	8.54931e-10	7.61401e-08	down	yes
Zm00001d018973	16.9372	112.102	-2.72654	8.65372e-40	1.35258e-36	down	yes
Zm00001d018461	4.2402	27.9123	-2.71869	8.95418e-13	1.25519e-10	down	yes
Zm00001d047664	0.481891	3.16767	-2.71664	7.51976e-05	0.00254705	down	yes
Zm00001d028752	4.7295	30.843	-2.70518	2.08272e-26	1.41534e-23	down	yes
Zm00001d018807	0.428443	2.75943	-2.68719	1.76646e-11	2.12383e-09	down	yes
Zm00001d049061	12.6237	81.1553	-2.68455	1.63934e-23	8.54097e-21	down	yes
Zm00001d010956	3.38744	21.6462	-2.67585	9.55646e-19	2.81825e-16	down	yes
Zm00001d028826	1.2932	8.2616	-2.67548	5.73205e-19	1.75671e-16	down	yes
Zm00001d042800	1.13881	7.26794	-2.67402	3.11705e-18	8.77829e-16	down	yes
Zm00001d004138	16.4885	104.811	-2.66827	1.71194e-20	6.44761e-18	down	yes
Zm00001d026563	3.76144	23.83	-2.66342	3.82555e-52	1.49484e-48	down	yes
Zm00001d003249	0.663759	4.17871	-2.65433	3.62428e-13	5.34411e-11	down	yes
Zm00001d011639	0.731364	4.58642	-2.64871	7.26315e-14	1.16434e-11	down	yes
Zm00001d010630	0.700602	4.38018	-2.64432	2.38314e-09	1.99724e-07	down	yes
Zm00001d040048	2.1806	13.5626	-2.63684	9.88775e-10	8.73992e-08	down	yes
Zm00001d051302	1.48361	9.17969	-2.62933	2.34469e-13	3.54082e-11	down	yes
Zm00001d032401	0.206485	1.27623	-2.62777	0.000112997	0.00363403	down	yes
Zm00001d027900	5.23756	32.2402	-2.62189	1.89894e-11	2.27436e-09	down	yes
Zm00001d028093	11.4476	69.8108	-2.6084	2.25721e-18	6.41458e-16	down	yes
Zm00001d021576	2.91563	17.6768	-2.59997	1.07111e-18	3.10026e-16	down	yes
Zm00001d047864	0.435552	2.64063	-2.59996	0.000608691	0.0150789	down	yes
Zm00001d053410	1.22104	7.33464	-2.58661	3.54886e-07	2.08922e-05	down	yes
Zm00001d006330	4.55231	27.3413	-2.58641	2.73663e-12	3.54967e-10	down	yes
Zm00001d005664	1.13788	6.81938	-2.5833	7.245e-17	1.76937e-14	down	yes
Zm00001d039963	2.47177	14.7048	-2.57267	5.97424e-07	3.29373e-05	down	yes
Zm00001d021882	39.5175	231.757	-2.55205	5.90063e-17	1.46443e-14	down	yes
Zm00001d036768	0.75278	4.39075	-2.54417	0.000494295	0.0126965	down	yes
Zm00001d045460	6.50077	37.8469	-2.54149	5.56336e-20	1.95405e-17	down	yes
Zm00001d050195	2.8889	16.8122	-2.54092	4.63723e-14	7.71062e-12	down	yes
Zm00001d034418	0.26554	1.54403	-2.5397	0.000190172	0.00567251	down	yes
Zm00001d038780	6.51199	37.3924	-2.52158	2.79574e-39	4.16166e-36	down	yes
Zm00001d022460	0.356994	2.02277	-2.50236	2.38008e-05	0.000934691	down	yes
Zm00001d017268	0.926673	5.2366	-2.4985	1.1425e-06	6.04307e-05	down	yes
Zm00001d040399	1.79494	10.0923	-2.49125	4.36455e-10	4.10951e-08	down	yes
Zm00001d050961	4.33125	24.2782	-2.48681	9.82444e-26	6.53429e-23	down	yes
Zm00001d017276	0.453383	2.54122	-2.48672	2.58524e-09	2.15506e-07	down	yes
Zm00001d042214	5.72012	31.9692	-2.48257	2.0308e-53	1.05805e-49	down	yes
Zm00001d000502	1.27437	7.11862	-2.48181	1.03909e-05	0.000449665	down	yes
Zm00001d000914	1.08936	6.05948	-2.47571	3.40135e-10	3.28167e-08	down	yes
Zm00001d043258	1.95454	10.8075	-2.46713	4.4776e-07	2.53568e-05	down	yes
Zm00001d048226	2.78789	15.3556	-2.46152	1.91637e-10	1.9387e-08	down	yes
Zm00001d045051	2.123	11.5759	-2.44695	4.63551e-11	5.1568e-09	down	yes
Zm00001d034031	8.95725	48.8389	-2.4469	3.02173e-45	6.29729e-42	down	yes
Zm00001d022415	37.2187	202.239	-2.44196	4.47747e-15	8.63986e-13	down	yes
Zm00001d011396	25.2778	137.065	-2.43892	6.03945e-28	4.39054e-25	down	yes
Zm00001d013638	0.615184	3.33525	-2.4387	1.10496e-15	2.36583e-13	down	yes
Zm00001d038998	1.49053	8.06248	-2.4354	3.9288e-23	1.98087e-20	down	yes
Zm00001d006711	25.0091	134.343	-2.4254	1.61206e-21	6.80988e-19	down	yes
Zm00001d029028	25.5935	137.125	-2.42164	0.000470818	0.0122038	down	yes
Zm00001d020272	6.48679	34.7013	-2.41942	7.16552e-21	2.83537e-18	down	yes
Zm00001d053818	3.8946	20.8221	-2.41857	3.90348e-16	8.84222e-14	down	yes
Zm00001d044442	3.28184	17.4638	-2.41179	0.000845483	0.019947	down	yes
Zm00001d007764	0.82186	4.37136	-2.41112	4.77197e-16	1.07318e-13	down	yes
Zm00001d008489	0.255811	1.35792	-2.40825	0.000552301	0.0139044	down	yes
Zm00001d048533	7.10846	37.6128	-2.40361	1.13436e-19	3.77236e-17	down	yes
Zm00001d045557	18.1743	96.1517	-2.40341	2.76762e-13	4.13951e-11	down	yes
Zm00001d018326	5.49326	28.9021	-2.39544	8.13101e-16	1.75293e-13	down	yes
Zm00001d020521	0.932258	4.8983	-2.39348	9.58195e-09	7.21763e-07	down	yes
Zm00001d039944	3.35938	17.6237	-2.39125	1.20161e-05	0.000511052	down	yes
Zm00001d044253	6.37706	33.1719	-2.379	4.22973e-19	1.30912e-16	down	yes
Zm00001d017762	29.13	151.377	-2.37757	7.41866e-08	4.79147e-06	down	yes
Zm00001d011654	0.547963	2.84193	-2.37472	2.07304e-07	1.26817e-05	down	yes
Zm00001d028630	2.72311	14.03	-2.36519	1.05431e-09	9.23187e-08	down	yes
Zm00001d021977	1.41147	7.25931	-2.36263	0.000170485	0.00519937	down	yes
Zm00001d003185	0.132014	0.677155	-2.35879	0.000854526	0.0200997	down	yes
Zm00001d042909	21.5558	110.369	-2.35619	7.25183e-20	2.49112e-17	down	yes
Zm00001d051981	9.35941	47.8676	-2.35456	4.7389e-22	2.11626e-19	down	yes
Zm00001d017984	12.0795	61.5807	-2.34992	1.47332e-15	3.07041e-13	down	yes
Zm00001d039094	0.248897	1.2686	-2.34961	7.69031e-06	0.000346396	down	yes
Zm00001d028725	3.10502	15.778	-2.34524	6.24446e-19	1.89516e-16	down	yes
Zm00001d049643	2.69227	13.6021	-2.33693	1.65577e-15	3.38297e-13	down	yes
Zm00001d024753	0.114736	0.579513	-2.33652	0.00196975	0.0400354	down	yes
Zm00001d038766	0.831524	4.18974	-2.33303	1.34363e-14	2.48532e-12	down	yes
Zm00001d010617	1.17248	5.89903	-2.33091	6.01563e-11	6.57513e-09	down	yes
Zm00001d041387	1.32732	6.67622	-2.33052	9.84417e-17	2.34908e-14	down	yes
Zm00001d019505	16.7291	83.6684	-2.32233	3.11953e-11	3.57204e-09	down	yes
Zm00001d029711	0.499792	2.49871	-2.32178	0.00126567	0.0278821	down	yes
Zm00001d042461	3.90888	19.5	-2.31864	1.66982e-10	1.71706e-08	down	yes
Zm00001d009568	0.85716	4.26923	-2.31634	9.68281e-06	0.000421566	down	yes
Zm00001d037724	10.5322	52.4384	-2.31581	6.6333e-20	2.30397e-17	down	yes
Zm00001d050865	0.203961	1.0154	-2.31568	0.000237572	0.00685103	down	yes
Zm00001d003272	0.676527	3.36588	-2.31476	1.5239e-15	3.13402e-13	down	yes
Zm00001d036787	0.159824	0.79456	-2.31367	0.00149127	0.0319515	down	yes
Zm00001d008587	0.629663	3.12564	-2.3115	4.20799e-06	0.000203202	down	yes
Zm00001d008923	6.39175	31.6333	-2.30716	3.49093e-10	3.35774e-08	down	yes
Zm00001d019358	20.0644	98.9868	-2.3026	2.09996e-11	2.47717e-09	down	yes
Zm00001d046318	0.641326	3.16095	-2.30123	0.000367507	0.00990712	down	yes
Zm00001d003533	6.9426	34.2157	-2.30111	4.94822e-16	1.09703e-13	down	yes
Zm00001d006623	0.212897	1.04872	-2.30041	0.000378618	0.0101506	down	yes
Zm00001d036122	7.42082	36.2671	-2.28901	4.80386e-09	3.79214e-07	down	yes
Zm00001d052192	1.67796	8.19819	-2.28859	3.22794e-08	2.22749e-06	down	yes
Zm00001d035457	0.729873	3.55878	-2.28567	8.47778e-06	0.000375376	down	yes
Zm00001d045210	8.10424	39.4366	-2.28279	1.15319e-07	7.28259e-06	down	yes
Zm00001d007915	6.53233	31.7479	-2.28099	3.74082e-12	4.75358e-10	down	yes
Zm00001d042437	14.2715	69.1769	-2.27715	4.0013e-30	3.47446e-27	down	yes
Zm00001d031635	8.90366	43.0988	-2.27518	1.93164e-11	2.3047e-09	down	yes
Zm00001d005790	4.12522	19.9253	-2.27206	6.3847e-07	3.49537e-05	down	yes
Zm00001d022327	5.64804	27.1789	-2.26667	1.03474e-10	1.09277e-08	down	yes
Zm00001d028154	0.55782	2.68304	-2.266	5.40226e-05	0.00190604	down	yes
Zm00001d009187	4.76518	22.9133	-2.26559	8.78368e-07	4.74227e-05	down	yes
Zm00001d003830	5.23887	25.1368	-2.26247	2.00031e-07	1.22607e-05	down	yes
Zm00001d048588	0.226259	1.08499	-2.26163	7.50929e-06	0.00033922	down	yes
Zm00001d049364	5.26086	25.2048	-2.26033	9.33877e-13	1.30326e-10	down	yes
Zm00001d034494	4.12911	19.7531	-2.25818	1.6324e-34	1.82245e-31	down	yes
Zm00001d042115	3.70313	17.6931	-2.25637	2.42893e-07	1.4658e-05	down	yes
Zm00001d015164	3.43067	16.3822	-2.25557	2.72011e-07	1.63206e-05	down	yes
Zm00001d015515	26.8928	128.301	-2.25424	4.50081e-17	1.17246e-14	down	yes
Zm00001d031528	0.226952	1.08194	-2.25315	1.0863e-05	0.000466451	down	yes
Zm00001d042313	2.43468	11.5826	-2.25015	1.70189e-14	3.09309e-12	down	yes
Zm00001d031833	37.1267	174.497	-2.23268	8.1642e-14	1.2955e-11	down	yes
Zm00001d026662	41.1405	193.271	-2.23199	5.12099e-77	8.00411e-73	down	yes
Zm00001d050069	0.148031	0.693562	-2.22813	8.54762e-05	0.00284335	down	yes
Zm00001d051814	0.669307	3.1277	-2.22436	1.43882e-06	7.49627e-05	down	yes
Zm00001d003496	0.271941	1.26833	-2.22156	3.33075e-05	0.00125143	down	yes
Zm00001d036338	2.82697	13.1391	-2.21654	1.72251e-09	1.48335e-07	down	yes
Zm00001d015091	4.17723	19.3871	-2.21448	1.67065e-08	1.19234e-06	down	yes
Zm00001d006493	2.18158	10.0854	-2.20882	3.63861e-07	2.12604e-05	down	yes
Zm00001d051659	0.703361	3.24875	-2.20755	9.31127e-06	0.000408233	down	yes
Zm00001d002522	3.61233	16.6802	-2.20714	7.20484e-08	4.6824e-06	down	yes
Zm00001d029579	0.575885	2.65596	-2.20538	0.000441981	0.0115715	down	yes
Zm00001d037095	1.77289	8.15112	-2.20089	5.62264e-18	1.52838e-15	down	yes
Zm00001d008266	1.05951	4.86865	-2.20012	4.53379e-06	0.000215717	down	yes
Zm00001d017612	5.00648	22.9277	-2.19522	1.16824e-29	9.36386e-27	down	yes
Zm00001d022451	5.78436	26.414	-2.19107	1.04496e-19	3.55059e-17	down	yes
Zm00001d005936	1.14211	5.20508	-2.18821	1.74923e-05	0.000717598	down	yes
Zm00001d018058	0.503378	2.28966	-2.18542	2.00258e-09	1.71477e-07	down	yes
Zm00001d012418	0.188786	0.856416	-2.18156	0.000448118	0.0117027	down	yes
Zm00001d050308	0.148245	0.671014	-2.17836	0.000312109	0.00861885	down	yes
Zm00001d037477	4.139	18.7027	-2.17589	4.91384e-16	1.09703e-13	down	yes
Zm00001d020332	6.4028	28.8353	-2.17106	4.0645e-07	2.33989e-05	down	yes
Zm00001d029468	0.366255	1.64622	-2.16824	0.00133885	0.0292061	down	yes
Zm00001d047017	2.05424	9.21749	-2.16577	1.46351e-07	9.07725e-06	down	yes
Zm00001d002521	22.0108	98.1043	-2.15611	4.87997e-18	1.34998e-15	down	yes
Zm00001d047679	0.626628	2.79117	-2.15519	6.04471e-07	3.32132e-05	down	yes
Zm00001d005875	0.187927	0.831534	-2.1456	5.19966e-05	0.00184287	down	yes
Zm00001d044390	3.85087	17.0209	-2.14405	4.44845e-10	4.17594e-08	down	yes
Zm00001d034417	4.50889	19.9212	-2.14346	4.32744e-07	2.47305e-05	down	yes
Zm00001d030004	1.49277	6.58213	-2.14056	2.4641e-06	0.000124503	down	yes
Zm00001d038447	2.63895	11.6047	-2.13667	2.80767e-11	3.25066e-09	down	yes
Zm00001d047402	0.147314	0.646812	-2.13445	0.00120941	0.026851	down	yes
Zm00001d029662	0.626233	2.74904	-2.13416	0.000360388	0.00975029	down	yes
Zm00001d029777	5.41888	23.7681	-2.13296	1.0928e-06	5.78999e-05	down	yes
Zm00001d028686	2.78764	12.1328	-2.12179	2.84331e-19	8.97795e-17	down	yes
Zm00001d031682	0.135584	0.589593	-2.12053	0.000284678	0.00799554	down	yes
Zm00001d027483	5.65363	24.509	-2.11606	8.10047e-14	1.29194e-11	down	yes
Zm00001d043935	10.1111	43.6616	-2.11043	2.01095e-11	2.3902e-09	down	yes
Zm00001d027991	5.54591	23.8749	-2.106	1.26769e-10	1.32093e-08	down	yes
Zm00001d015100	22.3272	96.0485	-2.10496	5.48633e-15	1.04575e-12	down	yes
Zm00001d027739	0.612139	2.60372	-2.08864	5.79312e-05	0.00201663	down	yes
Zm00001d007015	0.441689	1.87762	-2.0878	0.00014682	0.00453518	down	yes
Zm00001d012899	6.64275	28.1369	-2.08261	8.80813e-06	0.000387806	down	yes
Zm00001d003048	1.2557	5.31648	-2.08197	2.8932e-25	1.88419e-22	down	yes
Zm00001d001276	7.95153	33.5764	-2.07814	4.61992e-10	4.32391e-08	down	yes
Zm00001d022678	1.66556	7.033	-2.07813	3.2738e-10	3.18813e-08	down	yes
Zm00001d047591	0.815327	3.44004	-2.07698	0.000939747	0.0217765	down	yes
Zm00001d048131	2.75797	11.6152	-2.07433	3.74064e-11	4.25209e-09	down	yes
Zm00001d018122	2.93712	12.3491	-2.07193	3.77013e-13	5.4816e-11	down	yes
Zm00001d029970	0.730719	3.06685	-2.06937	1.30922e-06	6.84383e-05	down	yes
Zm00001d052292	0.776249	3.24992	-2.06581	9.39926e-07	5.05716e-05	down	yes
Zm00001d038810	5.4361	22.7368	-2.06439	2.02068e-22	9.57348e-20	down	yes
Zm00001d004443	10.5165	43.9826	-2.06428	4.43498e-07	2.51611e-05	down	yes
Zm00001d017085	16.4408	68.376	-2.05621	3.53062e-12	4.50479e-10	down	yes
Zm00001d012473	0.693116	2.87914	-2.05447	0.000282358	0.00795182	down	yes
Zm00001d029578	0.719693	2.98915	-2.05428	0.000125801	0.00398031	down	yes
Zm00001d050462	0.518857	2.15148	-2.05192	0.000677526	0.0165723	down	yes
Zm00001d035035	1.16395	4.81213	-2.04765	2.89704e-05	0.00111255	down	yes
Zm00001d047104	9.08367	37.535	-2.04689	4.44649e-08	3.0021e-06	down	yes
Zm00001d035542	9.73227	40.214	-2.04685	4.13109e-07	2.37386e-05	down	yes
Zm00001d003742	6.55994	27.0262	-2.0426	2.97701e-10	2.92646e-08	down	yes
Zm00001d003743	1.41323	5.79542	-2.03592	6.41982e-09	4.95515e-07	down	yes
Zm00001d052346	2.71171	11.0997	-2.03324	7.88118e-09	5.96527e-07	down	yes
Zm00001d038884	0.579243	2.36753	-2.03114	2.31661e-09	1.95195e-07	down	yes
Zm00001d004380	1.61493	6.5803	-2.02668	2.18441e-08	1.53795e-06	down	yes
Zm00001d039711	5.34999	21.7424	-2.0229	1.28958e-10	1.33928e-08	down	yes
Zm00001d001862	12.9041	52.3637	-2.02074	8.14135e-11	8.77582e-09	down	yes
Zm00001d035467	1.3159	5.33155	-2.0185	1.27011e-11	1.55093e-09	down	yes
Zm00001d011638	4.15342	16.6757	-2.00537	6.09462e-10	5.53831e-08	down	yes
Zm00001d022437	8.19465	32.8978	-2.00524	1.77205e-10	1.81027e-08	down	yes

## Sheet: UP
Supplementary Table S4 DEGs regulated leaf angle in bhlh112 under ABA treatment group
gene_id	FPKM.b112_A	FPKM.b112_CK	log2(fc) (b112_A VS b112_CK)	pval (b112_A VS b112_CK)	qval (b112_A VS b112_CK)	regulation	significant
Zm00001d024285	0.629573	0.0274293	4.52058	0.00204451	0.0413226	up	yes
Zm00001d002754	2.53953	0.460275	2.464	0.000548081	0.0138375	up	yes
Zm00001d032024	11.121	2.47198	2.16954	5.73759e-09	4.47274e-07	up	yes
Zm00001d019527	0.7154	0.154678	2.20949	3.03755e-05	0.00115096	up	yes
Zm00001d001303	1.32862	0.280321	2.24478	0.000121989	0.00387538	up	yes
Zm00001d004292	16.3011	3.59364	2.18146	0.000381408	0.0102166	up	yes
Zm00001d004886	2.55778	0.447645	2.51447	0.000462895	0.0120184	up	yes
Zm00001d005076	0.227446	0.00560133	5.34361	0.00127647	0.028041	up	yes
Zm00001d006923	19.239	3.06748	2.64891	5.37163e-40	8.83774e-37	up	yes
Zm00001d010560	3.52179	0.829847	2.08539	7.09196e-10	6.37054e-08	up	yes
Zm00001d013728	0.630393	0.116266	2.43882	0.00238548	0.0468995	up	yes
Zm00001d014083	0.112297	0	10.1331	0.000398412	0.0106447	up	yes
Zm00001d018150	16.4171	3.76168	2.12575	4.83703e-09	3.8087e-07	up	yes
Zm00001d018633	1.46362	0.0612837	4.5779	2.90517e-05	0.00111306	up	yes
Zm00001d019590	1.32971	0.283446	2.22997	0.00166231	0.0349649	up	yes
Zm00001d019912	0.243426	0	11.2493	0.000283378	0.0079662	up	yes
Zm00001d026021	2.65819	0.66448	2.00015	0.000367635	0.00990712	up	yes
Zm00001d026457	9.7814	1.91265	2.35446	0.00105064	0.0239207	up	yes
Zm00001d027021	44.5343	0.0767093	9.1813	0.000207825	0.00611275	up	yes
Zm00001d029776	0.248286	0.00967992	4.68086	0.0010103	0.0231202	up	yes
Zm00001d030750	11.4583	2.66507	2.10414	7.74098e-05	0.00261603	up	yes
Zm00001d032771	3.39696	0.71493	2.24837	0.000356033	0.0096779	up	yes
Zm00001d033699	9.97605	1.83357	2.44382	0.000346143	0.00945016	up	yes
Zm00001d034052	2.13222	0.288897	2.88373	0.00225777	0.045069	up	yes
Zm00001d035955	4.29515	0.889843	2.27109	0.000296905	0.00825733	up	yes
Zm00001d036499	1.48516	0.195621	2.92449	0.00187435	0.0385581	up	yes
Zm00001d037081	0.218327	0	11.0923	9.84785e-07	5.2713e-05	up	yes
Zm00001d037515	1.56315	0.355213	2.1377	0.00063714	0.0157074	up	yes
Zm00001d038314	0.146917	0	10.5208	7.68348e-07	4.16989e-05	up	yes
Zm00001d039538	0.389181	0.009284	5.38955	0.00026725	0.00756724	up	yes
Zm00001d042376	2.44802	0.216204	3.50115	0.00083409	0.0197378	up	yes
Zm00001d044529	1.14771	0.112826	3.34658	4.34494e-10	4.10341e-08	up	yes
Zm00001d048064	5.19955	0.529457	3.2958	0.00122502	0.0271397	up	yes
Zm00001d049625	3.26342	0.803251	2.02246	0.000421665	0.0111611	up	yes
