# Supplementary material for: Morphological characterization and transcriptome analysis of leaf angle mutant bhlh112 in maize [Zea mays L.]
Source: Front Plant Sci. 2022 Oct 7;13:995815. doi: 10.3389/fpls.2022.995815 (PMC9585351; doi:10.3389/fpls.2022.995815)
Supplement: Supplementary file 5 [file Table_5.xlsx]

## Sheet: DOWN
Supplementary Table S5 DEGs regulated leaf angle in B73 under ABA treatment group
gene_id	FPKM.WT_A	FPKM.WT_CK	log2(fc) (WT_A VS WT_CK)	pval (WT_A VS WT_CK)	qval (WT_A VS WT_CK)	regulation	significant
Zm00001d052845	0.510726	2.06958	-2.01872	0.000441957	0.0185223	down	yes
Zm00001d005381	5.99005	24.95	-2.0584	0.000192307	0.0099503	down	yes
Zm00001d019399	2.09658	8.73665	-2.05904	0.00122331	0.0391281	down	yes
Zm00001d030556	2.51877	10.4983	-2.05936	9.61583e-07	9.71759e-05	down	yes
Zm00001d003434	2.21727	9.24449	-2.05981	2.63293e-05	0.00181849	down	yes
Zm00001d002457	0.252003	1.05602	-2.06713	1.62981e-05	0.00122033	down	yes
Zm00001d017121	0.253997	1.06555	-2.06872	0.000380359	0.0165753	down	yes
Zm00001d022009	0.256355	1.07643	-2.07004	0.000128396	0.00706177	down	yes
Zm00001d019163	52.0092	218.629	-2.07165	5.21845e-05	0.00328723	down	yes
Zm00001d024961	2.43554	10.5288	-2.11202	5.25433e-05	0.00329721	down	yes
Zm00001d024962	0.803642	3.49876	-2.12222	9.40855e-05	0.00542845	down	yes
Zm00001d007718	5.60188	24.8104	-2.14696	6.7615e-06	0.000563943	down	yes
Zm00001d040040	4.5527	20.2653	-2.15422	0.00020545	0.0102709	down	yes
Zm00001d002019	3.66545	16.344	-2.1567	0.000325648	0.0147277	down	yes
Zm00001d003524	2.30458	10.4181	-2.17651	0.000776735	0.027867	down	yes
Zm00001d006010	12.0287	54.6193	-2.18292	1.13003e-07	1.38914e-05	down	yes
Zm00001d006116	0.718986	3.31797	-2.20626	0.000103537	0.00592193	down	yes
Zm00001d016841	2.5441	11.8406	-2.21852	4.41197e-05	0.00283338	down	yes
Zm00001d029814	12.0511	56.7707	-2.23598	0.000204678	0.0102608	down	yes
Zm00001d029461	0.803799	3.801	-2.24147	3.62732e-05	0.00240447	down	yes
Zm00001d042337	1.8692	8.9878	-2.26555	0.000282275	0.0131908	down	yes
Zm00001d005375	4.34235	21.0787	-2.27923	1.93856e-05	0.00140848	down	yes
Zm00001d000892	0.335471	1.64382	-2.29279	0.000178825	0.00939618	down	yes
Zm00001d037945	1.29687	6.3926	-2.30137	7.58516e-05	0.00450258	down	yes
Zm00001d049678	0.293932	1.45183	-2.30432	0.000725869	0.02663	down	yes
Zm00001d011527	0.846712	4.21085	-2.31417	0.000193809	0.0099648	down	yes
Zm00001d048020	0.636594	3.17453	-2.3181	0.000214243	0.0106636	down	yes
Zm00001d003311	4.96544	25.3277	-2.35072	1.00788e-07	1.24362e-05	down	yes
Zm00001d022390	0.57978	2.98552	-2.36441	0.000667024	0.0250857	down	yes
Zm00001d032825	2.13084	10.9923	-2.367	1.18856e-06	0.000117237	down	yes
Zm00001d020362	1.11397	5.85522	-2.39401	2.1249e-06	0.000200014	down	yes
Zm00001d014643	0.79716	4.21098	-2.40121	0.000384597	0.0166937	down	yes
Zm00001d004624	1.75158	9.32724	-2.41279	6.31023e-05	0.00385697	down	yes
Zm00001d031993	0.912053	4.88338	-2.42069	6.74189e-05	0.00406798	down	yes
Zm00001d001649	0.505944	2.74832	-2.4415	0.000280309	0.0131363	down	yes
Zm00001d006402	3.95202	21.7127	-2.45788	8.2508e-07	8.44169e-05	down	yes
Zm00001d045055	1.1917	6.55604	-2.45981	0.001207	0.0386814	down	yes
Zm00001d004072	0.319645	1.7705	-2.46962	0.000950426	0.0323803	down	yes
Zm00001d005546	1.32603	7.35961	-2.47251	0.000218884	0.0108601	down	yes
Zm00001d013268	0.113663	0.635401	-2.48291	0.00154194	0.0465194	down	yes
Zm00001d029696	1.45991	8.16435	-2.48346	1.77259e-05	0.00131172	down	yes
Zm00001d006841	0.991052	5.56805	-2.49014	1.45643e-05	0.00112108	down	yes
Zm00001d042293	8.57114	50.3128	-2.55337	2.1116e-08	2.86282e-06	down	yes
Zm00001d005083	0.147906	0.889774	-2.58875	1.20974e-05	0.000939975	down	yes
Zm00001d023372	0.0835718	0.505261	-2.59594	0.000822832	0.0289927	down	yes
Zm00001d047329	0.431499	2.60974	-2.59648	8.6117e-08	1.08702e-05	down	yes
Zm00001d045203	0.919073	5.56767	-2.59882	0.00107454	0.0355787	down	yes
Zm00001d042683	1.63214	9.8954	-2.59999	0.000442467	0.0185223	down	yes
Zm00001d039634	0.260761	1.58725	-2.60573	0.00169423	0.0498807	down	yes
Zm00001d027557	4.45454	27.2606	-2.61347	2.65944e-11	6.79188e-09	down	yes
Zm00001d048709	13.6252	83.8662	-2.62181	9.94301e-06	0.000783666	down	yes
Zm00001d004486	0.103434	0.643531	-2.6373	0.000150904	0.00813673	down	yes
Zm00001d011782	0.0603782	0.376642	-2.64109	0.00111627	0.0366291	down	yes
Zm00001d005822	1.86901	11.7502	-2.65235	0.000332875	0.0149205	down	yes
Zm00001d006570	0.647747	4.13316	-2.67374	1.22017e-05	0.000945845	down	yes
Zm00001d043862	0.259317	1.65659	-2.67543	4.93509e-08	6.40104e-06	down	yes
Zm00001d017033	21.6988	139.221	-2.68169	0.000251416	0.0120042	down	yes
Zm00001d023803	0.998353	6.40605	-2.68181	0.000465868	0.0193544	down	yes
Zm00001d011157	0.122518	0.79182	-2.69218	0.000270991	0.0127549	down	yes
Zm00001d043650	7.81808	50.5504	-2.69284	3.88375e-06	0.000346616	down	yes
Zm00001d016085	0.277016	1.8095	-2.70755	8.35351e-06	0.000677849	down	yes
Zm00001d053394	19.6766	131.146	-2.73662	7.0786e-06	0.000584472	down	yes
Zm00001d018709	0.936073	6.25695	-2.74077	0.000760327	0.0275566	down	yes
Zm00001d028906	3.07049	20.5756	-2.74439	6.93217e-05	0.00414483	down	yes
Zm00001d004738	0.0920083	0.640431	-2.79921	0.000396723	0.0171074	down	yes
Zm00001d051389	0.0727403	0.513777	-2.82031	0.000552779	0.0219069	down	yes
Zm00001d011315	0.0624539	0.454838	-2.86449	0.000237407	0.011519	down	yes
Zm00001d032906	0.0559237	0.411576	-2.87963	0.00069991	0.0258504	down	yes
Zm00001d032969	1.05308	7.8775	-2.90313	0.000674824	0.0252611	down	yes
Zm00001d031398	0.187705	1.41007	-2.90922	0.000170698	0.00902669	down	yes
Zm00001d048949	1.41604	10.681	-2.91511	0.00140974	0.0435683	down	yes
Zm00001d042914	0.097723	0.765986	-2.97055	0.00136849	0.0426133	down	yes
Zm00001d033020	0.515488	4.07382	-2.98237	1.90338e-07	2.25564e-05	down	yes
Zm00001d045698	3.96695	32.2609	-3.02369	3.34479e-07	3.69779e-05	down	yes
Zm00001d025958	0.543683	4.45814	-3.0356	6.92261e-06	0.000575923	down	yes
ZeamMp134	1.54223	13.1647	-3.09358	1.72276e-09	3.0351e-07	down	yes
Zm00001d031257	4.03508	34.6893	-3.10382	0.000176286	0.00929241	down	yes
Zm00001d018734	1.00525	8.70608	-3.11447	0.000106261	0.00604623	down	yes
Zm00001d032608	6.48967	56.418	-3.11994	2.11853e-07	2.475e-05	down	yes
Zm00001d049418	0.61455	5.38505	-3.13136	0.00123193	0.0392893	down	yes
ZemaCp032	9.15588	83.1091	-3.18224	1.42095e-08	2.00615e-06	down	yes
Zm00001d032691	2.19702	20.2487	-3.20421	1.50566e-07	1.82368e-05	down	yes
Zm00001d051485	0.791031	7.33411	-3.21282	3.66295e-09	6.12569e-07	down	yes
Zm00001d032696	0.493895	4.60814	-3.22191	0.000274658	0.0128897	down	yes
Zm00001d016121	0.798449	7.45972	-3.22385	7.48918e-06	0.000613759	down	yes
Zm00001d026480	1.31585	12.401	-3.2364	0.000431253	0.0181679	down	yes
Zm00001d004689	39.4887	373.83	-3.24287	7.19685e-07	7.49837e-05	down	yes
Zm00001d021897	0.332354	3.29408	-3.30908	3.0035e-07	3.40036e-05	down	yes
Zm00001d049419	0.790018	7.89201	-3.32044	0.000254192	0.0121017	down	yes
Zm00001d040089	3.3809	36.357	-3.42675	0.000361408	0.0158787	down	yes
Zm00001d013610	0.395883	4.32952	-3.45106	0.000249026	0.0119594	down	yes
Zm00001d015224	2.25209	24.7421	-3.45763	2.15073e-06	0.000201868	down	yes
Zm00001d051083	0.050375	0.556269	-3.465	0.000320521	0.0146052	down	yes
ZemaCp085	0.076817	0.880102	-3.51817	3.71008e-05	0.00244457	down	yes
Zm00001d014914	2.04269	23.7973	-3.54226	0.000195043	0.00999327	down	yes
Zm00001d045817	0.140086	1.65178	-3.55964	0.000777349	0.027867	down	yes
Zm00001d038950	1.86357	21.9789	-3.55998	7.87111e-07	8.0786e-05	down	yes
Zm00001d017032	7.53086	91.9321	-3.60968	7.17107e-07	7.49837e-05	down	yes
Zm00001d011097	0.162155	2.10651	-3.69941	0.000220542	0.0109095	down	yes
Zm00001d009945	0.234735	3.17484	-3.75758	1.62982e-05	0.00122033	down	yes
Zm00001d032750	0.028573	0.432703	-3.92065	0.000111557	0.00629325	down	yes
Zm00001d025018	0.467656	7.59822	-4.02214	1.3542e-09	2.42468e-07	down	yes
Zm00001d043419	0.219263	3.68999	-4.07289	0.000183897	0.0096014	down	yes
Zm00001d015217	2.74633	48.3505	-4.13796	8.15025e-10	1.5611e-07	down	yes
Zm00001d015718	0.0731347	1.3849	-4.24308	0.00117552	0.0380055	down	yes
Zm00001d045254	0.0140967	0.299563	-4.40943	8.56207e-05	0.00501026	down	yes
Zm00001d025012	0.178647	3.98005	-4.4776	1.06651e-11	3.05531e-09	down	yes
Zm00001d004007	0.0245263	0.555991	-4.50266	0.00163001	0.0485539	down	yes
Zm00001d030121	0.0156897	0.361061	-4.52436	0.000335259	0.0149866	down	yes
Zm00001d016287	0.14934	3.95027	-4.72528	0.00013642	0.0074657	down	yes
Zm00001d002435	0.00994967	0.275607	-4.79182	0.00139421	0.0432506	down	yes
Zm00001d052468	0.0349841	1.01666	-4.86099	0.001704	0.0499351	down	yes
Zm00001d038729	0.0500573	1.62163	-5.01772	1.64405e-05	0.00122819	down	yes
Zm00001d031416	0.102776	3.79287	-5.20571	3.39777e-05	0.00227983	down	yes
Zm00001d015394	0.00801433	0.312376	-5.28456	0.000456743	0.0190233	down	yes
Zm00001d025059	0.340527	14.7417	-5.43599	9.23145e-08	1.14766e-05	down	yes
Zm00001d027978	0.0119577	0.643028	-5.74887	0.000772583	0.0278476	down	yes
Zm00001d032368	0.0167557	0.994824	-5.89172	7.45809e-05	0.00443514	down	yes
Zm00001d017629	0.0776777	11.5419	-7.21517	0.000391021	0.0169058	down	yes
Zm00001d023344	0	0.0805088	-9.653	0.000680427	0.0253869	down	yes
Zm00001d052463	0	0.133407	-10.3816	0.000619047	0.0237976	down	yes
Zm00001d048421	0	0.148573	-10.537	0.000256009	0.0121706	down	yes
Zm00001d044854	0	0.15204	-10.5702	0.000674272	0.0252611	down	yes
Zm00001d016900	0	0.239085	-11.2233	0.000501807	0.0204375	down	yes
Zm00001d049704	0	0.269984	-11.3987	8.29748e-06	0.000674964	down	yes
Zm00001d005890	0	0.27592	-11.43	6.95781e-06	0.000577393	down	yes
Zm00001d044580	0	0.320491	-11.6461	8.54172e-05	0.00500724	down	yes
Zm00001d027021	0.015326	50.5785	-11.6883	2.42489e-05	0.00169613	down	yes
Zm00001d014498	0	0.406743	-11.9899	4.23117e-06	0.000372717	down	yes
Zm00001d019549	0	0.422649	-12.0452	9.28081e-06	0.00074033	down	yes
Zm00001d024068	0	0.445007	-12.1196	0.00057258	0.0223503	down	yes
Zm00001d039432	0	0.452807	-12.1447	0.000766197	0.0276477	down	yes
Zm00001d006915	0	0.475589	-12.2155	0.00159732	0.0478397	down	yes
Zm00001d004754	0	0.477622	-12.2217	0.00068327	0.0254642	down	yes
Zm00001d025737	0	0.506037	-12.305	0.000315539	0.0144582	down	yes
Zm00001d042029	0	0.683953	-12.7397	0.000193882	0.0099648	down	yes
Zm00001d007047	0	0.76153	-12.8947	3.57446e-05	0.002379	down	yes
Zm00001d043084	0	0.777979	-12.9255	1.17789e-09	2.16792e-07	down	yes
Zm00001d024023	0	0.872877	-13.0916	9.79037e-06	0.000777214	down	yes
Zm00001d018648	0	0.960694	-13.2299	3.95885e-07	4.31869e-05	down	yes
Zm00001d003447	0	1.01647	-13.3113	7.22903e-05	0.0043145	down	yes
Zm00001d000825	0	1.05957	-13.3712	0.00146416	0.0447466	down	yes
Zm00001d037681	0	1.27819	-13.6418	5.06893e-12	1.54626e-09	down	yes
Zm00001d022320	0	1.60246	-13.968	7.21501e-07	7.49837e-05	down	yes
Zm00001d052786	0	2.77546	-14.7604	9.47506e-12	2.76244e-09	down	yes

## Sheet: UP
Supplementary Table S5 DEGs regulated leaf angle in B73 under ABA treatment group
gene_id	FPKM.WT_A	FPKM.WT_CK	log2(fc) (WT_A VS WT_CK)	pval (WT_A VS WT_CK)	qval (WT_A VS WT_CK)	regulation	significant
Zm00001d035390	26.5893	0	18.0205	1.51737e-11	4.13139e-09	up	yes
Zm00001d049263	14.9927	0	17.1939	1.04723e-17	7.1877e-15	up	yes
Zm00001d040952	14.7422	0	17.1696	1.51486e-29	4.15893e-26	up	yes
Zm00001d051745	12.9331	0	16.9807	1.40189e-19	1.35839e-16	up	yes
Zm00001d043260	12.4397	0	16.9246	5.24212e-16	2.69846e-13	up	yes
Zm00001d040326	12.4031	0	16.9203	5.85856e-23	9.05349e-20	up	yes
Zm00001d003118	11.0281	0	16.7508	6.04574e-23	9.05349e-20	up	yes
Zm00001d031037	10.5622	0	16.6885	0.00153875	0.0465083	up	yes
Zm00001d028839	10.0079	0	16.6108	1.67582e-16	9.35764e-14	up	yes
Zm00001d051713	8.82914	0	16.43	2.29047e-22	3.14415e-19	up	yes
Zm00001d007132	8.57959	0	16.3886	4.94044e-23	8.13814e-20	up	yes
Zm00001d009180	8.2771	0	16.3368	1.69538e-08	2.34138e-06	up	yes
Zm00001d050770	7.85799	0	16.2619	2.49791e-22	3.16514e-19	up	yes
Zm00001d010154	7.5598	0	16.2061	1.59006e-05	0.00119873	up	yes
Zm00001d028083	7.41672	0	16.1785	3.54024e-20	3.53434e-17	up	yes
Zm00001d038045	6.64288	0	16.0195	1.63652e-22	2.34414e-19	up	yes
Zm00001d035444	6.63678	0	16.0182	2.44042e-11	6.28123e-09	up	yes
Zm00001d039497	6.45755	0	15.9787	1.76391e-21	1.93707e-18	up	yes
Zm00001d003090	6.27303	0	15.9369	7.79298e-09	1.167e-06	up	yes
Zm00001d018546	6.08859	0	15.8938	1.04533e-15	4.99107e-13	up	yes
Zm00001d049250	5.81985	0	15.8287	3.8718e-21	3.98614e-18	up	yes
Zm00001d018955	5.76523	0	15.8151	8.79815e-10	1.66583e-07	up	yes
Zm00001d007026	5.61175	0	15.7762	1.49051e-21	1.69327e-18	up	yes
Zm00001d013713	5.52205	0	15.7529	2.42237e-22	3.16514e-19	up	yes
Zm00001d044714	5.19948	0	15.6661	8.27356e-08	1.04836e-05	up	yes
Zm00001d000677	5.14291	0	15.6503	5.3974e-12	1.60196e-09	up	yes
Zm00001d010510	5.10225	0	15.6388	3.15361e-21	3.35147e-18	up	yes
Zm00001d045718	5.01725	0	15.6146	2.40703e-18	1.80227e-15	up	yes
Zm00001d040852	4.92753	0	15.5886	7.84138e-19	6.45835e-16	up	yes
Zm00001d029893	4.92284	0	15.5872	4.24898e-07	4.60469e-05	up	yes
Zm00001d008773	4.82126	0	15.5571	1.28057e-23	2.3438e-20	up	yes
Zm00001d043750	4.78844	0	15.5473	5.30977e-19	4.60344e-16	up	yes
Zm00001d010739	4.70355	0	15.5215	1.47813e-13	5.2208e-11	up	yes
Zm00001d029316	4.67925	0	15.514	0.00159724	0.0478397	up	yes
Zm00001d038694	4.61982	0	15.4956	4.60252e-15	2.04906e-12	up	yes
Zm00001d040069	4.53747	0	15.4696	1.03093e-14	4.41091e-12	up	yes
Zm00001d001770	4.46601	0	15.4467	2.09259e-19	1.96972e-16	up	yes
Zm00001d035794	4.46454	0	15.4462	1.98561e-12	6.11364e-10	up	yes
Zm00001d044558	4.13701	0	15.3363	3.53653e-09	5.94444e-07	up	yes
Zm00001d016533	3.60633	0	15.1382	6.26805e-22	7.64818e-19	up	yes
Zm00001d018317	3.5518	0	15.1163	6.56221e-16	3.22675e-13	up	yes
Zm00001d001926	3.41237	0	15.0585	6.59916e-17	3.9529e-14	up	yes
Zm00001d040216	3.37782	0	15.0438	2.83884e-17	1.83383e-14	up	yes
Zm00001d012064	3.35065	0	15.0322	1.93669e-09	3.39079e-07	up	yes
Zm00001d032255	3.33788	0	15.0266	7.63341e-11	1.79631e-08	up	yes
Zm00001d035621	3.3149	0	15.0167	5.58728e-18	4.00158e-15	up	yes
Zm00001d030930	3.28781	0	15.0048	1.24886e-10	2.82564e-08	up	yes
Zm00001d044977	3.20331	0	14.9673	1.45394e-12	4.54664e-10	up	yes
Zm00001d015538	3.17005	0	14.9522	3.33696e-15	1.5142e-12	up	yes
Zm00001d005458	3.11331	0	14.9262	3.65793e-06	0.000328366	up	yes
Zm00001d010511	3.07688	0	14.9092	3.9543e-14	1.58871e-11	up	yes
Zm00001d016312	2.94296	0	14.845	0.000202614	0.0102133	up	yes
Zm00001d039288	2.91049	0	14.829	4.48721e-14	1.75989e-11	up	yes
Zm00001d014401	2.77993	0	14.7628	7.62601e-08	9.70034e-06	up	yes
Zm00001d040375	2.7276	0	14.7353	6.5357e-08	8.41089e-06	up	yes
Zm00001d007131	2.67256	0	14.7059	4.61404e-16	2.41285e-13	up	yes
Zm00001d036913	2.5992	0	14.6658	2.2357e-19	2.04597e-16	up	yes
Zm00001d021538	2.52506	0	14.624	1.55802e-10	3.3769e-08	up	yes
Zm00001d029805	2.46037	0	14.5866	0.000469997	0.0195013	up	yes
Zm00001d043379	2.45625	0	14.5842	1.53798e-09	2.73885e-07	up	yes
Zm00001d016235	2.4009	0	14.5513	9.73803e-12	2.81421e-09	up	yes
Zm00001d023993	2.34479	0	14.5172	6.52079e-13	2.14827e-10	up	yes
Zm00001d032879	2.27796	0	14.4755	1.16107e-12	3.71372e-10	up	yes
Zm00001d051919	2.26253	0	14.4657	6.38919e-09	9.80558e-07	up	yes
Zm00001d002208	2.20671	0	14.4296	2.37386e-18	1.80227e-15	up	yes
Zm00001d017828	2.15598	0	14.3961	2.41074e-10	5.05871e-08	up	yes
Zm00001d031733	2.13191	0	14.3799	2.39283e-14	9.73233e-12	up	yes
Zm00001d043341	2.10451	0	14.3612	3.55672e-17	2.25339e-14	up	yes
Zm00001d028434	2.07189	0	14.3387	1.42042e-10	3.16188e-08	up	yes
Zm00001d030899	2.04586	0	14.3204	0.000337024	0.0150114	up	yes
Zm00001d011294	2.03065	0	14.3097	3.65761e-17	2.27359e-14	up	yes
Zm00001d034216	2.03044	0	14.3095	2.10616e-11	5.50695e-09	up	yes
Zm00001d042752	2.02768	0	14.3075	9.57951e-13	3.09409e-10	up	yes
Zm00001d002110	1.98321	0	14.2755	3.93345e-13	1.32232e-10	up	yes
Zm00001d018152	1.97224	0	14.2675	5.18205e-10	1.01621e-07	up	yes
Zm00001d017254	1.96967	0	14.2657	5.34621e-14	2.04804e-11	up	yes
Zm00001d038017	1.94216	0	14.2454	7.93752e-09	1.18327e-06	up	yes
Zm00001d019794	1.90387	0	14.2166	3.53684e-10	7.19266e-08	up	yes
Zm00001d004869	1.87005	0	14.1908	4.24248e-11	1.05089e-08	up	yes
Zm00001d029592	1.86021	0	14.1832	1.00484e-08	1.4648e-06	up	yes
Zm00001d019792	1.81487	0	14.1476	0.000429758	0.0181285	up	yes
Zm00001d051342	1.77517	0	14.1157	4.50542e-05	0.00287657	up	yes
Zm00001d029743	1.77447	0	14.1151	5.12087e-14	1.98479e-11	up	yes
Zm00001d033017	1.76955	0	14.1111	4.47443e-11	1.09434e-08	up	yes
Zm00001d048123	1.75724	0	14.101	2.01117e-11	5.30063e-09	up	yes
Zm00001d033115	1.70196	0	14.0549	2.32099e-07	2.69244e-05	up	yes
Zm00001d014523	1.69625	0	14.0501	3.14566e-13	1.07952e-10	up	yes
Zm00001d035209	1.64755	0	14.008	6.14492e-19	5.19088e-16	up	yes
Zm00001d004475	1.64648	0	14.0071	8.50202e-07	8.64503e-05	up	yes
Zm00001d019793	1.61997	0	13.9837	2.20045e-11	5.70818e-09	up	yes
Zm00001d024029	1.59647	0	13.9626	4.37215e-10	8.72756e-08	up	yes
Zm00001d019705	1.59025	0	13.957	0.000324329	0.0147177	up	yes
Zm00001d030399	1.58822	0	13.9551	1.45484e-11	3.99413e-09	up	yes
Zm00001d015278	1.58715	0	13.9542	1.79214e-14	7.5695e-12	up	yes
Zm00001d031559	1.58453	0	13.9518	0.000245051	0.0118029	up	yes
Zm00001d039831	1.57092	0	13.9393	2.38076e-09	4.1065e-07	up	yes
Zm00001d035316	1.56866	0	13.9372	6.3291e-17	3.86134e-14	up	yes
Zm00001d035413	1.54963	0	13.9196	8.40626e-10	1.60083e-07	up	yes
Zm00001d046520	1.53832	0	13.9091	3.49373e-06	0.000315345	up	yes
Zm00001d046181	1.53067	0	13.9019	2.28342e-09	3.95934e-07	up	yes
Zm00001d046849	1.50284	0	13.8754	5.57497e-11	1.33092e-08	up	yes
Zm00001d006229	1.49918	0	13.8719	0.000368477	0.0161644	up	yes
Zm00001d017831	1.48563	0	13.8588	5.74542e-16	2.86792e-13	up	yes
Zm00001d015481	1.45537	0	13.8291	5.23086e-09	8.32515e-07	up	yes
Zm00001d018189	1.41382	0	13.7873	1.45607e-16	8.27071e-14	up	yes
Zm00001d013718	1.38545	0	13.7581	5.39466e-16	2.73426e-13	up	yes
Zm00001d019176	1.37719	0	13.7494	3.35519e-15	1.5142e-12	up	yes
Zm00001d047323	1.3687	0	13.7405	4.93886e-09	7.89857e-07	up	yes
Zm00001d035703	1.36681	0	13.7385	3.35649e-13	1.13999e-10	up	yes
Zm00001d002506	1.31835	0	13.6864	0.000318951	0.014574	up	yes
Zm00001d050281	1.31342	0	13.681	0.000350383	0.015453	up	yes
Zm00001d015055	1.28585	0	13.6504	1.94524e-09	3.39079e-07	up	yes
Zm00001d003638	1.27406	0	13.6372	2.08288e-08	2.83556e-06	up	yes
Zm00001d031482	1.2551	0	13.6155	6.64455e-10	1.28015e-07	up	yes
Zm00001d011546	1.22635	0	13.5821	3.88257e-16	2.0969e-13	up	yes
Zm00001d025318	1.22386	0	13.5791	0.000203905	0.0102403	up	yes
Zm00001d036871	1.22052	0	13.5752	4.52248e-09	7.32269e-07	up	yes
Zm00001d035222	1.21571	0	13.5695	4.51508e-11	1.09434e-08	up	yes
Zm00001d035819	1.1566	0	13.4976	1.41123e-10	3.16188e-08	up	yes
Zm00001d008083	1.14404	0	13.4818	5.22679e-07	5.5908e-05	up	yes
Zm00001d040325	1.13784	0	13.474	4.41496e-16	2.34598e-13	up	yes
Zm00001d017506	1.13481	0	13.4702	6.27129e-05	0.00384029	up	yes
Zm00001d003747	1.12619	0	13.4592	0.000476869	0.0196626	up	yes
Zm00001d042655	1.11684	0	13.4471	0.000638725	0.0243747	up	yes
Zm00001d007367	1.11286	0	13.442	1.05085e-08	1.52512e-06	up	yes
Zm00001d013771	1.10592	0	13.433	1.65238e-10	3.55801e-08	up	yes
Zm00001d003988	1.10503	0	13.4318	3.31661e-07	3.67898e-05	up	yes
Zm00001d015482	1.0988	0	13.4236	1.9664e-06	0.000185625	up	yes
Zm00001d039839	1.08245	0	13.402	0.000501442	0.0204375	up	yes
Zm00001d038564	1.07203	0	13.3881	2.3017e-06	0.000214208	up	yes
Zm00001d032064	1.05296	0	13.3622	6.16436e-14	2.33431e-11	up	yes
Zm00001d033289	1.05134	0	13.3599	0.00132762	0.0415764	up	yes
Zm00001d040187	1.02787	0	13.3274	0.000204935	0.0102608	up	yes
Zm00001d005599	1.02277	0	13.3202	4.72347e-15	2.07486e-12	up	yes
Zm00001d035244	1.01589	0	13.3105	1.90091e-07	2.25564e-05	up	yes
Zm00001d021509	1.0156	0	13.31	3.86208e-09	6.39379e-07	up	yes
Zm00001d030198	0.962842	0	13.2331	1.56549e-07	1.8892e-05	up	yes
Zm00001d053305	0.961539	0	13.2311	1.25414e-11	3.5015e-09	up	yes
Zm00001d021462	0.957563	0	13.2252	0.000821413	0.0289737	up	yes
Zm00001d005337	0.94175	0	13.2011	3.42673e-11	8.55254e-09	up	yes
Zm00001d047493	0.939808	0	13.1981	0.00151681	0.0460533	up	yes
Zm00001d015555	0.938331	0	13.1959	0.000241452	0.011674	up	yes
Zm00001d046475	0.912748	0	13.156	2.7931e-08	3.74847e-06	up	yes
Zm00001d009843	0.912189	0	13.1551	1.50785e-08	2.11388e-06	up	yes
Zm00001d002207	0.909478	0	13.1508	4.46707e-06	0.000390365	up	yes
Zm00001d025265	0.90932	0	13.1506	0.00162132	0.0483826	up	yes
Zm00001d040590	0.904673	0	13.1432	0.000586896	0.0227742	up	yes
Zm00001d052589	0.904502	0	13.1429	9.84435e-17	5.79146e-14	up	yes
Zm00001d009070	0.894493	0	13.1269	0.00106059	0.0352583	up	yes
Zm00001d051008	0.89174	0	13.1224	1.00906e-13	3.69373e-11	up	yes
Zm00001d009790	0.885651	0	13.1125	5.8127e-06	0.000496112	up	yes
Zm00001d012262	0.880028	0	13.1033	8.26489e-14	3.0594e-11	up	yes
Zm00001d021431	0.878649	0	13.1011	4.53492e-05	0.0028898	up	yes
Zm00001d039888	0.876926	0	13.0982	0.000906598	0.0311773	up	yes
Zm00001d052648	0.860753	0	13.0714	2.10191e-10	4.46757e-08	up	yes
Zm00001d010258	0.860328	0	13.0707	1.2452e-10	2.82564e-08	up	yes
Zm00001d003210	0.853516	0	13.0592	0.00048457	0.0198859	up	yes
Zm00001d035245	0.850832	0	13.0547	3.21847e-07	3.59432e-05	up	yes
Zm00001d029575	0.847847	0	13.0496	0.00101425	0.0339925	up	yes
Zm00001d034326	0.843344	0	13.0419	2.33946e-10	4.94061e-08	up	yes
Zm00001d015219	0.83781	0	13.0324	1.88362e-11	5.00449e-09	up	yes
Zm00001d030216	0.814676	0	12.992	1.37685e-11	3.81178e-09	up	yes
Zm00001d052014	0.814311	0	12.9914	2.40463e-05	0.00168913	up	yes
Zm00001d035636	0.813253	0	12.9895	0.000566724	0.0221743	up	yes
Zm00001d011137	0.799771	0	12.9654	7.10049e-08	9.06689e-06	up	yes
Zm00001d024652	0.797246	0	12.9608	0.000439776	0.0184566	up	yes
Zm00001d049912	0.789443	0	12.9466	4.68252e-13	1.55824e-10	up	yes
Zm00001d047158	0.782019	0	12.933	1.33206e-07	1.61936e-05	up	yes
Zm00001d009642	0.781018	0	12.9311	0.000840445	0.029331	up	yes
Zm00001d053619	0.770477	0	12.9115	1.50957e-10	3.29357e-08	up	yes
Zm00001d038992	0.769626	0	12.9099	8.25118e-14	3.0594e-11	up	yes
Zm00001d041103	0.760094	0	12.892	0.000713446	0.026262	up	yes
Zm00001d017058	0.757515	0	12.8871	4.53431e-09	7.32269e-07	up	yes
Zm00001d015419	0.753098	0	12.8786	1.07994e-09	2.0101e-07	up	yes
Zm00001d037921	0.751909	0	12.8763	1.56013e-08	2.1779e-06	up	yes
Zm00001d030261	0.747488	0	12.8678	6.74584e-06	0.000563943	up	yes
Zm00001d043756	0.74319	0	12.8595	1.09937e-08	1.5816e-06	up	yes
Zm00001d011869	0.73803	0	12.8495	1.69758e-11	4.58417e-09	up	yes
Zm00001d040289	0.736258	0	12.846	0.00134289	0.041935	up	yes
Zm00001d033260	0.730102	0	12.8339	0.00112059	0.0366978	up	yes
Zm00001d021801	0.727912	0	12.8295	3.20927e-05	0.0021755	up	yes
Zm00001d013111	0.722371	0	12.8185	1.15103e-08	1.64872e-06	up	yes
Zm00001d004510	0.721951	0	12.8177	2.90437e-10	5.98027e-08	up	yes
Zm00001d009423	0.70784	0	12.7892	0.000187182	0.00972665	up	yes
Zm00001d043793	0.707806	0	12.7891	0.000614749	0.0236599	up	yes
Zm00001d049033	0.703763	0	12.7809	2.68899e-06	0.000246765	up	yes
Zm00001d030270	0.672918	0	12.7162	1.31241e-13	4.75136e-11	up	yes
Zm00001d007245	0.67054	0	12.7111	0.000645722	0.0245034	up	yes
Zm00001d042594	0.661676	0	12.6919	0.00117803	0.0380491	up	yes
Zm00001d045132	0.650857	0	12.6681	0.00169926	0.0499077	up	yes
Zm00001d019805	0.649817	0	12.6658	3.93528e-08	5.14475e-06	up	yes
Zm00001d039815	0.648365	0	12.6626	1.98813e-07	2.33344e-05	up	yes
Zm00001d026795	0.639185	0	12.642	0.000684521	0.025482	up	yes
Zm00001d037893	0.637176	0	12.6375	0.00019353	0.0099648	up	yes
Zm00001d026818	0.63204	0	12.6258	0.000418347	0.0177838	up	yes
Zm00001d033384	0.631762	0	12.6252	6.16252e-06	0.000520575	up	yes
Zm00001d040266	0.623246	0	12.6056	2.58373e-09	4.41042e-07	up	yes
Zm00001d023924	0.621904	0	12.6025	7.83455e-05	0.00463392	up	yes
Zm00001d039388	0.618514	0	12.5946	0.000993273	0.0333989	up	yes
Zm00001d029693	0.610436	0	12.5756	2.46863e-05	0.00172307	up	yes
Zm00001d017245	0.610167	0	12.575	1.10025e-10	2.5348e-08	up	yes
Zm00001d037395	0.609912	0	12.5744	4.39756e-10	8.72756e-08	up	yes
Zm00001d012357	0.609345	0	12.573	9.27567e-10	1.74347e-07	up	yes
Zm00001d053366	0.589462	0	12.5252	5.47371e-09	8.58721e-07	up	yes
Zm00001d039554	0.588035	0	12.5217	0.000640399	0.0243907	up	yes
Zm00001d021660	0.575984	0	12.4918	1.95445e-16	1.07316e-13	up	yes
Zm00001d036341	0.574395	0	12.4878	0.00054602	0.021778	up	yes
Zm00001d043079	0.573864	0	12.4865	1.1621e-07	1.42325e-05	up	yes
Zm00001d014309	0.5737	0	12.4861	0.000635631	0.0243216	up	yes
Zm00001d052529	0.566338	0	12.4674	0.000165687	0.00886127	up	yes
Zm00001d039757	0.564339	0	12.4623	1.00055e-10	2.33781e-08	up	yes
Zm00001d035570	0.564058	0	12.4616	2.67391e-17	1.76184e-14	up	yes
Zm00001d027932	0.55977	0	12.4506	3.28783e-05	0.00222418	up	yes
Zm00001d050937	0.557736	0	12.4454	1.26128e-09	2.27064e-07	up	yes
Zm00001d025074	0.552429	0	12.4316	4.06742e-07	4.42248e-05	up	yes
Zm00001d004519	0.551608	0	12.4294	2.48879e-05	0.00173347	up	yes
Zm00001d024164	0.546575	0	12.4162	0.000126317	0.00697068	up	yes
Zm00001d032877	0.544098	0	12.4097	1.50161e-10	3.29357e-08	up	yes
Zm00001d025806	0.54109	0	12.4017	5.26188e-09	8.33427e-07	up	yes
Zm00001d014051	0.53452	0	12.384	0.000329831	0.0148244	up	yes
Zm00001d015533	0.521042	0	12.3472	0.000361483	0.0158787	up	yes
Zm00001d049792	0.520955	0	12.3469	1.31278e-08	1.86421e-06	up	yes
Zm00001d013894	0.507612	0	12.3095	1.32754e-12	4.20537e-10	up	yes
Zm00001d014053	0.503139	0	12.2967	1.94096e-05	0.00140848	up	yes
Zm00001d025371	0.490951	0	12.2614	0.000670405	0.0251841	up	yes
Zm00001d021984	0.480711	0	12.231	0.000863623	0.0298553	up	yes
Zm00001d014216	0.480545	0	12.2305	4.09511e-10	8.22643e-08	up	yes
Zm00001d017485	0.476374	0	12.2179	1.08682e-08	1.5704e-06	up	yes
Zm00001d017896	0.473933	0	12.2105	3.48941e-08	4.58002e-06	up	yes
Zm00001d044383	0.470382	0	12.1996	0.000940291	0.0321014	up	yes
Zm00001d029237	0.466652	0	12.1881	2.26861e-15	1.05267e-12	up	yes
Zm00001d027603	0.46135	0	12.1716	6.13806e-10	1.18952e-07	up	yes
Zm00001d040141	0.453755	0	12.1477	6.01733e-09	9.30708e-07	up	yes
Zm00001d002133	0.448064	0	12.1295	6.702e-05	0.00405133	up	yes
Zm00001d009767	0.43947	0	12.1016	2.1769e-06	0.000203744	up	yes
Zm00001d016657	0.438981	0	12.0999	1.42491e-08	2.00615e-06	up	yes
Zm00001d003733	0.43608	0	12.0904	6.58293e-05	0.00400138	up	yes
Zm00001d005449	0.43222	0	12.0776	7.93194e-06	0.000646826	up	yes
Zm00001d011414	0.432015	0	12.0769	0.000916797	0.0314421	up	yes
Zm00001d047339	0.431643	0	12.0756	6.75679e-09	1.02111e-06	up	yes
Zm00001d007708	0.430992	0	12.0734	1.09096e-09	2.0192e-07	up	yes
Zm00001d050866	0.430913	0	12.0732	8.77827e-05	0.00510954	up	yes
Zm00001d054073	0.4305	0	12.0718	2.09301e-14	8.61928e-12	up	yes
Zm00001d052554	0.426562	0	12.0585	0.000289565	0.0134654	up	yes
Zm00001d015606	0.425403	0	12.0546	0.000855008	0.0296508	up	yes
Zm00001d038550	0.42242	0	12.0445	2.15686e-07	2.51087e-05	up	yes
Zm00001d030726	0.40949	0	11.9996	0.00170121	0.0499077	up	yes
Zm00001d004950	0.407327	0	11.992	2.52281e-07	2.8859e-05	up	yes
Zm00001d002220	0.406786	0	11.9901	0.000644921	0.0245034	up	yes
Zm00001d049017	0.405597	0	11.9858	1.18811e-09	2.17456e-07	up	yes
Zm00001d002227	0.400603	0	11.968	0.00072343	0.0265701	up	yes
Zm00001d049793	0.398972	0	11.9621	0.00123614	0.0393475	up	yes
Zm00001d044703	0.392519	0	11.9385	1.50668e-10	3.29357e-08	up	yes
Zm00001d007672	0.392385	0	11.9381	1.25222e-10	2.82564e-08	up	yes
Zm00001d016842	0.388902	0	11.9252	3.43237e-08	4.54717e-06	up	yes
Zm00001d002710	0.38507	0	11.9109	0.0010622	0.0352763	up	yes
Zm00001d039814	0.382145	0	11.8999	7.25323e-12	2.13355e-09	up	yes
Zm00001d037876	0.379895	0	11.8914	1.37482e-06	0.000132859	up	yes
Zm00001d003753	0.375506	0	11.8746	5.34785e-05	0.00333684	up	yes
Zm00001d029152	0.3736	0	11.8673	3.43678e-08	4.54717e-06	up	yes
Zm00001d004907	0.370297	0	11.8545	0.00020107	0.0101755	up	yes
Zm00001d013733	0.369623	0	11.8518	3.20925e-07	3.59432e-05	up	yes
Zm00001d004066	0.366693	0	11.8404	0.0010034	0.0336628	up	yes
Zm00001d046128	0.365395	0	11.8352	0.000167531	0.00893093	up	yes
Zm00001d023105	0.355465	0	11.7955	0.000283688	0.0132381	up	yes
Zm00001d044634	0.353325	0	11.7868	0.000349564	0.0154375	up	yes
Zm00001d046294	0.351776	0	11.7804	0.000230688	0.0113469	up	yes
Zm00001d051483	0.346239	0	11.7576	0.000117216	0.00653414	up	yes
Zm00001d049771	0.342763	0	11.743	1.23091e-11	3.49588e-09	up	yes
Zm00001d032827	0.340056	0	11.7316	1.02898e-05	0.000805219	up	yes
Zm00001d033360	0.339909	0	11.7309	0.000895948	0.0308433	up	yes
Zm00001d024475	0.336085	0	11.7146	2.54564e-09	4.36802e-07	up	yes
Zm00001d029606	0.334256	0	11.7067	0.00112496	0.0367313	up	yes
Zm00001d050607	0.333506	0	11.7035	0.000888851	0.030631	up	yes
Zm00001d050568	0.332788	0	11.7004	0.000811462	0.028715	up	yes
Zm00001d028525	0.328746	0	11.6828	1.54648e-13	5.36302e-11	up	yes
Zm00001d041650	0.316761	0	11.6292	0.00140928	0.0435683	up	yes
Zm00001d036342	0.314315	0	11.618	8.86416e-05	0.00515044	up	yes
Zm00001d053142	0.310061	0	11.5983	1.78233e-08	2.44662e-06	up	yes
Zm00001d030815	0.30392	0	11.5695	7.87139e-07	8.0786e-05	up	yes
Zm00001d036898	0.301423	0	11.5576	0.000337182	0.0150114	up	yes
Zm00001d051776	0.301371	0	11.5573	0.000313744	0.014396	up	yes
Zm00001d041733	0.297435	0	11.5384	0.000169081	0.00896999	up	yes
Zm00001d023982	0.297117	0	11.5368	1.53559e-05	0.00116836	up	yes
Zm00001d014393	0.290791	0	11.5058	0.000142078	0.00771873	up	yes
Zm00001d004356	0.282941	0	11.4663	0.000122811	0.00680004	up	yes
Zm00001d019999	0.278898	0	11.4455	0.000318806	0.014574	up	yes
Zm00001d047546	0.277374	0	11.4376	0.000117047	0.00653414	up	yes
Zm00001d019803	0.276544	0	11.4333	9.85399e-05	0.00567552	up	yes
Zm00001d014263	0.266569	0	11.3803	6.70117e-09	1.02068e-06	up	yes
Zm00001d044855	0.26327	0	11.3623	0.000808825	0.0286524	up	yes
Zm00001d042631	0.262757	0	11.3595	8.3446e-05	0.00490476	up	yes
Zm00001d042677	0.262747	0	11.3595	0.00108023	0.0356953	up	yes
Zm00001d028855	0.260052	0	11.3446	2.46244e-06	0.000228522	up	yes
Zm00001d009342	0.258664	0	11.3369	6.84746e-05	0.00410163	up	yes
Zm00001d005840	0.255696	0	11.3202	4.70862e-11	1.1323e-08	up	yes
Zm00001d025248	0.255655	0	11.32	2.93442e-06	0.00026854	up	yes
Zm00001d007365	0.254841	0	11.3154	4.56894e-09	7.34262e-07	up	yes
Zm00001d023351	0.254839	0	11.3154	6.01733e-09	9.30708e-07	up	yes
Zm00001d051625	0.253705	0	11.3089	6.98224e-06	0.000577965	up	yes
Zm00001d032150	0.247882	0	11.2754	0.00032775	0.0147712	up	yes
Zm00001d041498	0.245221	0	11.2599	1.16038e-06	0.000114801	up	yes
Zm00001d014460	0.242292	0	11.2425	9.29766e-08	1.15155e-05	up	yes
Zm00001d029581	0.241183	0	11.2359	0.000401117	0.0171844	up	yes
Zm00001d002043	0.238985	0	11.2227	1.80253e-05	0.00132554	up	yes
Zm00001d009311	0.235252	0	11.2	0.000743032	0.0270488	up	yes
Zm00001d008615	0.234078	0	11.1928	1.49111e-05	0.00114243	up	yes
Zm00001d035391	0.232896	0	11.1855	1.07048e-06	0.00010687	up	yes
Zm00001d038958	0.221054	0	11.1102	4.15753e-05	0.00270157	up	yes
Zm00001d044337	0.220277	0	11.1051	0.000491115	0.0200991	up	yes
Zm00001d025733	0.215644	0	11.0744	0.0011281	0.0367972	up	yes
Zm00001d023601	0.215008	0	11.0702	5.55286e-05	0.00345168	up	yes
Zm00001d013968	0.213794	0	11.062	6.78266e-05	0.00407764	up	yes
Zm00001d004230	0.21327	0	11.0585	4.80875e-15	2.08453e-12	up	yes
Zm00001d004727	0.210773	0	11.0415	0.00163641	0.0486567	up	yes
Zm00001d015074	0.206691	0	11.0133	0.000251213	0.0120042	up	yes
Zm00001d008382	0.185027	0	10.8535	0.000953538	0.0324217	up	yes
Zm00001d003474	0.181178	0	10.8232	2.35622e-05	0.00166222	up	yes
Zm00001d044863	0.181012	0	10.8219	0.000234077	0.0113752	up	yes
Zm00001d025081	0.174168	0	10.7663	0.00123484	0.039344	up	yes
Zm00001d019862	0.172337	0	10.751	0.000137404	0.00749701	up	yes
Zm00001d038876	0.165205	0	10.69	0.000445711	0.0186344	up	yes
Zm00001d025343	0.165199	0	10.69	0.000377119	0.0164996	up	yes
Zm00001d041915	0.159884	0	10.6428	9.57489e-09	1.40824e-06	up	yes
Zm00001d043021	0.15873	0	10.6324	0.000267537	0.0126456	up	yes
Zm00001d009641	0.158443	0	10.6297	0.000592942	0.0229278	up	yes
Zm00001d012221	0.158442	0	10.6297	0.000319799	0.0145925	up	yes
Zm00001d024629	0.155822	0	10.6057	0.000165687	0.00886127	up	yes
Zm00001d045455	0.155086	0	10.5989	0.00120149	0.0386553	up	yes
Zm00001d003967	0.154736	0	10.5956	0.00037891	0.016556	up	yes
Zm00001d011244	0.153421	0	10.5833	0.000152316	0.00819941	up	yes
Zm00001d005617	0.150156	0	10.5522	0.000414397	0.0176843	up	yes
Zm00001d003666	0.147328	0	10.5248	0.00108921	0.0359559	up	yes
Zm00001d002863	2.98759	0.00203233	10.5216	1.48962e-13	5.2208e-11	up	yes
Zm00001d006522	0.146425	0	10.5159	3.45516e-10	7.0702e-08	up	yes
Zm00001d036129	10.7843	0.007465	10.4965	8.1149e-31	2.43041e-27	up	yes
Zm00001d032985	0.141568	0	10.4673	1.18703e-08	1.69294e-06	up	yes
Zm00001d047714	0.136792	0	10.4178	0.00011402	0.00642119	up	yes
Zm00001d016015	0.135491	0	10.404	0.000200208	0.0101474	up	yes
Zm00001d036643	0.134138	0	10.3895	0.00156894	0.0471611	up	yes
Zm00001d026063	0.133114	0	10.3784	0.00170517	0.0499351	up	yes
Zm00001d052793	0.131414	0	10.3599	1.69856e-08	2.34138e-06	up	yes
Zm00001d033355	0.128983	0	10.333	0.000479117	0.0197306	up	yes
Zm00001d043617	0.126958	0	10.3101	0.00165777	0.0489432	up	yes
Zm00001d009851	0.125413	0	10.2925	0.000614351	0.0236599	up	yes
Zm00001d007064	0.125177	0	10.2897	0.000400212	0.0171844	up	yes
Zm00001d042651	0.120365	0	10.2332	3.89279e-06	0.000346616	up	yes
Zm00001d029353	0.118866	0	10.2151	0.000961045	0.0326408	up	yes
Zm00001d045377	0.11839	0	10.2093	0.000104855	0.00597654	up	yes
Zm00001d017713	0.116144	0	10.1817	0.000334793	0.0149861	up	yes
Zm00001d028627	0.112344	0	10.1337	6.01444e-07	6.37124e-05	up	yes
Zm00001d028621	0.104648	0	10.0313	5.14665e-07	5.53017e-05	up	yes
Zm00001d040413	0.103311	0	10.0128	7.60132e-07	7.85032e-05	up	yes
Zm00001d017427	0.102151	0	9.99649	0.000763053	0.0275655	up	yes
Zm00001d035143	0.0981137	0	9.93831	0.000744803	0.0270704	up	yes
Zm00001d015046	0.0969776	0	9.92151	0.001152	0.0373555	up	yes
Zm00001d017724	0.0921823	0	9.84835	0.000780034	0.0279328	up	yes
Zm00001d007637	0.088045	0	9.7821	3.10297e-07	3.50094e-05	up	yes
Zm00001d016122	0.0843885	0	9.7209	4.44354e-05	0.0028481	up	yes
Zm00001d035370	0.0824154	0	9.68677	2.41476e-05	0.00169264	up	yes
Zm00001d003578	0.0675387	0	9.39957	4.46257e-05	0.00285475	up	yes
Zm00001d015986	8.38216	0.0145	9.17512	1.28121e-39	8.44187e-36	up	yes
Zm00001d023657	52.2258	0.0908967	9.16632	2.55129e-35	9.33912e-32	up	yes
Zm00001d050313	0.0530624	0	9.05155	0.000846359	0.0294438	up	yes
Zm00001d052383	1.83947	0.003545	9.01929	9.31404e-10	1.74347e-07	up	yes
Zm00001d013618	0.0501091	0	8.96893	0.00120589	0.0386814	up	yes
Zm00001d042021	0.876815	0.00221533	8.6286	1.59732e-07	1.92057e-05	up	yes
Zm00001d042692	7.41537	0.0192661	8.58831	1.0717e-10	2.48641e-08	up	yes
Zm00001d014207	5.09759	0.0138184	8.52708	2.50956e-38	1.37796e-34	up	yes
Zm00001d047778	14.7197	0.0463628	8.31057	8.42469e-22	9.91256e-19	up	yes
Zm00001d046121	3.4594	0.0116397	8.21533	5.84536e-18	4.09735e-15	up	yes
Zm00001d002917	21.3884	0.0748017	8.15954	1.07452e-46	1.18001e-42	up	yes
Zm00001d024053	3.8583	0.0135173	8.15702	2.20224e-05	0.0015686	up	yes
Zm00001d044237	2.16044	0.007592	8.15263	0.00160571	0.0480036	up	yes
Zm00001d035710	81.1213	0.29991	8.07941	6.77014e-05	0.00407755	up	yes
Zm00001d030821	10.0913	0.0391053	8.01154	0.00122256	0.0391281	up	yes
Zm00001d007166	0.721131	0.00280867	8.00423	0.000234098	0.0113752	up	yes
Zm00001d007084	18.9016	0.080175	7.88114	0.000168614	0.00895966	up	yes
Zm00001d010093	22.574	0.095777	7.88077	9.21142e-08	1.14766e-05	up	yes
Zm00001d040679	4.93438	0.0213527	7.85231	6.89114e-09	1.03666e-06	up	yes
Zm00001d030183	1.68935	0.00756767	7.8024	1.63715e-18	1.31551e-15	up	yes
Zm00001d041746	7.52487	0.0372587	7.65795	1.13356e-16	6.55176e-14	up	yes
Zm00001d016556	0.404677	0.00203233	7.63749	3.3938e-05	0.00227983	up	yes
Zm00001d049673	5.65396	0.028804	7.61685	3.69687e-19	3.29171e-16	up	yes
Zm00001d009215	0.855618	0.00489767	7.44873	5.746e-06	0.000491693	up	yes
Zm00001d005147	1.41449	0.00810333	7.44755	3.4249e-06	0.000309982	up	yes
Zm00001d046043	2.16714	0.013179	7.3614	2.35955e-07	2.71802e-05	up	yes
Zm00001d003693	0.361885	0.002255	7.32626	3.14063e-07	3.53133e-05	up	yes
Zm00001d046117	2.39795	0.016352	7.19619	5.09169e-06	0.000440277	up	yes
Zm00001d024014	12.0071	0.0821677	7.1911	0.000550795	0.0218626	up	yes
Zm00001d040209	2.42066	0.0171273	7.14296	1.24214e-11	3.49763e-09	up	yes
Zm00001d016919	1.26932	0.00923767	7.10232	5.2548e-12	1.57381e-09	up	yes
Zm00001d034411	1.1802	0.008873	7.0554	4.34538e-05	0.00280703	up	yes
Zm00001d019632	2.63563	0.0198237	7.05478	6.60663e-13	2.155e-10	up	yes
Zm00001d052727	0.694271	0.00540151	7.00599	9.70728e-09	1.42136e-06	up	yes
Zm00001d046044	6.04238	0.049037	6.9451	4.51755e-11	1.09434e-08	up	yes
Zm00001d044450	2.16095	0.01821	6.89079	0.000859799	0.0297543	up	yes
Zm00001d014256	0.435069	0.003885	6.80719	4.57492e-06	0.000398732	up	yes
Zm00001d009326	0.340757	0.00308425	6.78768	8.69849e-05	0.005076	up	yes
Zm00001d021247	0.431732	0.00393168	6.77885	6.5035e-06	0.000547974	up	yes
Zm00001d007427	4.0012	0.038994	6.68103	6.49858e-61	2.14096e-56	up	yes
Zm00001d012786	8.6698	0.10433	6.37677	4.93806e-18	3.61521e-15	up	yes
Zm00001d025872	1.43976	0.0191	6.23611	0.000297142	0.0137684	up	yes
Zm00001d032729	1.8608	0.02472	6.2341	1.22484e-09	2.22941e-07	up	yes
Zm00001d021814	2.76124	0.0367183	6.23267	4.41025e-09	7.19286e-07	up	yes
Zm00001d025279	1.38149	0.0186277	6.21263	9.18199e-09	1.3565e-06	up	yes
Zm00001d001321	2.99463	0.043069	6.11958	0.00027101	0.0127549	up	yes
Zm00001d028077	7.36411	0.117507	5.9697	1.4927e-17	1.00361e-14	up	yes
Zm00001d035180	0.457647	0.00738443	5.95361	0.000200086	0.0101474	up	yes
Zm00001d045670	0.134267	0.00224833	5.90011	0.000747526	0.0271225	up	yes
Zm00001d003186	1.54808	0.026891	5.84722	1.96642e-07	2.32199e-05	up	yes
Zm00001d045876	2.68738	0.0490564	5.77562	3.62149e-27	9.17768e-24	up	yes
Zm00001d040115	1.09566	0.0203193	5.75281	0.00051368	0.0208157	up	yes
Zm00001d032916	1.46761	0.0274097	5.74264	2.20058e-06	0.000205377	up	yes
Zm00001d031344	1.59339	0.0313373	5.66808	0.000183318	0.00958634	up	yes
Zm00001d018780	0.149679	0.003034	5.6245	0.000926753	0.0317379	up	yes
Zm00001d017893	0.955876	0.019396	5.62299	0.000142449	0.00771873	up	yes
Zm00001d010094	3.91892	0.0810157	5.59611	2.0862e-05	0.00149738	up	yes
Zm00001d043215	0.343021	0.00726833	5.56053	0.000874858	0.0302119	up	yes
Zm00001d020997	0.82586	0.0175327	5.55778	4.19528e-06	0.000371542	up	yes
Zm00001d023656	15.4021	0.327854	5.55393	1.81449e-25	3.73615e-22	up	yes
Zm00001d044983	1.77656	0.0389993	5.50949	1.01586e-05	0.000796846	up	yes
Zm00001d008577	1.54222	0.0347377	5.47236	0.000409348	0.0174915	up	yes
Zm00001d009512	1.27899	0.0289462	5.46548	1.28486e-35	6.04709e-32	up	yes
Zm00001d010554	10.8782	0.249689	5.44517	2.05513e-25	3.98273e-22	up	yes
Zm00001d030101	0.415263	0.00988833	5.39215	0.000302396	0.0139922	up	yes
Zm00001d015028	11.2372	0.271319	5.37215	1.67626e-35	6.90304e-32	up	yes
Zm00001d044323	7.85762	0.194138	5.33894	8.97733e-06	0.00071786	up	yes
Zm00001d038544	0.859837	0.021839	5.29908	5.90883e-06	0.000500428	up	yes
Zm00001d010496	0.88394	0.022744	5.28039	0.00102041	0.0341276	up	yes
Zm00001d034172	8.44626	0.22064	5.25854	3.70185e-09	6.15947e-07	up	yes
Zm00001d046049	2.27054	0.059598	5.25163	0.00106908	0.035469	up	yes
Zm00001d002231	0.428018	0.01235	5.11509	1.34011e-05	0.00103396	up	yes
Zm00001d006902	0.561629	0.01627	5.10933	0.000198021	0.0100987	up	yes
Zm00001d036999	0.412349	0.0127487	5.01545	0.00011693	0.00653414	up	yes
Zm00001d046962	13.7133	0.431144	4.99126	1.14469e-43	9.42798e-40	up	yes
Zm00001d003120	6.69153	0.215911	4.95383	5.87944e-51	9.68491e-47	up	yes
Zm00001d048268	1.5604	0.054708	4.83402	0.000995688	0.0334383	up	yes
Zm00001d050836	0.475405	0.016716	4.82985	0.000735079	0.0268483	up	yes
Zm00001d042353	1.773	0.062871	4.81765	4.72863e-23	8.13814e-20	up	yes
Zm00001d002062	1.56588	0.0557467	4.81195	3.27115e-07	3.64081e-05	up	yes
Zm00001d004885	0.742343	0.0278013	4.73886	1.86894e-08	2.55486e-06	up	yes
Zm00001d018158	2.19451	0.0823403	4.73616	0.000472671	0.0195876	up	yes
Zm00001d008768	0.621874	0.0248887	4.64306	5.50883e-05	0.00343078	up	yes
Zm00001d034854	1.08324	0.0434743	4.63904	0.000117847	0.00655825	up	yes
Zm00001d008632	1.48979	0.063622	4.54944	3.58031e-07	3.93177e-05	up	yes
Zm00001d042528	1.14494	0.0493643	4.53566	4.61544e-06	0.000401202	up	yes
Zm00001d053631	0.979722	0.0439747	4.47763	5.8942e-06	0.000500428	up	yes
Zm00001d003482	9.00326	0.418409	4.42746	0.000233188	0.0113752	up	yes
Zm00001d009041	3.33604	0.15593	4.41917	8.60771e-26	1.89054e-22	up	yes
Zm00001d005432	0.491709	0.0244955	4.32722	1.77001e-05	0.00131172	up	yes
Zm00001d041814	9.07263	0.46775	4.27771	2.62965e-05	0.00181849	up	yes
Zm00001d027071	2.43597	0.1301	4.2268	0.000281581	0.0131771	up	yes
Zm00001d032084	87.794	4.76065	4.20489	3.81472e-10	7.71018e-08	up	yes
Zm00001d033978	1.45177	0.0796203	4.18853	5.11809e-12	1.54693e-09	up	yes
Zm00001d019822	3.00444	0.173163	4.1169	0.000103893	0.00593201	up	yes
Zm00001d003086	16.3243	0.946927	4.10763	7.15812e-06	0.00058956	up	yes
Zm00001d038078	0.93638	0.0546063	4.09995	3.50039e-05	0.00234391	up	yes
Zm00001d045106	0.309444	0.0190174	4.02429	0.000431793	0.0181679	up	yes
Zm00001d017814	5.29297	0.325725	4.02235	2.38266e-05	0.00167728	up	yes
Zm00001d046703	0.445923	0.0275787	4.01517	0.000693182	0.0256883	up	yes
Zm00001d036628	1.2144	0.0751677	4.01398	1.84024e-07	2.20461e-05	up	yes
Zm00001d042888	1.08351	0.0676025	4.0025	2.33816e-07	2.70283e-05	up	yes
Zm00001d047705	36.4067	2.28298	3.99522	4.22974e-14	1.6789e-11	up	yes
Zm00001d048548	1.10179	0.0692657	3.99157	0.000731615	0.0267812	up	yes
Zm00001d004380	7.61877	0.512988	3.89256	2.40126e-07	2.75643e-05	up	yes
Zm00001d051974	4.04691	0.276078	3.87367	1.72414e-11	4.61804e-09	up	yes
Zm00001d002681	0.903286	0.062722	3.84814	0.000179729	0.0094286	up	yes
Zm00001d024560	3.75193	0.264983	3.82366	5.87462e-05	0.00361756	up	yes
Zm00001d002599	0.318433	0.0230742	3.78664	0.000130012	0.00713876	up	yes
Zm00001d041772	8.22888	0.600769	3.77581	1.12905e-26	2.6569e-23	up	yes
Zm00001d006066	0.528466	0.0404084	3.70908	4.17329e-09	6.84024e-07	up	yes
Zm00001d011656	1.15697	0.088583	3.70718	1.41998e-06	0.000136388	up	yes
Zm00001d053365	10.8209	0.829243	3.70589	0.000376234	0.0164828	up	yes
Zm00001d048841	9.398	0.731992	3.68245	2.28828e-18	1.79494e-15	up	yes
Zm00001d040500	2.36318	0.203266	3.53929	4.79155e-08	6.23943e-06	up	yes
Zm00001d025795	1.06425	0.0944284	3.49447	1.43209e-06	0.000137152	up	yes
Zm00001d040161	0.791194	0.0713324	3.4714	0.000117202	0.00653414	up	yes
Zm00001d026273	1.3498	0.124672	3.43653	1.01911e-15	4.93743e-13	up	yes
Zm00001d002408	19.5892	1.84537	3.40807	3.14892e-06	0.000287272	up	yes
Zm00001d021929	1.71934	0.164407	3.38651	3.74156e-05	0.00245549	up	yes
Zm00001d021699	6.84616	0.688023	3.31477	8.35201e-05	0.00490476	up	yes
Zm00001d006437	1.4453	0.145285	3.31441	3.41468e-09	5.76907e-07	up	yes
Zm00001d043523	1.67022	0.168768	3.30693	1.08266e-06	0.000107759	up	yes
Zm00001d017932	1.07001	0.109097	3.29394	1.99028e-07	2.33344e-05	up	yes
Zm00001d013906	0.590781	0.0653474	3.17642	1.64953e-08	2.29299e-06	up	yes
Zm00001d052443	19.6373	2.18323	3.16906	9.23935e-32	3.0439e-28	up	yes
Zm00001d029580	2.71738	0.317129	3.09907	1.56946e-05	0.00118591	up	yes
Zm00001d046704	0.910817	0.108998	3.06286	0.000108233	0.00612669	up	yes
Zm00001d046262	1.40551	0.170163	3.0461	2.7879e-07	3.16716e-05	up	yes
Zm00001d003048	9.45906	1.15184	3.03776	3.19417e-11	8.03297e-09	up	yes
Zm00001d011394	3.40243	0.415309	3.03431	3.6707e-05	0.00242347	up	yes
Zm00001d005780	0.831698	0.10436	2.99449	3.15655e-06	0.000287272	up	yes
Zm00001d025389	5.49671	0.691085	2.99163	5.73708e-05	0.00355102	up	yes
Zm00001d021895	0.936745	0.11836	2.98448	3.55668e-05	0.00237196	up	yes
Zm00001d025782	0.549923	0.0707057	2.95933	6.68327e-06	0.000560255	up	yes
Zm00001d014885	5.64387	0.731382	2.94799	1.65532e-15	7.79063e-13	up	yes
Zm00001d016948	19.0005	2.46504	2.94635	2.72619e-07	3.10777e-05	up	yes
Zm00001d040496	4.9309	0.663345	2.89402	4.07724e-06	0.000362061	up	yes
Zm00001d043004	0.454186	0.0614047	2.88686	0.0012927	0.0407932	up	yes
Zm00001d000665	3.19726	0.432785	2.88511	3.47521e-08	4.57963e-06	up	yes
Zm00001d008466	1.76714	0.247998	2.83302	1.57129e-09	2.78312e-07	up	yes
Zm00001d018367	0.59652	0.0838197	2.83121	0.000345652	0.0153237	up	yes
Zm00001d004416	0.574307	0.0816566	2.81418	8.94523e-08	1.12053e-05	up	yes
Zm00001d002568	8.61218	1.23795	2.79843	0.000391595	0.0169084	up	yes
Zm00001d026238	0.389188	0.0579136	2.74849	1.14496e-06	0.000113616	up	yes
Zm00001d017399	0.354916	0.0533193	2.73475	8.93894e-05	0.00518474	up	yes
Zm00001d051344	0.600239	0.090326	2.73232	0.000686156	0.025514	up	yes
Zm00001d003555	0.505374	0.0807762	2.64535	0.000526459	0.0211776	up	yes
Zm00001d031332	3.31699	0.550306	2.59157	1.83026e-05	0.00134294	up	yes
Zm00001d017101	1.11397	0.186085	2.58169	0.000826551	0.0290616	up	yes
Zm00001d041873	1.5894	0.268464	2.56569	4.38908e-06	0.000385595	up	yes
Zm00001d033389	19.6518	3.39922	2.53139	0.00112211	0.0367109	up	yes
Zm00001d021636	1.04103	0.181627	2.51897	0.000241802	0.011674	up	yes
Zm00001d047345	6.71971	1.18099	2.5084	9.5406e-06	0.000759215	up	yes
Zm00001d052716	0.961892	0.173199	2.47345	0.00155182	0.046702	up	yes
Zm00001d011687	1.59928	0.294246	2.44233	3.00983e-11	7.62761e-09	up	yes
Zm00001d006447	1.67296	0.307961	2.44158	0.000583878	0.0227035	up	yes
Zm00001d052937	33.3182	6.20549	2.42469	1.93327e-14	8.06223e-12	up	yes
Zm00001d016947	8.921	1.67345	2.41438	0.000592251	0.0229278	up	yes
Zm00001d006300	0.523206	0.0989027	2.4033	0.000823921	0.0290001	up	yes
Zm00001d026339	1.11846	0.213573	2.38871	0.00111446	0.036606	up	yes
Zm00001d003059	8.8429	1.7153	2.36606	0.000137447	0.00749701	up	yes
Zm00001d041752	0.76149	0.147892	2.36428	0.000976998	0.0329112	up	yes
Zm00001d031403	48.3181	9.43117	2.35706	1.88207e-05	0.00137483	up	yes
Zm00001d011227	1.63452	0.319134	2.35663	0.00114763	0.0373234	up	yes
Zm00001d010875	1.6869	0.335608	2.32952	0.00144615	0.0443199	up	yes
Zm00001d014649	1.36885	0.280687	2.28593	8.36647e-07	8.53354e-05	up	yes
Zm00001d045581	10.5092	2.16022	2.2824	3.82313e-05	0.00250403	up	yes
Zm00001d044954	8.25954	1.71127	2.27099	0.000380999	0.0165812	up	yes
Zm00001d051468	9.87401	2.05088	2.2674	0.00139417	0.0432506	up	yes
Zm00001d017204	1.14357	0.239217	2.25715	0.000484807	0.0198859	up	yes
Zm00001d029101	20.9441	4.43458	2.23967	0.000161082	0.00864308	up	yes
Zm00001d042541	35.3849	7.57491	2.22383	0.000194411	0.00997643	up	yes
Zm00001d017416	2.42443	0.531722	2.1889	3.95632e-09	6.51705e-07	up	yes
Zm00001d026300	3.93826	0.866439	2.18439	0.00024202	0.011674	up	yes
Zm00001d035766	1.18709	0.264066	2.16845	0.000313296	0.014396	up	yes
Zm00001d006115	1.68031	0.377106	2.15569	0.000159598	0.00857742	up	yes
Zm00001d025333	28.1301	6.36614	2.14362	1.01284e-05	0.000796376	up	yes
Zm00001d039169	4.12498	0.934544	2.14205	0.000542843	0.0217038	up	yes
Zm00001d023342	5.78669	1.31358	2.13923	1.2353e-09	2.2361e-07	up	yes
Zm00001d030290	2.03498	0.47578	2.09665	7.32099e-06	0.000601471	up	yes
Zm00001d005828	6.42193	1.52884	2.07057	1.32941e-13	4.7606e-11	up	yes
Zm00001d025016	2.46855	0.599047	2.04292	0.00128112	0.0405442	up	yes
Zm00001d045225	0.264819	0.064275	2.04268	0.00129148	0.0407932	up	yes
Zm00001d044729	1.1456	0.278733	2.03915	0.00164808	0.0488273	up	yes
Zm00001d009658	1.70304	0.425187	2.00194	0.000494707	0.020221	up	yes
