# Supplementary material for: Morphological characterization and transcriptome analysis of leaf angle mutant bhlh112 in maize [Zea mays L.]
Source: Front Plant Sci. 2022 Oct 7;13:995815. doi: 10.3389/fpls.2022.995815 (PMC9585351; doi:10.3389/fpls.2022.995815)
Supplement: Supplementary file 6 [file Table_6.xlsx]

## Sheet: DOWN
Supplementary Table S6 DEGs regulated leaf angle in bhlh112 under IAA treatment group
gene_id	FPKM.b112_I	FPKM.b112_CK	log2(fc) (b112_I VS b112_CK)	pval (b112_I VS b112_CK)	qval (b112_I VS b112_CK)	regulation	significant
Zm00001d005892	0	6.02729	-15.8792	4.71003e-19	2.35681e-16	down	yes
Zm00001d002062	0	1.87179	-14.1921	2.00748e-09	2.6702e-07	down	yes
Zm00001d025676	0	1.68531	-14.0407	1.32895e-10	2.18197e-08	down	yes
Zm00001d001694	0	1.64146	-14.0027	5.07793e-13	1.2506e-10	down	yes
Zm00001d027932	0	1.34418	-13.7144	1.9954e-10	3.16096e-08	down	yes
Zm00001d009945	0	1.27509	-13.6383	6.92061e-10	1.03396e-07	down	yes
Zm00001d039297	0	1.06701	-13.3813	4.34262e-08	4.48848e-06	down	yes
Zm00001d018158	0	0.843182	-13.0416	1.72263e-07	1.52113e-05	down	yes
Zm00001d007147	0	0.747037	-12.867	5.39201e-08	5.39612e-06	down	yes
Zm00001d034611	0	0.584196	-12.5122	0.0012088	0.0258697	down	yes
Zm00001d038665	0	0.522917	-12.3524	5.44136e-09	6.54707e-07	down	yes
Zm00001d011751	0	0.478059	-12.223	0.00032401	0.00956376	down	yes
Zm00001d045231	0	0.460907	-12.1703	1.62914e-06	0.000110445	down	yes
Zm00001d001852	0	0.445007	-12.1196	2.63553e-06	0.000167505	down	yes
Zm00001d044372	0	0.43639	-12.0914	1.68898e-10	2.73043e-08	down	yes
Zm00001d012957	0	0.398403	-11.96	2.10472e-07	1.80788e-05	down	yes
Zm00001d043323	0	0.354556	-11.7918	0.00104969	0.0232867	down	yes
Zm00001d011666	0	0.343163	-11.7447	4.76978e-08	4.8661e-06	down	yes
Zm00001d025664	0	0.328316	-11.6809	5.28055e-07	4.02087e-05	down	yes
Zm00001d007340	0	0.324321	-11.6632	8.30058e-05	0.00312625	down	yes
Zm00001d048374	0	0.324181	-11.6626	0.000763536	0.0185294	down	yes
Zm00001d023443	0	0.319783	-11.6429	0.000342254	0.0100458	down	yes
Zm00001d010397	0	0.313772	-11.6155	9.34767e-07	6.75862e-05	down	yes
Zm00001d052102	0	0.313472	-11.6141	0.000292059	0.00878886	down	yes
Zm00001d009081	0	0.250088	-11.2882	0.00247809	0.044185	down	yes
Zm00001d037580	0	0.230896	-11.173	0.000150058	0.00509744	down	yes
Zm00001d018093	0	0.230145	-11.1683	9.5796e-06	0.000515337	down	yes
Zm00001d034946	0	0.229624	-11.1651	0.00024196	0.00752965	down	yes
Zm00001d022904	0	0.228299	-11.1567	0.00117368	0.0253072	down	yes
Zm00001d023089	0	0.21765	-11.0878	0.000588852	0.0152727	down	yes
Zm00001d039487	0	0.20618	-11.0097	8.34788e-07	6.07756e-05	down	yes
Zm00001d030914	0	0.19362	-10.919	0.000919563	0.021268	down	yes
Zm00001d002360	0	0.115633	-10.1753	0.00149011	0.0304633	down	yes
Zm00001d022530	0	0.114501	-10.1611	0.00195977	0.0373518	down	yes
Zm00001d053208	0	0.103411	-10.0142	0.00255357	0.0450974	down	yes
Zm00001d017453	0	0.099752	-9.9622	0.000109386	0.00389635	down	yes
Zm00001d046958	0	0.0794307	-9.63355	0.00269968	0.0467865	down	yes
Zm00001d030253	0	0.075431	-9.55901	0.00275169	0.047505	down	yes
Zm00001d021205	0.02325	14.9883	-9.33239	3.43952e-25	2.85336e-22	down	yes
Zm00001d018189	0	0.058378	-9.18928	0.00155397	0.0312818	down	yes
Zm00001d008001	0	0.036878	-8.52662	0.00244847	0.0438057	down	yes
Zm00001d053109	0	0.0308356	-8.26845	0.000460291	0.0126506	down	yes
Zm00001d053603	0	0.0301395	-8.23551	3.79137e-05	0.00164174	down	yes
Zm00001d006169	0.00988533	1.37764	-7.1227	6.72398e-07	5.02291e-05	down	yes
Zm00001d012642	0.0116293	1.43236	-6.94448	7.51212e-08	7.33164e-06	down	yes
Zm00001d012956	0.0566617	6.60958	-6.86604	1.48358e-12	3.41374e-10	down	yes
Zm00001d006948	0.004868	0.563814	-6.85575	9.70111e-12	1.96037e-09	down	yes
Zm00001d044387	0.0718083	7.86788	-6.77568	2.99409e-12	6.55455e-10	down	yes
Zm00001d036003	0.294291	21.901	-6.21761	1.55628e-28	1.75215e-25	down	yes
Zm00001d037526	0.0170967	1.22418	-6.16196	9.78186e-09	1.11726e-06	down	yes
Zm00001d006240	0.0161147	1.15283	-6.16066	9.24824e-09	1.06792e-06	down	yes
Zm00001d022461	0.0124797	0.832914	-6.06052	1.03269e-05	0.000545331	down	yes
Zm00001d002410	0.677195	44.7678	-6.04675	7.82617e-47	3.52446e-43	down	yes
Zm00001d018729	0.039972	2.23418	-5.80461	2.61496e-06	0.00016687	down	yes
Zm00001d009309	2.16158	118.087	-5.77162	4.40026e-73	3.46785e-69	down	yes
Zm00001d031796	0.442285	23.1336	-5.70887	0.000127825	0.00443782	down	yes
Zm00001d003903	0.191327	9.84208	-5.68485	7.67209e-10	1.12491e-07	down	yes
Zm00001d031880	0.00830433	0.42046	-5.66196	0.000456767	0.0125647	down	yes
Zm00001d004945	0.120371	5.997	-5.63868	3.33735e-05	0.0014797	down	yes
Zm00001d051451	0.0401713	1.95388	-5.60403	3.27804e-15	1.09933e-12	down	yes
Zm00001d004949	0.127443	6.13802	-5.58985	2.99243e-05	0.00134762	down	yes
Zm00001d035306	0.160611	7.35598	-5.51728	4.34268e-08	4.48848e-06	down	yes
Zm00001d018107	1.39	60.3621	-5.44048	3.81559e-92	6.01413e-88	down	yes
Zm00001d034130	0.296281	12.837	-5.4372	1.97497e-30	2.59413e-27	down	yes
Zm00001d034787	0.123839	5.24086	-5.40326	1.33809e-12	3.10161e-10	down	yes
Zm00001d015697	0.0134167	0.53491	-5.3172	0.00276321	0.0476235	down	yes
Zm00001d018811	0.014078	0.552795	-5.29523	7.09834e-06	0.000393958	down	yes
Zm00001d038560	0.0203817	0.791261	-5.27881	0.000331741	0.00976451	down	yes
Zm00001d024522	2.9039	112.501	-5.2758	4.05509e-26	3.78685e-23	down	yes
Zm00001d048268	0.014442	0.483252	-5.06443	0.0012587	0.0267021	down	yes
Zm00001d037165	0.0335327	1.07047	-4.99654	9.74123e-09	1.11666e-06	down	yes
Zm00001d018819	0.149484	4.73788	-4.98618	5.2048e-25	4.19604e-22	down	yes
Zm00001d016947	0.428604	12.9157	-4.91334	7.07097e-08	6.94409e-06	down	yes
Zm00001d021208	1.32784	39.7238	-4.90285	5.99979e-33	9.00654e-30	down	yes
Zm00001d029353	0.0156943	0.45638	-4.86192	0.000302724	0.00903699	down	yes
Zm00001d009985	1.49404	43.4145	-4.86089	8.7473e-106	2.7575e-101	down	yes
Zm00001d052530	0.531882	15.102	-4.82749	1.85552e-10	2.96068e-08	down	yes
Zm00001d013097	0.393799	11.1233	-4.81999	8.25801e-26	7.23127e-23	down	yes
Zm00001d050689	0.208067	5.87497	-4.81946	3.96858e-24	2.97871e-21	down	yes
Zm00001d012505	0.111585	3.0285	-4.76239	0.000786245	0.0189059	down	yes
Zm00001d024851	0.009312	0.248721	-4.7393	0.00035673	0.010336	down	yes
Zm00001d021216	0.0179313	0.476389	-4.73158	0.00102749	0.0229234	down	yes
Zm00001d032120	1.97938	52.458	-4.72804	3.77078e-45	1.48588e-41	down	yes
Zm00001d021973	0.0500323	1.32079	-4.7224	1.88223e-22	1.23616e-19	down	yes
Zm00001d014253	0.329762	8.47462	-4.68365	6.61519e-05	0.00261325	down	yes
Zm00001d038641	0.0201927	0.505915	-4.64699	0.00104003	0.0231376	down	yes
Zm00001d024324	0.585206	14.3777	-4.61875	3.12307e-12	6.74326e-10	down	yes
Zm00001d020265	0.025346	0.620966	-4.61469	0.000915532	0.0212023	down	yes
Zm00001d003538	1.21032	28.0609	-4.53511	3.45616e-26	3.40475e-23	down	yes
Zm00001d043128	0.086747	1.94131	-4.48407	3.44719e-14	9.87902e-12	down	yes
Zm00001d033050	1.75964	38.5113	-4.45193	7.12222e-18	3.07563e-15	down	yes
Zm00001d029668	0.819157	17.1324	-4.38644	3.94567e-37	1.03653e-33	down	yes
Zm00001d017592	1.76834	36.9146	-4.38372	4.57427e-19	2.34126e-16	down	yes
Zm00001d003190	0.0793783	1.64456	-4.37281	6.76568e-05	0.00265606	down	yes
Zm00001d029667	0.836874	17.3375	-4.37274	1.35058e-35	2.83839e-32	down	yes
Zm00001d040461	0.422272	8.58245	-4.34514	2.45733e-12	5.45528e-10	down	yes
Zm00001d043318	0.438331	8.80027	-4.32745	1.55314e-36	3.76624e-33	down	yes
Zm00001d003784	0.039378	0.777075	-4.30259	2.06715e-05	0.000975523	down	yes
Zm00001d015614	0.523616	10.1785	-4.28086	1.12143e-10	1.88042e-08	down	yes
Zm00001d021816	0.713578	13.4801	-4.23961	3.0846e-15	1.04558e-12	down	yes
Zm00001d037724	2.79934	52.4384	-4.22746	3.6607e-11	6.7093e-09	down	yes
Zm00001d051468	1.5051	27.9188	-4.21331	6.18564e-24	4.34787e-21	down	yes
Zm00001d053995	0.198323	3.65678	-4.20465	4.53282e-05	0.00191867	down	yes
Zm00001d028838	0.686477	11.8463	-4.10908	1.57078e-07	1.39879e-05	down	yes
Zm00001d018288	0.149794	2.57647	-4.10435	6.17687e-13	1.49784e-10	down	yes
Zm00001d034783	0.41618	7.07679	-4.08781	9.24111e-11	1.56622e-08	down	yes
Zm00001d040148	1.54793	26.3076	-4.08707	6.66817e-17	2.53262e-14	down	yes
Zm00001d052205	0.237842	4.01073	-4.07579	6.63343e-09	7.89102e-07	down	yes
Zm00001d012641	0.455297	7.51816	-4.0455	7.39228e-42	2.11849e-38	down	yes
Zm00001d039524	3.84434	63.0909	-4.03662	5.14061e-08	5.1774e-06	down	yes
Zm00001d044373	0.139038	2.25007	-4.01642	2.65917e-06	0.000168329	down	yes
Zm00001d034461	0.693609	10.9795	-3.98455	1.51596e-21	9.19024e-19	down	yes
Zm00001d025005	0.199491	3.11493	-3.9648	5.27499e-10	8.07227e-08	down	yes
Zm00001d043701	0.292144	4.55145	-3.96157	7.76207e-08	7.55221e-06	down	yes
Zm00001d033385	0.776702	11.9595	-3.94465	5.83141e-20	3.34235e-17	down	yes
Zm00001d018106	0.893061	13.6946	-3.93871	4.60468e-19	2.34126e-16	down	yes
Zm00001d015559	0.0147257	0.225325	-3.9356	0.00032516	0.00958871	down	yes
Zm00001d024850	0.01354	0.207046	-3.93465	0.000560033	0.0146389	down	yes
Zm00001d015025	3.98261	60.6759	-3.92934	1.05047e-19	5.70948e-17	down	yes
Zm00001d034453	1.98181	29.9571	-3.91801	1.25985e-21	7.78735e-19	down	yes
Zm00001d042574	0.0581537	0.865424	-3.89547	0.000722563	0.0177729	down	yes
Zm00001d017648	0.130468	1.93241	-3.88864	0.000103962	0.00374978	down	yes
Zm00001d030304	0.460805	6.58074	-3.83602	1.15027e-06	8.07594e-05	down	yes
Zm00001d044769	9.15453	130.056	-3.8285	3.33885e-12	7.06401e-10	down	yes
Zm00001d051313	0.07946	1.12769	-3.827	0.000736155	0.0179896	down	yes
Zm00001d002547	0.045419	0.639656	-3.81593	0.000530205	0.0140455	down	yes
Zm00001d004380	0.470102	6.5803	-3.80711	2.23347e-15	7.91099e-13	down	yes
Zm00001d002618	4.79071	66.5939	-3.79708	4.08428e-26	3.78685e-23	down	yes
Zm00001d046867	0.102928	1.42853	-3.79483	0.00059205	0.0153233	down	yes
Zm00001d027988	6.44316	89.1517	-3.79042	1.45096e-28	1.69408e-25	down	yes
Zm00001d011403	0.0657347	0.906919	-3.78625	1.09329e-11	2.16761e-09	down	yes
Zm00001d007697	0.029056	0.399867	-3.78261	4.94521e-05	0.0020648	down	yes
Zm00001d017591	0.559579	7.69215	-3.78097	4.40451e-17	1.75757e-14	down	yes
Zm00001d042063	0.437971	6.01033	-3.77854	0.000934442	0.021486	down	yes
Zm00001d030672	0.0123316	0.164546	-3.73806	0.000793815	0.0190154	down	yes
Zm00001d010434	0.171749	2.28311	-3.73263	1.09099e-09	1.53561e-07	down	yes
Zm00001d027901	8.58033	111.731	-3.70285	6.31133e-35	1.17034e-31	down	yes
Zm00001d016948	0.915147	11.8006	-3.68872	0.000883979	0.0206266	down	yes
Zm00001d042758	0.365858	4.58144	-3.64645	6.84557e-08	6.74374e-06	down	yes
Zm00001d043706	1.37957	17.2108	-3.64102	9.50863e-08	8.86834e-06	down	yes
Zm00001d012939	0.13143	1.63625	-3.63803	0.00041602	0.0116574	down	yes
Zm00001d038793	0.221896	2.75423	-3.63369	0.000962104	0.021922	down	yes
Zm00001d025141	1.80475	22.3763	-3.6321	6.66147e-06	0.000372334	down	yes
Zm00001d016719	2.05636	25.4715	-3.63072	7.57836e-20	4.19123e-17	down	yes
Zm00001d022435	4.34743	52.2844	-3.58815	2.22385e-14	6.55182e-12	down	yes
Zm00001d044752	1.36921	16.3166	-3.57492	1.81033e-33	2.85344e-30	down	yes
Zm00001d014166	0.776451	9.19215	-3.56544	5.30927e-42	1.67369e-38	down	yes
Zm00001d040460	0.284385	3.27565	-3.52587	5.44085e-05	0.0022333	down	yes
Zm00001d021207	0.170346	1.94076	-3.51008	1.45916e-10	2.37106e-08	down	yes
Zm00001d002592	1.05027	11.9553	-3.50881	4.86735e-17	1.91798e-14	down	yes
Zm00001d021576	1.56896	17.6768	-3.49397	6.84189e-35	1.19824e-31	down	yes
Zm00001d011654	0.255706	2.84193	-3.47431	6.68915e-11	1.17149e-08	down	yes
Zm00001d029356	0.739972	8.19922	-3.46994	1.73997e-11	3.38586e-09	down	yes
Zm00001d029955	0.486402	5.30758	-3.44783	6.59208e-17	2.53262e-14	down	yes
Zm00001d034508	0.450382	4.86537	-3.43333	1.77443e-07	1.55814e-05	down	yes
Zm00001d048841	0.882372	9.50348	-3.429	1.44608e-05	0.000719024	down	yes
Zm00001d006170	0.9818	10.5457	-3.42509	7.38911e-18	3.14776e-15	down	yes
Zm00001d053746	2.89358	30.827	-3.41327	2.0927e-12	4.67873e-10	down	yes
Zm00001d044688	1.20091	12.7623	-3.40969	3.16787e-12	6.79347e-10	down	yes
Zm00001d023348	0.124564	1.29854	-3.38193	8.92431e-05	0.00331366	down	yes
Zm00001d021677	0.64928	6.69674	-3.36655	7.40066e-10	1.09018e-07	down	yes
Zm00001d011434	0.320474	3.28471	-3.35749	5.13572e-06	0.000299258	down	yes
Zm00001d038316	0.048725	0.499349	-3.35732	0.000948403	0.0216805	down	yes
Zm00001d017032	0.285976	2.92486	-3.3544	0.00230322	0.0421398	down	yes
Zm00001d043060	0.44133	4.43398	-3.32867	2.13611e-18	9.90276e-16	down	yes
Zm00001d048263	4.07739	39.98	-3.29356	4.04362e-12	8.4418e-10	down	yes
Zm00001d034642	0.395315	3.79684	-3.26372	0.000211346	0.00672977	down	yes
Zm00001d028374	0.576483	5.52648	-3.26101	5.3629e-09	6.50231e-07	down	yes
Zm00001d041387	0.70549	6.67622	-3.24233	6.82912e-15	2.17456e-12	down	yes
Zm00001d018973	11.8606	112.102	-3.24056	3.22031e-19	1.69195e-16	down	yes
Zm00001d046988	0.0855217	0.803626	-3.23216	0.000727492	0.0178269	down	yes
Zm00001d052152	0.492246	4.62215	-3.23111	1.68995e-07	1.49646e-05	down	yes
Zm00001d013109	3.75041	35.1985	-3.23039	1.65309e-13	4.27146e-11	down	yes
Zm00001d002620	0.299159	2.79956	-3.22622	4.93829e-16	1.83147e-13	down	yes
Zm00001d014491	18.074	168.022	-3.21666	2.16801e-14	6.44758e-12	down	yes
Zm00001d047674	0.147796	1.35932	-3.20121	7.64939e-05	0.00291936	down	yes
Zm00001d034205	3.19843	29.2078	-3.19092	1.78106e-18	8.50697e-16	down	yes
Zm00001d052736	0.0592313	0.536421	-3.17893	0.00280294	0.0479696	down	yes
Zm00001d033862	0.549584	4.97154	-3.17728	6.10012e-15	1.96225e-12	down	yes
Zm00001d011656	0.594601	5.36549	-3.17372	1.61931e-06	0.000110015	down	yes
Zm00001d029359	0.720868	6.25141	-3.11637	5.67201e-05	0.00230716	down	yes
Zm00001d020332	3.32853	28.8353	-3.11488	2.42814e-13	6.12359e-11	down	yes
Zm00001d033049	0.403251	3.45152	-3.09748	7.81523e-05	0.00296471	down	yes
Zm00001d013003	10.807	91.4299	-3.0807	1.00604e-12	2.36674e-10	down	yes
Zm00001d048294	0.699819	5.91255	-3.07873	5.67742e-06	0.000324819	down	yes
Zm00001d008573	3.05919	25.6561	-3.06808	4.98529e-09	6.11502e-07	down	yes
Zm00001d035901	5.06492	42.4272	-3.06638	2.80303e-05	0.00127324	down	yes
Zm00001d018225	0.152866	1.27722	-3.06267	1.71759e-05	0.000831726	down	yes
Zm00001d015289	2.07715	17.1231	-3.04326	1.15109e-13	3.04931e-11	down	yes
Zm00001d027900	3.97872	32.2402	-3.01848	4.04204e-34	6.70638e-31	down	yes
Zm00001d009328	1.60484	12.8931	-3.0061	2.5259e-11	4.73968e-09	down	yes
Zm00001d039944	2.23177	17.6237	-2.98125	1.99549e-11	3.7895e-09	down	yes
Zm00001d033957	1.8462	14.5004	-2.97346	7.75391e-19	3.81929e-16	down	yes
Zm00001d038448	3.1307	24.1407	-2.94691	5.32424e-25	4.19604e-22	down	yes
Zm00001d010788	1.37688	10.6034	-2.94505	5.90583e-15	1.91933e-12	down	yes
Zm00001d010385	0.439286	3.37732	-2.94265	0.000381748	0.0109006	down	yes
Zm00001d025851	0.071687	0.550661	-2.94138	6.56445e-07	4.92709e-05	down	yes
Zm00001d036768	0.572073	4.39075	-2.9402	1.529e-11	3.01251e-09	down	yes
Zm00001d047055	0.0978487	0.745885	-2.93033	9.71679e-08	9.03575e-06	down	yes
Zm00001d041148	0.249536	1.88749	-2.91915	0.000866367	0.0202908	down	yes
Zm00001d048208	2.58311	19.4551	-2.91297	1.56431e-12	3.5395e-10	down	yes
Zm00001d029777	3.1573	23.7681	-2.91226	4.97856e-14	1.41391e-11	down	yes
Zm00001d043196	6.43925	48.134	-2.90209	0.00174391	0.0341036	down	yes
Zm00001d026657	2.734	20.161	-2.88248	7.40191e-05	0.00285254	down	yes
Zm00001d003533	4.68056	34.2157	-2.8699	6.60869e-87	6.94441e-83	down	yes
Zm00001d008587	0.428307	3.12564	-2.86743	0.000220419	0.00695602	down	yes
Zm00001d013163	4.5237	32.6224	-2.85029	2.42368e-30	3.05616e-27	down	yes
Zm00001d027899	1.77773	12.8038	-2.84846	0.000106219	0.00381373	down	yes
Zm00001d028826	1.1533	8.2616	-2.84065	1.82755e-24	1.40516e-21	down	yes
Zm00001d002623	0.584884	4.17081	-2.83411	7.27713e-11	1.25358e-08	down	yes
Zm00001d018191	0.188816	1.32952	-2.81585	0.00101384	0.0227119	down	yes
Zm00001d036726	3.14946	22.0246	-2.80594	8.51845e-05	0.00318926	down	yes
Zm00001d053236	1.00789	7.04406	-2.80507	4.69816e-12	9.68005e-10	down	yes
Zm00001d038780	5.35124	37.3924	-2.8048	8.94872e-49	4.70166e-45	down	yes
Zm00001d044762	1.28248	8.88738	-2.79282	6.23075e-05	0.00248946	down	yes
Zm00001d042887	2.41764	16.7237	-2.79022	6.5273e-18	2.85787e-15	down	yes
Zm00001d012321	3.69759	25.297	-2.77431	2.10563e-15	7.54292e-13	down	yes
Zm00001d003249	0.612056	4.17871	-2.77132	2.57278e-08	2.78019e-06	down	yes
Zm00001d043062	5.04062	33.9515	-2.7518	3.26539e-09	4.11752e-07	down	yes
Zm00001d051340	0.038351	0.258219	-2.75126	0.000737002	0.0179963	down	yes
Zm00001d053815	0.56428	3.77653	-2.74258	8.68427e-05	0.00324364	down	yes
Zm00001d043702	2.3479	15.6676	-2.73834	9.46169e-13	2.25962e-10	down	yes
Zm00001d018306	0.238725	1.57515	-2.72207	2.2765e-07	1.92915e-05	down	yes
Zm00001d001907	2.16342	14.2561	-2.7202	1.55989e-15	5.65219e-13	down	yes
Zm00001d051496	0.867758	5.63612	-2.69934	4.94591e-07	3.79355e-05	down	yes
Zm00001d010617	0.922725	5.89903	-2.6765	0.000287057	0.00866782	down	yes
Zm00001d013004	0.404126	2.5732	-2.67068	7.15368e-06	0.000396331	down	yes
Zm00001d012415	2.70244	17.0459	-2.65709	1.86732e-08	2.06545e-06	down	yes
Zm00001d038766	0.671395	4.18974	-2.64163	9.00251e-09	1.04454e-06	down	yes
Zm00001d033389	5.608	34.9051	-2.63788	1.08912e-05	0.000571273	down	yes
Zm00001d018807	0.444191	2.75943	-2.63512	2.80225e-08	3.00469e-06	down	yes
Zm00001d004138	16.9029	104.811	-2.63245	2.6948e-10	4.22641e-08	down	yes
Zm00001d018491	2.38151	14.7125	-2.62709	4.09077e-09	5.07706e-07	down	yes
Zm00001d022460	0.328347	2.02277	-2.62304	0.000113381	0.00401598	down	yes
Zm00001d045460	6.17871	37.8469	-2.6148	8.25772e-45	2.8924e-41	down	yes
Zm00001d021605	1.12011	6.77046	-2.59562	0.000418803	0.0116938	down	yes
Zm00001d043740	0.700227	4.23085	-2.59505	0.000767797	0.0185614	down	yes
Zm00001d036623	0.279893	1.6896	-2.59373	4.84103e-05	0.00202399	down	yes
Zm00001d044390	2.83429	17.0209	-2.58625	4.67065e-28	5.07716e-25	down	yes
Zm00001d027483	4.09075	24.509	-2.58288	6.51344e-13	1.5674e-10	down	yes
Zm00001d038969	0.290775	1.71428	-2.55963	1.70277e-05	0.000825818	down	yes
Zm00001d047679	0.477025	2.79117	-2.54873	4.14625e-06	0.000248965	down	yes
Zm00001d006493	1.72434	10.0854	-2.54815	2.71804e-09	3.51162e-07	down	yes
Zm00001d029506	4.51075	26.3547	-2.54662	2.89306e-08	3.09155e-06	down	yes
Zm00001d044861	5.34433	31.2108	-2.54596	1.887e-14	5.66532e-12	down	yes
Zm00001d017084	1.54573	8.9751	-2.53764	2.83394e-06	0.000177963	down	yes
Zm00001d044300	11.6524	67.5353	-2.53501	6.20652e-24	4.34787e-21	down	yes
Zm00001d020137	12.9343	74.3172	-2.52249	3.04831e-07	2.48951e-05	down	yes
Zm00001d050961	4.22689	24.2782	-2.52199	1.77748e-14	5.38781e-12	down	yes
Zm00001d003185	0.117977	0.677155	-2.52098	4.74938e-06	0.000279327	down	yes
Zm00001d003504	6.11829	35.0834	-2.51959	2.52671e-15	8.75296e-13	down	yes
Zm00001d025319	0.618007	3.50714	-2.5046	2.56043e-06	0.000164055	down	yes
Zm00001d043258	1.92375	10.8075	-2.49004	7.97366e-08	7.71048e-06	down	yes
Zm00001d015227	0.482416	2.70996	-2.48992	1.0208e-13	2.72709e-11	down	yes
Zm00001d044345	0.201036	1.12195	-2.48048	0.00010736	0.00383722	down	yes
Zm00001d042449	5.09807	28.45	-2.4804	0.000171551	0.00569259	down	yes
Zm00001d032401	0.229598	1.27623	-2.4747	0.000132955	0.00458063	down	yes
Zm00001d013834	2.54832	14.0236	-2.46024	1.15214e-21	7.26403e-19	down	yes
Zm00001d017699	4.88041	26.3786	-2.43429	2.42806e-09	3.1629e-07	down	yes
Zm00001d038998	1.49849	8.06248	-2.42771	8.35482e-19	4.05196e-16	down	yes
Zm00001d038563	0.380128	2.03542	-2.42077	9.06088e-06	0.000490782	down	yes
Zm00001d020521	0.921338	4.8983	-2.41048	2.99164e-09	3.81816e-07	down	yes
Zm00001d039859	1.24658	6.55733	-2.39514	9.06917e-08	8.48358e-06	down	yes
Zm00001d033777	0.997806	5.2262	-2.38893	8.99035e-08	8.43488e-06	down	yes
Zm00001d002906	0.299062	1.56091	-2.38387	0.00237243	0.0429326	down	yes
Zm00001d035039	9.17137	47.8296	-2.38269	2.53737e-12	5.59358e-10	down	yes
Zm00001d013638	0.640028	3.33525	-2.38159	1.09197e-11	2.16761e-09	down	yes
Zm00001d007175	5.50427	28.6788	-2.38136	7.23363e-07	5.34035e-05	down	yes
Zm00001d045557	18.7443	96.1517	-2.35886	6.74374e-11	1.17453e-08	down	yes
Zm00001d020614	33.2528	169.713	-2.35155	4.96792e-08	5.03565e-06	down	yes
Zm00001d028017	0.330563	1.68371	-2.34865	0.000158713	0.00533966	down	yes
Zm00001d017762	29.7492	151.377	-2.34722	5.96477e-12	1.21312e-09	down	yes
Zm00001d002364	3.44904	17.5272	-2.34533	1.23885e-05	0.000635017	down	yes
Zm00001d017612	4.5144	22.9277	-2.34449	9.99392e-22	6.42956e-19	down	yes
Zm00001d042963	3.68308	18.6934	-2.34354	4.91033e-21	2.92063e-18	down	yes
Zm00001d022415	39.8571	202.239	-2.34315	5.66986e-09	6.79607e-07	down	yes
Zm00001d021946	8.71634	44.2187	-2.34286	9.51476e-18	3.99924e-15	down	yes
Zm00001d010218	0.469131	2.36128	-2.33151	0.000146549	0.00500502	down	yes
Zm00001d047664	0.630442	3.16767	-2.32899	3.97544e-06	0.000239802	down	yes
Zm00001d022245	0.654531	3.2868	-2.32815	8.69099e-08	8.25911e-06	down	yes
Zm00001d042107	7.42108	37.0994	-2.32169	8.69822e-08	8.25911e-06	down	yes
Zm00001d002733	1.00103	4.99605	-2.3193	3.34698e-05	0.00147981	down	yes
Zm00001d052523	0.84746	4.22683	-2.31836	6.14736e-05	0.00246238	down	yes
Zm00001d008153	3.45119	17.2033	-2.31752	3.05465e-10	4.74359e-08	down	yes
Zm00001d003743	1.17621	5.79542	-2.30077	1.2374e-10	2.0639e-08	down	yes
Zm00001d014244	0.517722	2.54977	-2.30012	1.16457e-14	3.63484e-12	down	yes
Zm00001d030004	1.33703	6.58213	-2.29952	4.98356e-06	0.000291404	down	yes
Zm00001d034031	9.93767	48.8389	-2.29705	5.18914e-67	3.27165e-63	down	yes
Zm00001d013947	0.27093	1.32039	-2.28497	0.00212518	0.0395946	down	yes
Zm00001d049630	0.757859	3.6865	-2.28225	1.17852e-08	1.32212e-06	down	yes
Zm00001d050247	1.61789	7.85808	-2.28006	3.87422e-07	3.09977e-05	down	yes
Zm00001d012325	1.16359	5.62205	-2.27252	2.75144e-09	3.54026e-07	down	yes
Zm00001d021882	48.1659	231.757	-2.26653	5.02774e-09	6.14319e-07	down	yes
Zm00001d034221	5.83833	28.0674	-2.26527	3.20686e-27	3.36977e-24	down	yes
Zm00001d031044	0.156047	0.747588	-2.26026	0.000628564	0.0159668	down	yes
Zm00001d021665	3.2764	15.6866	-2.25935	1.12916e-05	0.000585452	down	yes
Zm00001d042811	3.10005	14.8376	-2.25889	2.75479e-11	5.13858e-09	down	yes
Zm00001d021736	0.470122	2.24679	-2.25676	1.93206e-06	0.000129039	down	yes
Zm00001d018350	1.31342	6.27231	-2.25566	5.2123e-05	0.00214507	down	yes
Zm00001d014007	2.52369	11.9613	-2.24477	1.9742e-11	3.7895e-09	down	yes
Zm00001d010676	0.934776	4.42387	-2.24262	0.000362439	0.0104667	down	yes
Zm00001d052189	0.43291	2.03124	-2.23022	1.95233e-06	0.000130117	down	yes
Zm00001d003048	1.13761	5.31648	-2.22446	2.40117e-13	6.10438e-11	down	yes
Zm00001d042214	6.8633	31.9692	-2.21971	2.97649e-30	3.60889e-27	down	yes
Zm00001d002521	21.0895	98.1043	-2.21779	5.09439e-15	1.67287e-12	down	yes
Zm00001d031745	0.421559	1.95117	-2.21053	0.000657193	0.0165079	down	yes
Zm00001d028093	15.0895	69.8108	-2.20991	2.55445e-13	6.39098e-11	down	yes
Zm00001d043932	19.9952	92.4118	-2.20842	8.96117e-08	8.43488e-06	down	yes
Zm00001d039037	31.9864	147.012	-2.20041	1.30597e-09	1.80567e-07	down	yes
Zm00001d007764	0.960418	4.37136	-2.18635	3.10323e-08	3.30494e-06	down	yes
Zm00001d051302	2.0346	9.17969	-2.1737	9.32638e-14	2.53453e-11	down	yes
Zm00001d012426	3.05586	13.7817	-2.1731	1.61869e-05	0.000787462	down	yes
Zm00001d017984	13.6897	61.5807	-2.16939	2.87789e-17	1.17822e-14	down	yes
Zm00001d051314	0.254665	1.14441	-2.16794	0.000621963	0.0158759	down	yes
Zm00001d038447	2.58351	11.6047	-2.1673	9.87209e-15	3.11208e-12	down	yes
Zm00001d036338	2.93112	13.1391	-2.16435	1.45269e-14	4.48967e-12	down	yes
Zm00001d020429	4.71746	21.1015	-2.16126	8.26322e-10	1.20041e-07	down	yes
Zm00001d022678	1.57291	7.033	-2.1607	3.10808e-14	8.98891e-12	down	yes
Zm00001d004443	9.88024	43.9826	-2.15431	1.02662e-07	9.41711e-06	down	yes
Zm00001d050308	0.150739	0.671014	-2.15429	0.000914924	0.0212023	down	yes
Zm00001d039600	0.370115	1.64276	-2.15008	9.80654e-06	0.000525751	down	yes
Zm00001d042115	3.9896	17.6931	-2.14887	1.31845e-09	1.81497e-07	down	yes
Zm00001d011451	1.1222	4.948	-2.14052	4.28103e-05	0.00183261	down	yes
Zm00001d009568	0.97611	4.26923	-2.12886	1.25192e-05	0.000640676	down	yes
Zm00001d028752	7.08318	30.843	-2.12248	3.19402e-12	6.80326e-10	down	yes
Zm00001d017968	2.04109	8.8531	-2.11684	0.000643919	0.0162261	down	yes
Zm00001d048226	3.54057	15.3556	-2.11671	2.71496e-09	3.51162e-07	down	yes
Zm00001d029028	31.6581	137.125	-2.11484	2.44837e-14	7.14653e-12	down	yes
Zm00001d004664	10.7081	46.2063	-2.10939	7.26939e-09	8.58279e-07	down	yes
Zm00001d009487	7.3405	31.614	-2.10662	2.06513e-18	9.7166e-16	down	yes
Zm00001d050514	3.30403	14.2016	-2.10375	1.87337e-07	1.63138e-05	down	yes
Zm00001d018473	0.940057	4.02667	-2.09877	0.000127067	0.00441807	down	yes
Zm00001d016379	25.6266	109.621	-2.09681	6.80304e-11	1.17835e-08	down	yes
Zm00001d015354	1.11885	4.77778	-2.09433	3.1832e-06	0.000198314	down	yes
Zm00001d010956	5.0777	21.6462	-2.09187	1.09116e-09	1.53561e-07	down	yes
Zm00001d028811	1.8309	7.80093	-2.09109	0.000719869	0.0177429	down	yes
Zm00001d040048	3.19762	13.5626	-2.08457	1.72773e-09	2.34762e-07	down	yes
Zm00001d026662	45.5822	193.271	-2.08408	9.92738e-26	8.45812e-23	down	yes
Zm00001d042108	11.0701	46.8541	-2.08151	4.33948e-10	6.67306e-08	down	yes
Zm00001d005951	33.5769	140.876	-2.06889	5.48105e-11	9.66453e-09	down	yes
Zm00001d027991	5.70084	23.8749	-2.06625	2.13891e-09	2.82121e-07	down	yes
Zm00001d011228	3.22389	13.5003	-2.06611	5.95976e-09	7.1165e-07	down	yes
Zm00001d052628	0.174294	0.72359	-2.05365	0.000273967	0.00835256	down	yes
Zm00001d006511	2.95224	12.2255	-2.05001	4.18852e-23	2.80934e-20	down	yes
Zm00001d025943	1.01267	4.18969	-2.04868	2.56118e-10	4.03692e-08	down	yes
Zm00001d018461	6.74737	27.9123	-2.0485	6.14266e-06	0.000348276	down	yes
Zm00001d017036	1.4664	6.06193	-2.0475	1.04484e-08	1.1848e-06	down	yes
Zm00001d033510	4.24076	17.5059	-2.04545	2.71658e-18	1.23242e-15	down	yes
Zm00001d036780	0.264584	1.08738	-2.03906	0.000192064	0.00625479	down	yes
Zm00001d022579	0.0394953	0.162158	-2.03764	0.0026884	0.0466806	down	yes
Zm00001d003742	6.58481	27.0262	-2.03714	2.24644e-07	1.91915e-05	down	yes
Zm00001d032102	6.16101	25.2474	-2.0349	3.75164e-05	0.00162902	down	yes
Zm00001d044518	1.01833	4.15876	-2.02994	8.84616e-08	8.37436e-06	down	yes
Zm00001d008296	0.215235	0.873364	-2.02067	0.00077641	0.0187122	down	yes
Zm00001d016438	5.80117	23.4554	-2.01551	1.99381e-11	3.7895e-09	down	yes
Zm00001d042313	2.89347	11.5826	-2.00108	8.67983e-10	1.25515e-07	down	yes

## Sheet: UP
Supplementary Table S6 DEGs regulated leaf angle in bhlh112 under IAA treatment group
gene_id	FPKM.b112_I	FPKM.b112_CK	log2(fc) (b112_I VS b112_CK)	pval (b112_I VS b112_CK)	qval (b112_I VS b112_CK)	regulation	significant
Zm00001d042143	2.79114	0	14.7686	3.86724e-11	7.04687e-09	up	yes
Zm00001d053094	1.48541	0	13.8586	5.0986e-09	6.20572e-07	up	yes
Zm00001d001600	1.36247	0	13.7339	8.03664e-05	0.00303773	up	yes
Zm00001d016671	1.17377	0	13.5189	1.88516e-07	1.63713e-05	up	yes
Zm00001d026336	0.969769	0	13.2434	1.83305e-09	2.45894e-07	up	yes
Zm00001d049213	0.797476	0	12.9612	2.36796e-07	1.9906e-05	up	yes
Zm00001d047778	0.744193	0	12.8615	0.00142097	0.0294111	up	yes
Zm00001d009826	0.664512	0	12.6981	0.000554466	0.0145295	up	yes
Zm00001d036889	0.462721	0	12.1759	2.17781e-08	2.40047e-06	up	yes
Zm00001d022192	0.447281	0	12.127	3.52652e-07	2.85051e-05	up	yes
Zm00001d008410	0.414791	0	12.0182	0.000106887	0.00382899	up	yes
Zm00001d043350	0.346173	0	11.7573	2.4732e-08	2.69776e-06	up	yes
Zm00001d023159	0.292484	0	11.5141	0.00138292	0.0288137	up	yes
Zm00001d011736	0.220872	0	11.109	2.59144e-05	0.00119259	up	yes
Zm00001d000761	0.220316	0	11.1054	0.000407115	0.0114691	up	yes
Zm00001d051548	0.139821	0	10.4494	0.000213508	0.00678491	up	yes
Zm00001d031510	0.1225	0	10.2586	0.00279195	0.0478335	up	yes
Zm00001d039314	0.12179	0	10.2502	0.000146702	0.00500502	up	yes
Zm00001d020418	0.11455	0	10.1618	0.00153025	0.0309824	up	yes
Zm00001d048861	0.109182	0	10.0925	0.00195668	0.0373154	up	yes
Zm00001d037081	0.0703727	0	9.45887	0.00204899	0.0384968	up	yes
Zm00001d004164	0.0680143	0	9.4097	0.000998505	0.0224674	up	yes
Zm00001d038314	0.0667797	0	9.38327	0.000217913	0.00689709	up	yes
Zm00001d022593	1.25833	0.00766	7.35995	3.42715e-07	2.78447e-05	up	yes
Zm00001d042934	1.07042	0.00833733	7.00438	2.33458e-05	0.00108708	up	yes
Zm00001d001299	2.80242	0.0256183	6.77335	8.37634e-05	0.00314727	up	yes
Zm00001d013617	2.98732	0.0416807	6.16333	2.4495e-06	0.000158638	up	yes
Zm00001d013616	2.97531	0.0426967	6.12277	4.41642e-06	0.000262685	up	yes
Zm00001d013629	1.72349	0.0299633	5.84599	0.000164688	0.00551128	up	yes
Zm00001d039538	0.493714	0.009284	5.73278	1.16479e-06	8.15977e-05	up	yes
Zm00001d018633	2.85816	0.0612837	5.54344	1.81758e-05	0.000872106	up	yes
Zm00001d016471	2.45077	0.063515	5.27	2.19582e-06	0.000144814	up	yes
Zm00001d018854	0.979735	0.030483	5.00632	9.91058e-10	1.41367e-07	up	yes
Zm00001d005038	0.48947	0.0167757	4.86678	0.00292131	0.0494262	up	yes
Zm00001d034322	0.342064	0.0117783	4.86006	0.00109487	0.0239851	up	yes
Zm00001d045056	0.520025	0.018592	4.80583	0.00254753	0.0450159	up	yes
Zm00001d033782	8.40855	0.304096	4.78926	7.86115e-07	5.76313e-05	up	yes
Zm00001d023617	0.879407	0.043926	4.32338	0.000191969	0.00625479	up	yes
Zm00001d034723	32.1893	1.61675	4.31542	5.34721e-06	0.000308866	up	yes
Zm00001d002707	1.11763	0.0571317	4.29001	0.000347298	0.0101466	up	yes
Zm00001d019116	1.19171	0.0634667	4.23089	0.00080062	0.0191459	up	yes
Zm00001d049744	1.17822	0.063908	4.20447	3.20686e-09	4.05996e-07	up	yes
Zm00001d031760	1.34708	0.0762737	4.1425	9.02044e-05	0.00333365	up	yes
Zm00001d022566	2.03002	0.121543	4.06196	0.000790679	0.0189835	up	yes
Zm00001d052793	1.23389	0.077762	3.988	0.00138012	0.0287743	up	yes
Zm00001d049529	1.20531	0.0775316	3.95848	0.000594569	0.0153759	up	yes
Zm00001d032969	92.7404	6.5952	3.81371	1.38567e-05	0.000696163	up	yes
Zm00001d037092	0.477569	0.0355244	3.74883	1.27051e-10	2.10798e-08	up	yes
Zm00001d038751	47.7847	3.57213	3.74169	5.47002e-05	0.00224235	up	yes
Zm00001d035080	35.8628	2.7385	3.71103	7.22198e-06	0.000399414	up	yes
Zm00001d037515	4.36188	0.355213	3.6182	3.80044e-09	4.75416e-07	up	yes
Zm00001d026432	2.91966	0.244627	3.57715	0.000112606	0.00399303	up	yes
Zm00001d034925	47.0714	3.99235	3.55954	1.01287e-06	7.24028e-05	up	yes
Zm00001d003015	12.1742	1.1011	3.46681	3.58672e-07	2.88438e-05	up	yes
Zm00001d016287	3.11272	0.285192	3.44817	6.42019e-06	0.000360767	up	yes
Zm00001d013907	445.414	40.9468	3.44332	0.000139242	0.00477334	up	yes
Zm00001d038049	159.147	14.9708	3.41014	1.12521e-06	7.91927e-05	up	yes
Zm00001d008837	4.49778	0.44551	3.33568	4.27476e-07	3.36054e-05	up	yes
Zm00001d026457	18.8502	1.91265	3.30093	3.13732e-17	1.26796e-14	up	yes
Zm00001d044340	3.63581	0.372845	3.28563	5.67855e-07	4.28255e-05	up	yes
Zm00001d048608	0.982616	0.101969	3.26849	0.00139457	0.0289989	up	yes
Zm00001d031158	11.3362	1.24246	3.18967	8.73972e-10	1.25804e-07	up	yes
Zm00001d043849	17.6445	1.96469	3.16684	3.54783e-05	0.00155768	up	yes
Zm00001d002496	11.4907	1.30154	3.14218	0.000447772	0.0123604	up	yes
Zm00001d038220	1.7877	0.203198	3.13714	0.000814084	0.0193247	up	yes
Zm00001d043393	4.36121	0.496272	3.13553	4.58191e-05	0.00193619	up	yes
Zm00001d002755	1.66276	0.190513	3.12561	2.68358e-05	0.0012314	up	yes
Zm00001d012594	5.9132	0.682748	3.11451	1.7755e-06	0.000119596	up	yes
Zm00001d020350	2.37218	0.274573	3.11096	3.76566e-05	0.00163285	up	yes
Zm00001d030976	4.50699	0.524798	3.10233	0.00104239	0.0231736	up	yes
Zm00001d011787	6.20377	0.733243	3.08078	0.000424013	0.0118184	up	yes
Zm00001d014914	94.7024	11.3828	3.05655	1.11737e-06	7.89778e-05	up	yes
Zm00001d009687	24.9949	3.02019	3.04892	1.01176e-08	1.15144e-06	up	yes
Zm00001d024265	16.8681	2.04148	3.0466	0.00166895	0.0330063	up	yes
Zm00001d044385	0.565107	0.068583	3.0426	0.000504873	0.0135683	up	yes
Zm00001d045055	35.3392	4.3083	3.03608	1.28481e-06	8.90159e-05	up	yes
Zm00001d015470	9.41666	1.14822	3.03582	0.000299647	0.00895824	up	yes
Zm00001d021695	4.32131	0.528992	3.03015	2.7171e-05	0.00124241	up	yes
Zm00001d025533	10.1808	1.26854	3.00461	2.77013e-06	0.000175001	up	yes
Zm00001d007201	8.59423	1.08272	2.98871	0.000732771	0.0179208	up	yes
Zm00001d045913	14.998	1.89405	2.98523	0.00052975	0.0140453	up	yes
Zm00001d022233	4.3238	0.546458	2.98412	0.00120802	0.0258697	up	yes
Zm00001d020852	7.94458	1.00684	2.98014	8.86117e-05	0.0032941	up	yes
Zm00001d040089	64.261	8.20623	2.96915	2.08467e-06	0.000137772	up	yes
Zm00001d032024	19.3477	2.47198	2.96842	4.73386e-15	1.57084e-12	up	yes
Zm00001d037229	8.37602	1.07866	2.95702	3.21296e-05	0.00143058	up	yes
Zm00001d016718	10.9297	1.40954	2.95496	0.000496938	0.0134493	up	yes
Zm00001d021288	41.3069	5.33996	2.95148	2.30735e-05	0.00107599	up	yes
Zm00001d019629	148.8	19.2837	2.94793	3.37422e-06	0.000208158	up	yes
Zm00001d035561	7.67903	0.999073	2.94226	3.37904e-18	1.50029e-15	up	yes
Zm00001d035246	34.3793	4.51975	2.92722	9.89834e-05	0.00359902	up	yes
Zm00001d045935	36.6159	4.85288	2.91556	5.48574e-06	0.000316147	up	yes
Zm00001d003247	14.6654	2.00131	2.8734	1.14904e-05	0.000593809	up	yes
Zm00001d031161	15.4221	2.14466	2.84617	0.00071555	0.0176918	up	yes
Zm00001d007180	1.22206	0.170976	2.83745	0.000866203	0.0202908	up	yes
Zm00001d048736	3.88767	0.546482	2.83066	0.000156102	0.00526868	up	yes
Zm00001d021047	1.46424	0.20641	2.82656	6.60824e-05	0.00261325	up	yes
Zm00001d022965	81.2733	11.5084	2.8201	1.68578e-05	0.000818837	up	yes
Zm00001d008528	5.13599	0.733928	2.80693	0.00122048	0.0260491	up	yes
Zm00001d029232	0.592168	0.0846603	2.80625	0.000627284	0.0159601	up	yes
Zm00001d030424	18.1126	2.61572	2.79172	7.47294e-07	5.50413e-05	up	yes
Zm00001d002626	2.76689	0.403392	2.77801	0.00208271	0.0389414	up	yes
Zm00001d020378	0.747045	0.109462	2.77077	3.27155e-06	0.000203016	up	yes
Zm00001d020953	3.79639	0.556433	2.77035	0.000645985	0.0162652	up	yes
Zm00001d003668	13.4994	1.98317	2.76701	0.0017531	0.0342408	up	yes
Zm00001d021073	10.6638	1.56661	2.767	8.95929e-05	0.00331883	up	yes
Zm00001d017785	12.2662	1.81187	2.75913	0.000151658	0.00513704	up	yes
Zm00001d006923	20.7223	3.06748	2.75605	4.42366e-35	8.71572e-32	up	yes
Zm00001d035178	6.24267	0.932043	2.7437	0.0010664	0.0235745	up	yes
Zm00001d018734	3.483	0.520528	2.74228	0.000484673	0.0132284	up	yes
Zm00001d048950	22.435	3.36042	2.73904	0.000479186	0.0131241	up	yes
Zm00001d049173	6.28057	0.94089	2.7388	1.52407e-05	0.000749527	up	yes
Zm00001d028999	21.5018	3.23655	2.73193	7.28283e-05	0.00281353	up	yes
Zm00001d035243	9.93578	1.49565	2.73186	2.14858e-05	0.00100791	up	yes
Zm00001d012091	43.9688	6.62051	2.73147	2.06101e-07	1.78003e-05	up	yes
Zm00001d042683	39.3341	5.94441	2.72618	1.46477e-05	0.000727174	up	yes
Zm00001d018089	13.7404	2.07912	2.72438	4.0327e-05	0.00174146	up	yes
Zm00001d008399	47.847	7.27731	2.71695	0.000162436	0.0054533	up	yes
Zm00001d032501	16.3442	2.49306	2.71279	0.000600756	0.0154977	up	yes
Zm00001d019461	0.554819	0.0848137	2.70965	1.20662e-06	8.41538e-05	up	yes
Zm00001d012785	3.4543	0.530247	2.70366	0.000198424	0.0064155	up	yes
Zm00001d046422	7.37477	1.138	2.6961	0.00127468	0.0269503	up	yes
Zm00001d014074	1.76095	0.271785	2.69582	4.28446e-05	0.00183261	up	yes
Zm00001d008968	1.73017	0.267788	2.69175	5.90704e-06	0.000336733	up	yes
Zm00001d039098	10.8608	1.68164	2.69118	0.000637179	0.0161207	up	yes
Zm00001d016814	1.90333	0.296195	2.6839	3.7557e-06	0.000228561	up	yes
Zm00001d033815	4.55286	0.711403	2.67803	3.46946e-11	6.39598e-09	up	yes
Zm00001d042633	3.39032	0.532237	2.67128	6.72752e-05	0.00265098	up	yes
Zm00001d027925	9.0886	1.43504	2.66297	7.97355e-06	0.000435629	up	yes
Zm00001d052495	0.350888	0.0561053	2.6448	4.53434e-05	0.00191867	up	yes
Zm00001d029716	17.4134	2.79809	2.63768	3.24286e-05	0.00143983	up	yes
Zm00001d013926	1.13466	0.183135	2.63129	0.00263434	0.0460082	up	yes
Zm00001d039634	1.59762	0.258091	2.62997	2.82153e-05	0.0012798	up	yes
Zm00001d013261	664.202	107.469	2.6277	6.2977e-06	0.000354515	up	yes
Zm00001d033585	14.2894	2.32489	2.61971	2.51007e-05	0.00115894	up	yes
Zm00001d020752	3.10841	0.508136	2.61289	0.000675049	0.0168835	up	yes
Zm00001d021459	174.104	28.5697	2.60739	0.000109926	0.00390678	up	yes
Zm00001d022303	0.64947	0.106711	2.60555	0.000483244	0.0132146	up	yes
Zm00001d030644	1.29383	0.212953	2.60305	0.000652971	0.016428	up	yes
Zm00001d023390	1.64017	0.270433	2.6005	0.000619689	0.0158435	up	yes
Zm00001d026042	11.1917	1.86757	2.5832	0.000275265	0.00838249	up	yes
Zm00001d020673	0.70814	0.118466	2.57956	0.00198581	0.0376206	up	yes
Zm00001d053554	1.84622	0.30924	2.57777	0.000407696	0.0114746	up	yes
Zm00001d044122	291.145	48.7711	2.57764	4.41159e-06	0.000262685	up	yes
Zm00001d029706	51.9966	8.74575	2.57176	0.000355682	0.0103151	up	yes
Zm00001d012420	0.69764	0.118501	2.55758	0.000987883	0.0222954	up	yes
Zm00001d013728	0.676908	0.116266	2.54153	0.00284193	0.0483742	up	yes
Zm00001d039139	2.08319	0.359715	2.53387	0.00285586	0.0485327	up	yes
Zm00001d038016	2.60091	0.449182	2.53365	0.000105428	0.00379398	up	yes
Zm00001d017455	9.24217	1.59755	2.53237	1.03224e-05	0.000545331	up	yes
Zm00001d021711	21.9676	3.80711	2.52861	3.01429e-05	0.0013536	up	yes
Zm00001d018709	10.4137	1.82875	2.50955	2.41604e-06	0.000157038	up	yes
Zm00001d003009	32.2211	5.67675	2.50487	2.5485e-07	2.13101e-05	up	yes
Zm00001d018926	48.4497	8.56738	2.49956	0.000852599	0.0200727	up	yes
Zm00001d049916	0.552015	0.0978415	2.49619	0.0025006	0.0443856	up	yes
Zm00001d011063	75.6735	13.4202	2.49539	6.98496e-05	0.00272517	up	yes
Zm00001d049096	4.08874	0.729119	2.48743	0.000801218	0.0191459	up	yes
Zm00001d021761	3.38089	0.604356	2.48393	0.00080442	0.0191819	up	yes
Zm00001d029696	44.5195	7.98859	2.47842	6.95155e-05	0.00272225	up	yes
Zm00001d029438	22.6568	4.06944	2.47704	3.959e-07	3.15161e-05	up	yes
Zm00001d033924	23.859	4.29511	2.47377	2.85005e-05	0.00129088	up	yes
Zm00001d053068	9.40768	1.69784	2.47014	6.922e-09	8.20335e-07	up	yes
Zm00001d025255	2.29183	0.413702	2.46984	0.00220533	0.0406316	up	yes
Zm00001d009557	4.97339	0.897772	2.46981	0.00035188	0.0102236	up	yes
Zm00001d022424	65.7649	11.8742	2.46949	0.000213114	0.00677923	up	yes
Zm00001d006774	12.4576	2.2709	2.45569	0.000925819	0.0213345	up	yes
Zm00001d047202	7.27838	1.34421	2.43686	5.02656e-05	0.0020902	up	yes
Zm00001d033699	9.92199	1.83357	2.43598	0.000806742	0.0192228	up	yes
Zm00001d052744	3.41801	0.634167	2.43022	0.000677589	0.0169258	up	yes
Zm00001d004614	28.1425	5.25273	2.42161	0.00117541	0.0253272	up	yes
Zm00001d007606	0.29376	0.055027	2.41643	0.00174007	0.0340785	up	yes
Zm00001d014790	149.129	27.9585	2.4152	0.000338483	0.0099444	up	yes
Zm00001d005158	21.8227	4.12829	2.40221	0.000545834	0.014363	up	yes
Zm00001d032662	0.322741	0.0613277	2.39577	0.00252742	0.0447107	up	yes
Zm00001d020351	5.1603	0.98373	2.39112	0.000195006	0.00633098	up	yes
Zm00001d038299	65.5601	12.5082	2.38995	3.45595e-05	0.00152158	up	yes
Zm00001d026513	2.41316	0.461254	2.38729	0.000988031	0.0222954	up	yes
Zm00001d042958	2.61057	0.500066	2.38417	0.00019874	0.00641913	up	yes
Zm00001d013238	0.60554	0.116282	2.38059	6.74564e-05	0.0026548	up	yes
Zm00001d013862	6.03979	1.16423	2.37512	0.00153396	0.0310224	up	yes
Zm00001d041672	10.5326	2.03109	2.37453	1.93555e-05	0.000921694	up	yes
Zm00001d008496	1.0379	0.200742	2.37025	0.000722636	0.0177729	up	yes
Zm00001d028720	14.0091	2.71272	2.36856	0.000401558	0.0113531	up	yes
Zm00001d009907	26.4339	5.15868	2.35731	0.00103444	0.0230295	up	yes
Zm00001d012477	3.30635	0.649063	2.34881	0.000400176	0.0113242	up	yes
Zm00001d043798	3.92559	0.775067	2.34052	0.000201886	0.00650372	up	yes
Zm00001d015670	7.42894	1.4669	2.34039	1.96401e-05	0.000932432	up	yes
Zm00001d034068	8.52786	1.69036	2.33485	0.000930494	0.0214109	up	yes
Zm00001d037426	6.32536	1.25429	2.33428	0.00160113	0.0319657	up	yes
Zm00001d048333	24.4974	4.86613	2.33178	0.000152542	0.0051596	up	yes
Zm00001d003091	9.1053	1.81002	2.3307	4.74493e-05	0.00198915	up	yes
Zm00001d039323	0.568548	0.113436	2.32541	0.00121576	0.0259834	up	yes
Zm00001d016616	2.16238	0.435436	2.31209	0.000108114	0.00385543	up	yes
Zm00001d022468	1.36516	0.275415	2.30939	1.81333e-07	1.58787e-05	up	yes
Zm00001d005439	2.75202	0.555224	2.30935	7.10369e-10	1.05135e-07	up	yes
Zm00001d037160	52.4175	10.6751	2.2958	0.000456568	0.0125647	up	yes
Zm00001d043019	39.5077	8.04729	2.29556	0.00163748	0.0325268	up	yes
Zm00001d017264	7.57729	1.54851	2.2908	0.00239781	0.0431646	up	yes
Zm00001d032081	21.7377	4.45552	2.28654	0.000418076	0.0116938	up	yes
Zm00001d052220	15.1562	3.10838	2.28568	0.00137781	0.0287454	up	yes
Zm00001d022154	28.1592	5.79599	2.28048	0.000559995	0.0146389	up	yes
Zm00001d008909	16.4464	3.38761	2.27944	0.00052776	0.0140126	up	yes
Zm00001d039310	21.6775	4.47076	2.27761	0.000178622	0.00589003	up	yes
Zm00001d039648	34.7716	7.19802	2.27224	1.17597e-08	1.32212e-06	up	yes
Zm00001d050266	5.01121	1.04917	2.25591	0.000314354	0.00931364	up	yes
Zm00001d044821	15.8542	3.3228	2.25439	0.00228706	0.0419171	up	yes
Zm00001d007274	171.034	35.9015	2.25217	6.69664e-07	5.01437e-05	up	yes
Zm00001d009797	8.89412	1.87733	2.24417	0.00062508	0.0159297	up	yes
Zm00001d045582	20.1343	4.25944	2.24092	0.0017903	0.0348379	up	yes
Zm00001d027656	45.7843	9.6931	2.23982	7.66134e-05	0.00292039	up	yes
Zm00001d005546	25.6252	5.43904	2.23614	5.70147e-05	0.00231317	up	yes
Zm00001d034414	100.854	21.457	2.23276	0.000850494	0.0200381	up	yes
Zm00001d039764	4.58575	0.976584	2.23134	3.45116e-05	0.00152158	up	yes
Zm00001d035605	765.129	163.043	2.23045	0.000294971	0.00885586	up	yes
Zm00001d043853	6.02052	1.28321	2.23013	0.00042965	0.0119649	up	yes
Zm00001d018762	0.710135	0.151475	2.22901	6.84413e-06	0.000381737	up	yes
Zm00001d033419	20.01	4.27401	2.22706	4.67485e-05	0.00197019	up	yes
Zm00001d028303	15.9568	3.41638	2.22363	0.00050646	0.0135772	up	yes
Zm00001d005148	14.3446	3.07313	2.22272	0.00181248	0.0351177	up	yes
Zm00001d053220	32.7708	7.03583	2.21962	1.78462e-06	0.000119954	up	yes
Zm00001d035604	46.3079	9.97501	2.21487	0.000164232	0.00550187	up	yes
Zm00001d014623	2.0122	0.43354	2.21453	0.000275481	0.00838249	up	yes
Zm00001d011006	5.99666	1.29441	2.21187	0.000444307	0.012297	up	yes
Zm00001d027846	47.3661	10.2527	2.20785	4.48434e-08	4.61975e-06	up	yes
Zm00001d044061	11.0957	2.40696	2.20472	1.07639e-07	9.80702e-06	up	yes
Zm00001d043864	3.20603	0.700071	2.19521	0.000402579	0.0113718	up	yes
Zm00001d044156	2.76083	0.607511	2.18412	0.00264188	0.0460888	up	yes
Zm00001d003016	18.4076	4.06663	2.1784	4.69005e-07	3.62376e-05	up	yes
Zm00001d028368	28.8097	6.37181	2.17678	2.22706e-05	0.00104163	up	yes
Zm00001d016160	1.80734	0.400314	2.17466	0.00084716	0.0199894	up	yes
Zm00001d015224	11.4856	2.54636	2.17332	0.000738422	0.018017	up	yes
Zm00001d023941	17.6802	3.925	2.17137	0.000310525	0.0092175	up	yes
Zm00001d004886	2.00975	0.447645	2.16659	0.00218085	0.0403932	up	yes
Zm00001d049016	202.871	45.2891	2.16333	1.28608e-07	1.15836e-05	up	yes
Zm00001d020280	4.38655	0.982273	2.15889	0.00119159	0.0256077	up	yes
Zm00001d045499	26.586	5.95895	2.15754	0.000209423	0.00667527	up	yes
Zm00001d016083	34.5392	7.74373	2.15713	1.74705e-06	0.000117932	up	yes
Zm00001d038131	0.517189	0.116073	2.15566	2.1291e-05	0.00100026	up	yes
Zm00001d007832	51.6573	11.6254	2.15169	0.00186134	0.0358661	up	yes
Zm00001d008866	2.02721	0.456262	2.15156	0.000723343	0.0177729	up	yes
Zm00001d013553	6.0937	1.37427	2.14866	0.000268136	0.0082145	up	yes
Zm00001d018502	3.20691	0.72452	2.14608	0.000923051	0.0213125	up	yes
Zm00001d008458	5.57215	1.25984	2.14499	0.00217749	0.0403546	up	yes
Zm00001d007831	79.3986	18.0445	2.13756	0.000899093	0.0209246	up	yes
Zm00001d007195	3.05567	0.695316	2.13575	5.98329e-05	0.00240583	up	yes
Zm00001d031221	11.5517	2.62873	2.13567	1.60856e-06	0.000109758	up	yes
Zm00001d004865	2.62391	0.597986	2.13353	0.00215625	0.0400551	up	yes
Zm00001d052059	1.9331	0.441837	2.12933	1.70101e-06	0.00011507	up	yes
Zm00001d005051	2.04713	0.468074	2.1288	0.000148288	0.00504821	up	yes
Zm00001d047418	29.8003	6.82467	2.1265	0.00104682	0.0232395	up	yes
Zm00001d053143	22.1996	5.10481	2.12061	0.000310076	0.00921285	up	yes
Zm00001d018150	16.2932	3.76168	2.11482	3.87131e-06	0.000235143	up	yes
Zm00001d028144	19.8404	4.58422	2.1137	0.000813219	0.0193232	up	yes
Zm00001d039392	6.06945	1.40525	2.11073	0.000830488	0.0196549	up	yes
Zm00001d047976	2.72796	0.632135	2.10952	1.61652e-06	0.000110015	up	yes
Zm00001d028689	28.5673	6.63407	2.1064	0.00239443	0.0431531	up	yes
Zm00001d035445	78.1734	18.1614	2.1058	0.000201978	0.00650372	up	yes
Zm00001d044662	26.2548	6.10048	2.10559	0.00248143	0.0442122	up	yes
Zm00001d052837	75.5263	17.6551	2.0969	8.66141e-05	0.00323894	up	yes
Zm00001d023803	7.44536	1.74074	2.09664	3.3442e-05	0.00147981	up	yes
Zm00001d017666	3.92852	0.921	2.09271	0.00206474	0.0386514	up	yes
Zm00001d004339	0.864536	0.202684	2.09269	7.79977e-05	0.00296241	up	yes
Zm00001d019457	14.4276	3.38622	2.09109	0.00188151	0.0361663	up	yes
Zm00001d024597	1.12145	0.264193	2.0857	0.000886784	0.0206768	up	yes
Zm00001d013571	22.4491	5.29585	2.08372	0.000345079	0.0100966	up	yes
Zm00001d041684	7.41547	1.75207	2.08148	0.00154494	0.0311598	up	yes
Zm00001d023294	6.94566	1.64367	2.07919	0.000454416	0.0125219	up	yes
Zm00001d001303	1.18443	0.280321	2.07904	0.000187664	0.00614323	up	yes
Zm00001d052433	16.9759	4.02492	2.07645	0.000488693	0.0133036	up	yes
Zm00001d046510	7.7619	1.84159	2.07546	2.64351e-07	2.18724e-05	up	yes
Zm00001d031426	0.765276	0.181921	2.07267	0.00252992	0.0447299	up	yes
Zm00001d051693	2.57722	0.614022	2.06945	0.00205058	0.0384968	up	yes
Zm00001d042376	0.90496	0.216204	2.06546	0.00116336	0.0251287	up	yes
Zm00001d044111	40.7737	9.78092	2.0596	0.0027661	0.0476235	up	yes
Zm00001d040468	82.3202	19.7485	2.0595	0.000995265	0.0224426	up	yes
Zm00001d034324	1.35909	0.32615	2.05903	0.00121773	0.0260079	up	yes
Zm00001d024268	59.1323	14.2139	2.05664	0.000106549	0.00382123	up	yes
Zm00001d036925	32.9566	7.94022	2.05332	0.000214788	0.00681185	up	yes
Zm00001d028389	2.2546	0.543404	2.05277	0.000719	0.0177353	up	yes
Zm00001d043839	4.86827	1.17369	2.05236	5.62693e-05	0.00229474	up	yes
Zm00001d037608	7.46548	1.80554	2.0478	0.000394231	0.0111861	up	yes
Zm00001d005692	4.16741	1.01594	2.03634	0.000945399	0.0216724	up	yes
Zm00001d027353	14.8868	3.65091	2.02771	0.000521778	0.0139041	up	yes
Zm00001d002974	11.4176	2.80266	2.02639	2.34533e-05	0.00109047	up	yes
Zm00001d044951	49.8264	12.2573	2.02327	0.00180169	0.0349733	up	yes
Zm00001d028260	39.326	9.67603	2.02299	0.000695052	0.0172765	up	yes
Zm00001d049503	14.636	3.60151	2.02285	5.14113e-05	0.0021241	up	yes
Zm00001d010137	28.61	7.06086	2.01861	2.12375e-05	0.000999241	up	yes
Zm00001d019527	0.624578	0.154678	2.01362	0.00233026	0.0424866	up	yes
Zm00001d038300	5.94017	1.47132	2.01339	0.00138426	0.0288225	up	yes
Zm00001d018580	1.38161	0.34279	2.01095	0.000219572	0.00694262	up	yes
Zm00001d014499	1.02924	0.255874	2.00807	0.000129549	0.00448781	up	yes
Zm00001d034069	15.4127	3.83758	2.00585	0.000350011	0.0101881	up	yes
Zm00001d052683	72.2431	18.043	2.00142	0.000251707	0.00781192	up	yes
