# Supplementary material for: Morphological characterization and transcriptome analysis of leaf angle mutant bhlh112 in maize [Zea mays L.]
Source: Front Plant Sci. 2022 Oct 7;13:995815. doi: 10.3389/fpls.2022.995815 (PMC9585351; doi:10.3389/fpls.2022.995815)
Supplement: Supplementary file 7 [file Table_7.xlsx]

## Sheet: DOWN
Supplementary Table S7 DEGs regulated leaf angle in B73 under IAA treatment group
gene_id	FPKM.WT_I	FPKM.WT_CK	log2(fc) (WT_I VS WT_CK)	pval (WT_I VS WT_CK)	qval (WT_I VS WT_CK)	regulation	significant
Zm00001d052827	0.942097	10.5126	-3.48011	6.36297e-43	1.03074e-38	down	yes
Zm00001d024478	0.122849	2.06826	-4.07346	8.21684e-20	1.47894e-16	down	yes
Zm00001d026859	7.18648	63.6029	-3.14574	1.38252e-18	2.23954e-15	down	yes
Zm00001d007750	2.4365	19.1601	-2.97522	2.95598e-14	1.99516e-11	down	yes
Zm00001d028471	22.1422	356.636	-4.00958	2.50351e-12	1.17549e-09	down	yes
Zm00001d038325	4.01695	26.6118	-2.7279	2.59463e-12	1.20087e-09	down	yes
Zm00001d003676	0	1.44796	-13.8217	1.75361e-11	6.3779e-09	down	yes
Zm00001d034732	0.636512	3.26733	-2.35985	3.42048e-11	1.11936e-08	down	yes
Zm00001d019400	2.15594	18.8855	-3.13089	6.43834e-11	1.76771e-08	down	yes
Zm00001d052786	0	2.77546	-14.7604	8.07639e-11	2.11015e-08	down	yes
Zm00001d052363	0.731544	4.65281	-2.66908	1.32568e-10	3.22927e-08	down	yes
Zm00001d045919	3.61529	17.1826	-2.24877	2.43542e-10	5.55654e-08	down	yes
Zm00001d004633	0.925739	7.24597	-2.9685	2.98996e-10	6.50125e-08	down	yes
Zm00001d050768	0.870865	6.4023	-2.87807	3.73233e-10	7.83156e-08	down	yes
Zm00001d043084	0	0.777979	-12.9255	1.33727e-09	2.24481e-07	down	yes
Zm00001d030557	0.70875	3.32298	-2.22913	2.15018e-09	3.3015e-07	down	yes
Zm00001d004929	0	0.301743	-11.5591	4.28846e-09	5.74122e-07	down	yes
Zm00001d045190	2.73863	19.0375	-2.79731	7.86292e-09	9.19187e-07	down	yes
Zm00001d022193	0	0.229414	-11.1637	1.05547e-08	1.17107e-06	down	yes
Zm00001d046723	1.69184	9.52137	-2.49258	1.07854e-08	1.18852e-06	down	yes
Zm00001d019450	0.203456	1.21541	-2.57866	1.2712e-08	1.36825e-06	down	yes
Zm00001d013630	0.691501	4.72257	-2.77177	1.62273e-08	1.67966e-06	down	yes
Zm00001d042371	24.4853	159.531	-2.70385	1.88975e-08	1.91925e-06	down	yes
Zm00001d023242	2.37395	10.614	-2.16061	1.9152e-08	1.92698e-06	down	yes
Zm00001d007792	0	0.309713	-11.5967	2.61685e-08	2.49355e-06	down	yes
Zm00001d032173	0.17169	0.923124	-2.42672	3.89051e-08	3.50426e-06	down	yes
Zm00001d010499	0.253725	3.17179	-3.64396	3.9155e-08	3.50426e-06	down	yes
Zm00001d012036	0.69806	14.3289	-4.35944	4.16656e-08	3.69831e-06	down	yes
Zm00001d050959	0.121083	0.745329	-2.62189	5.77988e-08	4.91487e-06	down	yes
Zm00001d043298	0.780286	3.55508	-2.18781	5.8626e-08	4.97216e-06	down	yes
Zm00001d015053	0.52384	4.46164	-3.09038	7.89319e-08	6.52356e-06	down	yes
Zm00001d042317	4.37359	20.6428	-2.23875	1.17818e-07	9.49517e-06	down	yes
Zm00001d006571	0.00580433	0.477383	-6.36187	1.33616e-07	1.06886e-05	down	yes
Zm00001d044798	0.168759	1.31527	-2.96232	1.47601e-07	1.16044e-05	down	yes
Zm00001d024676	9.04978	85.1586	-3.2342	1.98027e-07	1.51671e-05	down	yes
Zm00001d039826	5.58207	32.9097	-2.55964	2.91742e-07	2.16786e-05	down	yes
Zm00001d021901	3.8656	21.4706	-2.4736	5.44963e-07	3.87187e-05	down	yes
Zm00001d045026	3.77406	15.3417	-2.02327	1.06916e-06	7.21709e-05	down	yes
Zm00001d029913	2.22167	12.8918	-2.53674	1.43678e-06	9.40382e-05	down	yes
Zm00001d018455	0.434496	2.37953	-2.45326	1.66922e-06	0.000108593	down	yes
Zm00001d033698	0.405216	3.38734	-3.06339	1.73963e-06	0.000112947	down	yes
Zm00001d010845	0.830945	7.40986	-3.15662	2.62924e-06	0.000165082	down	yes
Zm00001d015213	1.17609	10.7438	-3.19143	2.78437e-06	0.000173144	down	yes
Zm00001d037418	0.105337	1.22041	-3.53429	3.17372e-06	0.000194739	down	yes
Zm00001d033020	0.760303	4.07382	-2.42174	4.70105e-06	0.000279458	down	yes
Zm00001d037474	0	0.740068	-12.8534	4.96373e-06	0.000292923	down	yes
Zm00001d030086	2.84701	15.8359	-2.47568	5.25984e-06	0.000309271	down	yes
Zm00001d007956	0.327974	2.33483	-2.83166	5.49296e-06	0.000321229	down	yes
Zm00001d012413	1.12401	4.76323	-2.08328	5.5073e-06	0.000321488	down	yes
Zm00001d006010	12.0316	54.6193	-2.18258	8.23573e-06	0.000458456	down	yes
Zm00001d037468	1.10326	4.4156	-2.00083	8.7919e-06	0.00048278	down	yes
Zm00001d037792	0.210775	1.6916	-3.00461	8.89425e-06	0.00048675	down	yes
Zm00001d048064	0.309896	5.27695	-4.08985	9.04336e-06	0.000494076	down	yes
Zm00001d043047	7.69069	49.1543	-2.67613	1.04953e-05	0.000558336	down	yes
Zm00001d021487	0.0641083	0.48115	-2.9079	1.19814e-05	0.00062207	down	yes
Zm00001d049059	102.787	476.189	-2.21188	1.21046e-05	0.000627465	down	yes
Zm00001d019399	1.26528	8.73665	-2.78762	1.27591e-05	0.000655101	down	yes
Zm00001d024023	0	0.872877	-13.0916	1.37818e-05	0.000699458	down	yes
Zm00001d004624	2.14191	9.32724	-2.12255	1.37957e-05	0.000699458	down	yes
Zm00001d020362	1.19968	5.85522	-2.28708	1.71777e-05	0.000836876	down	yes
Zm00001d054055	0	0.307737	-11.5875	1.79711e-05	0.000874217	down	yes
Zm00001d002198	0.213248	0.90158	-2.07992	1.85985e-05	0.000897993	down	yes
Zm00001d029506	4.24701	19.9806	-2.23408	4.3481e-05	0.00188581	down	yes
Zm00001d003434	1.66788	9.24449	-2.47058	4.41709e-05	0.00190524	down	yes
Zm00001d011123	0.24678	2.96055	-3.58457	4.89098e-05	0.00205256	down	yes
Zm00001d023124	0.0315827	1.24616	-5.30222	5.70718e-05	0.00233167	down	yes
Zm00001d021135	1.08937	5.3026	-2.28321	5.91834e-05	0.00240006	down	yes
Zm00001d015779	0.216327	0.90408	-2.06323	5.97396e-05	0.00241628	down	yes
Zm00001d048875	0.033656	0.547689	-4.02442	7.37126e-05	0.00289121	down	yes
Zm00001d029101	0.735227	4.43458	-2.59254	7.45022e-05	0.00291711	down	yes
Zm00001d029711	0.21665	1.92376	-3.15049	7.49598e-05	0.00292244	down	yes
Zm00001d024291	17.3567	90.2168	-2.3779	7.76662e-05	0.00300266	down	yes
Zm00001d012383	0.0344357	0.335588	-3.28472	8.25598e-05	0.00315793	down	yes
Zm00001d036900	0.0236217	0.440423	-4.22071	8.90592e-05	0.00336679	down	yes
Zm00001d013610	0.323528	4.32952	-3.74224	9.13291e-05	0.00343656	down	yes
Zm00001d033710	0	0.448625	-12.1313	9.36921e-05	0.00350917	down	yes
Zm00001d005919	0	0.366933	-11.8413	9.90465e-05	0.00366314	down	yes
Zm00001d039993	6.23119	40.3287	-2.69423	9.98177e-05	0.00368325	down	yes
Zm00001d017466	1.12345	6.39978	-2.51009	0.000111022	0.00402336	down	yes
Zm00001d033471	0.423793	2.43642	-2.52333	0.000119492	0.0042824	down	yes
Zm00001d018619	0.341634	2.06986	-2.59901	0.000122268	0.00437706	down	yes
Zm00001d000930	2.48899	15.7266	-2.65958	0.000127762	0.00452869	down	yes
Zm00001d010434	0.421789	2.5134	-2.57504	0.000137653	0.00480855	down	yes
Zm00001d030555	0.322293	1.91675	-2.57222	0.000148713	0.00510921	down	yes
Zm00001d035079	7.44406	37.3777	-2.32802	0.000158715	0.0054013	down	yes
Zm00001d050016	0.0931737	3.68186	-5.30437	0.000171848	0.00578746	down	yes
Zm00001d010321	1.09211	7.39321	-2.75909	0.000174284	0.00585124	down	yes
Zm00001d053394	32.2041	131.146	-2.02586	0.000181182	0.00602663	down	yes
Zm00001d051088	20.035	114.656	-2.51672	0.000185088	0.00610998	down	yes
Zm00001d052906	0.061398	0.750329	-3.61126	0.000187363	0.0061689	down	yes
Zm00001d024930	0	0.263426	-11.3632	0.000196205	0.00642605	down	yes
Zm00001d047458	0.336361	1.52429	-2.18005	0.000197726	0.00645759	down	yes
Zm00001d048016	0	0.137777	-10.4281	0.00024139	0.00760438	down	yes
Zm00001d011515	0.677887	31.0519	-5.51749	0.000263008	0.00816965	down	yes
Zm00001d015718	0.0528177	1.3849	-4.71261	0.000263458	0.00817579	down	yes
Zm00001d047087	7.07144	32.78	-2.21274	0.000290422	0.00880176	down	yes
Zm00001d039634	0.218597	1.58725	-2.86018	0.000294023	0.00889426	down	yes
Zm00001d009736	0.32939	2.58133	-2.97025	0.000297245	0.00895828	down	yes
Zm00001d052335	2.35954	11.6862	-2.30822	0.000324734	0.00959045	down	yes
Zm00001d043968	0.527137	5.96787	-3.50097	0.000329556	0.00968494	down	yes
Zm00001d044010	0.484901	2.57682	-2.40983	0.000344054	0.010033	down	yes
Zm00001d006776	0.450235	3.26778	-2.85956	0.00038024	0.0108633	down	yes
Zm00001d044372	0.00953933	0.474496	-5.63636	0.00039338	0.0111796	down	yes
Zm00001d020279	0	0.145986	-10.5116	0.00041394	0.0116921	down	yes
Zm00001d025737	0	0.506037	-12.305	0.000418401	0.0117668	down	yes
Zm00001d016121	1.1916	7.45972	-2.64622	0.000425665	0.0119297	down	yes
Zm00001d025234	0	0.14536	-10.5054	0.000428699	0.0119674	down	yes
Zm00001d015877	10.0868	47.4035	-2.23253	0.000430733	0.0120094	down	yes
Zm00001d004486	0.126893	0.643531	-2.34239	0.000434992	0.012086	down	yes
Zm00001d012403	5.45689	28.0799	-2.36339	0.000436404	0.0120946	down	yes
Zm00001d038703	0.136825	1.84384	-3.75231	0.000462355	0.0126111	down	yes
Zm00001d031781	0.902672	4.45199	-2.30218	0.000479188	0.0129805	down	yes
Zm00001d000507	0.241165	1.0036	-2.05708	0.000484099	0.0130917	down	yes
ENSRNA049997133	3.74909	18.1358	-2.27423	0.000497513	0.0133985	down	yes
Zm00001d047358	0.0113567	0.84557	-6.21831	0.000582355	0.0152979	down	yes
Zm00001d001906	0.0160362	0.347229	-4.43648	0.000597215	0.0156163	down	yes
Zm00001d027824	0.403759	1.83258	-2.18231	0.000601755	0.015697	down	yes
Zm00001d044930	0.0124447	1.0064	-6.33753	0.000611476	0.0159121	down	yes
Zm00001d024962	0.659976	3.49876	-2.40636	0.000665585	0.0170869	down	yes
Zm00001d052463	0	0.133407	-10.3816	0.000684044	0.0174914	down	yes
Zm00001d048063	0.801698	5.67203	-2.82273	0.000724471	0.0183945	down	yes
Zm00001d051094	12.1627	65.6923	-2.43326	0.000743057	0.018765	down	yes
Zm00001d044762	0.104529	1.95282	-4.22358	0.000809526	0.0200735	down	yes
Zm00001d051472	0.322119	1.35776	-2.07557	0.000811643	0.0201037	down	yes
Zm00001d001865	1.14873	5.18532	-2.17439	0.000827383	0.0204155	down	yes
Zm00001d009814	3.04436	16.7428	-2.45932	0.000874101	0.0212446	down	yes
Zm00001d004886	0.730554	4.20306	-2.52438	0.000880851	0.0213606	down	yes
Zm00001d001353	0.0192207	0.582207	-4.9208	0.000932578	0.0223923	down	yes
Zm00001d011548	0	0.381412	-11.8971	0.000974933	0.0232249	down	yes
Zm00001d036261	0.417924	1.90601	-2.18924	0.00097912	0.0232904	down	yes
Zm00001d026883	0.129264	1.56073	-3.59382	0.00102964	0.0242958	down	yes
Zm00001d006172	0	0.113494	-10.1484	0.00104234	0.0244532	down	yes
Zm00001d004072	0.353197	1.7705	-2.32561	0.0011428	0.0264811	down	yes
Zm00001d047090	11.8764	54.0464	-2.1861	0.00116813	0.0269169	down	yes
Zm00001d020705	2.98403	12.5939	-2.07739	0.00117131	0.0269518	down	yes
Zm00001d031395	0.688103	3.27618	-2.25132	0.0012709	0.028713	down	yes
Zm00001d003938	0.0653393	1.42551	-4.44738	0.00131079	0.0294472	down	yes
Zm00001d038950	3.25976	21.9789	-2.75328	0.00131189	0.0294472	down	yes
Zm00001d052651	9.47114	50.4217	-2.41244	0.00131487	0.0294764	down	yes
Zm00001d012780	0.0475133	0.685102	-3.84991	0.00139581	0.0308048	down	yes
Zm00001d029899	3.50868	19.5953	-2.48151	0.00140464	0.0309122	down	yes
Zm00001d002182	0.225078	1.15718	-2.36212	0.00143574	0.0314717	down	yes
Zm00001d032356	0.16819	0.927511	-2.46328	0.00148103	0.0322049	down	yes
Zm00001d031372	0.249871	1.32908	-2.41117	0.00148264	0.0322162	down	yes
Zm00001d002161	1.67501	10.5106	-2.6496	0.00150628	0.0326862	down	yes
Zm00001d047664	0.165398	1.08499	-2.71367	0.00152292	0.0329589	down	yes
Zm00001d044039	0.030497	0.899704	-4.88271	0.00153788	0.0331941	down	yes
Zm00001d024071	0.751768	4.17131	-2.47214	0.00176247	0.0372232	down	yes
Zm00001d000825	0	1.05957	-13.3712	0.00181825	0.0381774	down	yes
Zm00001d049204	0.657885	3.74437	-2.50882	0.00181996	0.0381885	down	yes
Zm00001d017033	23.438	139.221	-2.57046	0.00186383	0.0387575	down	yes
Zm00001d048020	0.281907	3.17453	-3.49325	0.0018979	0.0392395	down	yes
Zm00001d045283	0	0.18717	-10.8701	0.00194754	0.0400867	down	yes
Zm00001d024481	0.0179226	0.220208	-3.61902	0.00198778	0.0406811	down	yes
Zm00001d002167	0.0102135	0.22867	-4.48471	0.00201599	0.0411039	down	yes
Zm00001d030121	0.0454983	0.361061	-2.98836	0.0020527	0.0416688	down	yes
Zm00001d044526	0.699281	4.10849	-2.55466	0.00211719	0.0428169	down	yes
Zm00001d037397	0.211609	1.46908	-2.79544	0.00211966	0.0428246	down	yes
Zm00001d002620	0.319163	2.50822	-2.9743	0.00221384	0.0440024	down	yes
Zm00001d042867	3.27315	21.2415	-2.69813	0.00223209	0.0442566	down	yes
Zm00001d004649	0	0.0820877	-9.68102	0.00230885	0.045297	down	yes
Zm00001d009945	0.551003	3.17484	-2.52655	0.00231526	0.0453231	down	yes
Zm00001d002970	0.944381	5.31597	-2.49289	0.00233846	0.0457219	down	yes
Zm00001d026591	0.0446953	0.394532	-3.14195	0.00260915	0.0494334	down	yes
Zm00001d047907	0.137381	1.40534	-3.35466	0.00261658	0.0495163	down	yes

## Sheet: UP
Supplementary Table S7 DEGs regulated leaf angle in B73 under IAA treatment group
gene_id	FPKM.WT_I	FPKM.WT_CK	log2(fc) (WT_I VS WT_CK)	pval (WT_I VS WT_CK)	qval (WT_I VS WT_CK)	regulation	significant
Zm00001d007345	316.076	27.7646	3.50896	4.43365e-45	1.43642e-40	up	yes
Zm00001d046642	51.2153	5.14201	3.31617	2.3891e-42	2.58007e-38	up	yes
Zm00001d008622	85.3223	16.7457	2.34914	3.88369e-33	3.14559e-29	up	yes
Zm00001d019994	26.7972	3.00739	3.1555	3.08609e-32	1.99966e-28	up	yes
Zm00001d017418	343.617	30.3132	3.50278	8.81853e-29	4.08147e-25	up	yes
Zm00001d016715	6.92943	0.0474507	7.19016	2.85834e-28	1.15756e-24	up	yes
Zm00001d028160	14.0851	1.13759	3.63012	5.1055e-24	1.83787e-20	up	yes
Zm00001d007935	19.6825	0.66488	4.88768	1.36158e-23	4.41124e-20	up	yes
Zm00001d026130	2.44594	0.0645458	5.24392	4.91308e-23	1.44704e-19	up	yes
Zm00001d013263	40.863	7.41115	2.46302	2.64319e-21	7.13619e-18	up	yes
Zm00001d043523	13.0049	0.168768	6.26787	3.12154e-21	7.77935e-18	up	yes
Zm00001d021469	0.949142	0.115522	3.03845	1.13796e-20	2.45785e-17	up	yes
Zm00001d008623	34.8357	6.13024	2.50655	3.00258e-20	6.07985e-17	up	yes
Zm00001d014487	29.0196	4.71257	2.62244	1.45584e-19	2.48243e-16	up	yes
Zm00001d003865	75.9265	7.0083	3.43747	7.86314e-18	1.15795e-14	up	yes
Zm00001d041518	27.5443	5.01396	2.45773	1.11511e-17	1.57076e-14	up	yes
Zm00001d044686	3268.93	685.358	2.25389	1.25713e-17	1.69701e-14	up	yes
Zm00001d012535	9.12774	0.801303	3.50984	5.42658e-17	7.03241e-14	up	yes
Zm00001d023009	5.3025	1.13839	2.21968	6.1092e-17	7.61253e-14	up	yes
Zm00001d006778	24.401	4.07425	2.58233	1.26706e-16	1.52038e-13	up	yes
Zm00001d006779	22.1033	3.16431	2.8043	1.43517e-16	1.6606e-13	up	yes
Zm00001d014459	7.56735	0.38407	4.30035	2.58872e-16	2.73218e-13	up	yes
Zm00001d053011	1.95721	0.377181	2.37547	2.61428e-16	2.73218e-13	up	yes
Zm00001d029816	9.23952	1.213	2.92924	2.86358e-16	2.89919e-13	up	yes
Zm00001d006180	1.61027	0.165939	3.27858	4.56584e-16	4.35071e-13	up	yes
Zm00001d010201	24.2099	4.06016	2.57599	6.5101e-16	6.02612e-13	up	yes
Zm00001d002772	21.1908	1.03182	4.36018	1.78545e-15	1.52224e-12	up	yes
Zm00001d013561	1.04529	0.005873	7.47558	2.16038e-15	1.79467e-12	up	yes
Zm00001d052268	68.1011	14.676	2.21422	3.5066e-15	2.84017e-12	up	yes
Zm00001d019120	20.3886	4.16973	2.28973	8.29957e-15	6.25324e-12	up	yes
Zm00001d035300	5.3541	0.451562	3.56765	1.03288e-14	7.6053e-12	up	yes
Zm00001d019100	141.993	12.0527	3.5584	1.69256e-14	1.21857e-11	up	yes
Zm00001d032972	3.34483	0	15.0296	2.3763e-14	1.67167e-11	up	yes
Zm00001d019122	21.7409	4.5635	2.2522	2.4251e-14	1.67167e-11	up	yes
Zm00001d007160	1.91536	0	14.2253	3.15797e-14	2.088e-11	up	yes
Zm00001d021481	2.97115	0.272493	3.44673	4.05799e-14	2.57786e-11	up	yes
Zm00001d024946	12.0659	1.00874	3.58031	8.65513e-14	5.19276e-11	up	yes
Zm00001d010832	7.97638	0.320451	4.63756	9.86399e-14	5.81043e-11	up	yes
Zm00001d014315	85.3163	7.12604	3.58165	1.45165e-13	8.39831e-11	up	yes
Zm00001d002590	25.6455	1.85387	3.79009	1.91253e-13	1.08706e-10	up	yes
Zm00001d049258	6.43677	1.50214	2.09932	2.49696e-13	1.39477e-10	up	yes
Zm00001d040423	7.48387	0.873974	3.09812	3.28638e-13	1.80272e-10	up	yes
Zm00001d018181	65.9599	6.48348	3.34675	3.39267e-13	1.80272e-10	up	yes
Zm00001d003668	12.5764	1.94376	2.6938	3.39423e-13	1.80272e-10	up	yes
Zm00001d041055	2.57729	0.178548	3.85148	3.75572e-13	1.96255e-10	up	yes
Zm00001d025803	11.1069	1.26136	3.13841	7.71473e-13	3.90534e-10	up	yes
Zm00001d036834	4.89328	0.789521	2.63175	7.93541e-13	3.95525e-10	up	yes
Zm00001d024199	5.68526	1.1901	2.25614	9.00773e-13	4.4217e-10	up	yes
Zm00001d012408	5.0329	0.578062	3.1221	2.0013e-12	9.53503e-10	up	yes
Zm00001d053139	3.33496	0.239433	3.79997	4.68809e-12	2.08423e-09	up	yes
Zm00001d006343	2.48768	0.28649	3.11825	4.69625e-12	2.08423e-09	up	yes
Zm00001d039004	4.70721	0.409489	3.52298	5.53061e-12	2.42136e-09	up	yes
Zm00001d018475	19.1664	3.85071	2.31538	6.31713e-12	2.72883e-09	up	yes
Zm00001d021599	3.62632	0.37291	3.28161	8.88812e-12	3.73971e-09	up	yes
Zm00001d031275	51.7014	3.5576	3.86123	9.16712e-12	3.80764e-09	up	yes
Zm00001d027599	29.8711	6.50683	2.19872	9.42554e-12	3.86542e-09	up	yes
Zm00001d018184	176.889	18.8589	3.22953	1.03094e-11	4.15111e-09	up	yes
Zm00001d038613	3.61555	0.860612	2.07078	1.03784e-11	4.15111e-09	up	yes
Zm00001d021731	27.9124	4.09359	2.76947	1.26979e-11	4.95646e-09	up	yes
Zm00001d015307	3.70483	0.203154	4.18876	1.39682e-11	5.38738e-09	up	yes
Zm00001d018795	46.4871	11.2294	2.04956	1.49061e-11	5.68151e-09	up	yes
Zm00001d040674	1.21673	0	13.5707	1.65055e-11	6.21795e-09	up	yes
Zm00001d040149	0.923209	0	13.1724	1.77175e-11	6.3779e-09	up	yes
Zm00001d048945	33.6478	4.451	2.91831	2.28386e-11	8.00631e-09	up	yes
Zm00001d009843	0.936725	0	13.1934	2.30627e-11	8.00631e-09	up	yes
Zm00001d009025	2.30051	0.46981	2.2918	2.32296e-11	8.00631e-09	up	yes
Zm00001d048968	1.23607	0.115809	3.41594	2.39914e-11	8.18181e-09	up	yes
Zm00001d004555	6.067	0.373346	4.0224	3.05425e-11	1.03075e-08	up	yes
Zm00001d052397	16.9431	1.98823	3.09114	3.10227e-11	1.03616e-08	up	yes
Zm00001d035444	6.23558	0	15.9282	3.79502e-11	1.21734e-08	up	yes
Zm00001d054073	0.21045	0	11.0393	4.39835e-11	1.38347e-08	up	yes
Zm00001d043341	0.580335	0	12.5027	4.57732e-11	1.41234e-08	up	yes
Zm00001d050937	1.06737	0	13.3818	4.57732e-11	1.41234e-08	up	yes
Zm00001d019793	1.97018	0	14.266	4.76488e-11	1.41626e-08	up	yes
Zm00001d005337	1.20594	0	13.5579	4.76488e-11	1.41626e-08	up	yes
Zm00001d021660	0.186247	0	10.863	4.76488e-11	1.41626e-08	up	yes
Zm00001d007335	2.07889	0	14.3435	4.76488e-11	1.41626e-08	up	yes
Zm00001d027738	0.624736	0	12.609	4.96339e-11	1.44868e-08	up	yes
Zm00001d010174	2.01841	0.270838	2.89771	5.08934e-11	1.47218e-08	up	yes
Zm00001d013894	0.319889	0	11.6434	5.17694e-11	1.48427e-08	up	yes
Zm00001d013733	0.337628	0	11.7212	5.59662e-11	1.59052e-08	up	yes
Zm00001d003751	192.978	30.8761	2.64388	5.86616e-11	1.64892e-08	up	yes
Zm00001d037921	0.639438	0	12.6426	6.37357e-11	1.76488e-08	up	yes
Zm00001d001960	589.219	102.887	2.51774	6.74307e-11	1.83582e-08	up	yes
Zm00001d026376	0.622163	0	12.6031	6.93261e-11	1.87169e-08	up	yes
Zm00001d049161	112.45	4.97547	4.49831	7.79973e-11	2.05444e-08	up	yes
Zm00001d013718	0.469842	0	12.198	8.23706e-11	2.13491e-08	up	yes
Zm00001d049288	1.33237	0	13.7017	8.60949e-11	2.21373e-08	up	yes
Zm00001d023924	24.1944	0	17.8843	8.71923e-11	2.2243e-08	up	yes
Zm00001d028839	2.28104	0	14.4774	9.36174e-11	2.35117e-08	up	yes
Zm00001d034116	1.0453	0	13.3516	9.36174e-11	2.35117e-08	up	yes
Zm00001d043260	3.8277	0	15.2242	9.79449e-11	2.4223e-08	up	yes
Zm00001d019176	0.529928	0	12.3716	9.79449e-11	2.4223e-08	up	yes
Zm00001d017209	11.0382	2.33546	2.24073	1.09322e-10	2.68319e-08	up	yes
Zm00001d021879	6.02953	1.46784	2.03835	1.35868e-10	3.26772e-08	up	yes
Zm00001d040126	5.86008	0.625488	3.22787	1.4015e-10	3.33865e-08	up	yes
Zm00001d035807	0.740497	0	12.8543	1.52959e-10	3.57747e-08	up	yes
Zm00001d033400	1.07138	0	13.3872	1.52959e-10	3.57747e-08	up	yes
Zm00001d015538	1.15168	0	13.4915	1.53487e-10	3.57747e-08	up	yes
Zm00001d006088	0.727769	0	12.8293	1.75999e-10	4.07286e-08	up	yes
Zm00001d040952	3.87816	0	15.2431	1.94842e-10	4.47695e-08	up	yes
Zm00001d021016	11.5535	2.13979	2.43279	2.56286e-10	5.76608e-08	up	yes
Zm00001d031619	14.1965	1.97958	2.84226	2.70064e-10	6.03415e-08	up	yes
Zm00001d010510	5.04635	0	15.623	2.76617e-10	6.13825e-08	up	yes
Zm00001d049912	0.386814	0	11.9174	2.90335e-10	6.35558e-08	up	yes
Zm00001d028001	0.780166	0	12.9296	2.90335e-10	6.35558e-08	up	yes
Zm00001d030693	0.48758	0	12.2514	3.07258e-10	6.59241e-08	up	yes
Zm00001d009524	0.371456	0	11.859	3.07258e-10	6.59241e-08	up	yes
Zm00001d025316	1.42041	0	13.794	3.5944e-10	7.61121e-08	up	yes
Zm00001d029316	2.39085	0	14.5452	3.74681e-10	7.83156e-08	up	yes
Zm00001d033566	0.554188	0	12.4362	4.03636e-10	8.34754e-08	up	yes
Zm00001d026636	7.90108	1.0889	2.85918	4.10311e-10	8.41346e-08	up	yes
Zm00001d042779	0.997275	0	13.2838	4.13069e-10	8.41673e-08	up	yes
Zm00001d012262	0.355326	0	11.7949	4.48477e-10	9.08109e-08	up	yes
Zm00001d019792	1.40252	0	13.7757	4.71943e-10	9.43828e-08	up	yes
Zm00001d007131	0.688045	0	12.7483	4.71943e-10	9.43828e-08	up	yes
Zm00001d051008	0.371382	0	11.8587	4.91158e-10	9.58586e-08	up	yes
Zm00001d028732	0.54402	0	12.4094	4.91158e-10	9.58586e-08	up	yes
Zm00001d004230	0.0770682	0	9.58999	4.91158e-10	9.58586e-08	up	yes
Zm00001d009180	3.65529	0	15.1577	5.09745e-10	9.88905e-08	up	yes
Zm00001d023007	1.86384	0.268919	2.79303	5.13903e-10	9.91038e-08	up	yes
Zm00001d049104	1.15238	0	13.4923	5.55387e-10	1.0647e-07	up	yes
Zm00001d027539	5.04317	0.632448	2.99531	5.65283e-10	1.0773e-07	up	yes
Zm00001d020238	1.94633	0.177166	3.45759	5.77208e-10	1.09359e-07	up	yes
Zm00001d028303	3.01385	0.598248	2.33279	6.00398e-10	1.13091e-07	up	yes
Zm00001d008083	1.65216	0	14.0121	6.55784e-10	1.2281e-07	up	yes
Zm00001d006638	1.74533	0.295812	2.56075	6.79419e-10	1.26505e-07	up	yes
Zm00001d039726	45.4312	11.3557	2.00027	7.639e-10	1.41422e-07	up	yes
Zm00001d035413	1.69625	0	14.0501	8.19953e-10	1.50788e-07	up	yes
Zm00001d028434	1.14236	0	13.4797	8.23801e-10	1.50788e-07	up	yes
Zm00001d038751	21.4132	3.13797	2.7706	8.43741e-10	1.5357e-07	up	yes
Zm00001d027919	2.10093	0	14.3587	8.60799e-10	1.558e-07	up	yes
Zm00001d003090	2.48868	0	14.6031	8.72127e-10	1.56954e-07	up	yes
Zm00001d028525	0.119665	0	10.2248	8.76866e-10	1.56954e-07	up	yes
Zm00001d008583	0.363627	0	11.8282	8.87687e-10	1.58018e-07	up	yes
Zm00001d051801	1.78692	0	14.1252	8.93956e-10	1.58264e-07	up	yes
Zm00001d039559	0.836616	0	13.0303	9.25593e-10	1.62094e-07	up	yes
Zm00001d008773	1.59391	0	13.9603	9.39316e-10	1.63613e-07	up	yes
Zm00001d026576	7.60408	0.65535	3.53644	1.08087e-09	1.87263e-07	up	yes
Zm00001d044132	1.15682	0.122589	3.23827	1.13471e-09	1.95544e-07	up	yes
Zm00001d044846	0.638401	0	12.6402	1.17533e-09	2.01472e-07	up	yes
Zm00001d040852	2.89806	0	14.8228	1.1984e-09	2.04346e-07	up	yes
Zm00001d048408	0.316999	0	11.6303	1.31833e-09	2.2362e-07	up	yes
Zm00001d035703	0.54014	0	12.3991	1.40507e-09	2.34647e-07	up	yes
Zm00001d004758	94.8663	20.3123	2.22354	1.43008e-09	2.37598e-07	up	yes
Zm00001d017254	0.494664	0	12.2722	1.49306e-09	2.46797e-07	up	yes
Zm00001d035621	2.14634	0	14.3896	1.54134e-09	2.53485e-07	up	yes
Zm00001d016533	1.2008	0	13.5517	1.55927e-09	2.55138e-07	up	yes
Zm00001d013713	2.05962	0	14.3301	1.57634e-09	2.56634e-07	up	yes
Zm00001d004950	0.357679	0	11.8045	1.59054e-09	2.57651e-07	up	yes
Zm00001d031037	4.63066	0	15.4989	1.62432e-09	2.61815e-07	up	yes
Zm00001d000677	2.39215	0	14.546	1.69641e-09	2.72081e-07	up	yes
Zm00001d033595	8.62685	1.61886	2.41386	1.74482e-09	2.78467e-07	up	yes
Zm00001d042898	5.96457	0.850747	2.80962	1.79548e-09	2.85147e-07	up	yes
Zm00001d049250	2.21563	0	14.4354	2.00925e-09	3.15998e-07	up	yes
Zm00001d052507	1.98709	0	14.2784	2.04742e-09	3.18478e-07	up	yes
Zm00001d051713	2.91468	0	14.831	2.05294e-09	3.18478e-07	up	yes
Zm00001d020059	1.20043	0	13.5513	2.06433e-09	3.18478e-07	up	yes
Zm00001d024803	0.981743	0	13.2611	2.06433e-09	3.18478e-07	up	yes
Zm00001d050378	0.524749	0	12.3574	2.29265e-09	3.48176e-07	up	yes
Zm00001d025371	1.90835	0	14.22	2.41409e-09	3.63775e-07	up	yes
Zm00001d016796	0.231383	0	11.1761	2.46701e-09	3.68323e-07	up	yes
Zm00001d050640	0.259761	0	11.343	2.46701e-09	3.68323e-07	up	yes
Zm00001d050770	2.36665	0	14.5306	2.5466e-09	3.78462e-07	up	yes
Zm00001d051788	1.16046	0.11403	3.34721	2.56365e-09	3.79256e-07	up	yes
Zm00001d050344	0.566293	0	12.4673	2.60516e-09	3.83645e-07	up	yes
Zm00001d039831	1.00622	0	13.2967	2.68658e-09	3.93845e-07	up	yes
Zm00001d041538	6.36158	1.21123	2.39291	2.7375e-09	3.99502e-07	up	yes
Zm00001d015278	1.25411	0	13.6144	2.78294e-09	4.04313e-07	up	yes
Zm00001d032776	25.0981	3.93984	2.67137	2.83981e-09	4.10733e-07	up	yes
Zm00001d005840	0.101007	0	9.98024	2.87226e-09	4.12834e-07	up	yes
Zm00001d022310	1.34958	0	13.7202	2.87982e-09	4.12834e-07	up	yes
Zm00001d035024	2.55974	0.0257017	6.63799	2.98401e-09	4.2421e-07	up	yes
Zm00001d004869	0.811089	0	12.9856	3.07545e-09	4.35102e-07	up	yes
Zm00001d049390	0.929712	0	13.1826	3.19521e-09	4.5008e-07	up	yes
Zm00001d004510	0.277796	0	11.4398	3.3039e-09	4.59398e-07	up	yes
Zm00001d039814	0.136961	0	10.4195	3.3039e-09	4.59398e-07	up	yes
Zm00001d050775	2.13184	0	14.3798	3.35685e-09	4.64766e-07	up	yes
Zm00001d041777	259.37	14.3166	4.17925	3.44829e-09	4.75395e-07	up	yes
Zm00001d016818	3.62492	0	15.1457	3.50388e-09	4.81012e-07	up	yes
Zm00001d024378	1.53383	0	13.9048	3.74165e-09	5.09336e-07	up	yes
Zm00001d030198	0.967852	0	13.2406	3.80883e-09	5.16311e-07	up	yes
Zm00001d028083	1.16756	0	13.5112	4.01033e-09	5.41141e-07	up	yes
Zm00001d020563	0.201955	0	10.9798	4.02541e-09	5.41141e-07	up	yes
Zm00001d033615	0.984364	0.0216447	5.50711	4.32193e-09	5.76222e-07	up	yes
Zm00001d030216	1.84595	0	14.1721	4.41804e-09	5.81852e-07	up	yes
Zm00001d004208	34.6755	2.30884	3.90868	4.5726e-09	5.99769e-07	up	yes
Zm00001d049017	0.427282	0	12.061	4.70952e-09	6.15238e-07	up	yes
Zm00001d041838	0.766288	0	12.9037	4.85407e-09	6.31575e-07	up	yes
Zm00001d039497	1.51597	0	13.888	4.93217e-09	6.3917e-07	up	yes
Zm00001d017245	0.606106	0	12.5654	4.98964e-09	6.42548e-07	up	yes
Zm00001d047323	1.4858	0	13.8589	4.99791e-09	6.42548e-07	up	yes
Zm00001d047250	1.91373	0	14.2241	5.28791e-09	6.77145e-07	up	yes
Zm00001d051745	3.85661	0	15.235	5.34699e-09	6.82015e-07	up	yes
Zm00001d053226	2.85508	0	14.8012	5.4172e-09	6.8826e-07	up	yes
Zm00001d051344	1.23524	0.090326	3.77351	5.77585e-09	7.30961e-07	up	yes
Zm00001d024978	0.588184	0	12.5221	5.8157e-09	7.3301e-07	up	yes
Zm00001d021538	1.18222	0	13.5292	5.83729e-09	7.3301e-07	up	yes
Zm00001d052589	0.563649	0	12.4606	6.0411e-09	7.55674e-07	up	yes
Zm00001d040375	1.52145	0	13.8932	6.29568e-09	7.73823e-07	up	yes
Zm00001d044558	1.73702	0	14.0843	6.3295e-09	7.73823e-07	up	yes
Zm00001d053364	0.866594	0	13.0811	6.3295e-09	7.73823e-07	up	yes
Zm00001d050281	0.83318	0	13.0244	6.3295e-09	7.73823e-07	up	yes
Zm00001d012167	44.7359	7.06683	2.6623	6.54889e-09	7.97635e-07	up	yes
Zm00001d032879	0.983585	0	13.2638	6.6292e-09	8.04392e-07	up	yes
Zm00001d025480	0.49899	0	12.2848	6.7851e-09	8.17188e-07	up	yes
Zm00001d050618	0.971847	0	13.2465	6.7851e-09	8.17188e-07	up	yes
Zm00001d037395	0.308054	0	11.589	7.17435e-09	8.60869e-07	up	yes
Zm00001d035636	0.599374	0	12.5492	7.30555e-09	8.73378e-07	up	yes
Zm00001d021666	0.753801	0	12.88	7.42963e-09	8.84945e-07	up	yes
Zm00001d049263	6.2306	0	15.9271	7.48427e-09	8.88189e-07	up	yes
Zm00001d053366	0.77076	0	12.9121	7.74436e-09	9.157e-07	up	yes
Zm00001d040216	1.01914	0	13.3151	7.82623e-09	9.18674e-07	up	yes
Zm00001d013111	0.884255	0	13.1102	7.82623e-09	9.18674e-07	up	yes
Zm00001d051709	0.423658	0	12.0487	7.88734e-09	9.19187e-07	up	yes
Zm00001d025589	0.958308	0	13.2263	8.37727e-09	9.72784e-07	up	yes
Zm00001d001166	0.590057	0	12.5266	8.51776e-09	9.85566e-07	up	yes
Zm00001d001770	1.80757	0	14.1418	8.77016e-09	1.00757e-06	up	yes
Zm00001d051342	1.27557	0	13.6389	8.77016e-09	1.00757e-06	up	yes
Zm00001d011546	0.604724	0	12.5621	8.85106e-09	1.01327e-06	up	yes
Zm00001d040673	1.6477	0	14.0082	8.91909e-09	1.01747e-06	up	yes
Zm00001d043750	1.13919	0	13.4757	8.98833e-09	1.01944e-06	up	yes
Zm00001d012538	5.08257	0.655161	2.95564	9.17443e-09	1.03566e-06	up	yes
Zm00001d036913	0.567243	0	12.4698	9.28046e-09	1.04399e-06	up	yes
Zm00001d011137	1.05616	0	13.3665	9.43423e-09	1.05761e-06	up	yes
Zm00001d045423	4.46582	0.492289	3.18135	9.77775e-09	1.09234e-06	up	yes
Zm00001d030314	1.36845	0	13.7403	1.00239e-08	1.11599e-06	up	yes
Zm00001d012099	0.52619	0	12.3614	1.0754e-08	1.18852e-06	up	yes
Zm00001d010511	1.89192	0	14.2076	1.08608e-08	1.18875e-06	up	yes
Zm00001d035316	0.595785	0	12.5406	1.08608e-08	1.18875e-06	up	yes
Zm00001d024575	1.39565	0	13.7687	1.10695e-08	1.20751e-06	up	yes
Zm00001d030930	0.64345	0	12.6516	1.16459e-08	1.26188e-06	up	yes
Zm00001d045221	0.863445	0	13.0759	1.26898e-08	1.36825e-06	up	yes
Zm00001d004333	0.984976	0	13.2659	1.33414e-08	1.42182e-06	up	yes
Zm00001d002458	1.31892	0	13.6871	1.33414e-08	1.42182e-06	up	yes
Zm00001d039288	0.718759	0	12.8113	1.36947e-08	1.45469e-06	up	yes
Zm00001d041776	213.147	11.4844	4.2141	1.3756e-08	1.45643e-06	up	yes
Zm00001d051334	68.8524	11.9212	2.52998	1.42389e-08	1.50264e-06	up	yes
Zm00001d013879	62.2921	5.23613	3.57248	1.46851e-08	1.54471e-06	up	yes
Zm00001d033017	0.630194	0	12.6216	1.4883e-08	1.56045e-06	up	yes
Zm00001d005775	24.8689	4.55039	2.45028	1.57735e-08	1.64849e-06	up	yes
Zm00001d035222	0.749928	0	12.8725	1.61608e-08	1.67814e-06	up	yes
Zm00001d019794	1.51067	0	13.8829	1.61608e-08	1.67814e-06	up	yes
Zm00001d029385	3.4843	0	15.0886	1.63171e-08	1.68357e-06	up	yes
Zm00001d007132	1.71969	0	14.0699	1.69949e-08	1.74794e-06	up	yes
Zm00001d032255	1.43985	0	13.8136	1.75866e-08	1.79738e-06	up	yes
Zm00001d049771	0.176732	0	10.7873	1.75866e-08	1.79738e-06	up	yes
Zm00001d051787	365.758	40.7546	3.16585	1.85296e-08	1.88781e-06	up	yes
Zm00001d046528	0.666967	0	12.7034	1.91208e-08	1.92698e-06	up	yes
Zm00001d016718	5.51531	0.425648	3.69571	2.02774e-08	2.02043e-06	up	yes
Zm00001d052104	1.59102	0.23147	2.78106	2.03303e-08	2.02043e-06	up	yes
Zm00001d038282	16.8103	1.93173	3.12138	2.07405e-08	2.05196e-06	up	yes
Zm00001d049686	0.569346	0	12.4751	2.08375e-08	2.05196e-06	up	yes
Zm00001d004109	0.182572	0	10.8343	2.08375e-08	2.05196e-06	up	yes
Zm00001d042752	0.538202	0	12.3939	2.27418e-08	2.19937e-06	up	yes
Zm00001d032064	0.240812	0	11.2337	2.27418e-08	2.19937e-06	up	yes
Zm00001d039888	0.617957	0	12.5933	2.27418e-08	2.19937e-06	up	yes
Zm00001d001312	2.80888	0	14.7777	2.34911e-08	2.26507e-06	up	yes
Zm00001d003107	1.77207	0.182186	3.28195	2.49131e-08	2.39506e-06	up	yes
Zm00001d031047	1.034	0.034485	4.90612	2.54409e-08	2.43856e-06	up	yes
Zm00001d046297	548.399	63.6174	3.10773	2.58068e-08	2.46634e-06	up	yes
Zm00001d027313	6.28242	0.0805467	6.28535	2.81903e-08	2.66271e-06	up	yes
Zm00001d007290	0.417002	0	12.0258	3.17222e-08	2.98761e-06	up	yes
Zm00001d024913	43.3604	8.43039	2.36271	3.19018e-08	2.99581e-06	up	yes
Zm00001d029921	2.6278	0.363796	2.85265	3.20322e-08	2.99936e-06	up	yes
Zm00001d041103	0.476925	0	12.2195	3.24299e-08	3.01915e-06	up	yes
Zm00001d029743	0.386217	0	11.9152	3.24299e-08	3.01915e-06	up	yes
Zm00001d032225	0.735594	0.0839787	3.13081	3.25941e-08	3.02574e-06	up	yes
Zm00001d044634	0.181008	0	10.8218	3.54752e-08	3.23754e-06	up	yes
Zm00001d049672	0.243013	0	11.2468	3.54752e-08	3.23754e-06	up	yes
Zm00001d009642	0.508069	0	12.3108	3.54752e-08	3.23754e-06	up	yes
Zm00001d029152	0.191677	0	10.9045	3.90689e-08	3.50426e-06	up	yes
Zm00001d015050	0.325063	0	11.6665	3.90689e-08	3.50426e-06	up	yes
Zm00001d030399	0.351887	0	11.7809	3.90689e-08	3.50426e-06	up	yes
Zm00001d024258	4.28738	0.813219	2.39838	3.96435e-08	3.53821e-06	up	yes
Zm00001d029373	1.81005	0.442367	2.03272	4.0381e-08	3.59413e-06	up	yes
Zm00001d048795	140.689	32.1212	2.13091	4.33534e-08	3.81675e-06	up	yes
Zm00001d031733	0.482284	0	12.2357	4.51701e-08	3.94453e-06	up	yes
Zm00001d051655	0.925556	0	13.1761	4.51701e-08	3.94453e-06	up	yes
Zm00001d003210	0.445186	0	12.1202	4.7008e-08	4.08301e-06	up	yes
Zm00001d028179	1.08849	0	13.41	4.7008e-08	4.08301e-06	up	yes
Zm00001d041853	2.66104	0.330317	3.01007	4.95404e-08	4.29147e-06	up	yes
Zm00001d008381	3.84627	0.328446	3.54973	5.09509e-08	4.39018e-06	up	yes
Zm00001d015419	0.351495	0	11.7793	5.16778e-08	4.41757e-06	up	yes
Zm00001d042594	0.450746	0	12.1381	5.16778e-08	4.41757e-06	up	yes
Zm00001d040493	0.472505	0	12.2061	5.16778e-08	4.41757e-06	up	yes
Zm00001d045579	1.5702	0.286897	2.45235	6.03566e-08	5.10557e-06	up	yes
Zm00001d052667	1.27115	0.219649	2.53287	6.08114e-08	5.13064e-06	up	yes
Zm00001d048710	59.2275	11.3748	2.38043	6.1396e-08	5.16652e-06	up	yes
Zm00001d043477	36.1452	5.41464	2.73886	6.23115e-08	5.22997e-06	up	yes
Zm00001d002614	3.45371	0.641487	2.42866	7.10387e-08	5.93173e-06	up	yes
Zm00001d020794	33.1155	8.01157	2.04735	7.60368e-08	6.31651e-06	up	yes
Zm00001d035209	0.317368	0	11.6319	7.75347e-08	6.42447e-06	up	yes
Zm00001d002342	2.99415	0.550534	2.44324	8.0376e-08	6.62601e-06	up	yes
Zm00001d046916	73.739	16.3341	2.17454	8.09296e-08	6.65471e-06	up	yes
Zm00001d038338	3.99097	0.595775	2.7439	8.75033e-08	7.17704e-06	up	yes
Zm00001d008569	37.2535	5.91151	2.65578	1.02882e-07	8.39594e-06	up	yes
Zm00001d005889	0.587085	0.0434273	3.75689	1.12823e-07	9.13808e-06	up	yes
Zm00001d011748	1.79235	0.0127183	7.1388	1.13307e-07	9.15442e-06	up	yes
Zm00001d031665	0.384896	0	11.9103	1.24014e-07	9.9451e-06	up	yes
Zm00001d032284	9.97515	2.23749	2.15646	1.36194e-07	1.08147e-05	up	yes
Zm00001d027330	27.4244	6.55557	2.06467	1.47929e-07	1.16044e-05	up	yes
Zm00001d030775	10.4573	1.59022	2.71722	1.65183e-07	1.28336e-05	up	yes
Zm00001d023225	11.0321	2.61224	2.07835	1.94527e-07	1.49343e-05	up	yes
Zm00001d053004	1.98283	0.224523	3.14263	1.98789e-07	1.51895e-05	up	yes
Zm00001d012808	3.29329	0.409759	3.00668	2.073e-07	1.58026e-05	up	yes
Zm00001d038065	7.02406	1.69275	2.05293	2.09851e-07	1.59595e-05	up	yes
Zm00001d007882	0.975907	0.102173	3.25573	2.10636e-07	1.59692e-05	up	yes
Zm00001d028591	1.9387	0.337257	2.52317	2.1343e-07	1.61182e-05	up	yes
Zm00001d024723	898.066	220.973	2.02295	2.23518e-07	1.68408e-05	up	yes
Zm00001d012498	11.8114	2.64515	2.15876	2.50082e-07	1.8755e-05	up	yes
Zm00001d016160	3.08843	0.559358	2.46503	2.78687e-07	2.0852e-05	up	yes
Zm00001d036929	5.34147	0.291271	4.1968	3.46297e-07	2.54406e-05	up	yes
Zm00001d042934	0.471161	0	12.202	3.49265e-07	2.55428e-05	up	yes
Zm00001d013907	263.204	23.7877	3.46789	3.87461e-07	2.81457e-05	up	yes
Zm00001d032613	6.77471	1.4469	2.2272	4.84475e-07	3.46491e-05	up	yes
Zm00001d026147	9.27494	1.68396	2.46148	5.93498e-07	4.19828e-05	up	yes
Zm00001d011661	63.4102	7.54538	3.07105	6.24786e-07	4.4004e-05	up	yes
Zm00001d034062	9.54835	1.78387	2.42024	6.33486e-07	4.45199e-05	up	yes
Zm00001d006449	2.09917	0.37401	2.48867	6.81809e-07	4.77089e-05	up	yes
Zm00001d003281	0.256122	0	11.3226	7.01172e-07	4.8748e-05	up	yes
Zm00001d014989	1.52228	0.126016	3.59456	7.39149e-07	5.12783e-05	up	yes
Zm00001d025343	0.358348	0	11.8071	7.74038e-07	5.35839e-05	up	yes
Zm00001d015363	1.03672	0.167706	2.62802	7.9342e-07	5.48086e-05	up	yes
Zm00001d033087	0.47671	0	12.2189	8.08555e-07	5.57353e-05	up	yes
Zm00001d044898	5.17711	0.867461	2.57728	8.32107e-07	5.7237e-05	up	yes
Zm00001d021462	2.03919	0	14.3157	8.76908e-07	6.01908e-05	up	yes
Zm00001d047911	8.91844	1.92402	2.21267	1.03754e-06	7.03228e-05	up	yes
Zm00001d028770	44.8689	10.1412	2.14549	1.06926e-06	7.21709e-05	up	yes
Zm00001d048353	0.420205	0	12.0369	1.18008e-06	7.89919e-05	up	yes
Zm00001d036840	13.7082	2.72008	2.33332	1.18547e-06	7.91892e-05	up	yes
Zm00001d041384	1.91047	0.282634	2.75693	1.29116e-06	8.53693e-05	up	yes
Zm00001d002186	8.4222	1.72896	2.28429	1.30069e-06	8.58241e-05	up	yes
Zm00001d052733	22.5282	5.37329	2.06785	1.79428e-06	0.00011603	up	yes
Zm00001d029718	14.3288	2.66282	2.42788	2.07698e-06	0.000132984	up	yes
Zm00001d022547	5.4677	1.32018	2.0502	2.38753e-06	0.000151077	up	yes
Zm00001d044083	4.4276	0.952715	2.21641	2.47713e-06	0.00015644	up	yes
Zm00001d045763	17.1841	3.81626	2.17085	2.62591e-06	0.000165082	up	yes
Zm00001d051789	2.04298	0.0854311	4.57977	2.94514e-06	0.000182441	up	yes
Zm00001d007331	4.16063	0.735885	2.49925	3.05845e-06	0.00018838	up	yes
Zm00001d050865	3.73563	0.70146	2.41292	3.10934e-06	0.000191151	up	yes
Zm00001d005472	0.583168	0.010152	5.84408	3.23607e-06	0.00019819	up	yes
Zm00001d052910	1.3387	0.0356767	5.22971	3.76358e-06	0.000228338	up	yes
Zm00001d049224	5.28786	0.78372	2.75428	3.90789e-06	0.00023533	up	yes
Zm00001d017510	2.14936	0	14.3916	4.37335e-06	0.0002619	up	yes
Zm00001d023841	0.517417	0.0962493	2.42648	4.57156e-06	0.000273265	up	yes
Zm00001d037080	1.34672	0.275427	2.2897	4.62888e-06	0.000275789	up	yes
Zm00001d022295	0.30638	0	11.5811	4.73744e-06	0.000280591	up	yes
Zm00001d043728	1.68356	0.324772	2.37402	4.92648e-06	0.000291256	up	yes
Zm00001d047143	0.66178	0	12.6921	5.36434e-06	0.000314844	up	yes
Zm00001d047736	0.488666	0.113541	2.10563	5.75223e-06	0.000334579	up	yes
Zm00001d012146	3.60816	0.90172	2.00051	6.00223e-06	0.000348495	up	yes
Zm00001d030828	8.30322	1.52711	2.44287	6.13137e-06	0.00035409	up	yes
Zm00001d020960	0.283858	0.0100087	4.82585	6.1779e-06	0.000356141	up	yes
Zm00001d015092	26.2779	2.84174	3.209	6.51293e-06	0.000374124	up	yes
Zm00001d016062	7.33893	1.2754	2.52462	6.76283e-06	0.000385065	up	yes
Zm00001d025533	1.71337	0.209907	3.02901	6.78597e-06	0.000385705	up	yes
Zm00001d011872	0.147037	0	10.522	7.08797e-06	0.000400761	up	yes
Zm00001d010655	0.294879	0	11.5259	7.11391e-06	0.000401527	up	yes
Zm00001d051333	1.84714	0.245294	2.91271	7.66781e-06	0.000429795	up	yes
Zm00001d052041	4.03901	0.613804	2.71815	8.08469e-06	0.00045238	up	yes
Zm00001d036769	1.1912	0	13.5401	8.29938e-06	0.000460417	up	yes
Zm00001d042906	10.8059	2.48588	2.12	8.51477e-06	0.000469152	up	yes
Zm00001d007343	1.02851	0	13.3283	9.87449e-06	0.00053408	up	yes
Zm00001d007045	23.4604	5.27837	2.15206	1.00729e-05	0.000543029	up	yes
Zm00001d046749	1.84757	0.428688	2.10763	1.01191e-05	0.000544583	up	yes
Zm00001d045913	7.11293	1.14832	2.63092	1.0379e-05	0.000554881	up	yes
Zm00001d027141	1.69364	0.193087	3.13281	1.06645e-05	0.00056641	up	yes
Zm00001d035570	0.197186	0	10.9453	1.13045e-05	0.000593659	up	yes
Zm00001d031531	5.25194	1.11363	2.23758	1.21661e-05	0.000629643	up	yes
Zm00001d052331	2.02642	0.103086	4.29702	1.39931e-05	0.00070725	up	yes
Zm00001d032501	8.39044	1.94788	2.10684	1.43435e-05	0.000721587	up	yes
Zm00001d053124	3.75657	0.734385	2.35481	1.45551e-05	0.000729052	up	yes
Zm00001d040003	9.55755	2.08431	2.19707	1.46464e-05	0.000732276	up	yes
Zm00001d028967	0.309686	0.0505076	2.61623	1.51589e-05	0.000752524	up	yes
Zm00001d040581	2.76997	0.478429	2.53349	1.59549e-05	0.000786767	up	yes
Zm00001d028599	11.5735	1.47471	2.97232	1.61571e-05	0.000795527	up	yes
Zm00001d033367	0.191495	0	10.9031	1.64931e-05	0.000809708	up	yes
Zm00001d009759	3.59414	0.655138	2.45577	1.64951e-05	0.000809708	up	yes
Zm00001d049997	0.741634	0.0801227	3.21043	1.82882e-05	0.00088698	up	yes
Zm00001d033097	0.27144	0	11.4064	1.97691e-05	0.000948857	up	yes
Zm00001d032274	0.96514	0.232449	2.05382	2.04532e-05	0.000975908	up	yes
Zm00001d037218	0.499568	0.0152253	5.03613	2.21944e-05	0.00104514	up	yes
Zm00001d039946	2.43816	0.302491	3.01083	2.54464e-05	0.0011828	up	yes
Zm00001d013255	3.04099	0.138208	4.45963	2.6716e-05	0.00123235	up	yes
Zm00001d047093	0.507505	0	12.3092	2.76896e-05	0.00127246	up	yes
Zm00001d038045	3.44286	0	15.0713	2.80022e-05	0.00128501	up	yes
Zm00001d029730	2.20728	0.27855	2.98626	2.85729e-05	0.00130934	up	yes
Zm00001d026663	4.40888	0.961599	2.1969	3.13033e-05	0.00142439	up	yes
Zm00001d007475	0.263911	0.0377825	2.80426	3.18543e-05	0.00144743	up	yes
Zm00001d009557	1.72018	0.243008	2.82349	3.35065e-05	0.00151401	up	yes
Zm00001d013090	0.909616	0.198029	2.19955	3.5997e-05	0.00161528	up	yes
Zm00001d016735	0.223946	0.0214893	3.38146	3.61009e-05	0.0016177	up	yes
Zm00001d039414	53.9026	8.34254	2.6918	3.75705e-05	0.00167161	up	yes
Zm00001d033279	11.1497	2.07222	2.42776	4.03678e-05	0.00176974	up	yes
Zm00001d026500	29.7398	7.31916	2.02265	4.16292e-05	0.00181521	up	yes
Zm00001d009362	0.629035	0.154747	2.02323	4.48724e-05	0.00192553	up	yes
Zm00001d013177	1.45467	0.200743	2.85727	4.55433e-05	0.00195174	up	yes
Zm00001d035143	0.156436	0	10.6114	4.66237e-05	0.00198491	up	yes
Zm00001d047425	3.94505	0.675199	2.54666	4.78396e-05	0.00202846	up	yes
Zm00001d038052	32.4614	2.155	3.91296	4.79992e-05	0.00203013	up	yes
Zm00001d017399	0.487739	0.0533193	3.19338	5.24349e-05	0.00217514	up	yes
Zm00001d027965	7.07036	0.601754	3.55454	5.51048e-05	0.00227135	up	yes
Zm00001d037565	0.400935	0.0071269	5.81395	5.60629e-05	0.00230498	up	yes
Zm00001d010545	0.681355	0.071641	3.24955	5.86521e-05	0.0023842	up	yes
Zm00001d020605	0.778709	0.006672	6.86682	5.91904e-05	0.00240006	up	yes
Zm00001d000607	12.9107	2.26802	2.50907	6.33622e-05	0.00254375	up	yes
Zm00001d002496	5.23995	1.07572	2.28425	6.34536e-05	0.00254427	up	yes
Zm00001d022259	8.25143	1.72671	2.25662	6.51523e-05	0.00259951	up	yes
Zm00001d032969	62.4452	7.8775	2.98678	6.65117e-05	0.00264723	up	yes
Zm00001d007391	0.703825	0.171177	2.03973	6.78521e-05	0.00268988	up	yes
Zm00001d046422	3.14968	0.590228	2.41586	7.35736e-05	0.00288926	up	yes
Zm00001d049308	2.92074	0.656486	2.1535	7.61712e-05	0.00295544	up	yes
Zm00001d015378	8.5279	1.62877	2.3884	8.00885e-05	0.0030816	up	yes
Zm00001d029293	1.34508	0.189852	2.82475	8.22666e-05	0.0031532	up	yes
Zm00001d022144	22.1295	4.36132	2.34313	8.68066e-05	0.00329881	up	yes
Zm00001d013660	2.43294	0.391326	2.63626	8.89066e-05	0.00336495	up	yes
Zm00001d038287	0.383087	0	11.9035	9.02868e-05	0.00340525	up	yes
Zm00001d041462	10.5481	1.57943	2.73951	9.54276e-05	0.00355364	up	yes
Zm00001d053094	1.89055	0.0443919	5.41236	0.00010174	0.00373717	up	yes
Zm00001d035390	15.5877	0	17.25	0.000102092	0.00374584	up	yes
Zm00001d013089	15.1477	3.052	2.31128	0.00011025	0.00399988	up	yes
Zm00001d003052	1.77156	0.328734	2.43003	0.000114185	0.00412416	up	yes
Zm00001d047625	34.1353	4.30597	2.98685	0.00011562	0.00415284	up	yes
Zm00001d050848	0.388787	0.0146637	4.72866	0.00013058	0.00461847	up	yes
Zm00001d048774	0.364243	0	11.8307	0.000132957	0.00466689	up	yes
Zm00001d016814	1.62402	0.25914	2.64776	0.000133218	0.00467099	up	yes
Zm00001d043276	3.92971	0.474285	3.0506	0.000141585	0.00491647	up	yes
Zm00001d002568	10.6851	1.23795	3.10958	0.000142553	0.00494479	up	yes
Zm00001d013995	0.333644	0.00576433	5.85501	0.000145303	0.00502404	up	yes
Zm00001d021463	1.73562	0	14.0832	0.000145837	0.00503713	up	yes
Zm00001d032719	176.539	21.4788	3.039	0.000147305	0.0050824	up	yes
Zm00001d014443	1.67684	0.402421	2.05897	0.000147563	0.0050844	up	yes
Zm00001d053156	0.169925	0	10.7307	0.000149885	0.00513859	up	yes
Zm00001d045130	0.700645	0.14637	2.25906	0.000150222	0.0051447	up	yes
Zm00001d017292	0.587582	0.00613933	6.58056	0.000167076	0.00564435	up	yes
Zm00001d022791	2.84956	0.600591	2.24629	0.000168346	0.00567543	up	yes
Zm00001d001076	16.1349	2.90274	2.4747	0.000177202	0.00592465	up	yes
Zm00001d031161	8.89859	1.03032	3.11048	0.000178662	0.0059618	up	yes
Zm00001d025016	4.59659	0.599047	2.93982	0.000179348	0.00597789	up	yes
Zm00001d022570	1.57214	0.355671	2.14412	0.000181559	0.00603297	up	yes
Zm00001d020013	5.63181	1.08402	2.37721	0.000182117	0.00604532	up	yes
Zm00001d007717	0.924	0.027896	5.04976	0.000217083	0.00698415	up	yes
Zm00001d052389	0.55878	0.0277263	4.33295	0.00023543	0.00745597	up	yes
Zm00001d026434	0.345206	0.0564732	2.61182	0.000265437	0.00821358	up	yes
Zm00001d002348	0.736967	0.1598	2.20533	0.000267868	0.00828091	up	yes
Zm00001d029059	1.14973	0.245417	2.22799	0.000271623	0.00836488	up	yes
Zm00001d026336	0.128382	0	10.3262	0.000274719	0.008407	up	yes
Zm00001d042754	2.37003	0.479616	2.30495	0.000280958	0.00857108	up	yes
Zm00001d043004	0.632848	0.0614047	3.36544	0.000282386	0.00859915	up	yes
Zm00001d048281	1.82846	0.227076	3.00938	0.000289287	0.00877557	up	yes
Zm00001d012431	0.438545	0	12.0985	0.000296294	0.00893793	up	yes
Zm00001d023450	14.4184	3.01482	2.25776	0.000299047	0.00899585	up	yes
Zm00001d046223	1.3078	0.162267	3.0107	0.000314627	0.00939474	up	yes
Zm00001d035561	6.01574	0.321983	4.22369	0.000322545	0.00956066	up	yes
Zm00001d006874	0.55093	0.0809463	2.76683	0.000329727	0.00968494	up	yes
Zm00001d024470	0.257869	0.0576168	2.16208	0.00034374	0.0100329	up	yes
Zm00001d032651	3.31668	0.784552	2.0798	0.000348248	0.0101371	up	yes
Zm00001d038740	0.961726	0	13.2314	0.000349379	0.0101517	up	yes
Zm00001d036889	1.49382	0.100563	3.89284	0.000352757	0.0102224	up	yes
Zm00001d016216	1.50788	0.281783	2.41987	0.000359223	0.0103634	up	yes
Zm00001d034723	8.23335	1.59207	2.37058	0.000359666	0.0103669	up	yes
Zm00001d011752	2.3258	0.12405	4.22873	0.000372056	0.0106766	up	yes
Zm00001d032545	0.739646	0.110566	2.74192	0.000375724	0.0107438	up	yes
Zm00001d005570	8.3303	0.737286	3.49807	0.000392858	0.0111746	up	yes
Zm00001d032533	5.5939	0.786158	2.83096	0.000432816	0.0120571	up	yes
Zm00001d032407	0.663541	0.0378003	4.13372	0.00043502	0.012086	up	yes
Zm00001d031769	1.74519	0.353928	2.30185	0.000443657	0.0122433	up	yes
Zm00001d027746	1.75322	0.0152923	6.84106	0.000448885	0.012359	up	yes
Zm00001d046489	9.27065	1.0296	3.17059	0.00045977	0.0125595	up	yes
Zm00001d035981	3.40407	0.549116	2.63208	0.000483381	0.0130832	up	yes
Zm00001d034195	0.551077	0	12.428	0.000484554	0.013093	up	yes
Zm00001d025564	1.64212	0.182015	3.17343	0.000486724	0.0131298	up	yes
Zm00001d024014	2.06782	0.0821677	4.65339	0.000523023	0.0139694	up	yes
Zm00001d017474	1.22738	0.147217	3.05957	0.000527885	0.0140645	up	yes
Zm00001d021470	1.13399	0.084201	3.75143	0.000536333	0.0142544	up	yes
Zm00001d019303	1.17503	0.228732	2.36097	0.000557267	0.0147503	up	yes
Zm00001d000973	0.207617	0	11.0197	0.000583848	0.0153162	up	yes
Zm00001d023289	11.8315	2.54613	2.21625	0.000586081	0.0153623	up	yes
Zm00001d013723	1.64082	0.032124	5.67462	0.00059036	0.015462	up	yes
Zm00001d016522	1.24901	0.0341617	5.19226	0.000609468	0.0158726	up	yes
Zm00001d018323	0.961316	0.0769523	3.64297	0.000625865	0.0162344	up	yes
Zm00001d017713	0.133343	0	10.3809	0.000673703	0.0172679	up	yes
Zm00001d003051	1.04936	0.035368	4.89092	0.000709772	0.0180638	up	yes
Zm00001d043001	0.581005	0.0653117	3.15314	0.000730331	0.0185143	up	yes
Zm00001d007427	1.20216	0.038994	4.94623	0.000743116	0.018765	up	yes
Zm00001d002721	132.499	18.137	2.86897	0.000760632	0.0191179	up	yes
Zm00001d008190	0.31213	0.002257	7.1116	0.000765718	0.0192308	up	yes
Zm00001d004614	15.3048	1.90575	3.00555	0.000831786	0.0205085	up	yes
Zm00001d024030	0.177748	0	10.7956	0.000847426	0.0207992	up	yes
Zm00001d017477	1.62713	0.283721	2.51978	0.000849701	0.0208041	up	yes
Zm00001d016271	2.57098	0.542666	2.24418	0.000850025	0.0208041	up	yes
Zm00001d014614	7.28294	1.70378	2.09578	0.000941176	0.0225534	up	yes
Zm00001d021280	0.742631	0.144985	2.35674	0.000969179	0.0231048	up	yes
Zm00001d017427	0.0875508	0	9.77398	0.000980937	0.0233165	up	yes
Zm00001d052191	4.05649	0.309827	3.7107	0.000983045	0.0233495	up	yes
Zm00001d029886	7.70509	1.9245	2.00133	0.00102932	0.0242958	up	yes
Zm00001d052471	6.84681	1.70872	2.00252	0.00104636	0.0245297	up	yes
Zm00001d025518	2.06372	0.396346	2.38042	0.00107913	0.0251822	up	yes
Zm00001d007831	37.5346	9.02779	2.05578	0.00108339	0.0252514	up	yes
Zm00001d023661	2.3991	0.364483	2.71857	0.00109761	0.0255463	up	yes
Zm00001d042933	0.383462	0	11.9049	0.00112034	0.0260006	up	yes
Zm00001d030750	19.9453	4.41397	2.1759	0.00116662	0.0269013	up	yes
Zm00001d052716	1.08648	0.173199	2.64916	0.00118428	0.027173	up	yes
Zm00001d034414	43.8576	9.23034	2.24837	0.00125407	0.0284319	up	yes
Zm00001d047247	4.46568	0.906539	2.30044	0.00126047	0.0285372	up	yes
Zm00001d017606	1.1456	0.202545	2.49979	0.00130934	0.0294379	up	yes
Zm00001d007777	0.111297	0	10.1202	0.0013156	0.0294764	up	yes
Zm00001d015028	3.78697	0.271319	3.80298	0.00132292	0.0296199	up	yes
Zm00001d034623	0.937024	0	13.1939	0.00133893	0.0298957	up	yes
Zm00001d042122	28.3311	6.93705	2.02999	0.00134247	0.0299335	up	yes
Zm00001d004332	0.478489	0	12.2243	0.00134571	0.029985	up	yes
Zm00001d022669	3.57159	0.553395	2.69018	0.00141121	0.031018	up	yes
Zm00001d043872	0.960938	0.150417	2.67548	0.00144332	0.0316163	up	yes
Zm00001d035434	9.14542	1.86948	2.29041	0.00145954	0.0319069	up	yes
Zm00001d026094	0.151214	0	10.5624	0.00146924	0.0320543	up	yes
Zm00001d014074	1.37673	0.219436	2.64938	0.00162709	0.0349007	up	yes
Zm00001d041516	0.167707	0	10.7117	0.00167211	0.0357579	up	yes
Zm00001d043535	1.15611	0.235096	2.29796	0.00167611	0.0358196	up	yes
Zm00001d034546	1.96245	0.173515	3.49952	0.00170115	0.0362114	up	yes
Zm00001d008664	1.45851	0.051495	4.82392	0.00170963	0.0363059	up	yes
Zm00001d035766	1.1749	0.264066	2.15357	0.00172303	0.0365572	up	yes
Zm00001d044947	0.873122	0.194621	2.16552	0.00175321	0.0371002	up	yes
Zm00001d048099	0.466593	0.0415325	3.48985	0.00177855	0.0374895	up	yes
Zm00001d035145	0.185113	0.00377733	5.6149	0.00179676	0.0378242	up	yes
Zm00001d039833	43.9806	8.42667	2.38383	0.00179965	0.0378604	up	yes
Zm00001d042514	1.03578	0	13.3384	0.00182446	0.0382381	up	yes
Zm00001d004539	15.394	3.48408	2.14352	0.00183235	0.0383739	up	yes
Zm00001d007180	0.872659	0.203631	2.09946	0.00183403	0.0383844	up	yes
Zm00001d049413	1.3583	0.0172686	6.29751	0.00183834	0.0384005	up	yes
Zm00001d029580	1.68264	0.317129	2.40759	0.00184913	0.0385462	up	yes
Zm00001d011594	0.811574	0.120885	2.74709	0.0018506	0.0385462	up	yes
Zm00001d050544	0.239116	0.00766633	4.96303	0.00185581	0.0386156	up	yes
Zm00001d001961	1.57808	0.142872	3.46538	0.00187134	0.0388389	up	yes
Zm00001d050097	0.177574	0	10.7942	0.00189383	0.0391946	up	yes
Zm00001d001299	3.26388	0.0375313	6.44235	0.00190343	0.0393286	up	yes
Zm00001d022950	0.323684	0	11.6604	0.00195301	0.0401738	up	yes
Zm00001d005802	2.269	0.341548	2.7319	0.00203364	0.0413597	up	yes
Zm00001d032401	0.720931	0.172222	2.06559	0.00204842	0.041634	up	yes
Zm00001d039129	0.647995	0.0289233	4.48568	0.00219042	0.0437067	up	yes
Zm00001d003304	1.36806	0.232165	2.55891	0.00220657	0.0439389	up	yes
Zm00001d045987	0.575593	0.0989659	2.54005	0.00221665	0.0440312	up	yes
Zm00001d030345	3.5874	0.737923	2.2814	0.00224428	0.0444438	up	yes
Zm00001d046187	1.14751	0.197326	2.53986	0.0022906	0.0451404	up	yes
Zm00001d011466	0.601923	0.016008	5.23271	0.00229246	0.0451497	up	yes
Zm00001d052383	0.988716	0.003545	8.12363	0.00230061	0.0452051	up	yes
Zm00001d053557	6.4108	1.4331	2.16136	0.00231107	0.045297	up	yes
Zm00001d031601	18.7625	4.29675	2.12654	0.00234005	0.0457256	up	yes
Zm00001d013979	4.01904	0.706	2.50911	0.00236932	0.0460752	up	yes
Zm00001d008014	0.400075	0	11.9661	0.00239587	0.046452	up	yes
Zm00001d032055	2.27816	0.500122	2.18751	0.00245029	0.0471966	up	yes
Zm00001d029703	0.122332	0	10.2566	0.00248301	0.0477416	up	yes
Zm00001d048337	0.317318	0.028731	3.46525	0.00249103	0.0478336	up	yes
Zm00001d026182	2.16689	0.284872	2.92724	0.00251134	0.0481435	up	yes
Zm00001d013054	2.24735	0.46475	2.2737	0.00252072	0.0482948	up	yes
Zm00001d011637	0.425522	0.0195327	4.44527	0.0026505	0.0499831	up	yes
