# Supplementary material for: Morphological characterization and transcriptome analysis of leaf angle mutant bhlh112 in maize [Zea mays L.]
Source: Front Plant Sci. 2022 Oct 7;13:995815. doi: 10.3389/fpls.2022.995815 (PMC9585351; doi:10.3389/fpls.2022.995815)
Supplement: Supplementary file 8 [file Table_8.xlsx]

## Sheet: Sheet1
Supplementary Table S8 The 62 hub genes of the white module
GeneID	Gene description
Zm00001d005228	Ribosomal protein L22p/L17e family protein
Zm00001d005359	ATP-dependent protease Clp ATPase subunit
Zm00001d005762	alpha/beta-Hydrolases superfamily protein
Zm00001d006821	Mitochondrial import inner membrane translocase subunit TIM17-2
Zm00001d006872	NA
Zm00001d006907	Transcription elongation factor SPT4
Zm00001d008244	Isocitrate dehydrogenase [NAD] catalytic subunit 5 mitochondrial
Zm00001d008499	PAP fibrillin domain proteinexpressed protein
Zm00001d008600	Sulfoquinovosyl transferase SQD2
Zm00001d009849	NifU-like protein 4 mitochondrial
Zm00001d011189	DUF3511 domain protein
Zm00001d011474	Ran GTP binding protein
Zm00001d012425	Ribosomal protein L17 family protein
Zm00001d013392	Histone H2A
Zm00001d013506	Myelin-associated oligodendrocyte basic protein isoform 1
Zm00001d014065	eucaryotic initiation factor7
Zm00001d014192	ACT domain-containing protein ACR11
Zm00001d014445	Protein kinase superfamily protein
Zm00001d014446	Protein kinase superfamily protein
Zm00001d014585	Cytoplasmic 60S subunit biogenesis factor REI1 homolog 1
Zm00001d015856	citrate synthase1
Zm00001d016365	dihydrolipoamide S-acetyltransferase1
Zm00001d016561	chaperone protein dnaJ-related
Zm00001d018200	SAUR12-auxin-responsive SAUR family member
Zm00001d018535	brick1
Zm00001d018781	Seed maturation protein
Zm00001d018927	Protein FATTY ACID EXPORT 1 chloroplastic
Zm00001d019439	Dehydrogenase/reductase SDR family member 2
Zm00001d020004	plastid phosphate/phosphoenolpyruvate translocator2
Zm00001d020188	Protein arginine N-methyltransferase 1.1
Zm00001d021881	Root border cell-specific protein
Zm00001d024009	Chaperone protein ClpC1 chloroplastic
Zm00001d024109	Uracil phosphoribosyltransferase
Zm00001d024373	60S ribosomal protein L7-2
Zm00001d027457	NA
Zm00001d027573	NA
Zm00001d027881	NA
Zm00001d029050	Serine/threonine-protein kinase AtPK1/AtPK6
Zm00001d029983	Beta-amylase 3 chloroplastic
Zm00001d031050	DEAD-box ATP-dependent RNA helicase 53
Zm00001d032257	Aminoaldehyde dehydrogenase 1b
Zm00001d034497	cysteine-rich TM module stress tolerance protein
Zm00001d035440	low temperature-induced protein15
Zm00001d036371	ATP-dependent zinc metalloprotease FTSH 5 chloroplastic
Zm00001d036738	S-adenosyl-L-methionine-dependent methyltransferases superfamily protein
Zm00001d036951	glutathione transferase19
Zm00001d038960	S-adenosyl-L-methionine-dependent methyltransferases superfamily protein
Zm00001d038973	50S ribosomal protein L21 mitochondrial
Zm00001d039312	non-yellow coloring1
Zm00001d039667	Thiol-disulphide oxidoreductase DCC
Zm00001d040066	Glycosyltransferase family 61 protein
Zm00001d041480	DEAD-box ATP-dependent RNA helicase 53
Zm00001d042397	ABC transporter B family member 26 chloroplastic
Zm00001d045372	Iron-sulfur assembly protein IscA
Zm00001d045500	ribosomal protein L29 family protein
Zm00001d048506	Mitochondrial import inner membrane translocase subunit TIM23-3
Zm00001d050341	Chaperonin-like RbcX protein
Zm00001d050375	14-3-3-like protein
Zm00001d050965	Isocitrate dehydrogenase [NAD] regulatory subunit 3 mitochondrial
Zm00001d051567	alpha/beta-Hydrolases superfamily protein
Zm00001d051840	RNA helicase 2
Zm00001d053066	NifU-like protein 2 chloroplastic
